# Supplementary material for: Gentrification drives patterns of alpha and beta diversity in cities
Source: PubMed Central journal article supplement — Proc Natl Acad Sci U S A. 2024 Apr 15;121(17):e2318596121. doi: 10.1073/pnas.2318596121 (PMC11047091; doi:10.1073/pnas.2318596121), 2024-04-15
Supplement: pnas.2318596121.sapp.pdf [file pnas.2318596121.sapp.pdf]

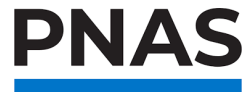

## Supporting information for

### Gentrification drives patterns of alpha and beta diversity in cities

Mason Fidino, Heather A. Sander, Jesse S. Lewis, Elizabeth W. Lehrer, Kimberly Rivera, Maureen H. Murray, Henry C. Adams, Anna Kase, Andrea Flores, Theodore Stankowich, Christopher J. Schell, Carmen M. Salsbury, Adam T. Rohnke, Mark J. Jordan, Austin M. Green, Ashley R. Gramza, Amanda J. Zellmer,, Jacque Williamson, Thilina D. Surasinghe, Hunter Storm, Kimberly L. Sparks, Travis J. Ryan, Katie R. Remine, Mary E. Pendergast, Kayleigh Mullen, Darren E. Minier, Christopher R. Middaugh, Amy L. Mertl, Maureen R. McClung, Robert A. Long, Rachel N. Larson, Michel T. Kohl, Lavendar R. Harris, Courtney T. Hall, Jeffrey D. Haight, David Drake, Alyssa M. Davidge, Ann O. Cheek, Christopher P. Bloch, Elizabeth G. Biro, Whitney J. B. Anthonysamy, Julia L. Angstmann, Maximilian L. Allen, Solny A. Adalsteinsson, Anne G. Short Gianotti, Jalene M. LaMontagne, Tiziana A. Gelmi-Candusso, Seth B. Magle

Mason Fidino

Email: [mfidino@lpzoo.org](mailto:mfidino@lpzoo.org)

#### **The PDF file includes:**

- Detailed description of statistical models
- Species detected and camera trap data summary (Tables S1 - S2)
- Additional Gentrification Metric Details (Tables S3 - S10)
- Map of Cities (Fig. S1)
- City-specific Alpha and Beta Diversity Results (Fig. S2 - S24)
- Alpha Diversity Model Estimates (Tables S11 - S13)
- Beta Diversity Model Estimates (Tables S14 - S16)
- Multi-city Multi-species Occupancy Model Estimates (Tables S17 - S36)
- SI References (1-10)

## Detailed description of statistical models

### The multi-city multi-species autologistic occupancy model

This model is almost exactly the same model as we had used in Magle et al. (1). For  $s$  in  $1, \dots, S$  species and  $c$  in  $1, \dots, C$  cities,  $\pi_{sc}$  is the probability species  $s$  is within city  $c$ . Further, let  $x_{sc}$  be a Bernoulli random variable that equals 1 if the species is within that city and is otherwise zero such that  $x_{sc} \sim \text{Bernoulli}(\pi_{sc})$ . We made  $\pi_{sc}$  a function of one covariate—the distance a city is from the known edge of a species extent—using the logit link. This covariate was positive if a city was within a species extent and negative if it was outside. We compiled range information from IUCN red list data (2). Thus the linear predictor for this level of the model was

$$\text{logit}(\pi_{sc}) = \mathbf{d}_s \mathbf{h}_c$$

where  $\mathbf{d}_s$  is a vector of species-specific covariates while  $\mathbf{h}_c$  is a vector of conformable regression coefficients where the leading element is 1 to accommodate the model intercept.

As the first level of the model estimates a species presence at the city-level, the next level estimates species presence within cities conditional on their presence in a city. Given that the number of sites and sampling periods varies across cities, we add a city subscript to define  $i_c$  in  $1, \dots, I_c$  sites and  $t_c$  in  $1, \dots, T_c$  sampling periods. However, for simplicity we drop these specific subscripts while we explain the model. Additionally, let  $z_{scit}$  be a Bernoulli random variable and  $\psi_{scit}$  be the probability of occupancy. As such,  $z_{scit} \sim \text{Bernoulli}(\psi_{scit} x_{sc})$ . As with the previous level of the model,  $\psi_{scit}$  can be made a function of covariates via the logit link. As a departure from the Magle et al. (1) parameterization, we added a first-order autologistic term to account for any temporal dependence in occupancy status between adjacent sampling periods within a city. Thus, for the first time period in a city, the logit-linear predictor was

$$\text{logit}(\psi_{scit=1}) = \beta_{sc} \mathbf{f}_{ci}$$

where  $\beta_{sc}$  is a vector of species and city-specific parameters and  $\mathbf{f}_{ci}$  is a vector of conformable covariates whose first value is 1 for the model intercept. After the first sampling season, we added our autologistic term

$$\text{logit}(\psi_{scit}) = \beta_{sc} \mathbf{f}_{ci} + \theta_{sc} z_{scit-1}, \text{ for } t > 1.$$

For the data model,  $y_{scit}$  was the number of days species  $s$  was detected at city  $c$  and site  $i$  on sampling season  $t$ . Given  $j_{cit}$  days of sampling, we assumed  $y_{scit}$  is a binomial random variable conditional on species presence

$$y_{scit} | z_{scit} \sim \text{Binomial}(j_{cit}, \rho_{scit} z_{scit})$$

where  $\rho_{scit}$  is the daily probability of detection that can be made a function of covariates with the logit link,

$$\text{logit}(\rho_{scit}) = \alpha_{sc} \mathbf{g}_{ci}$$

where  $\alpha_{sc}$  is a vector of parameters and  $\mathbf{g}_{ci}$  is a vector of conformable covariates where the leading value is 1 to accommodate the intercept.

Given that some species occur across multiple cities, there are multiple levels in which species could partially share information. At the top-level of the model we have the simplest hierarchical parameterization for parameters associated to  $\pi_{sc}$ , namely that there is a community mean for each parameter of which species-level coefficients vary around. We show this for the model intercept with the understanding that the same parameterization applies to all logit-scale covariates in this part of the model.

$$\bar{d}_{0s} \sim \text{Cauchy}(0, 2.5)$$

$$\sigma_{d_0} \sim \text{Inv-Gamma}(1, 1)$$

$$d_{0s} \sim \text{Normal}(\bar{d}_{0s}, \sigma_{d_0})$$

For the rest of the latent state model we add an additional hierarchical level to the model. However, this parameterization also aligns with the data model, and as such so we only describe it here once for the model intercept of the latent-state model. For example, for the model intercepts we begin with a community-level average among species and cities ( $\bar{\beta}_0$ ). This parameter partially informs a species-level average among cities ( $\bar{\beta}_{0s}$ ), which then informs species-specific coefficients in all cities ( $\beta_{0sc}$ ).

$$\begin{aligned}\bar{\beta}_0 &\sim \text{Cauchy}(0, 2.5) \\ \sigma_{\beta_0} &\sim \text{Inv-Gamma}(1, 1) \\ \bar{\beta}_{0s} &\sim \text{Normal}(\bar{\beta}_0, \sigma_{\beta_0}) \\ a_{\beta_0} &\sim \text{Uniform}(0, 10) \\ b_{\beta_0} &\sim \text{Uniform}(0, 10) \\ \sigma_{\beta_{0s}} &\sim \text{Inv-Gamma}(a_{\beta_0}, b_{\beta_0}) \\ \beta_{0sc} &\sim \text{Normal}(\bar{\beta}_{0s}, \sigma_{\beta_{0s}})\end{aligned}$$

We added the hyperparameters for the shape ( $a_{\beta_0}$ ) and rate ( $b_{\beta_0}$ ) of the Inv-Gamma distribution to account for the fact that some cities may only have one sampling period of data. Note that the above parameterization also applies to the autologistic term of the model ( $\theta_{sc}$ ).

Finally, the latent state and data model included one other set of parameters to account for variation in occupancy or detectability across sampling seasons. As we have already added hierarchical structure via the centered parameterization of the other model parameters, we use a non-centered parameterization here for this level of variability. Again, we show this for the latent state, but with a swapping of subscripts this could readily be applied to the data model as well.

$$\begin{aligned}a_{\psi} &\sim \text{Uniform}(0, 10) \\ b_{\psi} &\sim \text{Uniform}(0, 10) \\ \sigma_{\psi c} &\sim \text{Inv-Gamma}(a_{\psi}, b_{\psi}) \\ \beta_{sct} &\sim \text{Normal}(0, \sigma_{\psi c})\end{aligned}$$

With this parameterization,  $\beta_{sct}$  is a difference term that represents the logit-scale difference in occupancy for species  $s$  at city  $c$  from their average  $\beta_{0sc}$  (i.e., the model intercept). Again, like with the other parameters in this part of the model, we used hyperparameters for the Inv-Gamma distribution because not every city had more than one season of data.

### **The alpha diversity meta-analytic model**

From our occupancy model we created a posterior distribution for the latent state of each species at each site across all cities ( $z_{scit}$ ). From this, we derived two quantities for this model:

1. The mean expected species richness at each site across all sampling periods ( $r_{ci}$ ). To do so, we calculated the number of unique species detected in city  $c$  and site  $i$  across the  $t$  sampling seasons and took the median across 5000 posterior samples.
2. The standard deviation of the first quantity across those 5000 posterior samples ( $\sigma_{ci}$ ). This quantifies our level of uncertainty with the first estimate.

Following this, let  $\beta_c$  be a vector of city-specific regression coefficients and  $\mathbf{x}_{ci}$  be a vector of city and site specific covariates where the leading element is 1 to account for the intercept. Within the linear predictor we also added an additional residual variation term,  $\epsilon_{ci}$ , which was given a  $\sim \text{Inv-Gamma}(1, 1)$  prior. Thus, the log-linear predictor was

$$\log(\mu_{sc_i}) = \beta_c \mathbf{x}_{ci} + \epsilon_{ci}$$

and following Kéry and Royle (3), we accounted for variability in the response variable with an additional level of the model

$$r_{ci} \sim \text{Normal}(\mu_{sci}, \sigma_{ci})$$

We treated the intercept and slope terms as city-level random effects. For example, the prior for the model intercept was

$$\begin{aligned} \bar{\beta}_0 &\sim \text{Cauchy}(0, 2.5) \\ \sigma_{\beta_0} &\sim \text{Inv-Gamma}(1, 1) \\ \beta_{0c} &\sim \text{Normal}(\bar{\beta}_0, \sigma_{\beta_0}) \end{aligned}$$

and the same specification was also applied to the slope terms as well (though not described here).

### **The beta diversity meta-analytic model**

From our occupancy model, we created a posterior distribution for the latent state of each species at each site across all cities ( $z_{scit}$ ). From this, we derived three quantities:

1. The mean pairwise Sørensen dissimilarity between pairs of sites within each city across all sampling periods ( $v_{cik}$ , where the subscript  $k$  denotes one of the sites in city  $c$  that is not the  $i$ th site). To do so, we calculated the number of unique species detected in city  $c$  and site  $i$  across the  $t$  sampling seasons. Following this, we calculated the Sørensen dissimilarity metric among all pairs of sites within each city using `vegan` in R across 5000 posterior samples (4, 5). Finally, we took the median across all posterior samples for each site-pair
2. The standard deviation of the first quantity across those 5000 posterior samples ( $\sigma_{cik}$ ). This quantifies our level of uncertainty with the first estimate.
3. The mean expected number of unique species between a site-pair ( $w_{cik}$ ).

To estimate pairwise dissimilarity as a function of covariates we modified a generalized dissimilarity model (GDM) to account for parametric uncertainty of the response variable  $v_{cik}$  (6, 7). To do so, GDMs estimate the relationship between dissimilarity and environmental or spatial differences between pairs of sites with a clog link (7):

$$d_{cik} = 1 - \exp(-\eta_{cik})$$

where  $d_{cik}$  is the biological dissimilarity between sites  $i$  and  $k$  within city  $c$  and  $\eta_{cik}$  is the predicted ecological distance between (i.e., the linear predictor). Given  $p$  in  $1, \dots, P$  covariates, the ecological distance between sites is

$$\eta_{cik} = b_0 + \sum_{p=1}^P |f_p(x_{cip}) - f_p(x_{ckp})|$$

where  $b_0$  is the model intercept (i.e., the expected pairwise dissimilarity between sites with identical environments). Covariates are further transformed within GDMs which 1) uses I-spline basis functions (8) and 2) constrains slope terms to be non-negative. Doing so allows the effect of each covariate to non-linearly vary while also ensuring that beta diversity increases monotonically as sites are more different from one another (a core assumption of this model). More specifically, the I-spline basis function for predictor  $p$  with 3 basis functions (the default used for GDMs) is

$$f_p(x_{cip}) = \sum_{j=1}^3 a_{cpj} I_{pj}(x_{cip})$$

where  $a_{cpj}$  is a non-negative coefficient for the  $j$ th I-spline and  $I_{pj}$  is the  $j$ th I-spline of the covariate  $x_{cip}$ . For our own model, the binary gentrification status of site-pairs was not sent through an I-spline basis function. Instead,

we used a dummy variable that took the value of 1 if a pair of sites differed in their gentrification status and was otherwise 0. Regardless, all slope terms were constrained to be non-negative. Thus, given  $\eta_{cik}$  and the total number of species between site pairs ( $w_{cik}$ ), the first level of our model is

$$d_{cik} = 1 - \exp(-\eta_{cik})$$

$$\sigma_{cik} = \sqrt{\frac{d_{cik} - (1 - d_{cik})}{w_{cik}}}$$

$$\mu_{cik} \sim \text{Half-Normal}(d_{cik}, \sigma_{cik})$$

where  $\sigma_{cik}$  is the binomial variance function (6) and the half-Normal is constrained to be non-negative. Following this, we account for variation in the measurement of our response variable

$$v_{cik} \sim \text{Half-Normal}(\mu_{cik}, \sigma_{cik})$$

where again  $\sigma_{cik}$  is measured based on the output of the occupancy model and provided as data to this model.

We treated all coefficients in the linear predictor as city-level random effects. For example for the model intercept the prior specification would be  $b_c \sim \text{Half-Normal}(\bar{b}, \sigma_b)$  where  $b \sim \text{Half-Normal}(0, 10)$  and  $\sigma_b \sim \text{Inv-Gamma}(1, 1)$ . The Half-Normal distributions ensure that the coefficients will be non-negative.

## Species detected and camera trap data summary

**Table S1:** Species used in our analysis.

| Common name           | Scientific name                                                                               |
|-----------------------|-----------------------------------------------------------------------------------------------|
| armadillo             | <i>Dasypus novemcinctus</i>                                                                   |
| bobcat                | <i>Lynx rufus</i>                                                                             |
| cottontail sp         | <i>Sylvilagus audubonii</i> , <i>S. floridanus</i> , <i>S. bachmani</i> , <i>S. palustris</i> |
| coyote                | <i>Canis latrans</i>                                                                          |
| eastern chipmunk      | <i>Tamias striatus</i>                                                                        |
| elk                   | <i>Cervus canadensis</i>                                                                      |
| flying squirrel sp    | <i>Glaucomys volans</i> , <i>G. sabrinus</i>                                                  |
| fox squirrel          | <i>Sciurus niger</i>                                                                          |
| gray fox              | <i>Urocyon cinereoargenteus</i>                                                               |
| gray squirrel sp      | <i>Sciurus carolinensis</i> , <i>S. griseus</i>                                               |
| mule deer             | <i>Odocoileus hemionus</i>                                                                    |
| north american badger | <i>Taxidea taxus</i>                                                                          |
| north american beaver | <i>Castor canadensis</i>                                                                      |
| north american mink   | <i>Neovison vison</i>                                                                         |
| raccoon               | <i>Procyon lotor</i>                                                                          |
| red fox               | <i>Vulpes vulpes</i>                                                                          |
| red squirrel          | <i>Mephitis mephitis</i>                                                                      |
| striped skunk         | <i>Tamiasciurus hudsonicus</i>                                                                |
| virginia opossum      | <i>Didelphis virginiana</i>                                                                   |
| white tailed deer     | <i>Odocoileus virginianus</i>                                                                 |
| woodchuck             | <i>Marmota monax</i>                                                                          |

**Table S2:** The number of sites species were detected and number of detections per city. This table included all species, not only those we could use in our analysis. Table is ordered by city, and within each city species are sorted from fewest to most detections.

|    | City         | Species                    | Sites detected | Days detected |
|----|--------------|----------------------------|----------------|---------------|
| 9  | Athens, GA   | striped skunk              | 3              | 9             |
| 2  | Athens, GA   | bobcat                     | 7              | 31            |
| 8  | Athens, GA   | red fox                    | 10             | 64            |
| 5  | Athens, GA   | gray fox                   | 19             | 131           |
| 1  | Athens, GA   | armadillo                  | 19             | 156           |
| 10 | Athens, GA   | virginia opossum           | 20             | 172           |
| 3  | Athens, GA   | cottontail sp              | 14             | 175           |
| 4  | Athens, GA   | coyote                     | 17             | 191           |
| 7  | Athens, GA   | raccoon                    | 24             | 335           |
| 6  | Athens, GA   | gray squirrel sp           | 27             | 839           |
| 11 | Athens, GA   | white tailed deer          | 27             | 1321          |
| 20 | Bay Area, CA | north american river otter | 1              | 1             |
| 19 | Bay Area, CA | mule deer                  | 1              | 6             |
| 22 | Bay Area, CA | red fox                    | 4              | 10            |
| 12 | Bay Area, CA | bobcat                     | 5              | 41            |
| 13 | Bay Area, CA | california ground squirrel | 3              | 45            |
| 16 | Bay Area, CA | fox squirrel               | 8              | 132           |
| 14 | Bay Area, CA | cottontail sp              | 10             | 180           |
| 17 | Bay Area, CA | gray fox                   | 6              | 208           |
| 24 | Bay Area, CA | virginia opossum           | 9              | 271           |
| 23 | Bay Area, CA | striped skunk              | 30             | 283           |
| 25 | Bay Area, CA | white tailed deer          | 10             | 425           |
| 18 | Bay Area, CA | gray squirrel sp           | 24             | 480           |
| 15 | Bay Area, CA | coyote                     | 39             | 954           |
| 21 | Bay Area, CA | raccoon                    | 41             | 1770          |
| 33 | Boston, MA   | north american mink        | 1              | 1             |
| 30 | Boston, MA   | flying squirrel sp         | 1              | 2             |
| 39 | Boston, MA   | weasel sp                  | 1              | 2             |
| 41 | Boston, MA   | woodchuck                  | 3              | 4             |
| 31 | Boston, MA   | gray fox                   | 6              | 9             |
| 36 | Boston, MA   | red squirrel               | 4              | 13            |
| 37 | Boston, MA   | striped skunk              | 5              | 16            |
| 35 | Boston, MA   | red fox                    | 8              | 23            |
| 38 | Boston, MA   | virginia opossum           | 11             | 41            |
| 29 | Boston, MA   | fisher                     | 16             | 46            |
| 28 | Boston, MA   | eastern chipmunk           | 14             | 123           |
| 27 | Boston, MA   | coyote                     | 21             | 243           |
| 40 | Boston, MA   | white tailed deer          | 22             | 361           |
| 26 | Boston, MA   | cottontail sp              | 23             | 385           |
| 34 | Boston, MA   | raccoon                    | 26             | 436           |
| 32 | Boston, MA   | gray squirrel sp           | 27             | 1608          |
| 49 | Chicago, IL  | muskrat                    | 1              | 1             |
| 47 | Chicago, IL  | gray fox                   | 2              | 2             |
| 50 | Chicago, IL  | north american beaver      | 1              | 2             |
| 58 | Chicago, IL  | woodchuck                  | 3              | 3             |
| 56 | Chicago, IL  | weasel sp                  | 4              | 5             |
| 51 | Chicago, IL  | north american mink        | 10             | 16            |
| 45 | Chicago, IL  | flying squirrel sp         | 9              | 17            |

**Table S2:** The number of sites species were detected and number of detections per city. This table included all species, not only those we could use in our analysis. Table is ordered by city, and within each city species are sorted from fewest to most detections. *(continued)*

|     | City             | Species                  | Sites detected | Days detected |
|-----|------------------|--------------------------|----------------|---------------|
| 53  | Chicago, IL      | red fox                  | 10             | 26            |
| 44  | Chicago, IL      | eastern chipmunk         | 28             | 194           |
| 54  | Chicago, IL      | striped skunk            | 46             | 365           |
| 43  | Chicago, IL      | coyote                   | 78             | 914           |
| 46  | Chicago, IL      | fox squirrel             | 78             | 1159          |
| 55  | Chicago, IL      | virginia opossum         | 86             | 1554          |
| 42  | Chicago, IL      | cottontail sp            | 84             | 1814          |
| 57  | Chicago, IL      | white tailed deer        | 55             | 2563          |
| 52  | Chicago, IL      | raccoon                  | 94             | 3062          |
| 48  | Chicago, IL      | gray squirrel sp         | 99             | 5516          |
| 59  | Denver, CO       | black bear               | 1              | 1             |
| 73  | Denver, CO       | virginia opossum         | 1              | 1             |
| 63  | Denver, CO       | cougar                   | 2              | 2             |
| 68  | Denver, CO       | north american beaver    | 2              | 2             |
| 74  | Denver, CO       | white tailed deer        | 2              | 2             |
| 61  | Denver, CO       | bobcat                   | 3              | 3             |
| 71  | Denver, CO       | red squirrel             | 2              | 3             |
| 65  | Denver, CO       | elk                      | 3              | 10            |
| 72  | Denver, CO       | striped skunk            | 9              | 27            |
| 60  | Denver, CO       | black tailed prairie dog | 9              | 29            |
| 62  | Denver, CO       | cottontail sp            | 18             | 107           |
| 64  | Denver, CO       | coyote                   | 29             | 117           |
| 67  | Denver, CO       | mule deer                | 13             | 138           |
| 70  | Denver, CO       | red fox                  | 24             | 147           |
| 69  | Denver, CO       | raccoon                  | 27             | 252           |
| 66  | Denver, CO       | fox squirrel             | 37             | 1170          |
| 80  | Houston, TX      | gray fox                 | 3              | 9             |
| 76  | Houston, TX      | bobcat                   | 10             | 23            |
| 83  | Houston, TX      | striped skunk            | 4              | 31            |
| 85  | Houston, TX      | white tailed deer        | 2              | 49            |
| 78  | Houston, TX      | coyote                   | 18             | 68            |
| 75  | Houston, TX      | armadillo                | 14             | 221           |
| 82  | Houston, TX      | raccoon                  | 21             | 360           |
| 81  | Houston, TX      | gray squirrel sp         | 23             | 434           |
| 77  | Houston, TX      | cottontail sp            | 16             | 460           |
| 79  | Houston, TX      | fox squirrel             | 23             | 489           |
| 84  | Houston, TX      | virginia opossum         | 22             | 536           |
| 92  | Indianapolis, IN | north american badger    | 1              | 1             |
| 98  | Indianapolis, IN | striped skunk            | 2              | 3             |
| 91  | Indianapolis, IN | muskrat                  | 3              | 6             |
| 93  | Indianapolis, IN | north american beaver    | 6              | 15            |
| 94  | Indianapolis, IN | north american mink      | 9              | 37            |
| 88  | Indianapolis, IN | eastern chipmunk         | 11             | 66            |
| 90  | Indianapolis, IN | gray squirrel sp         | 21             | 155           |
| 97  | Indianapolis, IN | red squirrel             | 19             | 181           |
| 96  | Indianapolis, IN | red fox                  | 31             | 220           |
| 101 | Indianapolis, IN | woodchuck                | 16             | 240           |
| 87  | Indianapolis, IN | coyote                   | 37             | 422           |



**Table S2:** The number of sites species were detected and number of detections per city. This table included all species, not only those we could use in our analysis. Table is ordered by city, and within each city species are sorted from fewest to most detections. *(continued)*

|     | City             | Species               | Sites detected | Days detected |
|-----|------------------|-----------------------|----------------|---------------|
| 100 | Indianapolis, IN | white tailed deer     | 33             | 1091          |
| 99  | Indianapolis, IN | virginia opossum      | 40             | 1743          |
| 86  | Indianapolis, IN | cottontail sp         | 40             | 1798          |
| 89  | Indianapolis, IN | fox squirrel          | 39             | 3786          |
| 95  | Indianapolis, IN | raccoon               | 40             | 4658          |
| 106 | Iowa City, IA    | flying squirrel sp    | 1              | 1             |
| 110 | Iowa City, IA    | muskrat               | 1              | 1             |
| 112 | Iowa City, IA    | north american beaver | 1              | 1             |
| 108 | Iowa City, IA    | gray fox              | 2              | 2             |
| 111 | Iowa City, IA    | north american badger | 4              | 4             |
| 102 | Iowa City, IA    | bobcat                | 6              | 9             |
| 116 | Iowa City, IA    | striped skunk         | 12             | 34            |
| 113 | Iowa City, IA    | north american mink   | 19             | 61            |
| 119 | Iowa City, IA    | woodchuck             | 20             | 116           |
| 104 | Iowa City, IA    | coyote                | 34             | 309           |
| 105 | Iowa City, IA    | eastern chipmunk      | 19             | 311           |
| 115 | Iowa City, IA    | red fox               | 35             | 652           |
| 107 | Iowa City, IA    | fox squirrel          | 28             | 690           |
| 117 | Iowa City, IA    | virginia opossum      | 36             | 1202          |
| 103 | Iowa City, IA    | cottontail sp         | 35             | 1659          |
| 118 | Iowa City, IA    | white tailed deer     | 36             | 3281          |
| 109 | Iowa City, IA    | gray squirrel sp      | 37             | 3337          |
| 114 | Iowa City, IA    | raccoon               | 37             | 3878          |
| 129 | Jackson, MS      | striped skunk         | 3              | 8             |
| 121 | Jackson, MS      | bobcat                | 5              | 13            |
| 124 | Jackson, MS      | fox squirrel          | 4              | 13            |
| 123 | Jackson, MS      | coyote                | 14             | 46            |
| 125 | Jackson, MS      | gray fox              | 13             | 51            |
| 122 | Jackson, MS      | cottontail sp         | 12             | 82            |
| 120 | Jackson, MS      | armadillo             | 19             | 150           |
| 128 | Jackson, MS      | red fox               | 26             | 397           |
| 130 | Jackson, MS      | virginia opossum      | 34             | 641           |
| 131 | Jackson, MS      | white tailed deer     | 32             | 1054          |
| 127 | Jackson, MS      | raccoon               | 34             | 1162          |
| 126 | Jackson, MS      | gray squirrel sp      | 34             | 2469          |
| 141 | Little Rock, AR  | north american beaver | 1              | 1             |
| 142 | Little Rock, AR  | north american mink   | 3              | 6             |
| 137 | Little Rock, AR  | flying squirrel sp    | 6              | 19            |
| 133 | Little Rock, AR  | bobcat                | 10             | 32            |
| 148 | Little Rock, AR  | woodchuck             | 8              | 36            |
| 136 | Little Rock, AR  | eastern chipmunk      | 5              | 55            |
| 144 | Little Rock, AR  | red fox               | 11             | 56            |
| 135 | Little Rock, AR  | coyote                | 23             | 89            |
| 145 | Little Rock, AR  | striped skunk         | 11             | 101           |
| 139 | Little Rock, AR  | gray fox              | 20             | 304           |
| 132 | Little Rock, AR  | armadillo             | 24             | 466           |
| 138 | Little Rock, AR  | fox squirrel          | 26             | 652           |
| 134 | Little Rock, AR  | cottontail sp         | 25             | 655           |

**Table S2:** The number of sites species were detected and number of detections per city. This table included all species, not only those we could use in our analysis. Table is ordered by city, and within each city species are sorted from fewest to most detections. *(continued)*

|     | City            | Species                      | Sites detected | Days detected |
|-----|-----------------|------------------------------|----------------|---------------|
| 147 | Little Rock, AR | white tailed deer            | 22             | 803           |
| 146 | Little Rock, AR | virginia opossum             | 29             | 1647          |
| 143 | Little Rock, AR | raccoon                      | 28             | 1720          |
| 140 | Little Rock, AR | gray squirrel sp             | 29             | 2285          |
| 154 | Madison, WI     | north american beaver        | 1              | 1             |
| 161 | Madison, WI     | woodchuck                    | 1              | 1             |
| 155 | Madison, WI     | north american mink          | 1              | 3             |
| 152 | Madison, WI     | gray fox                     | 1              | 4             |
| 159 | Madison, WI     | weasel sp                    | 1              | 5             |
| 151 | Madison, WI     | eastern chipmunk             | 3              | 13            |
| 157 | Madison, WI     | striped skunk                | 4              | 16            |
| 150 | Madison, WI     | coyote                       | 7              | 23            |
| 160 | Madison, WI     | white tailed deer            | 7              | 46            |
| 158 | Madison, WI     | virginia opossum             | 13             | 52            |
| 156 | Madison, WI     | raccoon                      | 13             | 101           |
| 149 | Madison, WI     | cottontail sp                | 16             | 218           |
| 153 | Madison, WI     | gray squirrel sp             | 22             | 322           |
| 167 | Metro LA, CA    | eastern chipmunk             | 2              | 5             |
| 165 | Metro LA, CA    | cougar                       | 3              | 8             |
| 169 | Metro LA, CA    | gray fox                     | 8              | 76            |
| 168 | Metro LA, CA    | fox squirrel                 | 16             | 79            |
| 172 | Metro LA, CA    | raccoon                      | 23             | 114           |
| 170 | Metro LA, CA    | gray squirrel sp             | 7              | 127           |
| 173 | Metro LA, CA    | striped skunk                | 23             | 216           |
| 171 | Metro LA, CA    | mule deer                    | 21             | 322           |
| 174 | Metro LA, CA    | virginia opossum             | 18             | 330           |
| 163 | Metro LA, CA    | california ground squirrel   | 20             | 386           |
| 162 | Metro LA, CA    | bobcat                       | 26             | 394           |
| 166 | Metro LA, CA    | coyote                       | 39             | 1535          |
| 164 | Metro LA, CA    | cottontail sp                | 28             | 1914          |
| 188 | Phoenix, AZ     | antelope ground squirrel     | 1              | 1             |
| 201 | Phoenix, AZ     | north american beaver        | 1              | 3             |
| 191 | Phoenix, AZ     | cougar                       | 8              | 20            |
| 202 | Phoenix, AZ     | north american river otter   | 6              | 25            |
| 195 | Phoenix, AZ     | hooded skunk                 | 8              | 44            |
| 205 | Phoenix, AZ     | round tailed ground squirrel | 10             | 53            |
| 200 | Phoenix, AZ     | north american badger        | 8              | 77            |
| 199 | Phoenix, AZ     | mule deer                    | 16             | 154           |
| 206 | Phoenix, AZ     | striped skunk                | 17             | 181           |
| 198 | Phoenix, AZ     | kit fox                      | 11             | 198           |
| 197 | Phoenix, AZ     | javelina                     | 42             | 356           |
| 203 | Phoenix, AZ     | raccoon                      | 46             | 429           |
| 189 | Phoenix, AZ     | bobcat                       | 48             | 585           |
| 194 | Phoenix, AZ     | harris antelope squirrel     | 21             | 612           |
| 193 | Phoenix, AZ     | gray fox                     | 40             | 655           |
| 204 | Phoenix, AZ     | rock squirrel                | 49             | 758           |
| 196 | Phoenix, AZ     | jackrabbit sp                | 46             | 2627          |
| 192 | Phoenix, AZ     | coyote                       | 82             | 3855          |

**Table S2:** The number of sites species were detected and number of detections per city. This table included all species, not only those we could use in our analysis. Table is ordered by city, and within each city species are sorted from fewest to most detections. *(continued)*

|     | City               | Species                    | Sites detected | Days detected |
|-----|--------------------|----------------------------|----------------|---------------|
| 190 | Phoenix, AZ        | cottontail sp              | 65             | 5190          |
| 214 | Portland, Oregon   | north american beaver      | 1              | 1             |
| 207 | Portland, Oregon   | california ground squirrel | 1              | 3             |
| 217 | Portland, Oregon   | striped skunk              | 2              | 4             |
| 215 | Portland, Oregon   | north american river otter | 1              | 7             |
| 219 | Portland, Oregon   | western chipmunk           | 2              | 15            |
| 210 | Portland, Oregon   | douglas squirrel           | 7              | 32            |
| 218 | Portland, Oregon   | virginia opossum           | 8              | 73            |
| 216 | Portland, Oregon   | raccoon                    | 14             | 82            |
| 213 | Portland, Oregon   | mule deer                  | 12             | 122           |
| 209 | Portland, Oregon   | coyote                     | 19             | 159           |
| 208 | Portland, Oregon   | cottontail sp              | 18             | 183           |
| 211 | Portland, Oregon   | fox squirrel               | 19             | 238           |
| 212 | Portland, Oregon   | gray squirrel sp           | 19             | 370           |
| 227 | Rochester, NY      | north american beaver      | 1              | 1             |
| 228 | Rochester, NY      | north american mink        | 2              | 2             |
| 223 | Rochester, NY      | fisher                     | 2              | 5             |
| 232 | Rochester, NY      | striped skunk              | 4              | 5             |
| 225 | Rochester, NY      | gray fox                   | 5              | 11            |
| 224 | Rochester, NY      | flying squirrel sp         | 3              | 17            |
| 231 | Rochester, NY      | red squirrel               | 8              | 40            |
| 221 | Rochester, NY      | coyote                     | 13             | 53            |
| 235 | Rochester, NY      | woodchuck                  | 8              | 58            |
| 220 | Rochester, NY      | cottontail sp              | 12             | 108           |
| 233 | Rochester, NY      | virginia opossum           | 19             | 126           |
| 222 | Rochester, NY      | eastern chipmunk           | 13             | 253           |
| 229 | Rochester, NY      | raccoon                    | 22             | 300           |
| 234 | Rochester, NY      | white tailed deer          | 20             | 440           |
| 230 | Rochester, NY      | red fox                    | 23             | 506           |
| 226 | Rochester, NY      | gray squirrel sp           | 22             | 1308          |
| 286 | Saint Louis, MO    | flying squirrel sp         | 2              | 2             |
| 291 | Saint Louis, MO    | north american river otter | 2              | 2             |
| 282 | Saint Louis, MO    | bobcat                     | 4              | 4             |
| 290 | Saint Louis, MO    | north american mink        | 6              | 9             |
| 288 | Saint Louis, MO    | gray fox                   | 8              | 21            |
| 294 | Saint Louis, MO    | striped skunk              | 9              | 75            |
| 297 | Saint Louis, MO    | woodchuck                  | 14             | 79            |
| 285 | Saint Louis, MO    | eastern chipmunk           | 11             | 81            |
| 281 | Saint Louis, MO    | armadillo                  | 8              | 224           |
| 284 | Saint Louis, MO    | coyote                     | 27             | 350           |
| 293 | Saint Louis, MO    | red fox                    | 24             | 356           |
| 283 | Saint Louis, MO    | cottontail sp              | 25             | 581           |
| 287 | Saint Louis, MO    | fox squirrel               | 28             | 640           |
| 295 | Saint Louis, MO    | virginia opossum           | 32             | 1510          |
| 292 | Saint Louis, MO    | raccoon                    | 35             | 2978          |
| 296 | Saint Louis, MO    | white tailed deer          | 25             | 3037          |
| 289 | Saint Louis, MO    | gray squirrel sp           | 35             | 7115          |
| 254 | Salt Lake City, UT | fox squirrel               | 1              | 1             |

**Table S2:** The number of sites species were detected and number of detections per city. This table included all species, not only those we could use in our analysis. Table is ordered by city, and within each city species are sorted from fewest to most detections. *(continued)*

|     | City               | Species                    | Sites detected | Days detected |
|-----|--------------------|----------------------------|----------------|---------------|
| 258 | Salt Lake City, UT | north american badger      | 1              | 1             |
| 266 | Salt Lake City, UT | weasel sp                  | 1              | 1             |
| 267 | Salt Lake City, UT | yellow bellied marmot      | 1              | 1             |
| 248 | Salt Lake City, UT | black bear                 | 1              | 2             |
| 257 | Salt Lake City, UT | muskrat                    | 2              | 2             |
| 253 | Salt Lake City, UT | elk                        | 4              | 6             |
| 259 | Salt Lake City, UT | north american beaver      | 3              | 8             |
| 251 | Salt Lake City, UT | cougar                     | 9              | 10            |
| 250 | Salt Lake City, UT | cottontail sp              | 4              | 11            |
| 260 | Salt Lake City, UT | north american porcupine   | 9              | 13            |
| 249 | Salt Lake City, UT | bobcat                     | 12             | 15            |
| 263 | Salt Lake City, UT | red squirrel               | 11             | 36            |
| 262 | Salt Lake City, UT | red fox                    | 15             | 53            |
| 264 | Salt Lake City, UT | rock squirrel              | 11             | 63            |
| 255 | Salt Lake City, UT | moose                      | 27             | 66            |
| 252 | Salt Lake City, UT | coyote                     | 31             | 71            |
| 265 | Salt Lake City, UT | striped skunk              | 25             | 79            |
| 261 | Salt Lake City, UT | raccoon                    | 31             | 150           |
| 256 | Salt Lake City, UT | mule deer                  | 67             | 570           |
| 242 | Sanford, FL        | gray fox                   | 1              | 1             |
| 237 | Sanford, FL        | black bear                 | 2              | 2             |
| 241 | Sanford, FL        | flying squirrel sp         | 3              | 3             |
| 245 | Sanford, FL        | red fox                    | 3              | 14            |
| 238 | Sanford, FL        | bobcat                     | 8              | 17            |
| 239 | Sanford, FL        | cottontail sp              | 10             | 54            |
| 240 | Sanford, FL        | coyote                     | 16             | 54            |
| 236 | Sanford, FL        | armadillo                  | 16             | 116           |
| 246 | Sanford, FL        | virginia opossum           | 16             | 159           |
| 247 | Sanford, FL        | white tailed deer          | 13             | 230           |
| 244 | Sanford, FL        | raccoon                    | 21             | 316           |
| 243 | Sanford, FL        | gray squirrel sp           | 26             | 439           |
| 279 | Seattle, WA        | striped skunk              | 1              | 1             |
| 274 | Seattle, WA        | flying squirrel sp         | 1              | 2             |
| 277 | Seattle, WA        | north american river otter | 2              | 2             |
| 273 | Seattle, WA        | elk                        | 1              | 12            |
| 272 | Seattle, WA        | douglas squirrel           | 5              | 14            |
| 268 | Seattle, WA        | black bear                 | 3              | 15            |
| 269 | Seattle, WA        | bobcat                     | 8              | 15            |
| 280 | Seattle, WA        | virginia opossum           | 18             | 195           |
| 276 | Seattle, WA        | mule deer                  | 13             | 326           |
| 271 | Seattle, WA        | coyote                     | 23             | 339           |
| 270 | Seattle, WA        | cottontail sp              | 20             | 438           |
| 278 | Seattle, WA        | raccoon                    | 28             | 646           |
| 275 | Seattle, WA        | gray squirrel sp           | 28             | 1510          |
| 305 | Tacoma, WA         | fox squirrel               | 1              | 1             |
| 298 | Tacoma, WA         | black bear                 | 1              | 2             |
| 308 | Tacoma, WA         | mountain beaver            | 1              | 2             |
| 313 | Tacoma, WA         | weasel sp                  | 5              | 5             |

**Table S2:** The number of sites species were detected and number of detections per city. This table included all species, not only those we could use in our analysis. Table is ordered by city, and within each city species are sorted from fewest to most detections. *(continued)*

|     | City                       | Species                    | Sites detected | Days detected |
|-----|----------------------------|----------------------------|----------------|---------------|
| 299 | Tacoma, WA                 | bobcat                     | 3              | 12            |
| 303 | Tacoma, WA                 | eastern chipmunk           | 5              | 29            |
| 314 | Tacoma, WA                 | western chipmunk           | 5              | 58            |
| 307 | Tacoma, WA                 | jackrabbit sp              | 9              | 79            |
| 304 | Tacoma, WA                 | elk                        | 5              | 92            |
| 311 | Tacoma, WA                 | striped skunk              | 8              | 136           |
| 302 | Tacoma, WA                 | douglas squirrel           | 11             | 231           |
| 312 | Tacoma, WA                 | virginia opossum           | 31             | 548           |
| 301 | Tacoma, WA                 | coyote                     | 36             | 574           |
| 300 | Tacoma, WA                 | cottontail sp              | 29             | 637           |
| 309 | Tacoma, WA                 | mule deer                  | 27             | 879           |
| 310 | Tacoma, WA                 | raccoon                    | 40             | 1333          |
| 306 | Tacoma, WA                 | gray squirrel sp           | 35             | 2226          |
| 319 | Urbana, IL                 | flying squirrel sp         | 1              | 1             |
| 324 | Urbana, IL                 | north american beaver      | 2              | 2             |
| 315 | Urbana, IL                 | bobcat                     | 3              | 3             |
| 322 | Urbana, IL                 | muskrat                    | 1              | 3             |
| 323 | Urbana, IL                 | north american badger      | 1              | 3             |
| 326 | Urbana, IL                 | north american river otter | 2              | 3             |
| 331 | Urbana, IL                 | weasel sp                  | 3              | 3             |
| 325 | Urbana, IL                 | north american mink        | 18             | 83            |
| 328 | Urbana, IL                 | red fox                    | 18             | 115           |
| 329 | Urbana, IL                 | striped skunk              | 16             | 160           |
| 333 | Urbana, IL                 | woodchuck                  | 16             | 250           |
| 317 | Urbana, IL                 | coyote                     | 31             | 336           |
| 318 | Urbana, IL                 | eastern chipmunk           | 18             | 399           |
| 320 | Urbana, IL                 | fox squirrel               | 27             | 1577          |
| 316 | Urbana, IL                 | cottontail sp              | 31             | 1582          |
| 330 | Urbana, IL                 | virginia opossum           | 34             | 1642          |
| 332 | Urbana, IL                 | white tailed deer          | 33             | 2267          |
| 321 | Urbana, IL                 | gray squirrel sp           | 33             | 2268          |
| 327 | Urbana, IL                 | raccoon                    | 35             | 2519          |
| 181 | Washington D.C. metro area | north american mink        | 2              | 2             |
| 182 | Washington D.C. metro area | north american river otter | 2              | 2             |
| 178 | Washington D.C. metro area | flying squirrel sp         | 3              | 6             |
| 179 | Washington D.C. metro area | gray fox                   | 2              | 18            |
| 176 | Washington D.C. metro area | coyote                     | 29             | 82            |
| 187 | Washington D.C. metro area | woodchuck                  | 19             | 105           |
| 177 | Washington D.C. metro area | eastern chipmunk           | 21             | 346           |
| 175 | Washington D.C. metro area | cottontail sp              | 30             | 485           |
| 185 | Washington D.C. metro area | virginia opossum           | 45             | 710           |
| 184 | Washington D.C. metro area | red fox                    | 75             | 2422          |
| 183 | Washington D.C. metro area | raccoon                    | 75             | 3157          |
| 186 | Washington D.C. metro area | white tailed deer          | 69             | 3349          |
| 180 | Washington D.C. metro area | gray squirrel sp           | 73             | 4872          |
| 348 | Wilmington, DE             | weasel sp                  | 1              | 1             |
| 342 | Wilmington, DE             | north american river otter | 3              | 8             |
| 337 | Wilmington, DE             | flying squirrel sp         | 3              | 9             |

**Table S2:** The number of sites species were detected and number of detections per city. This table included all species, not only those we could use in our analysis. Table is ordered by city, and within each city species are sorted from fewest to most detections. *(continued)*

|     | City           | Species               | Sites detected | Days detected |
|-----|----------------|-----------------------|----------------|---------------|
| 339 | Wilmington, DE | muskrat               | 2              | 10            |
| 335 | Wilmington, DE | coyote                | 6              | 16            |
| 341 | Wilmington, DE | north american mink   | 8              | 32            |
| 345 | Wilmington, DE | red squirrel          | 2              | 32            |
| 346 | Wilmington, DE | striped skunk         | 13             | 59            |
| 340 | Wilmington, DE | north american beaver | 7              | 68            |
| 336 | Wilmington, DE | eastern chipmunk      | 6              | 80            |
| 350 | Wilmington, DE | woodchuck             | 19             | 184           |
| 334 | Wilmington, DE | cottontail sp         | 23             | 431           |
| 347 | Wilmington, DE | virginia opossum      | 28             | 688           |
| 344 | Wilmington, DE | red fox               | 29             | 2161          |
| 349 | Wilmington, DE | white tailed deer     | 28             | 2221          |
| 343 | Wilmington, DE | raccoon               | 29             | 2579          |
| 338 | Wilmington, DE | gray squirrel sp      | 29             | 3898          |

## **Additional gentrification metrics**

As previously stated we used a slightly modified version of the gentrification metric proposed by Chapple et al. (9). This metric used a two-step process to identify gentrification. First, for an area to be gentrifying, it must be vulnerable to gentrification at the start of the study (in this case that is 2010). For our version of this metric a Census tract to be vulnerable to gentrification it must:

1. Have had at least 500 residents in year 2010.
2. Have had at least two of these three qualities
  - a. The median income of residents in the Census tract must be lower than the city's average income.
  - b. The proportion of college-educated residents in the census-tract must be lower than the proportion of college-educated residents across the city.
  - c. The proportion of nonwhite residents in the Census tract must be greater than the proportion of nonwhite residents across the city.

After calculating Census tract vulnerability, we created a 500m radius buffer around each camera trapping location within a city and intersected that buffer with the Census tract level vulnerability index. This buffer was chosen to capture the general area around each site that easily fell within the home range of any species in our analysis. For example, a site could be right on the edge of a non-vulnerable Census tract that abuts a vulnerable Census tract and we would want to identify that location as 'vulnerable.'

Of 999 UWIN sites across 20 cities, 474 (47.4%) were considered vulnerable to gentrification.

Following this, a Census tract was considered gentrifying if at the end of the study (in this case that is 2019) a Census tract:

1. Was vulnerable to gentrification in 2010.
2. The change in median income was greater than the average change across the city, after correcting for inflation.
3. Had at least one of these two qualities.
  - a. The change in the proportion of college educated residents was greater than average change across the city.
  - b. The change in the proportion of non-hispanic white residents was greater than the average change across the city.

Of the 474 sites that were vulnerable to gentrification, about half of them of them were gentrifying ( $n = 264$ , 55.7%). However, there is a substantial amount of variation among cities. For example, Urbana, IL only had one of thirty five sites near a gentrifying Census tract while Phoenix, AZ had exactly half of their 96 sites in gentrifying areas.

### ***Retrieving the census data***

We used the `tidycensus` package in R to query census data from the year 2010 and 2019 (10). The 2010 data came from the 10-year decennial census whereas the 2019 data came from the 5-year American Community Survey.

Across these years we compiled data the aforementioned variables for all Census tracts that were within the general area of a UWIN transect. To do so we created a bounding box around the camera trap locations for each city, added a 500m buffer, and then cropped the census data.

### ***Step 1. Determine which areas are vulnerable to gentrification***

After cropping the Census tracts to an area around a cities sampled location, we calculated the regional median (i.e., median income across Census tracts) and identified Census tracts that fell below that number in 2010.

**Table S3:** The number of sites that were above (False) and below (True) the median income across Census tracts in 2010. This was used to help determine if sites were vulnerable to gentrification.

| City                       | False | True |
|----------------------------|-------|------|
| Athens, GA                 | 14    | 14   |
| Bay Area, CA               | 36    | 10   |
| Boston, MA                 | 24    | 3    |
| Chicago, IL                | 59    | 44   |
| Denver, CO                 | 19    | 20   |
| Houston, TX                | 18    | 7    |
| Indianapolis, IN           | 26    | 15   |
| Iowa City, IA              | 28    | 9    |
| Jackson, MS                | 26    | 18   |
| Little Rock, AR            | 19    | 10   |
| Madison, WI                | 12    | 10   |
| Metro LA, CA               | 35    | 10   |
| Washington D.C. metro area | 46    | 29   |
| Phoenix, AZ                | 48    | 44   |
| Portland, Oregon           | 18    | 5    |
| Rochester, NY              | 13    | 10   |
| Sanford, FL                | 14    | 14   |
| Salt Lake City, UT         | 83    | 16   |
| Seattle, WA                | 19    | 14   |
| Saint Louis, MO            | 24    | 11   |
| Tacoma, WA                 | 18    | 23   |
| Urbana, IL                 | 19    | 16   |
| Wilmington, DE             | 17    | 12   |



Following this, we calculated the median educational attainment in 2010 across Census tracts, which was calculated similarly to income. We simplified the census data into two categories for educational attainment: those with a college degree and those without a college degree.

**Table S4:** The number of sites that were above (False) and below (True) the median educational attainment (i.e., college degree) across Census tracts in 2010. This was used to help determine if sites were vulnerable to gentrification.

| City                       | False | True |
|----------------------------|-------|------|
| Athens, GA                 | 19    | 9    |
| Bay Area, CA               | 34    | 12   |
| Boston, MA                 | 18    | 9    |
| Chicago, IL                | 55    | 48   |
| Denver, CO                 | 14    | 25   |
| Houston, TX                | 19    | 6    |
| Indianapolis, IN           | 26    | 15   |
| Iowa City, IA              | 15    | 22   |
| Jackson, MS                | 29    | 15   |
| Little Rock, AR            | 16    | 13   |
| Madison, WI                | 12    | 10   |
| Metro LA, CA               | 39    | 6    |
| Washington D.C. metro area | 41    | 34   |
| Phoenix, AZ                | 49    | 43   |
| Portland, Oregon           | 13    | 10   |
| Rochester, NY              | 13    | 10   |
| Sanford, FL                | 15    | 13   |
| Salt Lake City, UT         | 85    | 14   |
| Seattle, WA                | 16    | 17   |
| Saint Louis, MO            | 23    | 12   |
| Tacoma, WA                 | 27    | 14   |
| Urbana, IL                 | 12    | 23   |
| Wilmington, DE             | 19    | 10   |

We then calculated whether Census tracts had at least 500 people in 2010. The educational attainment data also had information on the number of people in each Census tract, so we used that to create a binary metric for whether or not a Census tract in 2010 had at least 500 people living in them. Of the 8133 Census tracts across all cities, only 114 of them had fewer than 500 residents.

The final metric we obtained to determine the vulnerability of Census tracts was whether the proportion of non-hispanic white people living there was lower than the regional median.

**Table S5:** The number of sites near Census tracts that had more (False) or less (True) than the regional median of non-hispanic white residents in 2010. This was used to help determine if sites were vulnerable to gentrification.

| City                       | False | True |
|----------------------------|-------|------|
| Athens, GA                 | 15    | 13   |
| Bay Area, CA               | 29    | 17   |
| Boston, MA                 | 17    | 10   |
| Chicago, IL                | 57    | 46   |
| Denver, CO                 | 21    | 18   |
| Houston, TX                | 16    | 9    |
| Indianapolis, IN           | 26    | 15   |
| Iowa City, IA              | 19    | 18   |
| Jackson, MS                | 30    | 14   |
| Little Rock, AR            | 20    | 9    |
| Madison, WI                | 12    | 10   |
| Metro LA, CA               | 43    | 2    |
| Washington D.C. metro area | 42    | 33   |
| Phoenix, AZ                | 40    | 52   |
| Portland, Oregon           | 15    | 8    |
| Rochester, NY              | 13    | 10   |
| Sanford, FL                | 17    | 11   |
| Salt Lake City, UT         | 85    | 14   |
| Seattle, WA                | 19    | 14   |
| Saint Louis, MO            | 21    | 14   |
| Tacoma, WA                 | 27    | 14   |
| Urbana, IL                 | 21    | 14   |
| Wilmington, DE             | 9     | 20   |

Finally, after combining these metrics we can arrive at the number of sites that were vulnerable to gentrification in 2010.

**Table S6:** The number of sites that were (True) and were not (False) vulnerable to gentrification in 2010.

| City                       | False | True |
|----------------------------|-------|------|
| Athens, GA                 | 11    | 17   |
| Bay Area, CA               | 32    | 16   |
| Boston, MA                 | 15    | 12   |
| Chicago, IL                | 43    | 60   |
| Denver, CO                 | 11    | 28   |
| Houston, TX                | 16    | 9    |
| Indianapolis, IN           | 23    | 18   |
| Iowa City, IA              | 24    | 13   |
| Jackson, MS                | 23    | 21   |
| Little Rock, AR            | 19    | 10   |
| Madison, WI                | 5     | 17   |
| Metro LA, CA               | 35    | 10   |
| Washington D.C. metro area | 31    | 44   |
| Phoenix, AZ                | 33    | 63   |
| Portland, Oregon           | 13    | 10   |
| Rochester, NY              | 11    | 12   |
| Sanford, FL                | 13    | 15   |
| Salt Lake City, UT         | 80    | 19   |
| Seattle, WA                | 18    | 15   |
| Saint Louis, MO            | 21    | 14   |
| Tacoma, WA                 | 24    | 17   |
| Urbana, IL                 | 15    | 20   |
| Wilmington, DE             | 12    | 17   |

***Step 2. Determine which vulnerable Census tracts gentrified***

This step here required us to compare Census tracts over time (i.e., between 2010 and 2019). However, Census tracts are not constant and are regularly redrawn. As a result, it can be difficult to make a 1 to 1 comparison of Census tracts over time. To address this we used areal interpolation. To do so we first rasterized the 2010 census data at a 500m resolution. Second, we joined the 2019 Census tracts to these data and took the spatial average (i.e., weighted unions by their area). For example, if Census tracts did not change over time, this would technique would provide a close to direct comparison (i.e., a 2019 Census tract would mostly intersect the rasterized values of the same 2010 Census tract). If a Census tract did change, the 2019 Census tract would take the spatial average over the 2010 Census tracts it intersected with.

After doing this we calculated the median change in income and educational attainment. We also calculated if the proportion of non-hispanic white residents in Census tracts increased more than the regional median increase (i.e., more non-hispanic white people moved in than average).

Here is a table that shows how many sites are above (TRUE) and below (FALSE) the average change in educational attainment.

**Table S7:** The number of sites where the increase in educational attainment (i.e., a college degree) between 2010 and 2019 was (True) and was not (False) greater than the city average.

| City                       | False | True |
|----------------------------|-------|------|
| Athens, GA                 | 15    | 13   |
| Bay Area, CA               | 27    | 19   |
| Boston, MA                 | 18    | 7    |
| Chicago, IL                | 56    | 48   |
| Denver, CO                 | 21    | 18   |
| Houston, TX                | 14    | 11   |
| Indianapolis, IN           | 16    | 25   |
| Iowa City, IA              | 14    | 23   |
| Jackson, MS                | 20    | 24   |
| Little Rock, AR            | 18    | 9    |
| Madison, WI                | 12    | 10   |
| Metro LA, CA               | 27    | 15   |
| Washington D.C. metro area | 45    | 29   |
| Phoenix, AZ                | 53    | 34   |
| Portland, Oregon           | 15    | 8    |
| Rochester, NY              | 7     | 16   |
| Sanford, FL                | 9     | 19   |
| Salt Lake City, UT         | 79    | 20   |
| Seattle, WA                | 16    | 17   |
| Saint Louis, MO            | 16    | 19   |
| Tacoma, WA                 | 24    | 17   |
| Urbana, IL                 | 26    | 9    |
| Wilmington, DE             | 18    | 11   |

**Table S8:** The number of sites that where the change in the proportion of non-hispanic white residents was greater than the city average between 2010 and 2019.

| City                       | False | True |
|----------------------------|-------|------|
| Athens, GA                 | 18    | 10   |
| Bay Area, CA               | 27    | 19   |
| Boston, MA                 | 12    | 13   |
| Chicago, IL                | 66    | 38   |
| Denver, CO                 | 22    | 17   |
| Houston, TX                | 16    | 9    |
| Indianapolis, IN           | 19    | 22   |
| Iowa City, IA              | 20    | 17   |
| Jackson, MS                | 26    | 18   |
| Little Rock, AR            | 18    | 9    |
| Madison, WI                | 10    | 12   |
| Metro LA, CA               | 32    | 11   |
| Washington D.C. metro area | 42    | 32   |
| Phoenix, AZ                | 33    | 54   |
| Portland, Oregon           | 16    | 7    |
| Rochester, NY              | 17    | 6    |
| Sanford, FL                | 16    | 12   |
| Salt Lake City, UT         | 62    | 37   |
| Seattle, WA                | 10    | 23   |
| Saint Louis, MO            | 7     | 28   |
| Tacoma, WA                 | 18    | 23   |
| Urbana, IL                 | 8     | 27   |
| Wilmington, DE             | 17    | 12   |



For income, in addition to areal interpolation we adjusted for inflation. To do so we used the U.S. Bureau of Labor Statistics inflation calculator to determine how much the price of \$1 has changed between January 2010 and January 2019 (it is \$1.17). Thus, we multiplied the dollar values of median housing prices in 2000 by 1.17 before comparing changes in housing prices.

**Table S9:** The number of sites that do (True) and do not (False) reside in Census tracts where the median income increased more than the regional median.

| City                       | False | True |
|----------------------------|-------|------|
| Athens, GA                 | 18    | 10   |
| Bay Area, CA               | 25    | 21   |
| Boston, MA                 | 18    | 9    |
| Chicago, IL                | 58    | 46   |
| Denver, CO                 | 20    | 19   |
| Houston, TX                | 14    | 11   |
| Indianapolis, IN           | 19    | 22   |
| Iowa City, IA              | 10    | 27   |
| Jackson, MS                | 27    | 17   |
| Little Rock, AR            | 13    | 16   |
| Madison, WI                | 12    | 10   |
| Metro LA, CA               | 27    | 18   |
| Washington D.C. metro area | 50    | 25   |
| Phoenix, AZ                | 52    | 40   |
| Portland, Oregon           | 13    | 10   |
| Rochester, NY              | 16    | 7    |
| Sanford, FL                | 9     | 19   |
| Salt Lake City, UT         | 39    | 60   |
| Seattle, WA                | 20    | 13   |
| Saint Louis, MO            | 12    | 23   |
| Tacoma, WA                 | 11    | 30   |
| Urbana, IL                 | 24    | 11   |
| Wilmington, DE             | 20    | 9    |

After compiling these metrics we are able to combine them with our gentrification vulnerability values to determine which Census tracts gentrified. Finally, we determined which sites were within 500m of a gentrified Census tract.

**Table S10:** The number of sites that were vulnerable to gentrification in 2010 but did not gentrify, the number of sites that did gentrify, and the number of sites that were not vulnerable so could not gentrify.

| City                       | Vulnerable but did not gentrify | Gentrified | Not vulnerable so did not gentrify |
|----------------------------|---------------------------------|------------|------------------------------------|
| Athens, GA                 | 13                              | 4          | 11                                 |
| Bay Area, CA               | 6                               | 9          | 31                                 |
| Boston, MA                 | 4                               | 8          | 15                                 |
| Chicago, IL                | 26                              | 34         | 43                                 |
| Denver, CO                 | 12                              | 16         | 11                                 |
| Houston, TX                | 4                               | 5          | 16                                 |
| Indianapolis, IN           | 5                               | 13         | 23                                 |
| Iowa City, IA              | 10                              | 3          | 24                                 |
| Jackson, MS                | 11                              | 10         | 23                                 |
| Little Rock, AR            | 6                               | 4          | 19                                 |
| Madison, WI                | 12                              | 5          | 5                                  |
| Metro LA, CA               | 2                               | 8          | 35                                 |
| Washington D.C. metro area | 19                              | 25         | 31                                 |
| Phoenix, AZ                | 15                              | 46         | 31                                 |
| Portland, Oregon           | 4                               | 6          | 13                                 |
| Rochester, NY              | 7                               | 5          | 11                                 |
| Sanford, FL                | 5                               | 10         | 13                                 |
| Salt Lake City, UT         | 9                               | 10         | 80                                 |
| Seattle, WA                | 7                               | 8          | 18                                 |
| Saint Louis, MO            | 5                               | 9          | 21                                 |
| Tacoma, WA                 | 4                               | 13         | 24                                 |
| Urbana, IL                 | 19                              | 1          | 15                                 |
| Wilmington, DE             | 5                               | 12         | 12                                 |

## Map of cities

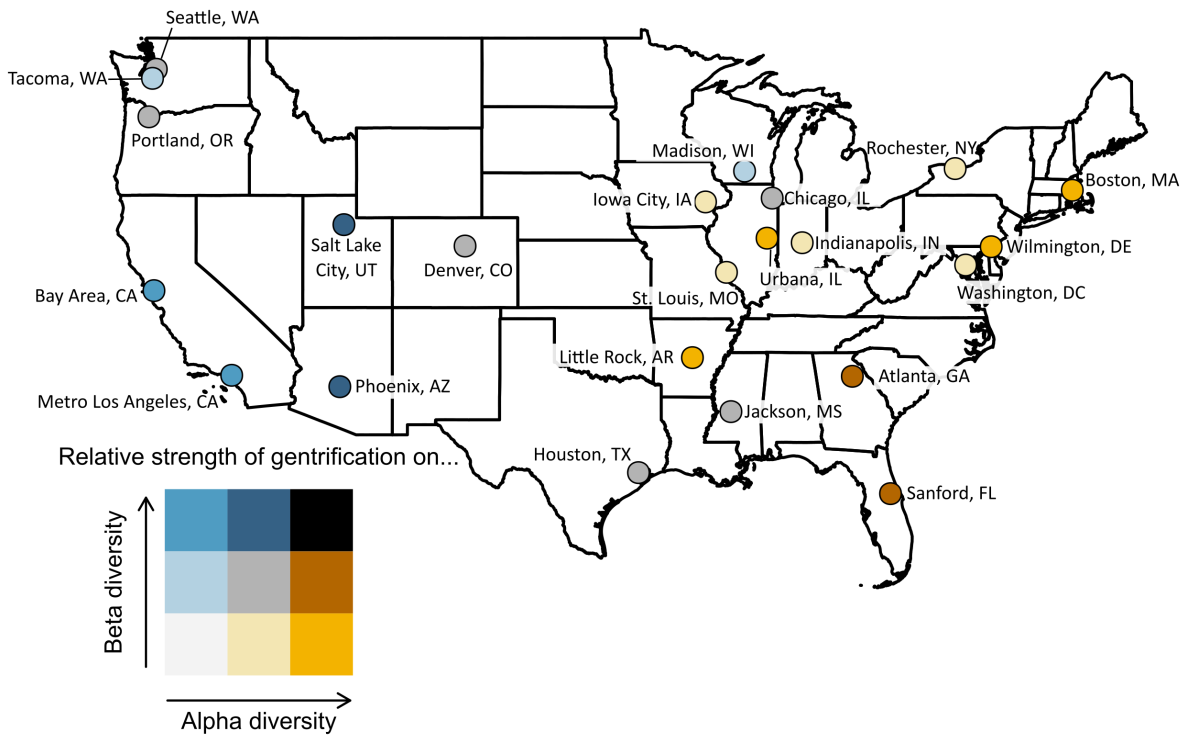

**Figure S1:** Figure S1. Data from 23 cities were used to assess differences in mammal communities among gentrified and non-gentrified parts of a city. Cities are represented by dots. Dot color illustrates the relative effect of gentrification on alpha and beta diversity at average sites in each city that only vary in their gentrification status. Gentrification had a more pronounced effect on alpha diversity overall. However, gentrification in West Coast cities had a stronger effect on beta diversity, central U.S. cities had a mixture, and East Coast cities had a stronger alpha diversity effect.

## City-specific alpha and beta diversity results

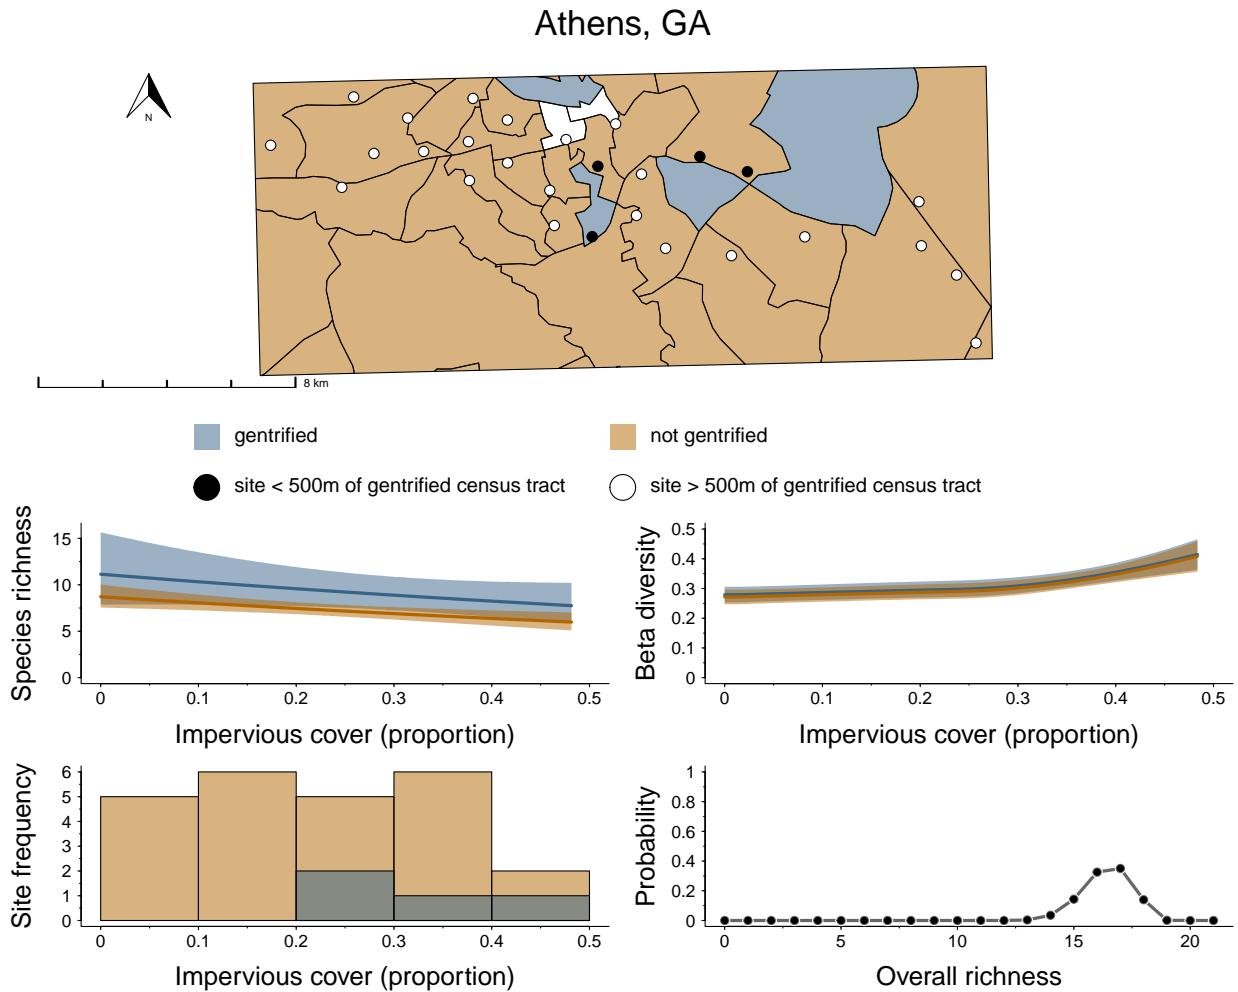

**Figure S2.** The distribution of gentrifying and non-gentrifying Census tracts for Athens, GA as well as the camera trap locations for this city. Below the map are city specific estimates for how alpha diversity (species richness) and beta diversity (Sørensen's dissimilarity index) varies at gentrifying and non-gentrifying sites along a gradient of impervious cover. The lower left histogram shows the proportion of impervious cover at gentrifying and non-gentrifying camera trap locations for Athens, GA. Finally, the lower right plot shows the estimate for total species richness of medium to large mammals for the city (i.e., gamma diversity).

## Bay Area, CA

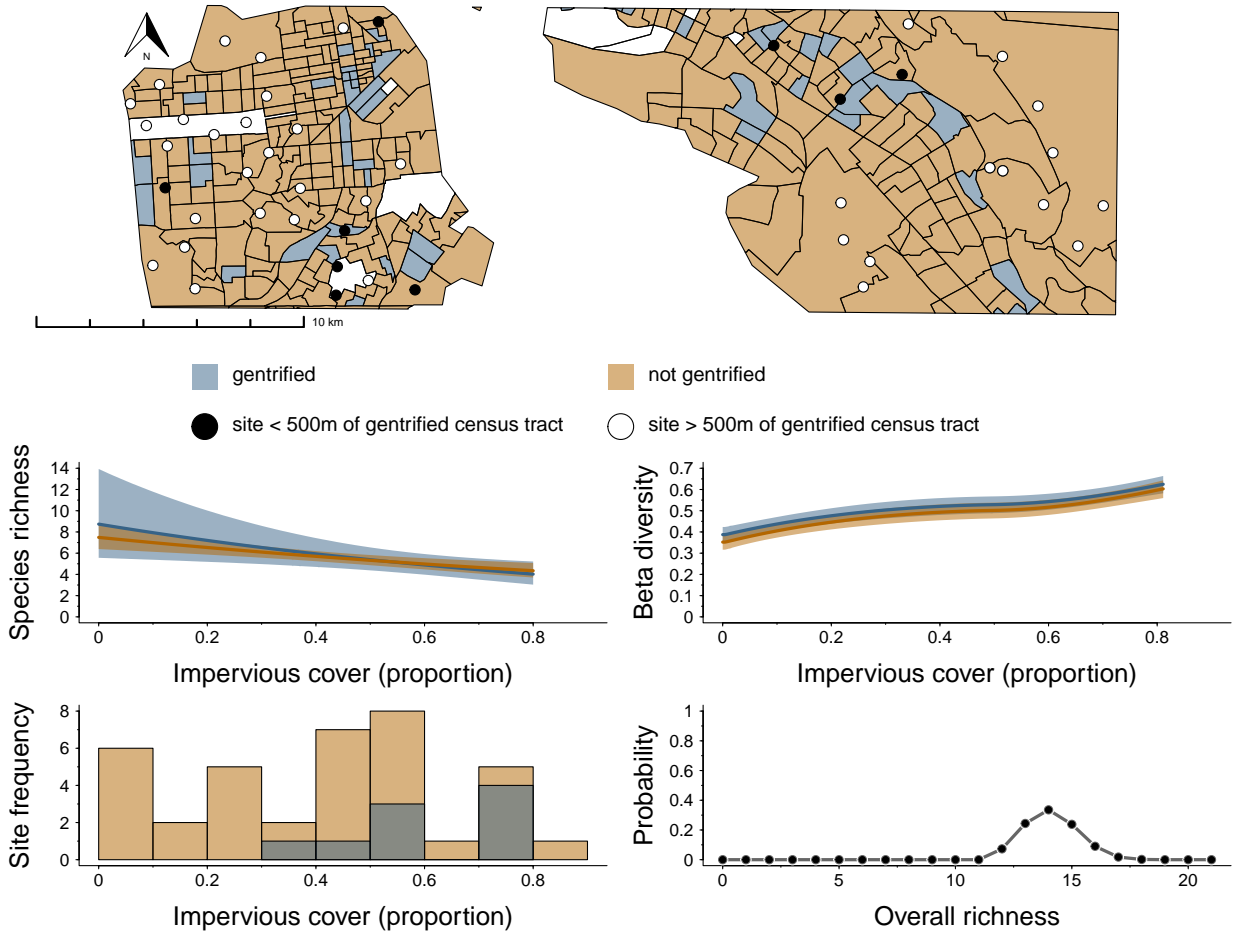

**Figure S3.** The distribution of gentrifying and non-gentrifying Census tracts for Bay Area, CA as well as the camera trap locations for this city. Below the map are city specific estimates for how alpha diversity (species richness) and beta diversity (Sørensen's dissimilarity index) varies at gentrifying and non-gentrifying sites along a gradient of impervious cover. The lower left histogram shows the proportion of impervious cover at gentrifying and non-gentrifying camera trap locations for Bay Area, CA. Finally, the lower right plot shows the estimate for total species richness of medium to large mammals for the city (i.e., gamma diversity).

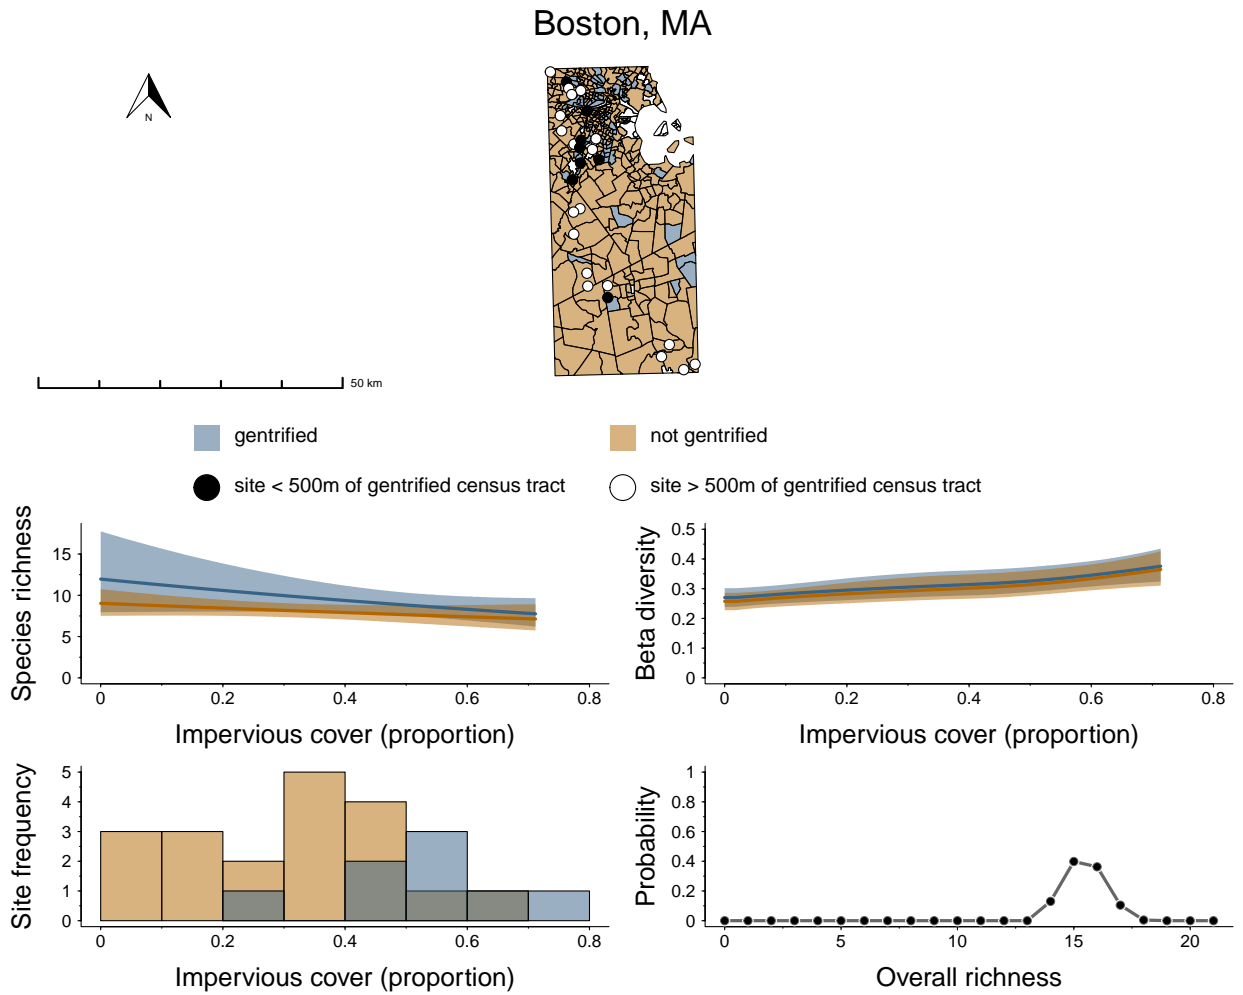

**Figure S4.** The distribution of gentrifying and non-gentrifying Census tracts for Boston, MA as well as the camera trap locations for this city. Below the map are city specific estimates for how alpha diversity (species richness) and beta diversity (Sørensen’s dissimilarity index) varies at gentrifying and non-gentrifying sites along a gradient of impervious cover. The lower left histogram shows the proportion of impervious cover at gentrifying and non-gentrifying camera trap locations for Boston, MA. Finally, the lower right plot shows the estimate for total species richness of medium to large mammals for the city (i.e., gamma diversity).



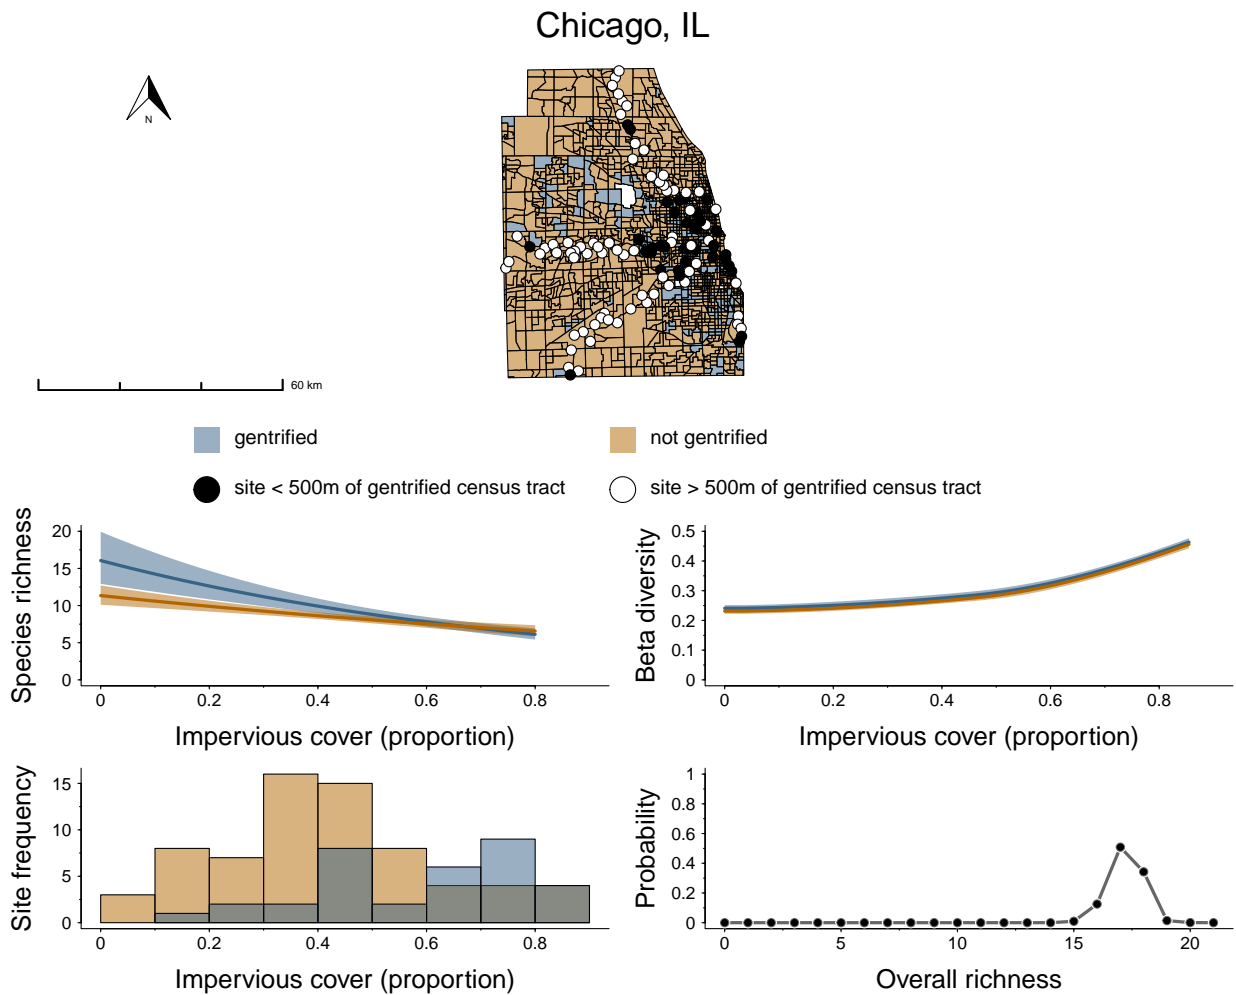

**Figure S5.** The distribution of gentrifying and non-gentrifying Census tracts for Chicago, IL as well as the camera trap locations for this city. Below the map are city specific estimates for how alpha diversity (species richness) and beta diversity (Sørensen’s dissimilarity index) varies at gentrifying and non-gentrifying sites along a gradient of impervious cover. The lower left histogram shows the proportion of impervious cover at gentrifying and non-gentrifying camera trap locations for Chicago, IL. Finally, the lower right plot shows the estimate for total species richness of medium to large mammals for the city (i.e., gamma diversity).

# Denver, CO

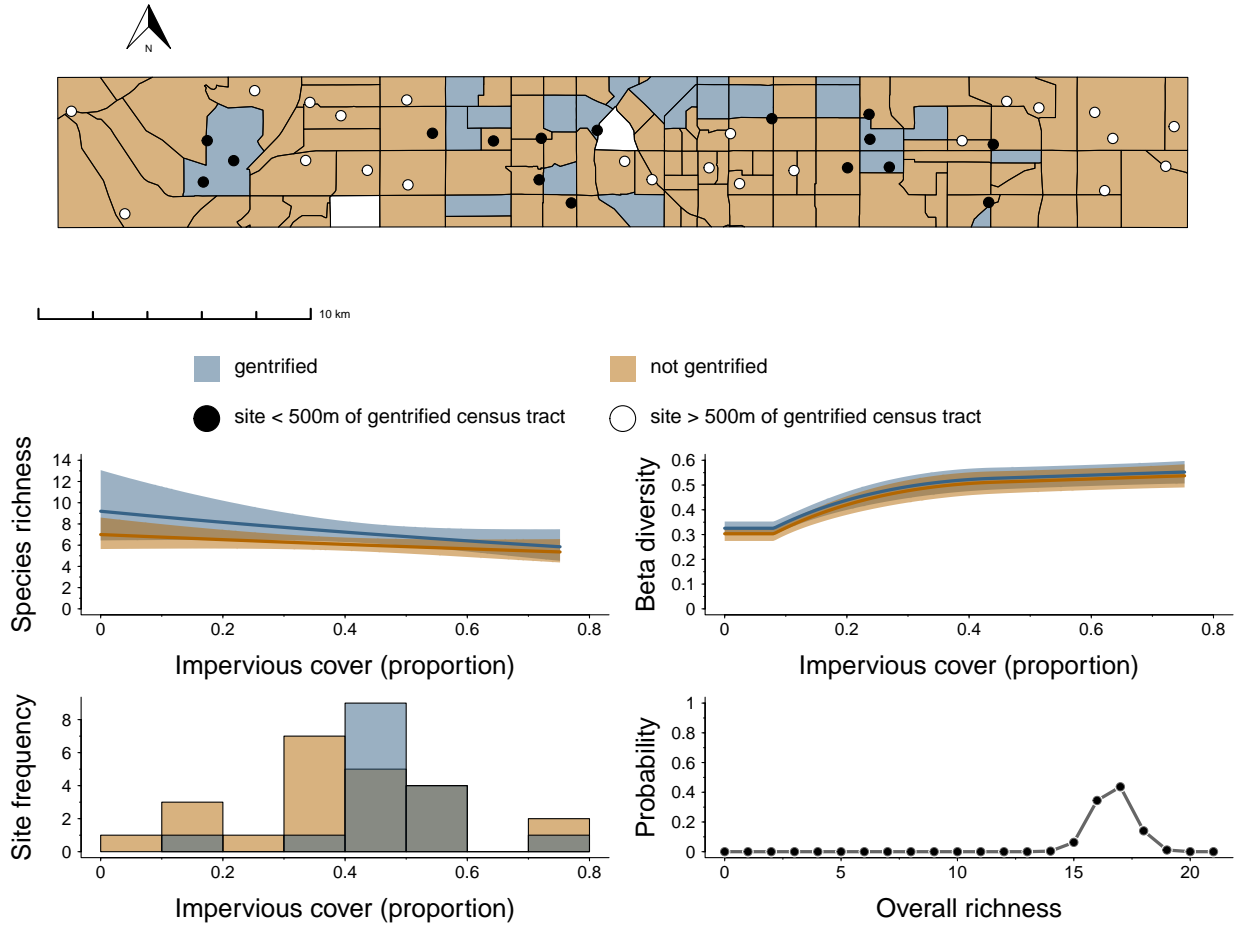

**Figure S6.** The distribution of gentrifying and non-gentrifying Census tracts for Denver, CO as well as the camera trap locations for this city. Below the map are city specific estimates for how alpha diversity (species richness) and beta diversity (Sørensen's dissimilarity index) varies at gentrifying and non-gentrifying sites along a gradient of impervious cover. The lower left histogram shows the proportion of impervious cover at gentrifying and non-gentrifying camera trap locations for Denver, CO. Finally, the lower right plot shows the estimate for total species richness of medium to large mammals for the city (i.e., gamma diversity).

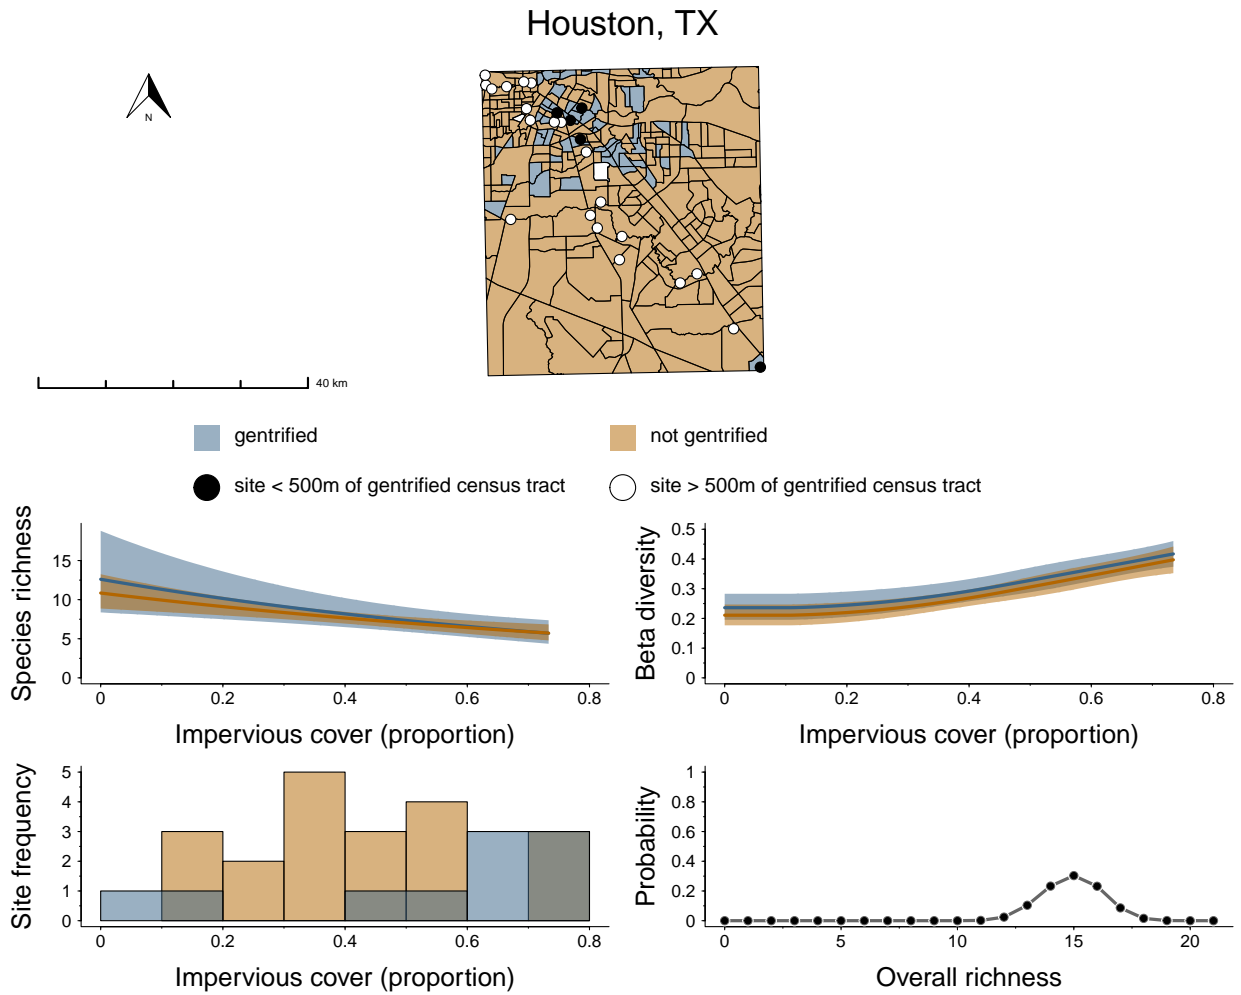

**Figure S7.** The distribution of gentrifying and non-gentrifying Census tracts for Houston, TX as well as the camera trap locations for this city. Below the map are city specific estimates for how alpha diversity (species richness) and beta diversity (Sørensen’s dissimilarity index) varies at gentrifying and non-gentrifying sites along a gradient of impervious cover. The lower left histogram shows the proportion of impervious cover at gentrifying and non-gentrifying camera trap locations for Houston, TX. Finally, the lower right plot shows the estimate for total species richness of medium to large mammals for the city (i.e., gamma diversity).

## Indianapolis, IN

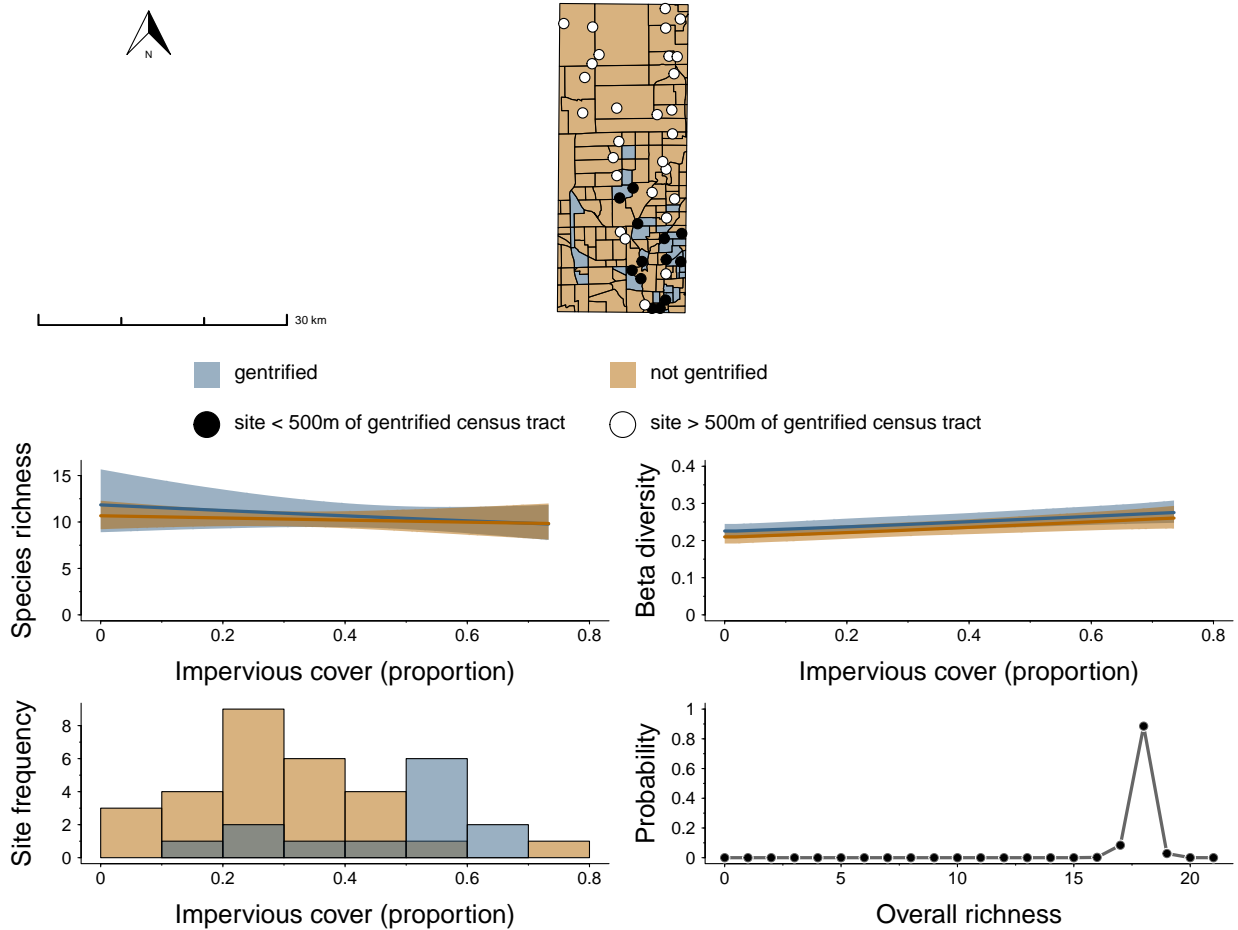

**Figure S8.** The distribution of gentrifying and non-gentrifying Census tracts for Indianapolis, IN as well as the camera trap locations for this city. Below the map are city specific estimates for how alpha diversity (species richness) and beta diversity (Sørensen’s dissimilarity index) varies at gentrifying and non-gentrifying sites along a gradient of impervious cover. The lower left histogram shows the proportion of impervious cover at gentrifying and non-gentrifying camera trap locations for Indianapolis, IN. Finally, the lower right plot shows the estimate for total species richness of medium to large mammals for the city (i.e., gamma diversity).

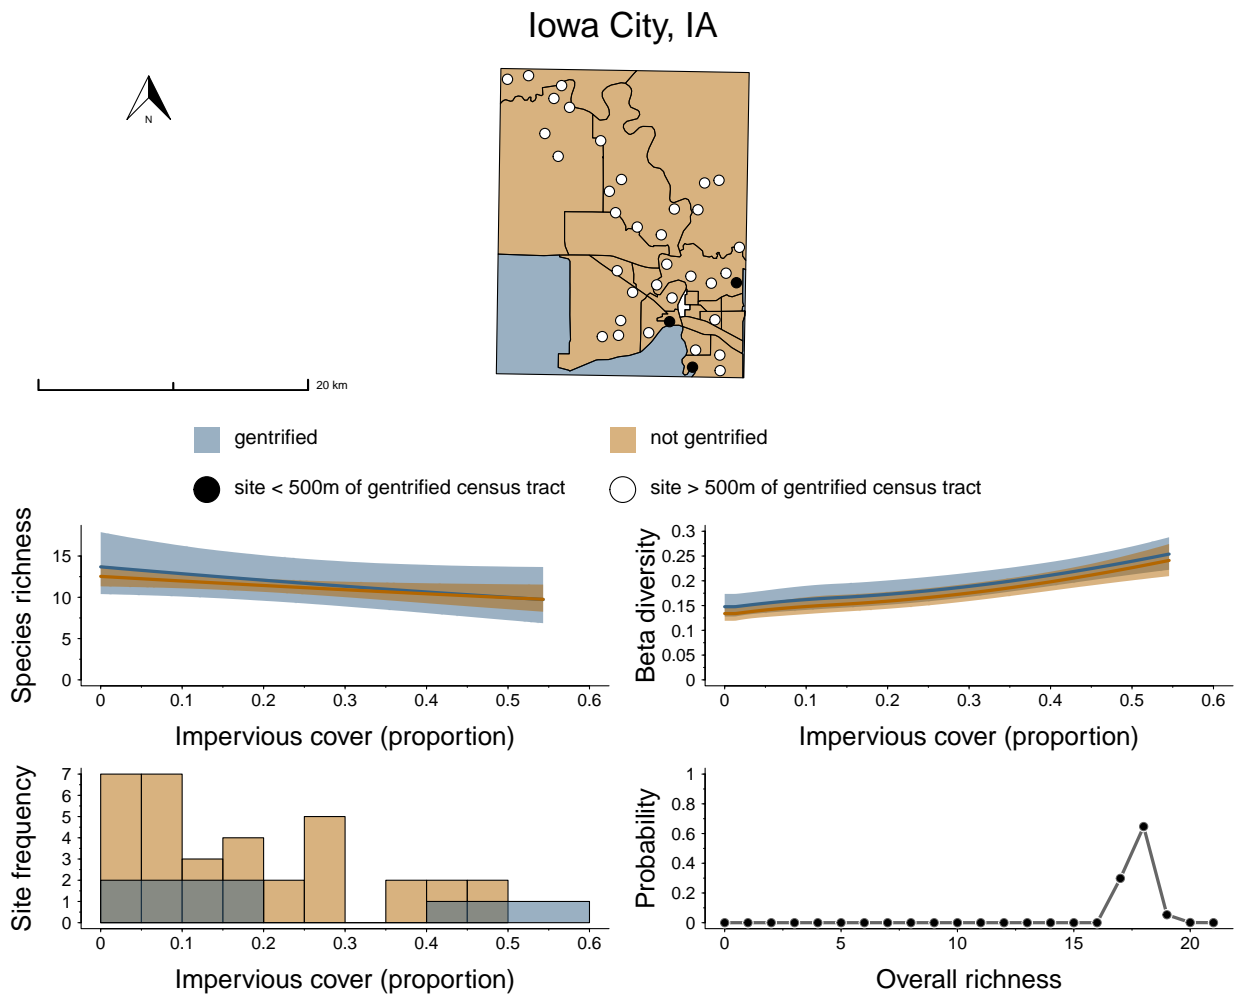

**Figure S9.** The distribution of gentrifying and non-gentrifying Census tracts for Iowa City, IA as well as the camera trap locations for this city. Below the map are city specific estimates for how alpha diversity (species richness) and beta diversity (Sørensen’s dissimilarity index) varies at gentrifying and non-gentrifying sites along a gradient of impervious cover. The lower left histogram shows the proportion of impervious cover at gentrifying and non-gentrifying camera trap locations for Iowa City, IA. Finally, the lower right plot shows the estimate for total species richness of medium to large mammals for the city (i.e., gamma diversity).

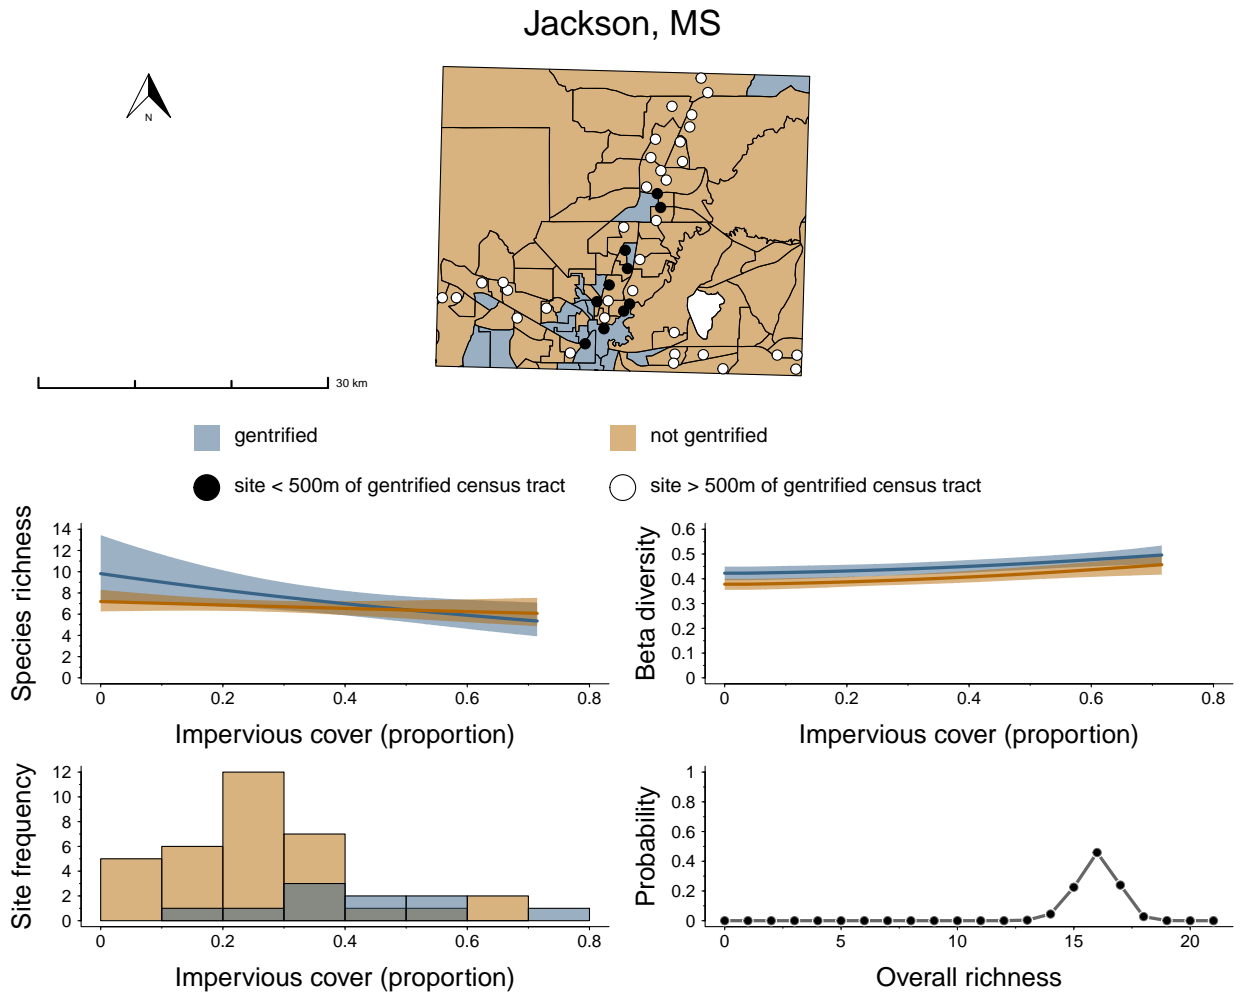

**Figure S10.** The distribution of gentrifying and non-gentrifying Census tracts for Jackson, MS as well as the camera trap locations for this city. Below the map are city specific estimates for how alpha diversity (species richness) and beta diversity (Sørensen’s dissimilarity index) varies at gentrifying and non-gentrifying sites along a gradient of impervious cover. The lower left histogram shows the proportion of impervious cover at gentrifying and non-gentrifying camera trap locations for Jackson, MS. Finally, the lower right plot shows the estimate for total species richness of medium to large mammals for the city (i.e., gamma diversity).

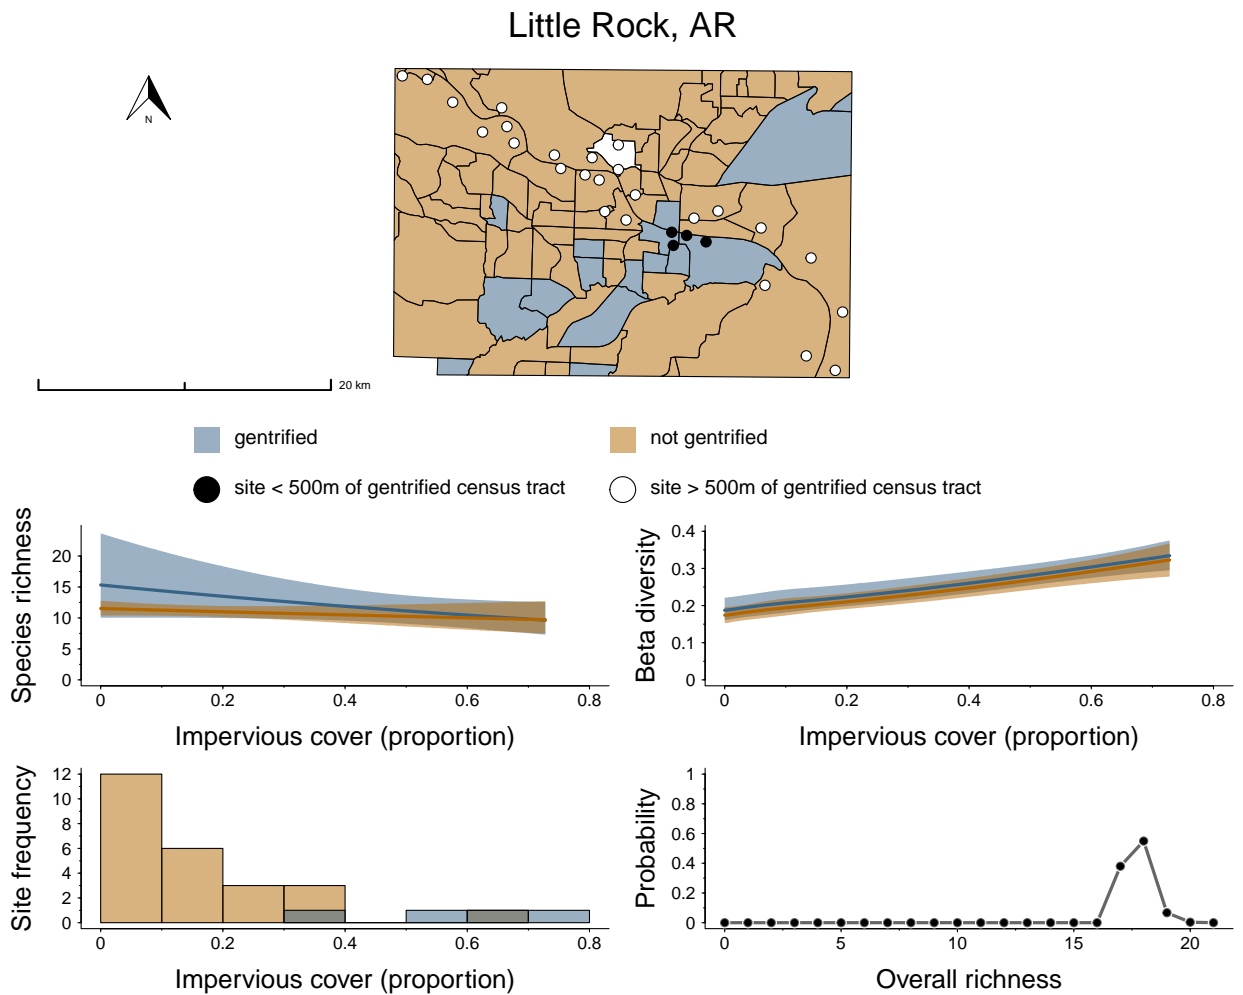

**Figure S11.** The distribution of gentrifying and non-gentrifying Census tracts for Little Rock, AR as well as the camera trap locations for this city. Below the map are city specific estimates for how alpha diversity (species richness) and beta diversity (Sørensen’s dissimilarity index) varies at gentrifying and non-gentrifying sites along a gradient of impervious cover. The lower left histogram shows the proportion of impervious cover at gentrifying and non-gentrifying camera trap locations for Little Rock, AR. Finally, the lower right plot shows the estimate for total species richness of medium to large mammals for the city (i.e., gamma diversity).

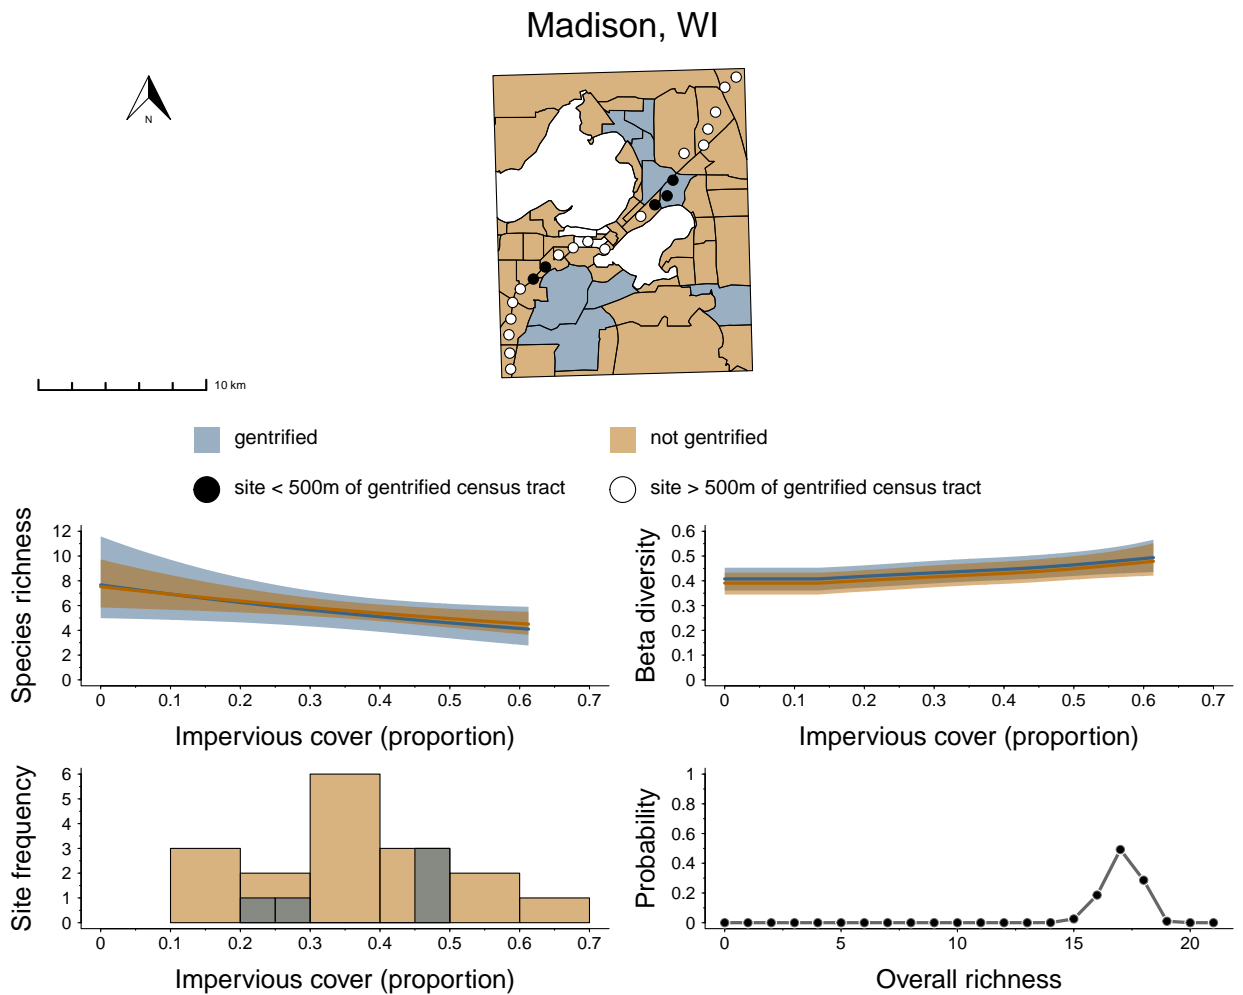

**Figure S12.** The distribution of gentrifying and non-gentrifying Census tracts for Madison, WI as well as the camera trap locations for this city. Below the map are city specific estimates for how alpha diversity (species richness) and beta diversity (Sørensen’s dissimilarity index) varies at gentrifying and non-gentrifying sites along a gradient of impervious cover. The lower left histogram shows the proportion of impervious cover at gentrifying and non-gentrifying camera trap locations for Madison, WI. Finally, the lower right plot shows the estimate for total species richness of medium to large mammals for the city (i.e., gamma diversity).



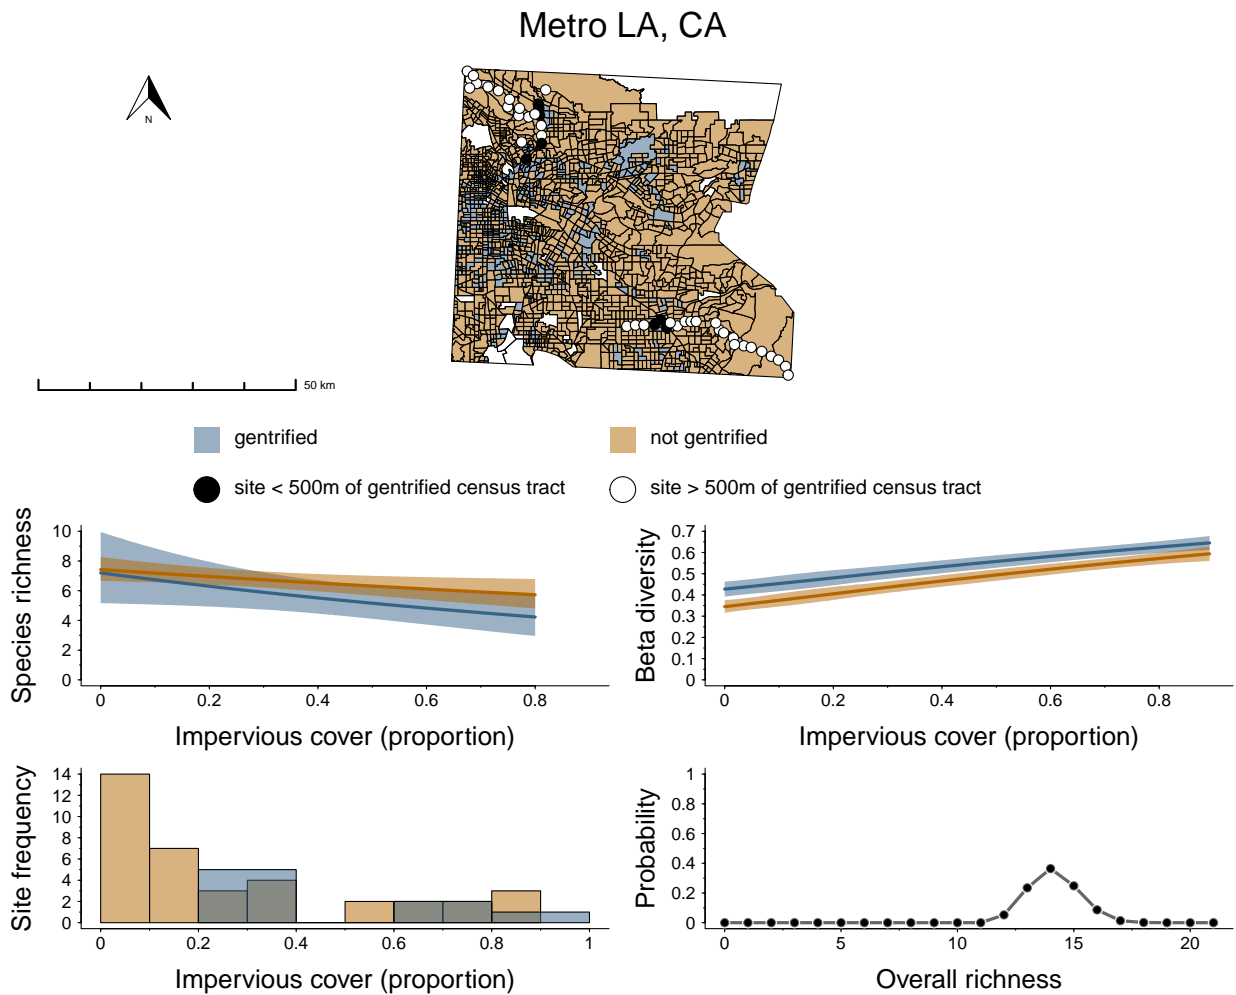

**Figure S13.** The distribution of gentrifying and non-gentrifying Census tracts for Metro LA, CA as well as the camera trap locations for this city. Below the map are city specific estimates for how alpha diversity (species richness) and beta diversity (Sørensen’s dissimilarity index) varies at gentrifying and non-gentrifying sites along a gradient of impervious cover. The lower left histogram shows the proportion of impervious cover at gentrifying and non-gentrifying camera trap locations for Metro LA, CA. Finally, the lower right plot shows the estimate for total species richness of medium to large mammals for the city (i.e., gamma diversity).

## Washington D.C.

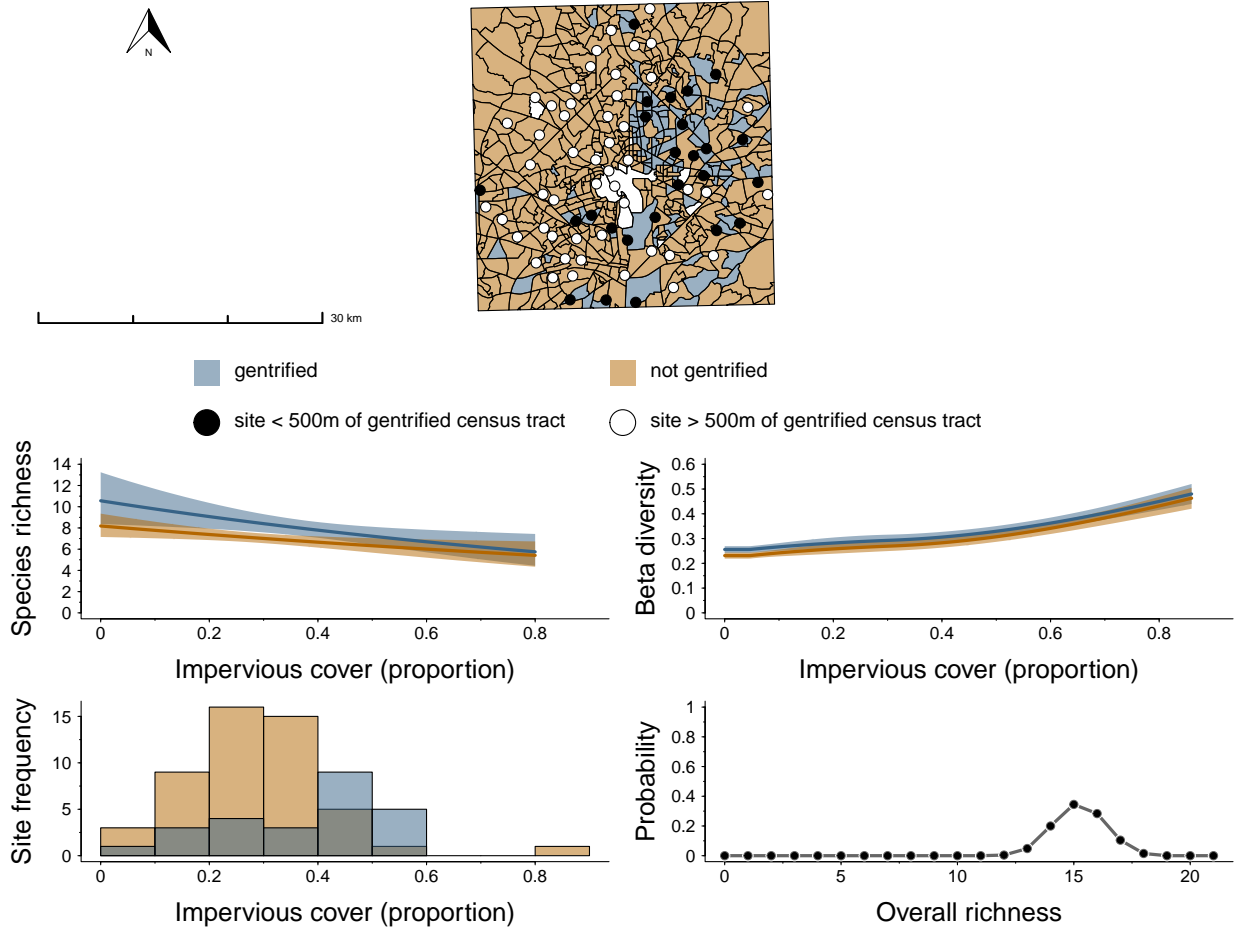

**Figure S14.** The distribution of gentrifying and non-gentrifying Census tracts for Washington D.C. as well as the camera trap locations for this city. Below the map are city specific estimates for how alpha diversity (species richness) and beta diversity (Sørensen’s dissimilarity index) varies at gentrifying and non-gentrifying sites along a gradient of impervious cover. The lower left histogram shows the proportion of impervious cover at gentrifying and non-gentrifying camera trap locations for Washington D.C.. Finally, the lower right plot shows the estimate for total species richness of medium to large mammals for the city (i.e., gamma diversity).

## Phoenix, AZ

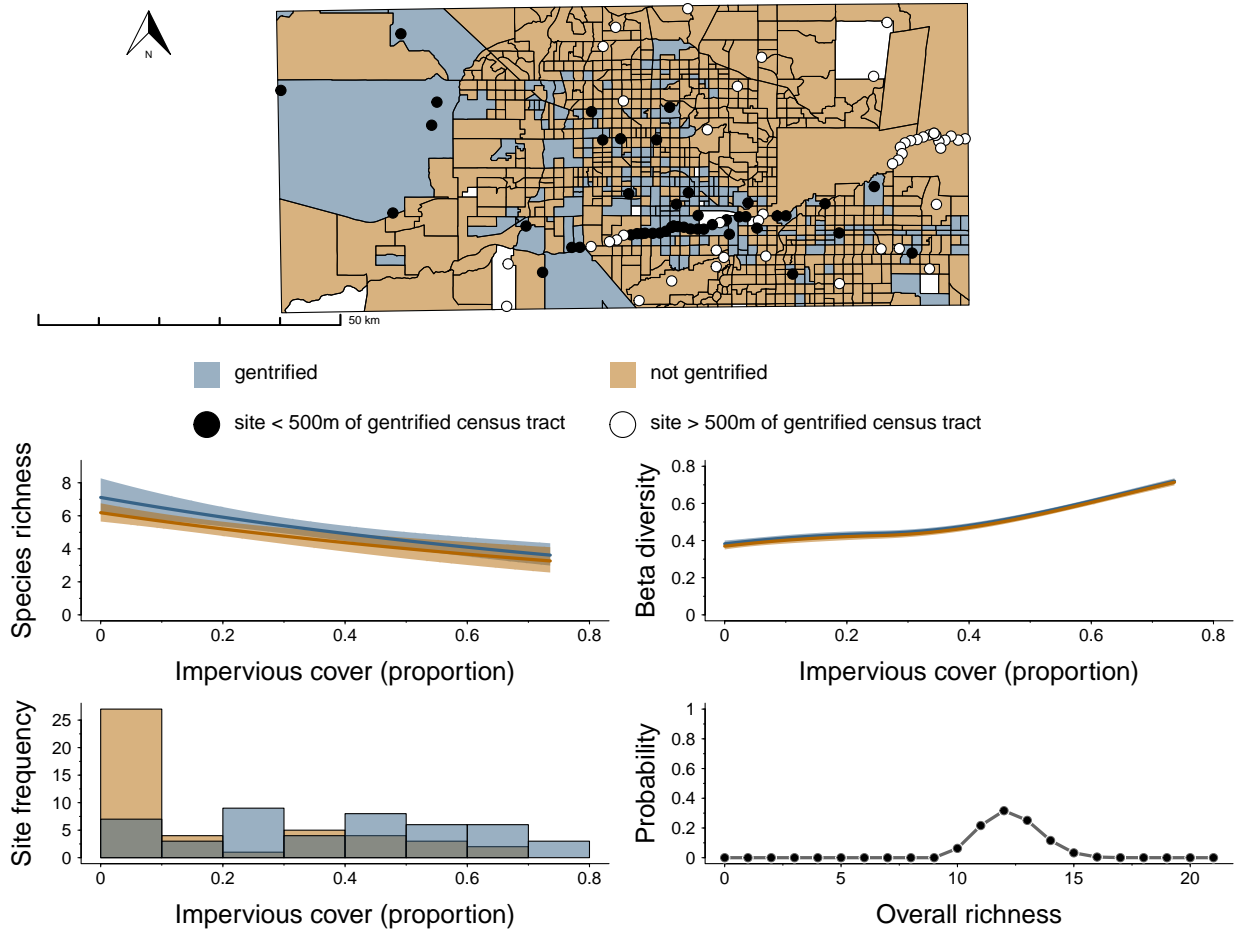

**Figure S15.** The distribution of gentrifying and non-gentrifying Census tracts for Phoenix, AZ as well as the camera trap locations for this city. Below the map are city specific estimates for how alpha diversity (species richness) and beta diversity (Sørensen’s dissimilarity index) varies at gentrifying and non-gentrifying sites along a gradient of impervious cover. The lower left histogram shows the proportion of impervious cover at gentrifying and non-gentrifying camera trap locations for Phoenix, AZ. Finally, the lower right plot shows the estimate for total species richness of medium to large mammals for the city (i.e., gamma diversity).

## Portland, Oregon

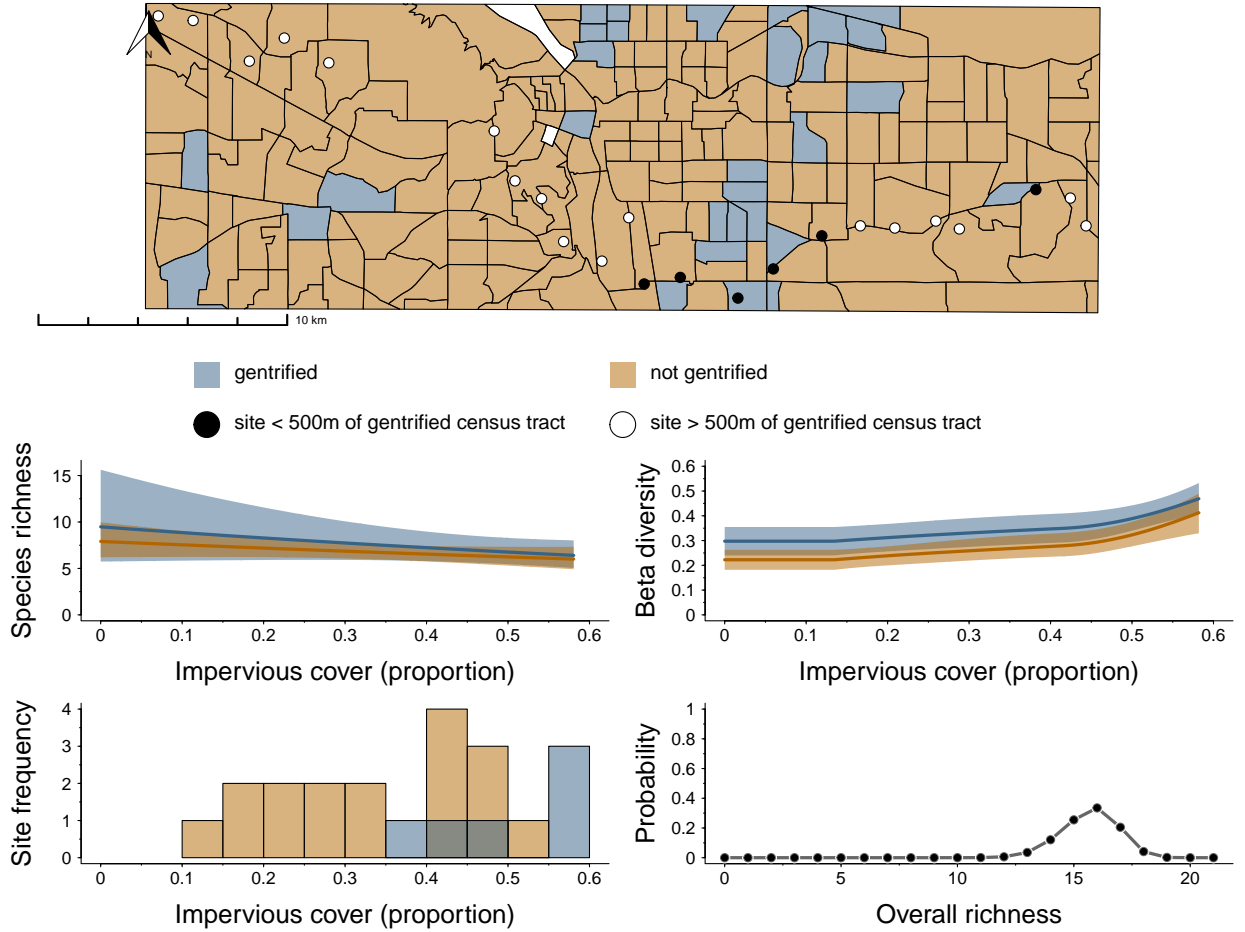

**Figure S16.** The distribution of gentrifying and non-gentrifying Census tracts for Portland, Oregon as well as the camera trap locations for this city. Below the map are city specific estimates for how alpha diversity (species richness) and beta diversity (Sørensen’s dissimilarity index) varies at gentrifying and non-gentrifying sites along a gradient of impervious cover. The lower left histogram shows the proportion of impervious cover at gentrifying and non-gentrifying camera trap locations for Portland, Oregon. Finally, the lower right plot shows the estimate for total species richness of medium to large mammals for the city (i.e., gamma diversity).

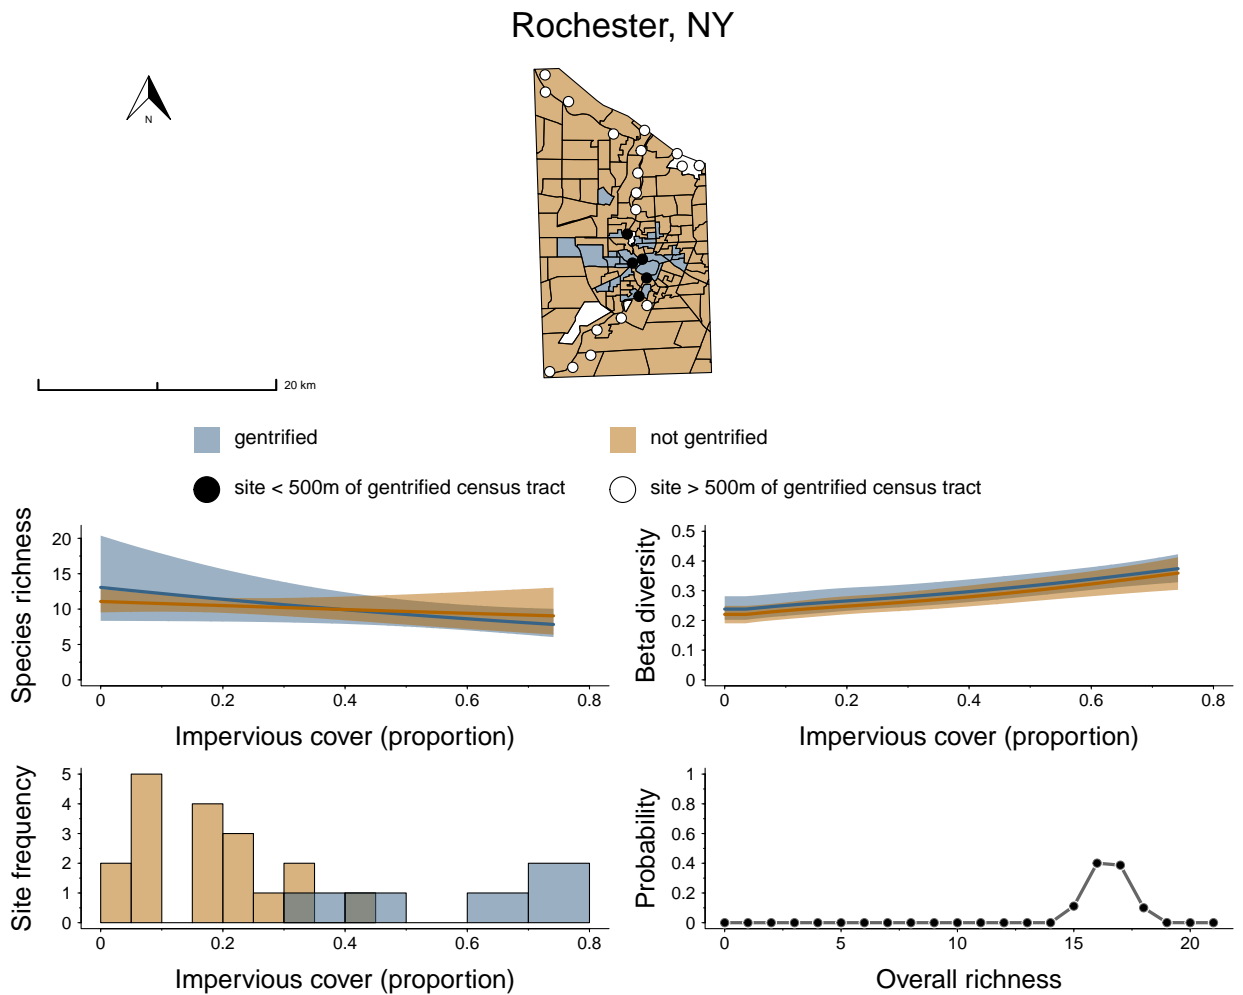

**Figure S17.** The distribution of gentrifying and non-gentrifying Census tracts for Rochester, NY as well as the camera trap locations for this city. Below the map are city specific estimates for how alpha diversity (species richness) and beta diversity (Sørensen’s dissimilarity index) varies at gentrifying and non-gentrifying sites along a gradient of impervious cover. The lower left histogram shows the proportion of impervious cover at gentrifying and non-gentrifying camera trap locations for Rochester, NY. Finally, the lower right plot shows the estimate for total species richness of medium to large mammals for the city (i.e., gamma diversity).

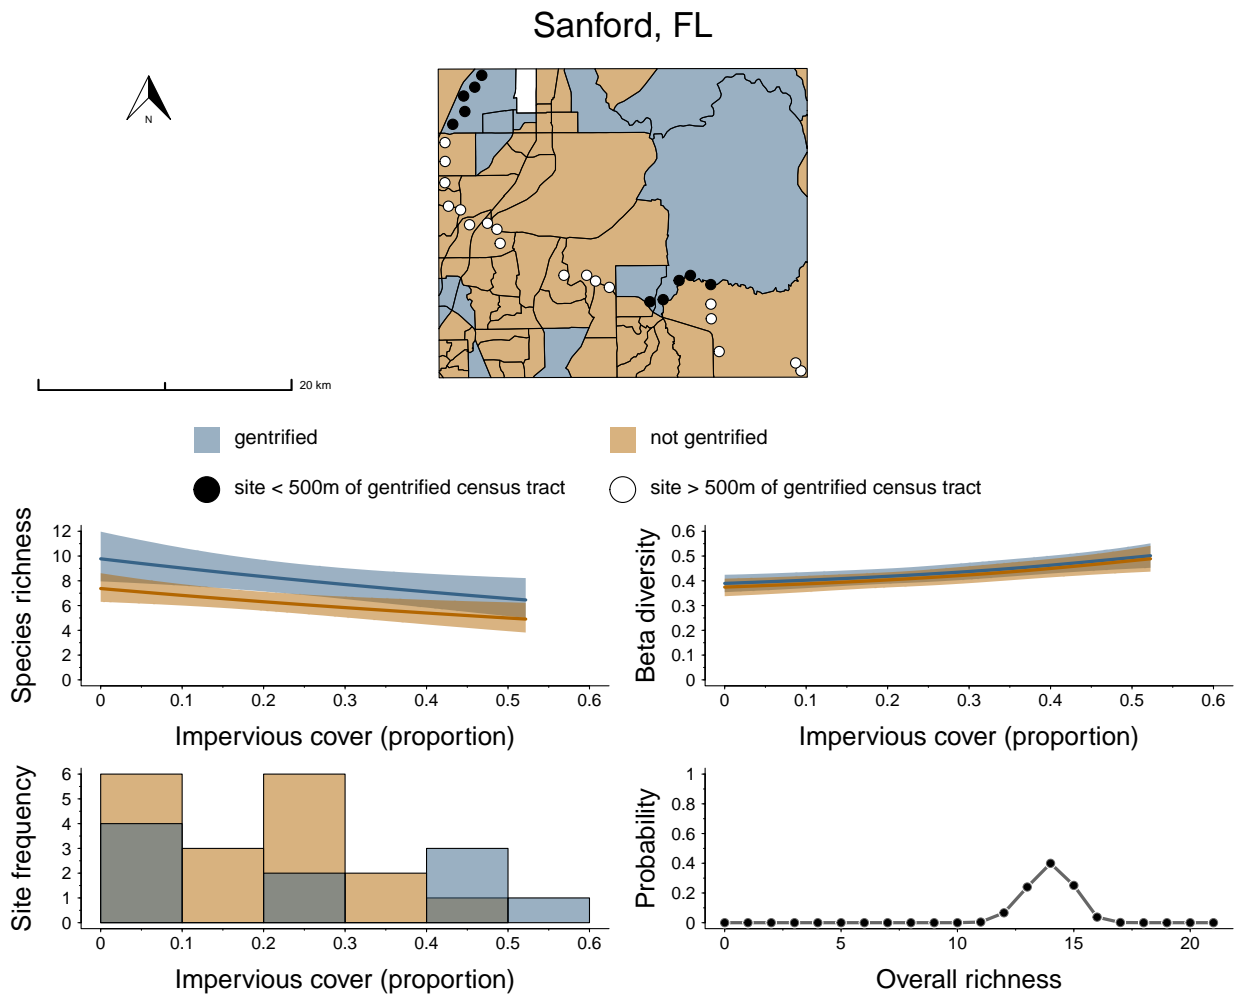

**Figure S18.** The distribution of gentrifying and non-gentrifying Census tracts for Sanford, FL as well as the camera trap locations for this city. Below the map are city specific estimates for how alpha diversity (species richness) and beta diversity (Sørensen’s dissimilarity index) varies at gentrifying and non-gentrifying sites along a gradient of impervious cover. The lower left histogram shows the proportion of impervious cover at gentrifying and non-gentrifying camera trap locations for Sanford, FL. Finally, the lower right plot shows the estimate for total species richness of medium to large mammals for the city (i.e., gamma diversity).

## Salt Lake City, UT

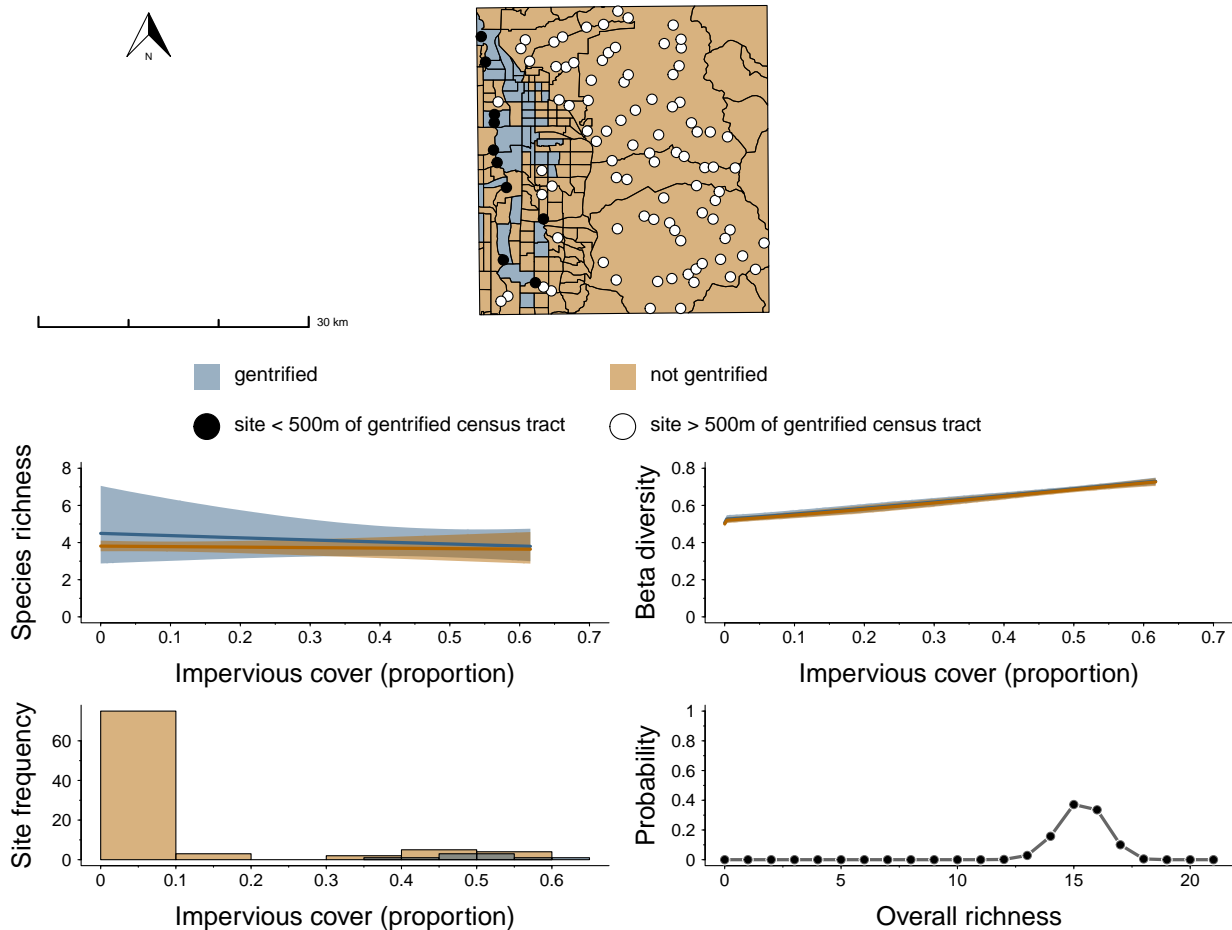

**Figure S19.** The distribution of gentrifying and non-gentrifying Census tracts for Salt Lake City, UT as well as the camera trap locations for this city. Below the map are city specific estimates for how alpha diversity (species richness) and beta diversity (Sørensen's dissimilarity index) varies at gentrifying and non-gentrifying sites along a gradient of impervious cover. The lower left histogram shows the proportion of impervious cover at gentrifying and non-gentrifying camera trap locations for Salt Lake City, UT. Finally, the lower right plot shows the estimate for total species richness of medium to large mammals for the city (i.e., gamma diversity).

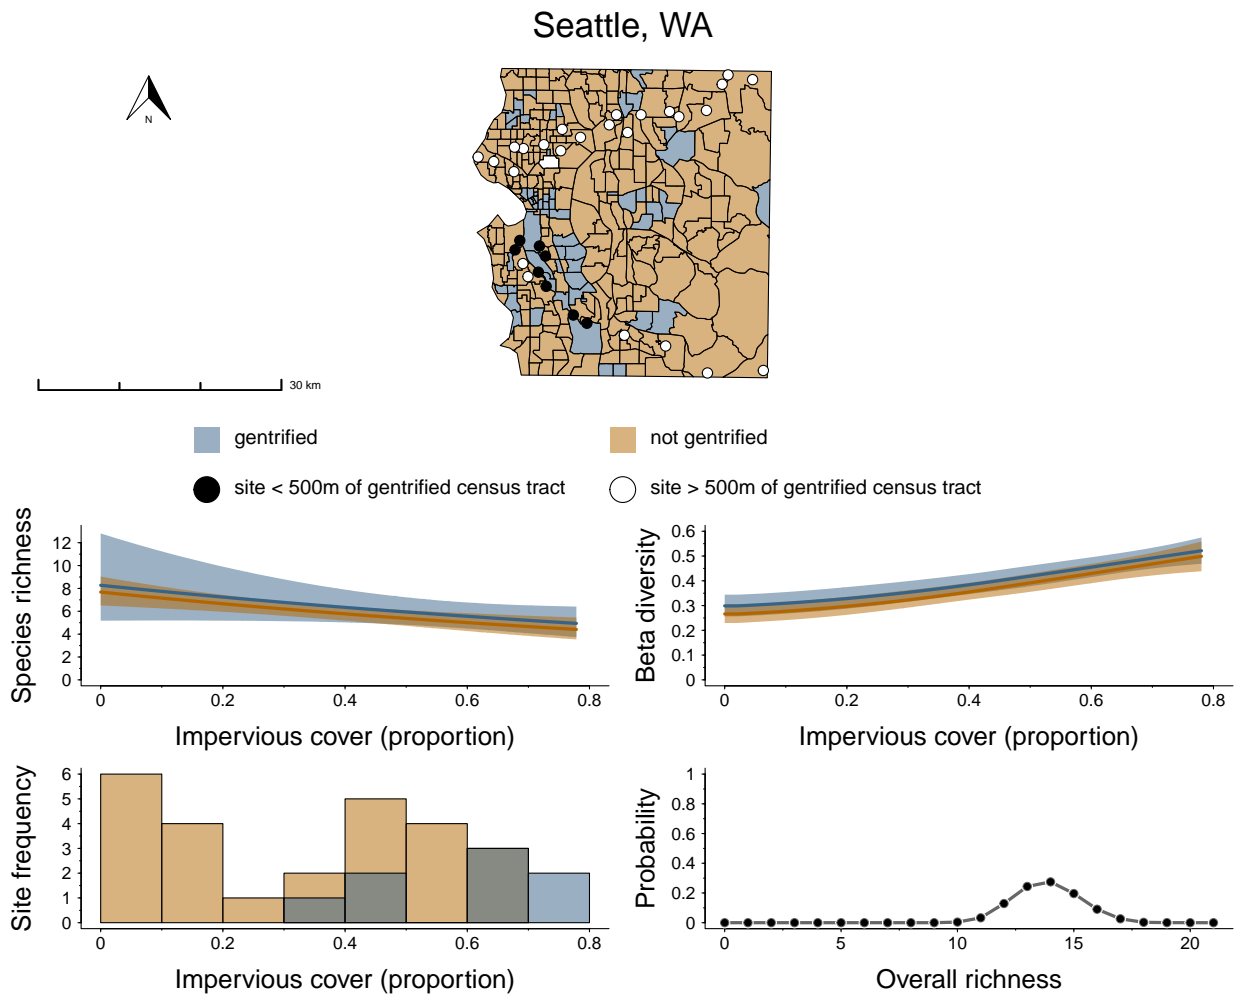

**Figure S20.** The distribution of gentrifying and non-gentrifying Census tracts for Seattle, WA as well as the camera trap locations for this city. Below the map are city specific estimates for how alpha diversity (species richness) and beta diversity (Sørensen’s dissimilarity index) varies at gentrifying and non-gentrifying sites along a gradient of impervious cover. The lower left histogram shows the proportion of impervious cover at gentrifying and non-gentrifying camera trap locations for Seattle, WA. Finally, the lower right plot shows the estimate for total species richness of medium to large mammals for the city (i.e., gamma diversity).



## Saint Louis, MO

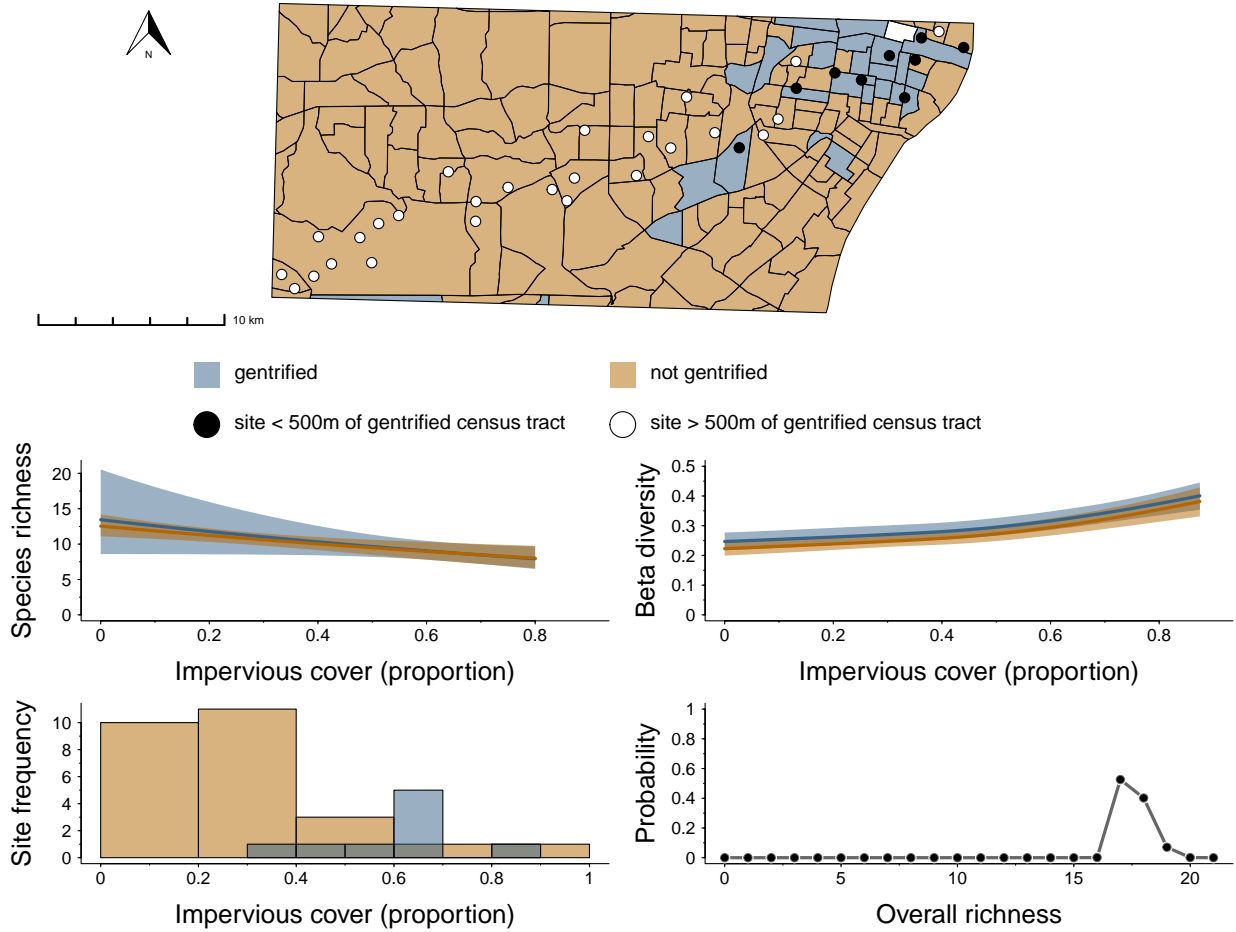

**Figure S21.** The distribution of gentrifying and non-gentrifying Census tracts for Saint Louis, MO as well as the camera trap locations for this city. Below the map are city specific estimates for how alpha diversity (species richness) and beta diversity (Sørensen’s dissimilarity index) varies at gentrifying and non-gentrifying sites along a gradient of impervious cover. The lower left histogram shows the proportion of impervious cover at gentrifying and non-gentrifying camera trap locations for Saint Louis, MO. Finally, the lower right plot shows the estimate for total species richness of medium to large mammals for the city (i.e., gamma diversity).

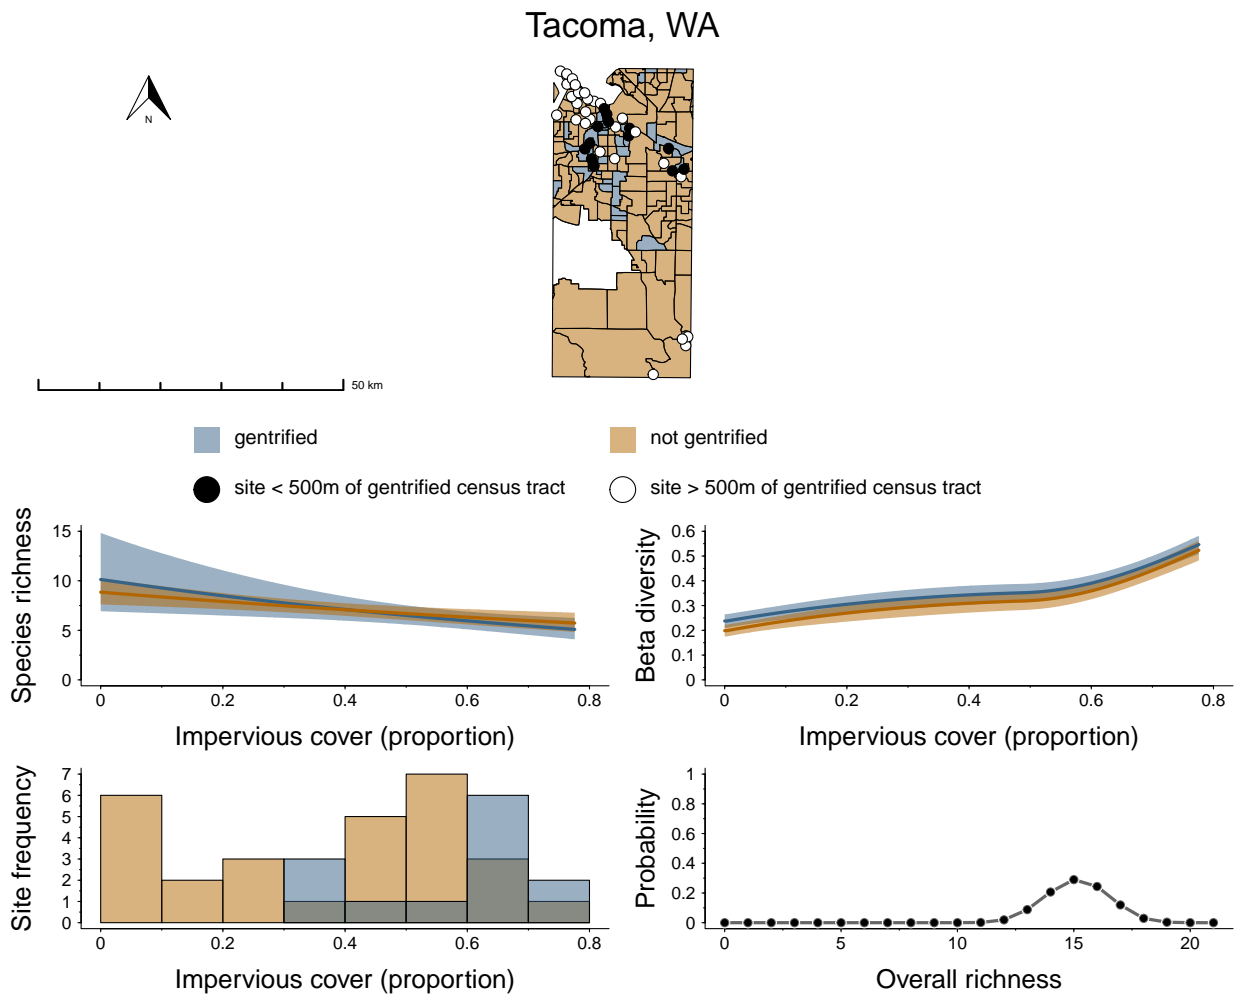

**Figure S22.** The distribution of gentrifying and non-gentrifying Census tracts for Tacoma, WA as well as the camera trap locations for this city. Below the map are city specific estimates for how alpha diversity (species richness) and beta diversity (Sørensen’s dissimilarity index) varies at gentrifying and non-gentrifying sites along a gradient of impervious cover. The lower left histogram shows the proportion of impervious cover at gentrifying and non-gentrifying camera trap locations for Tacoma, WA. Finally, the lower right plot shows the estimate for total species richness of medium to large mammals for the city (i.e., gamma diversity).

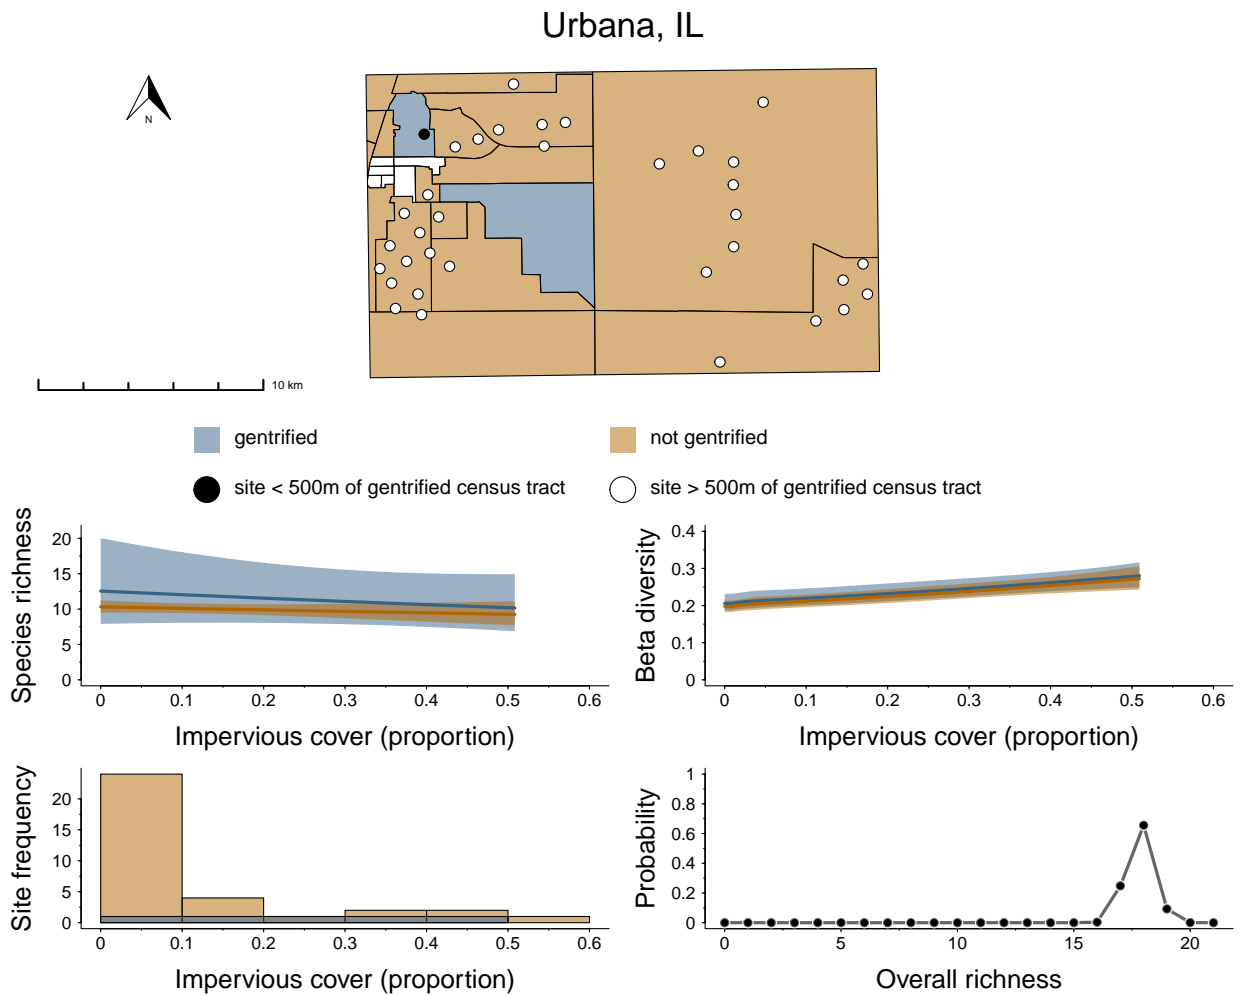

**Figure S23.** The distribution of gentrifying and non-gentrifying Census tracts for Urbana, IL as well as the camera trap locations for this city. Below the map are city specific estimates for how alpha diversity (species richness) and beta diversity (Sørensen’s dissimilarity index) varies at gentrifying and non-gentrifying sites along a gradient of impervious cover. The lower left histogram shows the proportion of impervious cover at gentrifying and non-gentrifying camera trap locations for Urbana, IL. Finally, the lower right plot shows the estimate for total species richness of medium to large mammals for the city (i.e., gamma diversity).

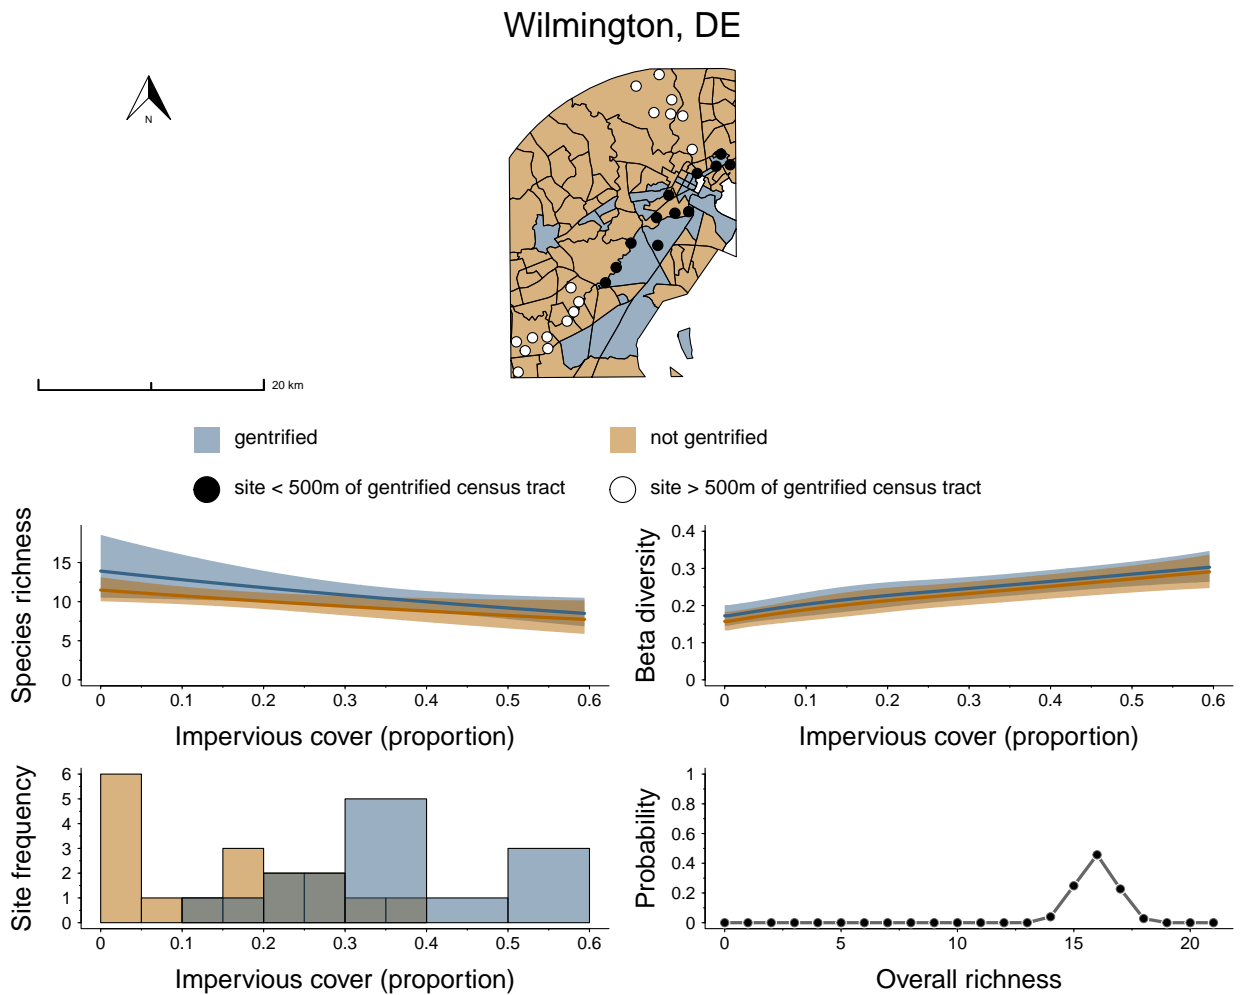

**Figure S24.** The distribution of gentrifying and non-gentrifying Census tracts for Wilmington, DE as well as the camera trap locations for this city. Below the map are city specific estimates for how alpha diversity (species richness) and beta diversity (Sørensen’s dissimilarity index) varies at gentrifying and non-gentrifying sites along a gradient of impervious cover. The lower left histogram shows the proportion of impervious cover at gentrifying and non-gentrifying camera trap locations for Wilmington, DE. Finally, the lower right plot shows the estimate for total species richness of medium to large mammals for the city (i.e., gamma diversity).

## Alpha diversity model estimates

**Table S11:** The among-city average estimates from the alpha diversity model.

| Parameter  | CI(0.025) | CI(0.05) | Estimate | CI(0.95) | CI(0.975) |
|------------|-----------|----------|----------|----------|-----------|
| intercept  | 1.98      | 2.01     | 2.16     | 2.30     | 2.33      |
| gent       | -0.01     | 0.02     | 0.17     | 0.33     | 0.36      |
| imp        | -0.71     | -0.67    | -0.49    | -0.31    | -0.27     |
| gent X imp | -0.53     | -0.48    | -0.22    | 0.04     | 0.09      |

**Table S12:** The estimated standard deviation of city-specific estimates from the among-city means from the alpha diversity model.

| Parameter  | CI(0.025) | CI(0.05) | Estimate | CI(0.95) | CI(0.975) |
|------------|-----------|----------|----------|----------|-----------|
| intercept  | 0.31      | 0.32     | 0.40     | 0.53     | 0.56      |
| gent       | 0.27      | 0.28     | 0.35     | 0.46     | 0.49      |
| imp        | 0.32      | 0.34     | 0.44     | 0.59     | 0.63      |
| gent X imp | 0.33      | 0.35     | 0.47     | 0.65     | 0.70      |

**Table S13:** City specific-estimates from the alpha diversity model.

| City             | Parameter  | CI(0.025) | CI(0.05) | Estimate | CI(0.95) | CI(0.975) |
|------------------|------------|-----------|----------|----------|----------|-----------|
| Athens, GA       | intercept  | 2.02      | 2.05     | 2.16     | 2.28     | 2.30      |
|                  | gent       | -0.09     | -0.04    | 0.24     | 0.51     | 0.57      |
|                  | imp        | -1.29     | -1.21    | -0.78    | -0.35    | -0.27     |
|                  | gent X imp | -0.83     | -0.69    | 0.02     | 0.79     | 0.96      |
| Bay Area, CA     | intercept  | 1.85      | 1.88     | 2.01     | 2.14     | 2.17      |
|                  | gent       | -0.29     | -0.21    | 0.15     | 0.52     | 0.59      |
|                  | imp        | -1.01     | -0.95    | -0.68    | -0.40    | -0.35     |
|                  | gent X imp | -1.01     | -0.89    | -0.29    | 0.30     | 0.42      |
| Boston, MA       | intercept  | 2.02      | 2.05     | 2.20     | 2.35     | 2.38      |
|                  | gent       | -0.10     | -0.03    | 0.28     | 0.60     | 0.66      |
|                  | imp        | -0.82     | -0.75    | -0.34    | 0.08     | 0.16      |
|                  | gent X imp | -0.99     | -0.88    | -0.28    | 0.31     | 0.43      |
| Chicago, IL      | intercept  | 2.32      | 2.34     | 2.43     | 2.53     | 2.55      |
|                  | gent       | 0.11      | 0.15     | 0.34     | 0.54     | 0.59      |
|                  | imp        | -0.94     | -0.90    | -0.69    | -0.48    | -0.44     |
|                  | gent X imp | -0.94     | -0.87    | -0.51    | -0.17    | -0.09     |
| Denver, CO       | intercept  | 1.73      | 1.77     | 1.94     | 2.12     | 2.15      |
|                  | gent       | -0.07     | -0.02    | 0.27     | 0.56     | 0.61      |
|                  | imp        | -0.83     | -0.75    | -0.35    | 0.06     | 0.14      |
|                  | gent X imp | -0.95     | -0.83    | -0.25    | 0.34     | 0.46      |
| Houston, TX      | intercept  | 2.18      | 2.21     | 2.38     | 2.55     | 2.58      |
|                  | gent       | -0.25     | -0.18    | 0.15     | 0.47     | 0.53      |
|                  | imp        | -1.31     | -1.24    | -0.87    | -0.50    | -0.43     |
|                  | gent X imp | -0.88     | -0.77    | -0.21    | 0.34     | 0.45      |
| Indianapolis, IN | intercept  | 2.22      | 2.25     | 2.37     | 2.49     | 2.51      |
|                  | gent       | -0.19     | -0.15    | 0.10     | 0.34     | 0.39      |
|                  | imp        | -0.52     | -0.46    | -0.11    | 0.23     | 0.30      |
|                  | gent X imp | -0.75     | -0.65    | -0.14    | 0.37     | 0.48      |

**Table S13:** City specific-estimates from the alpha diversity model. *(continued)*

| City               | Parameter  | CI(0.025) | CI(0.05) | Estimate | CI(0.95) | CI(0.975) |
|--------------------|------------|-----------|----------|----------|----------|-----------|
| Iowa City, IA      | intercept  | 2.43      | 2.44     | 2.53     | 2.61     | 2.63      |
|                    | gent       | -0.20     | -0.15    | 0.08     | 0.31     | 0.36      |
|                    | imp        | -0.87     | -0.80    | -0.46    | -0.11    | -0.05     |
|                    | gent X imp | -0.90     | -0.78    | -0.16    | 0.46     | 0.59      |
| Jackson, MS        | intercept  | 1.83      | 1.85     | 1.97     | 2.09     | 2.12      |
|                    | gent       | 0.01      | 0.06     | 0.31     | 0.57     | 0.63      |
|                    | imp        | -0.69     | -0.62    | -0.24    | 0.14     | 0.21      |
|                    | gent X imp | -1.36     | -1.23    | -0.61    | -0.02    | 0.08      |
| Little Rock, AR    | intercept  | 2.34      | 2.36     | 2.45     | 2.53     | 2.55      |
|                    | gent       | -0.13     | -0.07    | 0.28     | 0.62     | 0.69      |
|                    | imp        | -0.66     | -0.59    | -0.24    | 0.13     | 0.20      |
|                    | gent X imp | -1.12     | -1.00    | -0.39    | 0.22     | 0.33      |
| Madison, WI        | intercept  | 1.76      | 1.80     | 2.02     | 2.23     | 2.27      |
|                    | gent       | -0.38     | -0.31    | 0.01     | 0.33     | 0.39      |
|                    | imp        | -1.49     | -1.38    | -0.83    | -0.32    | -0.21     |
|                    | gent X imp | -1.02     | -0.88    | -0.18    | 0.54     | 0.68      |
| Metro LA, CA       | intercept  | 1.90      | 1.91     | 2.00     | 2.09     | 2.11      |
|                    | gent       | -0.36     | -0.31    | -0.03    | 0.24     | 0.29      |
|                    | imp        | -0.60     | -0.56    | -0.32    | -0.09    | -0.05     |
|                    | gent X imp | -1.01     | -0.89    | -0.34    | 0.20     | 0.30      |
| Washington D.C.    | intercept  | 1.97      | 1.99     | 2.10     | 2.21     | 2.23      |
|                    | gent       | 0.02      | 0.06     | 0.26     | 0.46     | 0.50      |
|                    | imp        | -0.93     | -0.86    | -0.52    | -0.18    | -0.11     |
|                    | gent X imp | -0.87     | -0.77    | -0.26    | 0.25     | 0.35      |
| Phoenix, AZ        | intercept  | 1.73      | 1.75     | 1.82     | 1.90     | 1.91      |
|                    | gent       | -0.03     | -0.01    | 0.14     | 0.28     | 0.31      |
|                    | imp        | -1.23     | -1.18    | -0.87    | -0.58    | -0.52     |
|                    | gent X imp | -0.53     | -0.45    | -0.05    | 0.36     | 0.45      |
| Portland, Oregon   | intercept  | 1.83      | 1.87     | 2.07     | 2.27     | 2.30      |
|                    | gent       | -0.26     | -0.18    | 0.18     | 0.54     | 0.61      |
|                    | imp        | -1.11     | -1.01    | -0.48    | 0.06     | 0.16      |
|                    | gent X imp | -1.02     | -0.88    | -0.20    | 0.48     | 0.62      |
| Rochester, NY      | intercept  | 2.26      | 2.28     | 2.41     | 2.53     | 2.55      |
|                    | gent       | -0.26     | -0.19    | 0.16     | 0.52     | 0.58      |
|                    | imp        | -0.87     | -0.78    | -0.28    | 0.24     | 0.34      |
|                    | gent X imp | -1.16     | -1.03    | -0.41    | 0.19     | 0.31      |
| Sanford, FL        | intercept  | 1.84      | 1.86     | 2.00     | 2.13     | 2.15      |
|                    | gent       | 0.05      | 0.09     | 0.28     | 0.48     | 0.52      |
|                    | imp        | -1.40     | -1.30    | -0.78    | -0.29    | -0.19     |
|                    | gent X imp | -0.71     | -0.60    | -0.02    | 0.59     | 0.71      |
| Salt Lake City, UT | intercept  | 1.26      | 1.27     | 1.34     | 1.40     | 1.41      |
|                    | gent       | -0.27     | -0.20    | 0.17     | 0.52     | 0.59      |
|                    | imp        | -0.49     | -0.42    | -0.07    | 0.26     | 0.32      |
|                    | gent X imp | -1.00     | -0.87    | -0.20    | 0.48     | 0.62      |
| Seattle, WA        | intercept  | 1.87      | 1.90     | 2.04     | 2.17     | 2.20      |
|                    | gent       | -0.37     | -0.29    | 0.08     | 0.43     | 0.49      |
|                    | imp        | -1.13     | -1.06    | -0.71    | -0.37    | -0.30     |
|                    | gent X imp | -0.65     | -0.54    | 0.04     | 0.66     | 0.80      |
| Saint Louis, MO    | intercept  | 2.40      | 2.42     | 2.53     | 2.63     | 2.65      |
|                    | gent       | -0.37     | -0.30    | 0.06     | 0.42     | 0.49      |

**Table S13:** City specific-estimates from the alpha diversity model. *(continued)*

| City           | Parameter  | CI(0.025) | CI(0.05) | Estimate | CI(0.95) | CI(0.975) |
|----------------|------------|-----------|----------|----------|----------|-----------|
| Tacoma, WA     | imp        | -0.90     | -0.84    | -0.56    | -0.26    | -0.21     |
|                | gent X imp | -0.77     | -0.66    | -0.09    | 0.48     | 0.60      |
|                | intercept  | 2.03      | 2.05     | 2.18     | 2.30     | 2.32      |
| Urbana, IL     | gent       | -0.24     | -0.18    | 0.13     | 0.44     | 0.50      |
|                | imp        | -0.89     | -0.84    | -0.55    | -0.27    | -0.22     |
|                | gent X imp | -0.96     | -0.86    | -0.33    | 0.20     | 0.31      |
| Wilmington, DE | intercept  | 2.25      | 2.26     | 2.33     | 2.40     | 2.42      |
|                | gent       | -0.26     | -0.19    | 0.20     | 0.57     | 0.65      |
|                | imp        | -0.65     | -0.58    | -0.22    | 0.15     | 0.21      |
| Wilmington, DE | gent X imp | -1.11     | -0.95    | -0.20    | 0.55     | 0.72      |
|                | intercept  | 2.31      | 2.33     | 2.44     | 2.55     | 2.57      |
|                | gent       | -0.08     | -0.04    | 0.19     | 0.42     | 0.47      |
| Wilmington, DE | imp        | -1.25     | -1.16    | -0.68    | -0.21    | -0.12     |
|                | gent X imp | -0.87     | -0.75    | -0.16    | 0.44     | 0.56      |

## Beta diversity model estimates

**Table S14:** The among-city average estimates from the beta diversity model. Note that the two continuous covariates (geographic distance and impervious cover) have been transformed with I-splines, so each covariate has multiple slope terms.

| Parameter | Spline | CI(0.025) | CI(0.05) | Estimate | CI(0.95) | CI(0.975) |
|-----------|--------|-----------|----------|----------|----------|-----------|
| intercept |        | 0         | 0.01     | 0.06     | 0.20     | 0.23      |
| distance  | 1      | 0         | 0.00     | 0.01     | 0.06     | 0.07      |
|           | 2      | 0         | 0.00     | 0.01     | 0.05     | 0.07      |
|           | 3      | 0         | 0.00     | 0.01     | 0.06     | 0.07      |
| imp       | 1      | 0         | 0.00     | 0.01     | 0.06     | 0.07      |
|           | 2      | 0         | 0.00     | 0.02     | 0.07     | 0.08      |
|           | 3      | 0         | 0.00     | 0.03     | 0.11     | 0.13      |
| gent      |        | 0         | 0.00     | 0.01     | 0.05     | 0.07      |



**Table S15:** The estimated standard deviation of city-specific estimates from the among-city means from the beta diversity model. Note that the two continuous covariates (geographic distance and impervious cover) have been transformed with I-splines, so each covariate has multiple slope terms.

| Parameter | Spline | CI(0.025) | CI(0.05) | Estimate | CI(0.95) | CI(0.975) |
|-----------|--------|-----------|----------|----------|----------|-----------|
| intercept |        | 0.29      | 0.31     | 0.39     | 0.51     | 0.54      |
| distance  | 1      | 0.23      | 0.24     | 0.30     | 0.39     | 0.41      |
|           | 2      | 0.23      | 0.24     | 0.30     | 0.39     | 0.41      |
|           | 3      | 0.23      | 0.24     | 0.30     | 0.39     | 0.41      |
| imp       | 1      | 0.24      | 0.25     | 0.31     | 0.40     | 0.42      |
|           | 2      | 0.24      | 0.25     | 0.31     | 0.40     | 0.42      |
|           | 3      | 0.28      | 0.29     | 0.36     | 0.47     | 0.49      |
| gent      |        | 0.23      | 0.24     | 0.30     | 0.38     | 0.41      |

**Table S16:** City specific-estimates from the beta diversity model. Note that the two continuous covariates (geographic distance and impervious cover) have been transformed with I-splines, so each covariate has multiple slope terms.

| City             | Spline       | Parameter | CI(0.025) | CI(0.05) | Estimate | CI(0.95) | CI(0.975) |      |
|------------------|--------------|-----------|-----------|----------|----------|----------|-----------|------|
| Athens, GA       | intercept    |           | 0.24      | 0.25     | 0.29     | 0.32     | 0.33      |      |
|                  | distance     | 1         | 0.00      | 0.00     | 0.02     | 0.07     | 0.08      |      |
|                  |              | 2         | 0.00      | 0.00     | 0.01     | 0.05     | 0.06      |      |
|                  |              | 3         | 0.00      | 0.00     | 0.02     | 0.09     | 0.10      |      |
|                  | imp          | 1         | 0.00      | 0.00     | 0.01     | 0.04     | 0.05      |      |
|                  |              | 2         | 0.00      | 0.00     | 0.02     | 0.07     | 0.08      |      |
|                  |              | 3         | 0.07      | 0.09     | 0.17     | 0.26     | 0.27      |      |
|                  | Bay Area, CA | gent      |           | 0.00     | 0.00     | 0.01     | 0.03      | 0.04 |
|                  |              | intercept |           | 0.13     | 0.14     | 0.20     | 0.26      | 0.27 |
| distance         |              | 1         | 0.07      | 0.08     | 0.18     | 0.27     | 0.29      |      |
|                  |              | 2         | 0.16      | 0.17     | 0.25     | 0.32     | 0.34      |      |
|                  |              | 3         | 0.00      | 0.00     | 0.03     | 0.10     | 0.12      |      |
| imp              |              | 1         | 0.15      | 0.17     | 0.24     | 0.31     | 0.33      |      |
|                  |              | 2         | 0.00      | 0.00     | 0.03     | 0.09     | 0.11      |      |
|                  |              | 3         | 0.12      | 0.14     | 0.21     | 0.29     | 0.31      |      |
| Boston, MA       |              | gent      |           | 0.01     | 0.01     | 0.06     | 0.10      | 0.11 |
|                  | intercept    |           | 0.20      | 0.21     | 0.26     | 0.30     | 0.30      |      |
|                  | distance     | 1         | 0.00      | 0.00     | 0.03     | 0.09     | 0.10      |      |
|                  |              | 2         | 0.00      | 0.00     | 0.02     | 0.07     | 0.08      |      |
|                  |              | 3         | 0.00      | 0.00     | 0.05     | 0.14     | 0.17      |      |
|                  | imp          | 1         | 0.00      | 0.00     | 0.04     | 0.10     | 0.12      |      |
|                  |              | 2         | 0.00      | 0.00     | 0.03     | 0.10     | 0.11      |      |
|                  |              | 3         | 0.01      | 0.01     | 0.07     | 0.15     | 0.17      |      |
|                  | Chicago, IL  | gent      |           | 0.00     | 0.00     | 0.01     | 0.05      | 0.05 |
| intercept        |              |           | 0.23      | 0.24     | 0.25     | 0.26     | 0.27      |      |
| distance         |              | 1         | 0.00      | 0.00     | 0.01     | 0.02     | 0.03      |      |
|                  |              | 2         | 0.00      | 0.00     | 0.01     | 0.02     | 0.03      |      |
|                  |              | 3         | 0.01      | 0.02     | 0.06     | 0.10     | 0.11      |      |
| imp              |              | 1         | 0.00      | 0.00     | 0.01     | 0.02     | 0.03      |      |
|                  |              | 2         | 0.07      | 0.07     | 0.10     | 0.13     | 0.13      |      |
|                  |              | 3         | 0.21      | 0.21     | 0.24     | 0.26     | 0.27      |      |
| Denver, CO       |              | gent      |           | 0.00     | 0.00     | 0.01     | 0.02      | 0.03 |
|                  | intercept    |           | 0.26      | 0.27     | 0.32     | 0.36     | 0.36      |      |
|                  | distance     | 1         | 0.00      | 0.00     | 0.03     | 0.09     | 0.11      |      |
|                  |              | 2         | 0.00      | 0.00     | 0.02     | 0.07     | 0.08      |      |
|                  |              | 3         | 0.00      | 0.00     | 0.04     | 0.13     | 0.16      |      |
|                  | imp          | 1         | 0.22      | 0.23     | 0.33     | 0.41     | 0.43      |      |
|                  |              | 2         | 0.00      | 0.00     | 0.05     | 0.14     | 0.15      |      |
|                  |              | 3         | 0.00      | 0.00     | 0.02     | 0.07     | 0.09      |      |
|                  | Houston, TX  | gent      |           | 0.00     | 0.00     | 0.03     | 0.07      | 0.07 |
| intercept        |              |           | 0.17      | 0.18     | 0.22     | 0.26     | 0.27      |      |
| distance         |              | 1         | 0.00      | 0.00     | 0.01     | 0.05     | 0.06      |      |
|                  |              | 2         | 0.00      | 0.00     | 0.01     | 0.03     | 0.04      |      |
|                  |              | 3         | 0.00      | 0.00     | 0.02     | 0.07     | 0.08      |      |
| imp              |              | 1         | 0.00      | 0.00     | 0.01     | 0.03     | 0.04      |      |
|                  |              | 2         | 0.07      | 0.09     | 0.17     | 0.25     | 0.26      |      |
|                  |              | 3         | 0.01      | 0.02     | 0.09     | 0.16     | 0.18      |      |
| Indianapolis, IN |              | gent      |           | 0.00     | 0.00     | 0.03     | 0.08      | 0.09 |
|                  | intercept    |           | 0.17      | 0.17     | 0.20     | 0.23     | 0.23      |      |

**Table S16:** City specific-estimates from the beta diversity model. Note that the two continuous covariates (geographic distance and impervious cover) have been transformed with I-splines, so each covariate has multiple slope terms. (continued)

| City           | Spline         | Parameter | CI(0.025) | CI(0.05) | Estimate | CI(0.95) | CI(0.975) |      |
|----------------|----------------|-----------|-----------|----------|----------|----------|-----------|------|
| Iowa City, IA  | distance       | 1         | 0.00      | 0.00     | 0.02     | 0.06     | 0.07      |      |
|                |                | 2         | 0.00      | 0.00     | 0.01     | 0.04     | 0.04      |      |
|                |                | 3         | 0.00      | 0.00     | 0.04     | 0.10     | 0.12      |      |
|                | imp            | 1         | 0.00      | 0.00     | 0.01     | 0.03     | 0.04      |      |
|                |                | 2         | 0.00      | 0.00     | 0.03     | 0.07     | 0.08      |      |
|                |                | 3         | 0.00      | 0.00     | 0.02     | 0.05     | 0.06      |      |
|                | gent intercept |           |           | 0.00     | 0.00     | 0.02     | 0.04      | 0.04 |
|                |                |           |           | 0.08     | 0.09     | 0.11     | 0.14      | 0.14 |
|                |                |           |           |          |          |          |           |      |
|                | distance       | 1         | 0.00      | 0.00     | 0.02     | 0.06     | 0.06      |      |
|                |                | 2         | 0.00      | 0.00     | 0.01     | 0.04     | 0.04      |      |
|                |                | 3         | 0.00      | 0.00     | 0.02     | 0.07     | 0.08      |      |
|                | imp            | 1         | 0.00      | 0.00     | 0.01     | 0.04     | 0.04      |      |
|                |                | 2         | 0.00      | 0.00     | 0.02     | 0.06     | 0.07      |      |
|                |                | 3         | 0.03      | 0.04     | 0.09     | 0.13     | 0.14      |      |
| gent intercept |                |           | 0.00      | 0.00     | 0.02     | 0.04     | 0.04      |      |
|                |                |           | 0.36      | 0.37     | 0.41     | 0.46     | 0.46      |      |
|                |                |           |           |          |          |          |           |      |
| distance       | 1              | 0.00      | 0.00      | 0.03     | 0.09     | 0.11     |           |      |
|                | 2              | 0.00      | 0.01      | 0.06     | 0.13     | 0.14     |           |      |
|                | 3              | 0.00      | 0.01      | 0.08     | 0.23     | 0.26     |           |      |
| imp            | 1              | 0.00      | 0.00      | 0.01     | 0.02     | 0.03     |           |      |
|                | 2              | 0.00      | 0.01      | 0.05     | 0.12     | 0.13     |           |      |
|                | 3              | 0.01      | 0.01      | 0.07     | 0.15     | 0.17     |           |      |
| gent intercept |                |           | 0.03      | 0.04     | 0.07     | 0.11     | 0.12      |      |
|                |                |           | 0.14      | 0.14     | 0.17     | 0.19     | 0.20      |      |
|                |                |           |           |          |          |          |           |      |
| distance       | 1              | 0.00      | 0.00      | 0.02     | 0.05     | 0.06     |           |      |
|                | 2              | 0.00      | 0.00      | 0.01     | 0.04     | 0.04     |           |      |
|                | 3              | 0.00      | 0.00      | 0.03     | 0.10     | 0.11     |           |      |
| imp            | 1              | 0.00      | 0.00      | 0.02     | 0.05     | 0.05     |           |      |
|                | 2              | 0.01      | 0.01      | 0.07     | 0.13     | 0.14     |           |      |
|                | 3              | 0.03      | 0.04      | 0.11     | 0.19     | 0.20     |           |      |
| gent intercept |                |           | 0.00      | 0.00     | 0.01     | 0.05     | 0.05      |      |
|                |                |           | 0.30      | 0.31     | 0.39     | 0.47     | 0.48      |      |
|                |                |           |           |          |          |          |           |      |
| distance       | 1              | 0.00      | 0.01      | 0.07     | 0.18     | 0.20     |           |      |
|                | 2              | 0.00      | 0.01      | 0.08     | 0.19     | 0.22     |           |      |
|                | 3              | 0.00      | 0.01      | 0.07     | 0.22     | 0.26     |           |      |
| imp            | 1              | 0.00      | 0.00      | 0.03     | 0.10     | 0.12     |           |      |
|                | 2              | 0.00      | 0.00      | 0.05     | 0.15     | 0.17     |           |      |
|                | 3              | 0.00      | 0.00      | 0.06     | 0.18     | 0.21     |           |      |
| gent intercept |                |           | 0.00      | 0.00     | 0.02     | 0.08     | 0.09      |      |
|                |                |           | 0.33      | 0.34     | 0.38     | 0.41     | 0.42      |      |
|                |                |           |           |          |          |          |           |      |
| distance       | 1              | 0.00      | 0.00      | 0.03     | 0.09     | 0.10     |           |      |
|                | 2              | 0.00      | 0.00      | 0.01     | 0.05     | 0.06     |           |      |
|                | 3              | 0.00      | 0.00      | 0.02     | 0.09     | 0.10     |           |      |
| imp            | 1              | 0.00      | 0.01      | 0.05     | 0.11     | 0.12     |           |      |
|                | 2              | 0.11      | 0.13      | 0.24     | 0.34     | 0.35     |           |      |
|                | 3              | 0.06      | 0.08      | 0.19     | 0.30     | 0.32     |           |      |
| gent intercept |                |           | 0.08      | 0.09     | 0.13     | 0.18     | 0.19      |      |
|                |                |           | 0.18      | 0.18     | 0.21     | 0.24     | 0.25      |      |

**Table S16:** City specific-estimates from the beta diversity model. Note that the two continuous covariates (geographic distance and impervious cover) have been transformed with I-splines, so each covariate has multiple slope terms. (continued)

| City               | Spline           | Parameter      | CI(0.025) | CI(0.05) | Estimate | CI(0.95) | CI(0.975) |      |
|--------------------|------------------|----------------|-----------|----------|----------|----------|-----------|------|
| Phoenix, AZ        | distance         | 1              | 0.01      | 0.01     | 0.04     | 0.08     | 0.08      |      |
|                    |                  | 2              | 0.00      | 0.00     | 0.01     | 0.03     | 0.04      |      |
|                    |                  | 3              | 0.00      | 0.00     | 0.01     | 0.05     | 0.06      |      |
|                    | imp              | 1              | 0.00      | 0.01     | 0.04     | 0.07     | 0.07      |      |
|                    |                  | 2              | 0.00      | 0.01     | 0.05     | 0.09     | 0.10      |      |
|                    |                  | 3              | 0.19      | 0.20     | 0.28     | 0.35     | 0.36      |      |
|                    | gent intercept   |                |           | 0.02     | 0.02     | 0.03     | 0.05      | 0.05 |
|                    |                  |                |           | 0.28     | 0.29     | 0.32     | 0.36      | 0.36 |
|                    |                  | distance       | 1         | 0.08     | 0.09     | 0.13     | 0.18      | 0.19 |
|                    | Portland, Oregon | distance       | 2         | 0.00     | 0.00     | 0.02     | 0.06      | 0.07 |
|                    |                  |                | 3         | 0.00     | 0.00     | 0.03     | 0.09      | 0.11 |
|                    |                  |                | imp       | 1        | 0.03     | 0.04     | 0.08      | 0.11 |
| imp                |                  | 2              | 0.00      | 0.01     | 0.05     | 0.11     | 0.12      |      |
|                    |                  | 3              | 0.58      | 0.60     | 0.66     | 0.72     | 0.74      |      |
|                    |                  | gent intercept |           | 0.00     | 0.00     | 0.02     | 0.04      | 0.04 |
| gent intercept     |                  |                |           | 0.15     | 0.16     | 0.21     | 0.26      | 0.27 |
|                    |                  | distance       | 1         | 0.00     | 0.00     | 0.03     | 0.08      | 0.10 |
|                    |                  | 2              | 0.00      | 0.00     | 0.02     | 0.06     | 0.07      |      |
| Rochester, NY      | distance         | 3              | 0.00      | 0.00     | 0.04     | 0.13     | 0.15      |      |
|                    |                  | imp            | 1         | 0.00     | 0.00     | 0.04     | 0.11      | 0.13 |
|                    |                  | 2              | 0.00      | 0.00     | 0.04     | 0.12     | 0.14      |      |
|                    | imp              | 3              | 0.06      | 0.08     | 0.18     | 0.30     | 0.32      |      |
|                    |                  | gent intercept |           | 0.03     | 0.04     | 0.10     | 0.17      | 0.18 |
|                    |                  | gent intercept |           | 0.17     | 0.18     | 0.22     | 0.25      | 0.26 |
|                    | Sanford, FL      | distance       | 1         | 0.00     | 0.00     | 0.02     | 0.07      | 0.08 |
|                    |                  |                | 2         | 0.00     | 0.00     | 0.01     | 0.05      | 0.06 |
|                    |                  |                | 3         | 0.00     | 0.00     | 0.03     | 0.09      | 0.10 |
| imp                |                  | 1              | 0.00      | 0.00     | 0.02     | 0.07     | 0.08      |      |
|                    |                  | 2              | 0.00      | 0.01     | 0.05     | 0.14     | 0.16      |      |
|                    |                  | 3              | 0.02      | 0.03     | 0.11     | 0.19     | 0.20      |      |
| Salt Lake City, UT | gent intercept   |                | 0.00      | 0.00     | 0.02     | 0.06     | 0.07      |      |
|                    |                  |                |           | 0.57     | 0.58     | 0.64     | 0.68      | 0.69 |
|                    |                  | distance       | 1         | 0.00     | 0.01     | 0.05     | 0.12      | 0.13 |
|                    | distance         | 2              | 0.00      | 0.00     | 0.02     | 0.06     | 0.07      |      |
|                    |                  | 3              | 0.00      | 0.01     | 0.06     | 0.18     | 0.21      |      |
|                    |                  | imp            | 1         | 0.00     | 0.01     | 0.04     | 0.08      | 0.08 |
| Seattle, WA        | imp              | 2              | 0.05      | 0.06     | 0.17     | 0.28     | 0.30      |      |
|                    |                  | 3              | 0.23      | 0.25     | 0.39     | 0.53     | 0.56      |      |
|                    |                  | gent intercept |           | 0.00     | 0.00     | 0.01     | 0.04      | 0.04 |
|                    | gent intercept   |                |           | 0.15     | 0.16     | 0.22     | 0.27      | 0.27 |

**Table S16:** City specific-estimates from the beta diversity model. Note that the two continuous covariates (geographic distance and impervious cover) have been transformed with I-splines, so each covariate has multiple slope terms. (continued)

| City            | Spline         | Parameter | CI(0.025) | CI(0.05) | Estimate | CI(0.95) | CI(0.975) |      |
|-----------------|----------------|-----------|-----------|----------|----------|----------|-----------|------|
| Saint Louis, MO | distance       | 1         | 0.00      | 0.00     | 0.04     | 0.12     | 0.14      |      |
|                 |                | 2         | 0.01      | 0.02     | 0.11     | 0.22     | 0.24      |      |
|                 |                | 3         | 0.01      | 0.03     | 0.19     | 0.41     | 0.46      |      |
|                 | imp            | 1         | 0.00      | 0.00     | 0.03     | 0.09     | 0.10      |      |
|                 |                | 2         | 0.10      | 0.12     | 0.22     | 0.31     | 0.33      |      |
|                 |                | 3         | 0.02      | 0.03     | 0.13     | 0.24     | 0.26      |      |
|                 | gent intercept |           |           | 0.00     | 0.01     | 0.04     | 0.09      | 0.10 |
|                 |                |           |           | 0.18     | 0.19     | 0.22     | 0.24      | 0.25 |
|                 |                |           |           |          |          |          |           |      |
|                 | Tacoma, WA     | distance  | 1         | 0.00     | 0.00     | 0.02     | 0.06      | 0.07 |
|                 |                |           | 2         | 0.00     | 0.00     | 0.03     | 0.09      | 0.10 |
|                 |                |           | 3         | 0.00     | 0.01     | 0.06     | 0.16      | 0.18 |
| imp             |                | 1         | 0.00      | 0.00     | 0.01     | 0.05     | 0.05      |      |
|                 |                | 2         | 0.00      | 0.01     | 0.05     | 0.12     | 0.14      |      |
|                 |                | 3         | 0.07      | 0.09     | 0.16     | 0.23     | 0.24      |      |
| Urbana, IL      | gent intercept |           | 0.00      | 0.01     | 0.03     | 0.06     | 0.07      |      |
|                 |                |           |           | 0.17     | 0.17     | 0.20     | 0.23      | 0.23 |
|                 |                |           |           |          |          |          |           |      |
|                 | distance       | 1         | 0.00      | 0.00     | 0.01     | 0.05     | 0.06      |      |
|                 |                | 2         | 0.00      | 0.00     | 0.01     | 0.05     | 0.06      |      |
|                 |                | 3         | 0.01      | 0.01     | 0.07     | 0.15     | 0.17      |      |
| Wilmington, DE  | imp            | 1         | 0.07      | 0.08     | 0.14     | 0.19     | 0.20      |      |
|                 |                | 2         | 0.00      | 0.00     | 0.04     | 0.10     | 0.11      |      |
|                 |                | 3         | 0.26      | 0.28     | 0.34     | 0.41     | 0.42      |      |
|                 | gent intercept |           |           | 0.01     | 0.02     | 0.05     | 0.08      | 0.09 |
|                 |                |           |           | 0.18     | 0.19     | 0.21     | 0.23      | 0.23 |
|                 |                |           |           |          |          |          |           |      |
| Wilmington, DE  | distance       | 1         | 0.00      | 0.00     | 0.01     | 0.03     | 0.03      |      |
|                 |                | 2         | 0.00      | 0.00     | 0.01     | 0.03     | 0.04      |      |
|                 |                | 3         | 0.00      | 0.01     | 0.05     | 0.10     | 0.11      |      |
|                 | imp            | 1         | 0.00      | 0.00     | 0.01     | 0.02     | 0.03      |      |
|                 |                | 2         | 0.00      | 0.00     | 0.03     | 0.07     | 0.08      |      |
|                 |                | 3         | 0.00      | 0.01     | 0.06     | 0.11     | 0.12      |      |
| Wilmington, DE  | gent intercept |           | 0.00      | 0.00     | 0.01     | 0.03     | 0.04      |      |
|                 |                |           |           | 0.11     | 0.12     | 0.14     | 0.17      | 0.18 |
|                 |                |           |           |          |          |          |           |      |
|                 | distance       | 1         | 0.00      | 0.00     | 0.02     | 0.05     | 0.06      |      |
|                 |                | 2         | 0.00      | 0.00     | 0.01     | 0.05     | 0.06      |      |
|                 |                | 3         | 0.00      | 0.00     | 0.04     | 0.11     | 0.12      |      |
| gent            | 1              | 0.01      | 0.01      | 0.05     | 0.10     | 0.11     |           |      |
|                 | 2              | 0.01      | 0.01      | 0.07     | 0.13     | 0.14     |           |      |
|                 | 3              | 0.00      | 0.01      | 0.05     | 0.11     | 0.12     |           |      |
| Wilmington, DE  | gent           |           | 0.00      | 0.00     | 0.02     | 0.04     | 0.05      |      |

## Multi-city multi-species occupancy model estimates

**Table S17:** Community average estimates of whether species were available for sampling within a given city. Distance to the edge of a species range was calculated such that cities outside of a species distributional extent were negative values while cities inside of a species distributional extent were positive values.

| Parameter              | CI(0.025) | CI(0.05) | Estimate | CI(0.95) | CI(0.975) |
|------------------------|-----------|----------|----------|----------|-----------|
| Intercept              | 0.37      | 0.48     | 1.09     | 1.79     | 1.94      |
| Dist. to edge of range | 4.04      | 4.45     | 7.37     | 12.60    | 13.75     |

**Table S18:** The estimated standard deviation of species-specific estimates from the community means of whether a species was available for sampling within a city.

| Parameter              | CI(0.025) | CI(0.05) | Estimate | CI(0.95) | CI(0.975) |
|------------------------|-----------|----------|----------|----------|-----------|
| Intercept              | 0.22      | 0.26     | 0.66     | 1.66     | 1.99      |
| Dist. to edge of range | 0.01      | 0.01     | 0.06     | 0.24     | 0.31      |

**Table S19:** Species-specific estimates for whether they were available for sampling within a given city. Distance to the edge of a species range was calculated such that cities outside of a species distributional extent were negative values while cities inside of a species distributional extent were positive values.

| Parameter             | Species                | CI(0.025) | CI(0.05) | Estimate | CI(0.95) | CI(0.975) |
|-----------------------|------------------------|-----------|----------|----------|----------|-----------|
| intercept             | armadillo              | -0.37     | -0.10    | 1.24     | 2.86     | 3.23      |
|                       | bobcat                 | -0.90     | -0.75    | 0.30     | 1.43     | 1.68      |
|                       | cottontail sp          | 1.21      | 1.43     | 2.73     | 4.70     | 5.23      |
|                       | coyote                 | 0.80      | 1.01     | 2.37     | 4.36     | 4.88      |
|                       | eastern chipmunk       | -0.02     | 0.14     | 1.03     | 2.11     | 2.36      |
|                       | elk                    | -0.88     | -0.61    | 0.70     | 2.13     | 2.40      |
|                       | flying squirrel sp     | -0.38     | -0.16    | 1.14     | 2.82     | 3.26      |
|                       | fox squirrel           | -0.09     | 0.06     | 0.86     | 2.13     | 2.60      |
|                       | gray fox               | -0.35     | -0.12    | 1.13     | 2.80     | 3.23      |
|                       | gray squirrel sp       | 0.91      | 1.10     | 2.33     | 4.07     | 4.46      |
|                       | mule deer              | 0.19      | 0.44     | 1.82     | 3.77     | 4.25      |
|                       | north american badger  | -1.70     | -1.41    | 0.04     | 2.02     | 2.46      |
|                       | north american beaver  | -1.66     | -1.37    | 0.11     | 1.88     | 2.31      |
|                       | north american mink    | -1.73     | -1.48    | -0.18    | 1.46     | 1.86      |
|                       | raccoon                | 1.21      | 1.40     | 2.71     | 4.66     | 5.20      |
|                       | red fox                | -0.65     | -0.45    | 0.55     | 1.71     | 2.00      |
|                       | red squirrel           | -1.51     | -1.29    | -0.17    | 1.52     | 1.95      |
|                       | striped skunk          | 0.05      | 0.26     | 1.40     | 2.90     | 3.31      |
|                       | virginia opossum       | 1.06      | 1.24     | 2.40     | 4.00     | 4.38      |
|                       | white tailed deer      | 0.23      | 0.41     | 1.45     | 3.08     | 3.58      |
|                       | woodchuck              | -0.56     | -0.29    | 0.97     | 2.45     | 2.78      |
|                       | Dist. to edge of range | armadillo | 4.51     | 5.22     | 10.25    | 20.60     |
| bobcat                |                        | 3.41      | 4.10     | 9.20     | 21.95    | 25.19     |
| cottontail sp         |                        | 0.81      | 1.73     | 7.01     | 15.32    | 17.71     |
| coyote                |                        | 1.54      | 2.43     | 7.99     | 18.79    | 21.30     |
| eastern chipmunk      |                        | 0.29      | 0.38     | 0.96     | 1.70     | 1.89      |
| elk                   |                        | 3.95      | 4.66     | 10.38    | 22.08    | 24.87     |
| flying squirrel sp    |                        | 2.72      | 3.61     | 9.25     | 20.65    | 23.74     |
| fox squirrel          |                        | -0.48     | -0.19    | 1.08     | 2.65     | 3.00      |
| gray fox              |                        | 1.64      | 2.41     | 8.41     | 19.33    | 22.44     |
| gray squirrel sp      |                        | 3.69      | 4.30     | 8.91     | 18.55    | 21.34     |
| mule deer             |                        | 3.82      | 4.36     | 8.79     | 17.86    | 20.18     |
| north american badger |                        | 1.73      | 2.40     | 7.04     | 15.87    | 18.44     |
| north american beaver |                        | 2.61      | 3.38     | 8.68     | 18.68    | 21.50     |
| north american mink   |                        | 1.58      | 2.00     | 5.99     | 16.95    | 19.82     |
| raccoon               |                        | 0.80      | 1.53     | 6.62     | 14.05    | 16.04     |
| red fox               |                        | 2.22      | 2.92     | 7.60     | 15.80    | 18.46     |
| red squirrel          |                        | 1.71      | 2.18     | 6.31     | 17.44    | 20.40     |
| striped skunk         |                        | 1.58      | 2.33     | 7.43     | 16.80    | 19.18     |
| virginia opossum      |                        | 3.46      | 4.12     | 9.29     | 18.29    | 20.74     |
| white tailed deer     |                        | 0.43      | 0.84     | 3.56     | 7.43     | 8.34      |
| woodchuck             |                        | 4.04      | 4.68     | 9.84     | 20.49    | 23.49     |



**Table S20:** Community-level occupancy parameters.

| Parameter  | CI(0.025) | CI(0.05) | Estimate | CI(0.95) | CI(0.975) |
|------------|-----------|----------|----------|----------|-----------|
| intercept  | -2.95     | -2.84    | -2.24    | -1.65    | -1.51     |
| gent       | -0.17     | -0.13    | 0.07     | 0.26     | 0.30      |
| imp        | -2.25     | -2.03    | -0.95    | -0.03    | 0.10      |
| gent X imp | -1.78     | -1.66    | -1.09    | -0.53    | -0.41     |

**Table S21:** Species-level standard deviation of their among-city occupancy parameters from the community-level averages.

| Parameter  | CI(0.025) | CI(0.05) | Estimate | CI(0.95) | CI(0.975) |
|------------|-----------|----------|----------|----------|-----------|
| intercept  | 0.21      | 0.24     | 0.44     | 0.74     | 0.81      |
| gent       | 2.23      | 2.56     | 4.97     | 8.83     | 9.82      |
| imp        | 0.07      | 0.08     | 0.14     | 0.26     | 0.29      |
| gent X imp | 0.38      | 0.47     | 1.40     | 3.79     | 4.45      |

**Table S22:** Species-specific but among-city average estimates related to a species latent distribution (occupancy).

| Parameter             | Species               | CI(0.025)     | CI(0.05) | Estimate | CI(0.95) | CI(0.975) |       |
|-----------------------|-----------------------|---------------|----------|----------|----------|-----------|-------|
| intercept             | armadillo             | -2.44         | -2.26    | -1.46    | -0.69    | -0.56     |       |
|                       | bobcat                | -3.25         | -3.11    | -2.49    | -1.95    | -1.85     |       |
|                       | cottontail sp         | -1.42         | -1.35    | -1.04    | -0.72    | -0.66     |       |
|                       | coyote                | -1.01         | -0.94    | -0.61    | -0.28    | -0.22     |       |
|                       | eastern chipmunk      | -3.37         | -3.25    | -2.68    | -2.20    | -2.09     |       |
|                       | elk                   | -5.15         | -4.90    | -3.78    | -2.67    | -2.43     |       |
|                       | flying squirrel sp    | -5.23         | -5.08    | -4.34    | -3.68    | -3.55     |       |
|                       | fox squirrel          | -3.12         | -2.82    | -1.59    | -0.75    | -0.59     |       |
|                       | gray fox              | -4.45         | -4.28    | -3.52    | -2.84    | -2.72     |       |
|                       | gray squirrel sp      | -0.26         | -0.16    | 0.32     | 0.78     | 0.89      |       |
|                       | mule deer             | -3.25         | -3.04    | -2.02    | -1.06    | -0.87     |       |
|                       | north american badger | -6.45         | -6.17    | -4.93    | -3.77    | -3.56     |       |
|                       | north american beaver | -5.32         | -5.18    | -4.42    | -3.68    | -3.53     |       |
|                       | north american mink   | -4.11         | -3.92    | -3.01    | -2.25    | -2.12     |       |
|                       | raccoon               | -0.36         | -0.28    | 0.09     | 0.44     | 0.51      |       |
|                       | red fox               | -2.77         | -2.55    | -1.68    | -0.95    | -0.80     |       |
|                       | red squirrel          | -5.17         | -4.87    | -3.37    | -2.33    | -2.15     |       |
|                       | striped skunk         | -2.86         | -2.78    | -2.36    | -1.98    | -1.90     |       |
|                       | virginia opossum      | -1.40         | -1.30    | -0.81    | -0.35    | -0.25     |       |
|                       | white tailed deer     | -2.72         | -2.49    | -1.41    | -0.52    | -0.35     |       |
|                       | woodchuck             | -3.26         | -3.12    | -2.53    | -1.99    | -1.89     |       |
|                       | gent                  | armadillo     | -0.76    | -0.67    | -0.19    | 0.26      | 0.35  |
|                       |                       | bobcat        | -0.46    | -0.38    | 0.04     | 0.45      | 0.52  |
|                       |                       | cottontail sp | 0.04     | 0.08     | 0.28     | 0.47      | 0.50  |
|                       |                       | coyote        | -0.15    | -0.11    | 0.10     | 0.33      | 0.37  |
| eastern chipmunk      |                       | -0.34         | -0.28    | 0.07     | 0.42     | 0.48      |       |
| elk                   |                       | -1.22         | -1.03    | -0.19    | 0.54     | 0.67      |       |
| flying squirrel sp    |                       | -1.03         | -0.88    | -0.18    | 0.48     | 0.60      |       |
| fox squirrel          |                       | -0.36         | -0.31    | -0.02    | 0.27     | 0.34      |       |
| gray fox              |                       | -0.35         | -0.27    | 0.15     | 0.57     | 0.65      |       |
| gray squirrel sp      |                       | -0.36         | -0.32    | -0.09    | 0.15     | 0.20      |       |
| mule deer             |                       | -0.48         | -0.41    | 0.03     | 0.46     | 0.54      |       |
| north american badger |                       | -0.66         | -0.54    | 0.06     | 0.67     | 0.79      |       |
| north american beaver |                       | -0.36         | -0.25    | 0.31     | 0.87     | 0.99      |       |
| north american mink   |                       | -0.50         | -0.39    | 0.13     | 0.65     | 0.76      |       |
| raccoon               |                       | 0.16          | 0.19     | 0.40     | 0.61     | 0.65      |       |
| red fox               |                       | -0.15         | -0.10    | 0.18     | 0.45     | 0.50      |       |
| red squirrel          |                       | -0.72         | -0.61    | -0.05    | 0.51     | 0.62      |       |
| striped skunk         |                       | -0.55         | -0.48    | -0.17    | 0.14     | 0.20      |       |
| virginia opossum      |                       | -0.13         | -0.09    | 0.13     | 0.35     | 0.39      |       |
| white tailed deer     |                       | -0.11         | -0.05    | 0.23     | 0.50     | 0.55      |       |
| woodchuck             |                       | 0.20          | 0.27     | 0.66     | 1.07     | 1.15      |       |
| imp                   |                       | armadillo     | -4.90    | -4.62    | -3.08    | -1.51     | -1.16 |
|                       |                       | bobcat        | -6.23    | -5.96    | -4.69    | -3.40     | -3.16 |
|                       |                       | cottontail sp | -0.37    | -0.22    | 0.53     | 1.25      | 1.39  |
|                       |                       | coyote        | -3.04    | -2.87    | -2.11    | -1.39     | -1.26 |
|                       | eastern chipmunk      | -2.55         | -2.32    | -1.15    | -0.06    | 0.17      |       |
|                       | elk                   | -9.40         | -8.81    | -5.80    | -2.95    | -2.40     |       |
|                       | flying squirrel sp    | -2.35         | -1.99    | -0.13    | 1.65     | 2.00      |       |
|                       | fox squirrel          | -1.43         | -1.22    | -0.16    | 0.95     | 1.17      |       |

**Table S22:** Species-specific but among-city average estimates related to a species latent distribution (occupancy).  
(continued)

| Parameter         | Species               | CI(0.025) | CI(0.05) | Estimate | CI(0.95) | CI(0.975) |
|-------------------|-----------------------|-----------|----------|----------|----------|-----------|
| gent X imp        | gray fox              | -3.10     | -2.82    | -1.51    | -0.22    | 0.03      |
|                   | gray squirrel sp      | 1.17      | 1.31     | 2.03     | 2.73     | 2.87      |
|                   | mule deer             | -6.64     | -6.32    | -4.82    | -3.21    | -2.82     |
|                   | north american badger | -6.51     | -5.90    | -2.91    | -0.19    | 0.35      |
|                   | north american beaver | -0.44     | -0.09    | 1.96     | 4.02     | 4.41      |
|                   | north american mink   | -0.90     | -0.57    | 1.01     | 2.51     | 2.81      |
|                   | raccoon               | -0.58     | -0.40    | 0.37     | 1.12     | 1.27      |
|                   | red fox               | -0.51     | -0.29    | 0.86     | 2.00     | 2.22      |
|                   | red squirrel          | -3.84     | -3.41    | -1.36    | 0.62     | 1.07      |
|                   | striped skunk         | -1.56     | -1.36    | -0.43    | 0.46     | 0.62      |
|                   | virginia opossum      | -0.64     | -0.50    | 0.23     | 0.95     | 1.11      |
|                   | white tailed deer     | -6.85     | -6.63    | -5.50    | -4.39    | -4.18     |
|                   | woodchuck             | 0.04      | 0.29     | 1.55     | 2.77     | 3.02      |
|                   | armadillo             | -4.28     | -3.81    | -1.92    | -0.59    | -0.32     |
|                   | bobcat                | -2.05     | -1.78    | -0.53    | 1.08     | 1.45      |
|                   | cottontail sp         | -2.09     | -1.92    | -1.10    | -0.29    | -0.13     |
|                   | coyote                | -2.71     | -2.52    | -1.59    | -0.73    | -0.56     |
|                   | eastern chipmunk      | -2.92     | -2.63    | -1.38    | -0.20    | 0.02      |
|                   | elk                   | -3.03     | -2.66    | -1.06    | 0.59     | 0.99      |
|                   | flying squirrel sp    | -3.13     | -2.75    | -1.20    | 0.29     | 0.66      |
|                   | fox squirrel          | -1.86     | -1.65    | -0.62    | 0.55     | 0.81      |
|                   | gray fox              | -1.58     | -1.34    | -0.03    | 1.66     | 2.02      |
|                   | gray squirrel sp      | -2.85     | -2.65    | -1.65    | -0.73    | -0.55     |
|                   | mule deer             | -3.01     | -2.70    | -1.32    | -0.05    | 0.27      |
|                   | north american badger | -3.43     | -3.07    | -1.36    | 0.02     | 0.34      |
|                   | north american beaver | -2.94     | -2.58    | -1.15    | 0.27     | 0.61      |
|                   | north american mink   | -3.00     | -2.68    | -1.23    | 0.17     | 0.46      |
|                   | raccoon               | -2.23     | -2.04    | -1.14    | -0.18    | 0.01      |
|                   | red fox               | -2.83     | -2.61    | -1.49    | -0.47    | -0.28     |
|                   | red squirrel          | -3.77     | -3.33    | -1.52    | -0.11    | 0.19      |
|                   | striped skunk         | -2.72     | -2.49    | -1.33    | -0.21    | 0.00      |
|                   | virginia opossum      | -1.68     | -1.52    | -0.66    | 0.22     | 0.40      |
| white tailed deer | -2.27                 | -2.09     | -1.00    | 0.08     | 0.32     |           |
| woodchuck         | -2.43                 | -2.15     | -0.92    | 0.41     | 0.71     |           |

**Table S23:** Estimated hyperparameters for the Gamma distributions that informed species and city-specific variability around a species among-city mean with respect to their latent distribution (occupancy).

| Parameter  | Shape or rate | CI(0.025) | CI(0.05) | Estimate | CI(0.95) | CI(0.975) |
|------------|---------------|-----------|----------|----------|----------|-----------|
| intercept  | shape         | 1.34      | 1.55     | 3.11     | 5.97     | 6.52      |
|            | rate          | 1.38      | 1.64     | 3.93     | 8.33     | 9.04      |
| gent       | shape         | 2.60      | 3.29     | 7.48     | 9.79     | 9.89      |
|            | rate          | 0.11      | 0.15     | 0.55     | 1.25     | 1.41      |
| imp        | shape         | 1.69      | 1.91     | 3.21     | 4.64     | 5.00      |
|            | rate          | 3.86      | 4.54     | 8.17     | 9.85     | 9.92      |
| gent X imp | shape         | 1.26      | 1.51     | 3.59     | 7.34     | 8.42      |
|            | rate          | 1.47      | 2.05     | 6.89     | 9.72     | 9.85      |

**Table S24:** The occupancy-level standard deviation for city and species-specific estimate around each species among-city average.

| Parameter             | Species               | CI(0.025)     | CI(0.05) | Estimate | CI(0.95) | CI(0.975) |       |
|-----------------------|-----------------------|---------------|----------|----------|----------|-----------|-------|
| intercept             | armadillo             | 0.30          | 0.35     | 0.81     | 1.65     | 1.88      |       |
|                       | bobcat                | 0.38          | 0.44     | 0.92     | 1.82     | 2.06      |       |
|                       | cottontail sp         | 0.71          | 0.80     | 1.35     | 2.24     | 2.47      |       |
|                       | coyote                | 0.67          | 0.74     | 1.25     | 2.06     | 2.27      |       |
|                       | eastern chipmunk      | 0.42          | 0.48     | 1.01     | 1.93     | 2.20      |       |
|                       | elk                   | 0.24          | 0.31     | 0.84     | 1.99     | 2.38      |       |
|                       | flying squirrel sp    | 0.35          | 0.41     | 0.87     | 1.82     | 2.08      |       |
|                       | fox squirrel          | 0.10          | 0.12     | 0.30     | 0.59     | 0.66      |       |
|                       | gray fox              | 0.19          | 0.22     | 0.46     | 0.89     | 1.01      |       |
|                       | gray squirrel sp      | 0.35          | 0.39     | 0.66     | 1.04     | 1.13      |       |
|                       | mule deer             | 0.13          | 0.15     | 0.35     | 0.69     | 0.78      |       |
|                       | north american badger | 0.24          | 0.30     | 0.81     | 1.92     | 2.23      |       |
|                       | north american beaver | 0.33          | 0.39     | 0.84     | 1.75     | 2.05      |       |
|                       | north american mink   | 0.28          | 0.33     | 0.77     | 1.63     | 1.88      |       |
|                       | raccoon               | 0.54          | 0.59     | 0.97     | 1.55     | 1.69      |       |
|                       | red fox               | 0.13          | 0.15     | 0.30     | 0.54     | 0.59      |       |
|                       | red squirrel          | 0.12          | 0.15     | 0.54     | 1.41     | 1.67      |       |
|                       | striped skunk         | 0.55          | 0.62     | 1.15     | 2.09     | 2.33      |       |
|                       | virginia opossum      | 0.32          | 0.36     | 0.62     | 1.01     | 1.10      |       |
|                       | white tailed deer     | 0.08          | 0.09     | 0.18     | 0.32     | 0.35      |       |
|                       | woodchuck             | 0.41          | 0.48     | 1.02     | 2.13     | 2.45      |       |
|                       | gent                  | armadillo     | 4.09     | 4.93     | 12.67    | 37.39     | 47.63 |
|                       |                       | bobcat        | 3.94     | 4.82     | 12.68    | 37.08     | 48.79 |
|                       |                       | cottontail sp | 5.10     | 5.97     | 13.70    | 37.30     | 46.92 |
|                       |                       | coyote        | 4.34     | 5.18     | 12.24    | 34.08     | 43.67 |
| eastern chipmunk      |                       | 3.46          | 4.27     | 11.54    | 35.05    | 45.37     |       |
| elk                   |                       | 3.72          | 4.56     | 12.23    | 36.40    | 46.34     |       |
| flying squirrel sp    |                       | 3.87          | 4.67     | 12.26    | 36.24    | 46.37     |       |
| fox squirrel          |                       | 4.16          | 5.04     | 12.29    | 35.53    | 45.58     |       |
| gray fox              |                       | 3.88          | 4.70     | 12.38    | 36.17    | 47.22     |       |
| gray squirrel sp      |                       | 4.26          | 5.02     | 12.20    | 35.19    | 45.86     |       |
| mule deer             |                       | 3.21          | 3.99     | 11.38    | 34.87    | 45.33     |       |
| north american badger |                       | 3.78          | 4.66     | 12.22    | 36.56    | 48.03     |       |
| north american beaver |                       | 3.67          | 4.46     | 12.01    | 36.23    | 46.35     |       |
| north american mink   |                       | 3.76          | 4.59     | 12.10    | 36.81    | 46.24     |       |
| raccoon               |                       | 4.71          | 5.50     | 12.95    | 36.10    | 48.83     |       |
| red fox               |                       | 4.48          | 5.32     | 12.90    | 37.37    | 47.10     |       |
| red squirrel          |                       | 3.74          | 4.61     | 12.27    | 36.56    | 45.65     |       |
| striped skunk         |                       | 3.99          | 4.83     | 12.05    | 35.70    | 45.24     |       |
| virginia opossum      |                       | 3.60          | 4.22     | 10.05    | 29.24    | 38.78     |       |
| white tailed deer     |                       | 4.00          | 4.79     | 12.04    | 34.88    | 45.61     |       |
| woodchuck             |                       | 3.99          | 4.83     | 12.38    | 37.35    | 46.61     |       |
| imp                   |                       | armadillo     | 0.10     | 0.12     | 0.34     | 0.78      | 0.91  |
|                       |                       | bobcat        | 0.15     | 0.19     | 0.47     | 1.01      | 1.14  |
|                       |                       | cottontail sp | 0.18     | 0.20     | 0.38     | 0.68      | 0.75  |
|                       |                       | coyote        | 0.18     | 0.21     | 0.43     | 0.87      | 0.98  |
|                       | eastern chipmunk      | 0.11          | 0.14     | 0.35     | 0.81     | 0.93      |       |
|                       | elk                   | 0.08          | 0.11     | 0.39     | 0.92     | 1.07      |       |
|                       | flying squirrel sp    | 0.12          | 0.14     | 0.39     | 0.91     | 1.06      |       |

**Table S24:** The occupancy-level standard deviation for city and species-specific estimate around each species among-city average. (continued)

| Parameter  | Species               | CI(0.025) | CI(0.05) | Estimate | CI(0.95) | CI(0.975) |
|------------|-----------------------|-----------|----------|----------|----------|-----------|
| gent X imp | fox squirrel          | 0.10      | 0.12     | 0.27     | 0.56     | 0.64      |
|            | gray fox              | 0.10      | 0.12     | 0.29     | 0.68     | 0.80      |
|            | gray squirrel sp      | 0.26      | 0.29     | 0.60     | 1.13     | 1.27      |
|            | mule deer             | 0.08      | 0.10     | 0.28     | 0.68     | 0.80      |
|            | north american badger | 0.06      | 0.08     | 0.30     | 0.81     | 0.95      |
|            | north american beaver | 0.10      | 0.13     | 0.38     | 0.91     | 1.05      |
|            | north american mink   | 0.11      | 0.14     | 0.37     | 0.87     | 1.00      |
|            | raccoon               | 0.15      | 0.17     | 0.31     | 0.55     | 0.61      |
|            | red fox               | 0.09      | 0.10     | 0.22     | 0.46     | 0.52      |
|            | red squirrel          | 0.06      | 0.08     | 0.32     | 0.83     | 0.97      |
|            | striped skunk         | 0.15      | 0.18     | 0.46     | 1.00     | 1.16      |
|            | virginia opossum      | 0.21      | 0.24     | 0.46     | 0.86     | 0.95      |
|            | white tailed deer     | 0.09      | 0.10     | 0.24     | 0.52     | 0.61      |
|            | woodchuck             | 0.13      | 0.15     | 0.39     | 0.83     | 0.97      |
|            | armadillo             | 0.04      | 0.07     | 0.48     | 1.47     | 1.83      |
|            | bobcat                | 0.10      | 0.14     | 0.55     | 1.55     | 1.90      |
|            | cottontail sp         | 0.23      | 0.29     | 0.70     | 1.78     | 2.17      |
|            | coyote                | 0.19      | 0.24     | 0.65     | 1.75     | 2.22      |
|            | eastern chipmunk      | 0.14      | 0.18     | 0.57     | 1.58     | 1.95      |
|            | elk                   | 0.10      | 0.14     | 0.54     | 1.54     | 1.90      |
|            | flying squirrel sp    | 0.12      | 0.15     | 0.56     | 1.53     | 1.92      |
|            | fox squirrel          | 0.14      | 0.19     | 0.58     | 1.63     | 2.00      |
|            | gray fox              | 0.11      | 0.14     | 0.51     | 1.45     | 1.78      |
|            | gray squirrel sp      | 0.17      | 0.21     | 0.60     | 1.60     | 1.98      |
|            | mule deer             | 0.09      | 0.12     | 0.50     | 1.48     | 1.82      |
|            | north american badger | 0.10      | 0.14     | 0.53     | 1.55     | 1.92      |
|            | north american beaver | 0.11      | 0.14     | 0.53     | 1.54     | 1.92      |
|            | north american mink   | 0.10      | 0.15     | 0.55     | 1.56     | 1.93      |
|            | raccoon               | 0.08      | 0.10     | 0.28     | 0.88     | 1.12      |
|            | red fox               | 0.14      | 0.18     | 0.58     | 1.56     | 1.95      |
|            | red squirrel          | 0.09      | 0.13     | 0.53     | 1.51     | 1.87      |
|            | striped skunk         | 0.09      | 0.11     | 0.42     | 1.29     | 1.61      |
|            | virginia opossum      | 0.19      | 0.22     | 0.57     | 1.50     | 1.85      |
|            | white tailed deer     | 0.14      | 0.18     | 0.55     | 1.53     | 1.91      |
| woodchuck  | 0.08                  | 0.10      | 0.39     | 1.26     | 1.55     |           |

**Table S25:** Species and city-specific occupancy parameters. Note that all of these species do not likely reside in this city (that is controlled by another level of the model).

| City       | Parameter             | Species               | CI(0.025) | CI(0.05) | Estimate | CI(0.95) | CI(0.975) |      |
|------------|-----------------------|-----------------------|-----------|----------|----------|----------|-----------|------|
| Athens, GA | intercept             | armadillo             | -1.34     | -1.25    | -0.79    | -0.35    | -0.27     |      |
|            |                       | bobcat                | -2.97     | -2.83    | -2.13    | -1.43    | -1.29     |      |
|            |                       | cottontail sp         | -1.83     | -1.75    | -1.29    | -0.86    | -0.78     |      |
|            |                       | coyote                | -1.26     | -1.16    | -0.71    | -0.27    | -0.18     |      |
|            |                       | eastern chipmunk      | -5.43     | -5.01    | -2.98    | -1.07    | -0.68     |      |
|            |                       | elk                   | -6.55     | -6.02    | -3.78    | -1.50    | -0.96     |      |
|            |                       | flying squirrel sp    | -7.21     | -6.73    | -4.82    | -3.32    | -3.07     |      |
|            |                       | fox squirrel          | -7.39     | -6.57    | -2.31    | 1.22     | 1.95      |      |
|            |                       | gray fox              | -1.52     | -1.43    | -0.98    | -0.54    | -0.45     |      |
|            |                       | gray squirrel sp      | 0.22      | 0.31     | 0.78     | 1.28     | 1.37      |      |
|            |                       | mule deer             | -5.96     | -5.13    | -2.03    | 1.06     | 1.74      |      |
|            |                       | north american badger | -7.89     | -7.31    | -4.90    | -2.68    | -2.20     |      |
|            |                       | north american beaver | -7.25     | -6.81    | -4.85    | -3.27    | -2.95     |      |
|            |                       | north american mink   | -6.44     | -5.88    | -3.72    | -1.62    | -1.18     |      |
|            |                       | raccoon               | -0.51     | -0.43    | -0.02    | 0.41     | 0.50      |      |
|            |                       | red fox               | -2.11     | -2.00    | -1.39    | -0.74    | -0.60     |      |
|            |                       | red squirrel          | -7.82     | -6.94    | -3.62    | -0.99    | -0.45     |      |
|            |                       | striped skunk         | -3.78     | -3.59    | -2.75    | -1.95    | -1.78     |      |
|            |                       | virginia opossum      | -1.14     | -1.05    | -0.61    | -0.18    | -0.10     |      |
|            |                       | white tailed deer     | 1.58      | 1.73     | 2.66     | 3.79     | 4.07      |      |
|            |                       | woodchuck             | -5.18     | -4.74    | -2.68    | -0.87    | -0.53     |      |
|            |                       | gent                  | armadillo | -0.96    | -0.84    | -0.23    | 0.38      | 0.51 |
|            |                       |                       | bobcat    | -0.80    | -0.65    | 0.00     | 0.61      | 0.73 |
|            | cottontail sp         |                       | -0.24     | -0.14    | 0.31     | 0.80     | 0.90      |      |
|            | coyote                |                       | -0.43     | -0.34    | 0.15     | 0.68     | 0.80      |      |
|            | eastern chipmunk      |                       | -0.69     | -0.56    | 0.07     | 0.70     | 0.82      |      |
|            | elk                   |                       | -1.40     | -1.18    | -0.20    | 0.69     | 0.87      |      |
|            | flying squirrel sp    |                       | -1.23     | -1.05    | -0.18    | 0.65     | 0.81      |      |
|            | fox squirrel          |                       | -0.70     | -0.58    | -0.03    | 0.56     | 0.69      |      |
|            | gray fox              |                       | -0.38     | -0.28    | 0.30     | 0.92     | 1.06      |      |
|            | gray squirrel sp      |                       | -0.76     | -0.64    | -0.15    | 0.34     | 0.44      |      |
|            | mule deer             |                       | -0.81     | -0.65    | 0.03     | 0.70     | 0.86      |      |
|            | north american badger |                       | -0.88     | -0.72    | 0.07     | 0.86     | 1.01      |      |
|            | north american beaver |                       | -0.62     | -0.46    | 0.30     | 1.07     | 1.23      |      |
|            | north american mink   |                       | -0.75     | -0.61    | 0.13     | 0.84     | 1.01      |      |
|            | raccoon               |                       | -0.11     | -0.01    | 0.44     | 0.94     | 1.05      |      |
|            | red fox               |                       | -0.46     | -0.34    | 0.19     | 0.69     | 0.81      |      |
|            | red squirrel          |                       | -0.97     | -0.80    | -0.06    | 0.71     | 0.86      |      |
|            | striped skunk         |                       | -0.80     | -0.68    | -0.11    | 0.48     | 0.64      |      |
|            | virginia opossum      |                       | -0.59     | -0.48    | 0.05     | 0.55     | 0.64      |      |
|            | white tailed deer     |                       | -0.48     | -0.36    | 0.21     | 0.75     | 0.88      |      |
|            | woodchuck             |                       | -0.14     | 0.01     | 0.67     | 1.30     | 1.44      |      |
| imp        | armadillo             |                       | -5.44     | -4.99    | -2.64    | -0.21    | 0.28      |      |
|            | bobcat                |                       | -8.82     | -8.15    | -5.41    | -2.92    | -2.43     |      |
|            | cottontail sp         | -4.11                 | -3.59     | -1.15    | 1.06     | 1.45     |           |      |
|            | coyote                | -5.90                 | -5.43     | -3.09    | -1.00    | -0.57    |           |      |
|            | eastern chipmunk      | -5.05                 | -4.26     | -1.14    | 1.96     | 2.65     |           |      |
|            | elk                   | -10.81                | -9.88     | -5.88    | -1.65    | -0.63    |           |      |
|            | flying squirrel sp    | -4.25                 | -3.50     | -0.08    | 3.18     | 3.93     |           |      |



**Table S25:** Species and city-specific occupancy parameters. Note that all of these species do not likely reside in this city (that is controlled by another level of the model). (continued)

| City                  | Parameter  | Species               | CI(0.025) | CI(0.05) | Estimate | CI(0.95) | CI(0.975) |
|-----------------------|------------|-----------------------|-----------|----------|----------|----------|-----------|
| Bay Area, CA          | gent X imp | fox squirrel          | -4.32     | -3.59    | -0.15    | 3.43     | 4.27      |
|                       |            | gray fox              | -4.09     | -3.62    | -1.25    | 1.18     | 1.75      |
|                       |            | gray squirrel sp      | 0.61      | 0.98     | 2.85     | 4.89     | 5.31      |
|                       |            | mule deer             | -9.33     | -8.58    | -4.86    | -1.01    | -0.05     |
|                       |            | north american badger | -8.25     | -7.27    | -3.01    | 1.55     | 2.73      |
|                       |            | north american beaver | -2.48     | -1.60    | 1.94     | 5.40     | 6.18      |
|                       |            | north american mink   | -3.21     | -2.38    | 0.98     | 4.14     | 4.84      |
|                       |            | raccoon               | -2.13     | -1.73    | 0.45     | 2.59     | 2.98      |
|                       |            | red fox               | -1.45     | -0.85    | 2.02     | 5.18     | 5.84      |
|                       |            | red squirrel          | -6.37     | -5.31    | -1.35    | 2.53     | 3.61      |
|                       |            | striped skunk         | -4.59     | -3.95    | -1.11    | 1.28     | 1.79      |
|                       |            | virginia opossum      | -2.94     | -2.49    | -0.43    | 1.51     | 1.86      |
|                       |            | white tailed deer     | -11.48    | -10.59   | -6.77    | -3.50    | -2.93     |
|                       |            | woodchuck             | -2.31     | -1.58    | 1.55     | 4.54     | 5.24      |
|                       |            | armadillo             | -5.38     | -4.70    | -1.68    | 2.01     | 3.33      |
|                       |            | bobcat                | -4.12     | -3.40    | -0.47    | 2.44     | 3.12      |
|                       |            | cottontail sp         | -3.55     | -3.05    | -0.84    | 1.46     | 1.98      |
|                       |            | coyote                | -3.99     | -3.51    | -1.26    | 1.26     | 1.92      |
|                       |            | eastern chipmunk      | -4.75     | -4.13    | -1.41    | 1.30     | 1.98      |
|                       |            | elk                   | -4.93     | -4.14    | -1.10    | 2.03     | 2.67      |
|                       |            | flying squirrel sp    | -4.84     | -4.12    | -1.23    | 1.75     | 2.48      |
|                       |            | fox squirrel          | -3.94     | -3.28    | -0.62    | 2.05     | 2.59      |
|                       |            | gray fox              | -2.80     | -2.21    | 0.50     | 3.61     | 4.31      |
|                       |            | gray squirrel sp      | -4.30     | -3.82    | -1.49    | 1.04     | 1.70      |
|                       |            | mule deer             | -5.21     | -4.32    | -1.33    | 1.66     | 2.36      |
|                       |            | north american badger | -5.16     | -4.49    | -1.41    | 1.62     | 2.44      |
|                       |            | north american beaver | -4.86     | -4.08    | -1.17    | 1.72     | 2.48      |
|                       |            | north american mink   | -4.82     | -4.11    | -1.23    | 1.69     | 2.38      |
|                       |            | raccoon               | -4.31     | -3.65    | -0.59    | 3.20     | 4.06      |
|                       |            | red fox               | -4.19     | -3.66    | -1.24    | 1.50     | 2.29      |
|                       |            | red squirrel          | -5.44     | -4.68    | -1.61    | 1.51     | 2.25      |
|                       |            | striped skunk         | -4.93     | -4.13    | -1.19    | 2.07     | 2.91      |
|                       |            | virginia opossum      | -4.24     | -3.54    | -0.95    | 1.34     | 1.81      |
|                       |            | white tailed deer     | -4.49     | -3.87    | -1.12    | 1.42     | 1.96      |
|                       |            | woodchuck             | -5.03     | -4.16    | -0.90    | 2.37     | 3.22      |
|                       |            | armadillo             | -4.05     | -3.62    | -1.44    | 0.66     | 1.13      |
|                       |            | bobcat                | -4.51     | -4.34    | -3.50    | -2.68    | -2.52     |
|                       |            | cottontail sp         | -2.74     | -2.61    | -1.95    | -1.26    | -1.10     |
|                       |            | coyote                | -0.73     | -0.68    | -0.40    | -0.13    | -0.08     |
|                       |            | eastern chipmunk      | -4.93     | -4.51    | -2.69    | -0.94    | -0.59     |
|                       |            | elk                   | -6.64     | -6.11    | -3.84    | -1.59    | -1.03     |
|                       |            | flying squirrel sp    | -7.00     | -6.51    | -4.46    | -2.50    | -2.11     |
| fox squirrel          | -3.80      | -3.70                 | -3.14     | -2.66    | -2.57    |          |           |
| gray fox              | -4.39      | -4.25                 | -3.62     | -3.06    | -2.95    |          |           |
| gray squirrel sp      | -1.75      | -1.68                 | -1.39     | -1.11    | -1.06    |          |           |
| mule deer             | -7.61      | -7.23                 | -5.60     | -4.39    | -4.20    |          |           |
| north american badger | -8.12      | -7.58                 | -5.18     | -2.80    | -2.26    |          |           |
| north american beaver | -7.13      | -6.65                 | -4.55     | -2.49    | -2.09    |          |           |
| north american mink   | -6.29      | -5.65                 | -3.15     | -1.04    | -0.60    |          |           |
| Bay Area, CA          | intercept  | armadillo             | -4.05     | -3.62    | -1.44    | 0.66     | 1.13      |
|                       |            | bobcat                | -4.51     | -4.34    | -3.50    | -2.68    | -2.52     |
|                       |            | cottontail sp         | -2.74     | -2.61    | -1.95    | -1.26    | -1.10     |
|                       |            | coyote                | -0.73     | -0.68    | -0.40    | -0.13    | -0.08     |
|                       |            | eastern chipmunk      | -4.93     | -4.51    | -2.69    | -0.94    | -0.59     |
|                       |            | elk                   | -6.64     | -6.11    | -3.84    | -1.59    | -1.03     |
|                       |            | flying squirrel sp    | -7.00     | -6.51    | -4.46    | -2.50    | -2.11     |
|                       |            | fox squirrel          | -3.80     | -3.70    | -3.14    | -2.66    | -2.57     |
|                       |            | gray fox              | -4.39     | -4.25    | -3.62    | -3.06    | -2.95     |
|                       |            | gray squirrel sp      | -1.75     | -1.68    | -1.39    | -1.11    | -1.06     |
|                       |            | mule deer             | -7.61     | -7.23    | -5.60    | -4.39    | -4.20     |
|                       |            | north american badger | -8.12     | -7.58    | -5.18    | -2.80    | -2.26     |
|                       |            | north american beaver | -7.13     | -6.65    | -4.55    | -2.49    | -2.09     |
|                       |            | north american mink   | -6.29     | -5.65    | -3.15    | -1.04    | -0.60     |

**Table S25:** Species and city-specific occupancy parameters. Note that all of these species do not likely reside in this city (that is controlled by another level of the model). (continued)

| City | Parameter         | Species               | CI(0.025)     | CI(0.05) | Estimate | CI(0.95) | CI(0.975) |      |
|------|-------------------|-----------------------|---------------|----------|----------|----------|-----------|------|
| gent |                   | raccoon               | -0.25         | -0.19    | 0.09     | 0.40     | 0.46      |      |
|      |                   | red fox               | -5.43         | -5.18    | -4.12    | -3.27    | -3.10     |      |
|      |                   | red squirrel          | -7.26         | -6.46    | -3.35    | -0.77    | -0.17     |      |
|      |                   | striped skunk         | -1.80         | -1.74    | -1.44    | -1.14    | -1.08     |      |
|      |                   | virginia opossum      | -2.90         | -2.82    | -2.43    | -2.08    | -2.01     |      |
|      |                   | white tailed deer     | -3.53         | -3.42    | -2.86    | -2.36    | -2.27     |      |
|      |                   | woodchuck             | -4.72         | -4.34    | -2.52    | -0.79    | -0.43     |      |
|      |                   | armadillo             | -1.00         | -0.87    | -0.20    | 0.47     | 0.63      |      |
|      |                   | bobcat                | -0.77         | -0.63    | 0.01     | 0.64     | 0.79      |      |
|      |                   | cottontail sp         | -0.41         | -0.29    | 0.22     | 0.70     | 0.82      |      |
|      |                   | coyote                | -0.44         | -0.35    | 0.06     | 0.47     | 0.55      |      |
|      |                   | eastern chipmunk      | -0.71         | -0.57    | 0.08     | 0.69     | 0.83      |      |
|      |                   | elk                   | -1.38         | -1.17    | -0.18    | 0.71     | 0.88      |      |
|      |                   | flying squirrel sp    | -1.24         | -1.04    | -0.19    | 0.65     | 0.82      |      |
|      |                   | fox squirrel          | -0.44         | -0.35    | 0.16     | 0.79     | 0.93      |      |
|      |                   | gray fox              | -0.63         | -0.49    | 0.14     | 0.78     | 0.89      |      |
|      |                   | gray squirrel sp      | -0.57         | -0.48    | -0.05    | 0.39     | 0.49      |      |
|      |                   | mule deer             | -0.80         | -0.66    | 0.01     | 0.67     | 0.83      |      |
|      |                   | north american badger | -0.89         | -0.72    | 0.06     | 0.85     | 1.00      |      |
|      |                   | north american beaver | -0.62         | -0.46    | 0.31     | 1.09     | 1.25      |      |
|      |                   | north american mink   | -0.77         | -0.61    | 0.13     | 0.86     | 1.01      |      |
|      | imp               |                       | raccoon       | -0.04    | 0.04     | 0.45     | 0.92      | 1.02 |
|      |                   |                       | red fox       | -0.54    | -0.42    | 0.14     | 0.69      | 0.80 |
|      |                   |                       | red squirrel  | -0.94    | -0.79    | -0.05    | 0.70      | 0.86 |
|      |                   |                       | striped skunk | -0.83    | -0.73    | -0.21    | 0.27      | 0.36 |
|      |                   | virginia opossum      | -0.19         | -0.10    | 0.36     | 0.90     | 1.01      |      |
|      |                   | white tailed deer     | -0.60         | -0.46    | 0.12     | 0.64     | 0.74      |      |
|      |                   | woodchuck             | -0.13         | 0.01     | 0.67     | 1.31     | 1.44      |      |
|      |                   | armadillo             | -7.38         | -6.46    | -3.08    | 0.42     | 1.21      |      |
|      |                   | bobcat                | -7.44         | -7.04    | -4.96    | -2.94    | -2.54     |      |
|      |                   | cottontail sp         | -1.83         | -1.47    | 0.35     | 2.20     | 2.60      |      |
|      |                   | coyote                | -2.72         | -2.54    | -1.62    | -0.72    | -0.55     |      |
|      |                   | eastern chipmunk      | -5.24         | -4.41    | -1.13    | 1.84     | 2.57      |      |
|      |                   | elk                   | -10.90        | -9.96    | -5.86    | -1.52    | -0.61     |      |
|      |                   | flying squirrel sp    | -4.28         | -3.52    | -0.07    | 3.25     | 4.01      |      |
|      |                   | fox squirrel          | -2.77         | -2.47    | -0.80    | 0.82     | 1.14      |      |
|      |                   | gray fox              | -2.32         | -1.95    | -0.04    | 2.07     | 2.51      |      |
|      |                   | gray squirrel sp      | 0.85          | 1.06     | 2.05     | 3.04     | 3.24      |      |
|      |                   | mule deer             | -7.73         | -7.04    | -4.07    | -0.90    | -0.24     |      |
|      |                   | north american badger | -8.17         | -7.18    | -2.88    | 1.67     | 2.72      |      |
|      |                   | north american beaver | -2.43         | -1.60    | 1.96     | 5.47     | 6.20      |      |
|      |                   | north american mink   | -3.17         | -2.30    | 0.99     | 4.24     | 4.89      |      |
|      |                   | raccoon               | 1.90          | 2.08     | 3.03     | 4.06     | 4.26      |      |
|      |                   | red fox               | -1.84         | -1.30    | 1.41     | 4.33     | 4.94      |      |
|      |                   | red squirrel          | -6.43         | -5.35    | -1.36    | 2.59     | 3.53      |      |
|      |                   | striped skunk         | -0.72         | -0.52    | 0.52     | 1.60     | 1.81      |      |
|      | virginia opossum  | -0.38                 | -0.11         | 1.19     | 2.56     | 2.83     |           |      |
|      | white tailed deer | -8.69                 | -8.33         | -6.58    | -4.99    | -4.66    |           |      |
|      | woodchuck         | -2.29                 | -1.56         | 1.56     | 4.56     | 5.19     |           |      |

**Table S25:** Species and city-specific occupancy parameters. Note that all of these species do not likely reside in this city (that is controlled by another level of the model). (continued)

| City               | Parameter             | Species               | CI(0.025) | CI(0.05) | Estimate | CI(0.95) | CI(0.975) |       |
|--------------------|-----------------------|-----------------------|-----------|----------|----------|----------|-----------|-------|
| Boston, MA         | gent X imp            | armadillo             | -6.40     | -5.40    | -2.02    | 1.35     | 2.46      |       |
|                    |                       | bobcat                | -4.07     | -3.37    | -0.50    | 2.44     | 3.12      |       |
|                    |                       | cottontail sp         | -3.97     | -3.42    | -1.14    | 1.07     | 1.62      |       |
|                    |                       | coyote                | -3.80     | -3.41    | -1.51    | 0.47     | 0.89      |       |
|                    |                       | eastern chipmunk      | -4.67     | -4.06    | -1.40    | 1.38     | 2.02      |       |
|                    |                       | elk                   | -4.89     | -4.11    | -1.08    | 2.06     | 2.87      |       |
|                    |                       | flying squirrel sp    | -4.75     | -4.09    | -1.22    | 1.68     | 2.44      |       |
|                    |                       | fox squirrel          | -3.00     | -2.51    | -0.20    | 2.36     | 2.95      |       |
|                    |                       | gray fox              | -4.58     | -3.59    | -0.27    | 2.52     | 3.07      |       |
|                    |                       | gray squirrel sp      | -3.77     | -3.37    | -1.40    | 0.74     | 1.20      |       |
|                    |                       | mule deer             | -5.07     | -4.37    | -1.35    | 1.69     | 2.46      |       |
|                    |                       | north american badger | -5.16     | -4.46    | -1.41    | 1.53     | 2.39      |       |
|                    |                       | north american beaver | -4.83     | -4.14    | -1.18    | 1.81     | 2.52      |       |
|                    |                       | north american mink   | -4.92     | -4.23    | -1.23    | 1.69     | 2.31      |       |
|                    |                       | raccoon               | -5.55     | -4.96    | -2.28    | 0.11     | 0.60      |       |
|                    |                       | red fox               | -4.91     | -4.30    | -1.65    | 0.86     | 1.44      |       |
|                    |                       | red squirrel          | -5.55     | -4.78    | -1.59    | 1.40     | 2.14      |       |
|                    |                       | striped skunk         | -5.73     | -5.03    | -2.03    | 0.41     | 0.93      |       |
|                    |                       | virginia opossum      | -3.91     | -3.38    | -1.06    | 0.96     | 1.30      |       |
|                    |                       | white tailed deer     | -4.38     | -3.80    | -1.06    | 1.48     | 2.10      |       |
|                    |                       | woodchuck             | -4.95     | -4.14    | -0.89    | 2.36     | 3.19      |       |
|                    |                       | intercept             | armadillo | -4.11    | -3.59    | -1.47    | 0.63      | 1.11  |
|                    |                       |                       | bobcat    | -4.98    | -4.54    | -2.56    | -0.66     | -0.30 |
|                    | cottontail sp         |                       | -0.87     | -0.78    | -0.33    | 0.12     | 0.21      |       |
|                    | coyote                |                       | -0.89     | -0.80    | -0.35    | 0.10     | 0.20      |       |
|                    | eastern chipmunk      |                       | -2.36     | -2.25    | -1.75    | -1.30    | -1.20     |       |
|                    | elk                   |                       | -6.55     | -6.02    | -3.81    | -1.60    | -1.07     |       |
|                    | flying squirrel sp    |                       | -6.14     | -5.81    | -4.31    | -3.07    | -2.83     |       |
|                    | fox squirrel          |                       | -6.96     | -6.07    | -1.75    | 1.43     | 2.08      |       |
|                    | gray fox              |                       | -3.07     | -2.87    | -1.87    | -0.67    | -0.34     |       |
|                    | gray squirrel sp      |                       | 0.36      | 0.45     | 0.95     | 1.50     | 1.59      |       |
|                    | mule deer             |                       | -5.86     | -5.17    | -2.01    | 1.03     | 1.69      |       |
|                    | north american badger |                       | -7.83     | -7.31    | -4.92    | -2.72    | -2.21     |       |
|                    | north american beaver |                       | -7.15     | -6.66    | -4.67    | -2.68    | -2.25     |       |
|                    | north american mink   |                       | -5.46     | -5.08    | -3.53    | -2.15    | -1.89     |       |
|                    | raccoon               |                       | -0.05     | 0.03     | 0.49     | 0.96     | 1.07      |       |
|                    | red fox               |                       | -2.63     | -2.50    | -1.84    | -1.19    | -1.06     |       |
|                    | red squirrel          |                       | -4.38     | -4.15    | -3.16    | -2.32    | -2.18     |       |
|                    | striped skunk         |                       | -3.25     | -3.08    | -2.19    | -1.29    | -1.08     |       |
|                    | virginia opossum      |                       | -2.38     | -2.27    | -1.74    | -1.24    | -1.15     |       |
|                    | white tailed deer     |                       | -0.82     | -0.73    | -0.26    | 0.22     | 0.31      |       |
|                    | woodchuck             | -4.32                 | -4.11     | -3.08    | -2.16    | -1.99    |           |       |
|                    | gent                  | armadillo             | -1.00     | -0.87    | -0.20    | 0.48     | 0.62      |       |
| bobcat             |                       | -0.74                 | -0.61     | 0.04     | 0.68     | 0.82     |           |       |
| cottontail sp      |                       | -0.03                 | 0.04      | 0.46     | 0.95     | 1.06     |           |       |
| coyote             |                       | -0.30                 | -0.21     | 0.24     | 0.76     | 0.87     |           |       |
| eastern chipmunk   |                       | -0.41                 | -0.30     | 0.23     | 0.82     | 0.95     |           |       |
| elk                |                       | -1.40                 | -1.18     | -0.19    | 0.70     | 0.86     |           |       |
| flying squirrel sp |                       | -1.24                 | -1.06     | -0.19    | 0.63     | 0.79     |           |       |

**Table S25:** Species and city-specific occupancy parameters. Note that all of these species do not likely reside in this city (that is controlled by another level of the model). (continued)

| City | Parameter  | Species               | CI(0.025) | CI(0.05) | Estimate | CI(0.95) | CI(0.975) |
|------|------------|-----------------------|-----------|----------|----------|----------|-----------|
|      |            | fox squirrel          | -0.70     | -0.58    | -0.03    | 0.55     | 0.69      |
|      |            | gray fox              | -0.71     | -0.56    | 0.12     | 0.76     | 0.90      |
|      |            | gray squirrel sp      | -0.46     | -0.37    | 0.11     | 0.71     | 0.84      |
|      |            | mule deer             | -0.78     | -0.65    | 0.03     | 0.71     | 0.86      |
|      |            | north american badger | -0.90     | -0.73    | 0.06     | 0.83     | 1.00      |
|      |            | north american beaver | -0.61     | -0.45    | 0.31     | 1.07     | 1.23      |
|      |            | north american mink   | -0.70     | -0.55    | 0.17     | 0.88     | 1.02      |
|      |            | raccoon               | -0.11     | -0.02    | 0.44     | 0.93     | 1.03      |
|      |            | red fox               | -0.57     | -0.44    | 0.12     | 0.64     | 0.76      |
|      |            | red squirrel          | -0.90     | -0.74    | -0.01    | 0.72     | 0.91      |
|      |            | striped skunk         | -0.89     | -0.75    | -0.19    | 0.35     | 0.48      |
|      |            | virginia opossum      | -0.45     | -0.34    | 0.16     | 0.70     | 0.83      |
|      |            | white tailed deer     | -0.27     | -0.17    | 0.32     | 0.84     | 0.95      |
|      |            | woodchuck             | -0.12     | 0.00     | 0.64     | 1.24     | 1.37      |
|      | imp        | armadillo             | -7.18     | -6.46    | -3.09    | 0.40     | 1.27      |
|      |            | bobcat                | -8.14     | -7.57    | -4.70    | -1.79    | -1.12     |
|      |            | cottontail sp         | -0.38     | -0.04    | 1.83     | 3.82     | 4.22      |
|      |            | coyote                | -2.69     | -2.38    | -0.66    | 1.14     | 1.51      |
|      |            | eastern chipmunk      | -2.56     | -2.20    | -0.26    | 1.71     | 2.17      |
|      |            | elk                   | -10.83    | -9.96    | -5.85    | -1.51    | -0.56     |
|      |            | flying squirrel sp    | -4.12     | -3.34    | -0.18    | 3.05     | 3.67      |
|      |            | fox squirrel          | -4.30     | -3.51    | -0.13    | 3.42     | 4.19      |
|      |            | gray fox              | -5.33     | -4.57    | -1.37    | 1.57     | 2.24      |
|      |            | gray squirrel sp      | 0.34      | 0.70     | 2.42     | 4.19     | 4.58      |
|      |            | mule deer             | -9.27     | -8.43    | -4.86    | -0.97    | 0.05      |
|      |            | north american badger | -8.40     | -7.40    | -2.95    | 1.68     | 2.90      |
|      |            | north american beaver | -2.38     | -1.61    | 1.96     | 5.56     | 6.37      |
|      |            | north american mink   | -2.17     | -1.60    | 1.44     | 4.67     | 5.43      |
|      |            | raccoon               | -1.19     | -0.81    | 1.08     | 2.98     | 3.33      |
|      |            | red fox               | -2.66     | -2.11    | 0.53     | 3.21     | 3.72      |
|      |            | red squirrel          | -7.06     | -6.19    | -2.54    | 0.42     | 0.94      |
|      |            | striped skunk         | -1.84     | -1.42    | 0.93     | 3.79     | 4.44      |
|      |            | virginia opossum      | -1.15     | -0.80    | 1.07     | 3.08     | 3.55      |
|      |            | white tailed deer     | -6.65     | -6.20    | -4.06    | -1.97    | -1.57     |
|      |            | woodchuck             | -1.28     | -0.75    | 1.93     | 4.77     | 5.41      |
|      | gent X imp | armadillo             | -6.33     | -5.43    | -2.06    | 1.38     | 2.60      |
|      |            | bobcat                | -4.07     | -3.39    | -0.46    | 2.47     | 3.25      |
|      |            | cottontail sp         | -3.36     | -2.92    | -0.89    | 1.11     | 1.56      |
|      |            | coyote                | -3.34     | -2.91    | -0.96    | 1.29     | 1.83      |
|      |            | eastern chipmunk      | -3.63     | -3.19    | -0.87    | 1.70     | 2.39      |
|      |            | elk                   | -4.87     | -4.17    | -1.11    | 1.91     | 2.68      |
|      |            | flying squirrel sp    | -4.94     | -4.21    | -1.25    | 1.63     | 2.29      |
|      |            | fox squirrel          | -3.84     | -3.20    | -0.62    | 2.01     | 2.63      |
|      |            | gray fox              | -4.06     | -3.17    | -0.04    | 2.86     | 3.45      |
|      |            | gray squirrel sp      | -3.81     | -3.38    | -1.19    | 1.41     | 2.05      |
|      |            | mule deer             | -5.10     | -4.31    | -1.33    | 1.70     | 2.46      |
|      |            | north american badger | -5.19     | -4.49    | -1.42    | 1.51     | 2.36      |
|      |            | north american beaver | -4.94     | -4.17    | -1.21    | 1.76     | 2.52      |
|      |            | north american mink   | -4.41     | -3.75    | -0.99    | 2.01     | 2.77      |

**Table S25:** Species and city-specific occupancy parameters. Note that all of these species do not likely reside in this city (that is controlled by another level of the model). (continued)

| City                  | Parameter             | Species               | CI(0.025) | CI(0.05) | Estimate | CI(0.95) | CI(0.975) |
|-----------------------|-----------------------|-----------------------|-----------|----------|----------|----------|-----------|
| Chicago, IL           | intercept             | raccoon               | -4.13     | -3.61    | -0.94    | 2.02     | 2.67      |
|                       |                       | red fox               | -5.50     | -4.80    | -1.96    | 0.49     | 1.01      |
|                       |                       | red squirrel          | -6.01     | -5.21    | -1.88    | 0.98     | 1.58      |
|                       |                       | striped skunk         | -5.10     | -4.42    | -1.52    | 1.20     | 1.86      |
|                       |                       | virginia opossum      | -4.13     | -3.53    | -1.14    | 1.05     | 1.48      |
|                       |                       | white tailed deer     | -3.14     | -2.73    | -0.48    | 2.02     | 2.58      |
|                       |                       | woodchuck             | -4.74     | -3.98    | -0.87    | 2.30     | 3.12      |
|                       |                       | armadillo             | -4.01     | -3.56    | -1.46    | 0.60     | 1.10      |
|                       |                       | bobcat                | -4.98     | -4.47    | -2.48    | -0.64    | -0.22     |
|                       |                       | cottontail sp         | -0.87     | -0.84    | -0.65    | -0.48    | -0.45     |
|                       |                       | coyote                | -0.74     | -0.70    | -0.51    | -0.32    | -0.28     |
|                       |                       | eastern chipmunk      | -3.55     | -3.48    | -3.11    | -2.77    | -2.71     |
|                       |                       | elk                   | -6.56     | -6.02    | -3.78    | -1.56    | -1.05     |
|                       |                       | flying squirrel sp    | -4.45     | -4.32    | -3.56    | -2.80    | -2.66     |
|                       |                       | fox squirrel          | -1.01     | -0.97    | -0.79    | -0.61    | -0.57     |
|                       |                       | gray fox              | -6.59     | -6.33    | -4.91    | -3.37    | -3.08     |
|                       |                       | gray squirrel sp      | 0.60      | 0.64     | 0.85     | 1.06     | 1.10      |
|                       |                       | mule deer             | -5.88     | -5.24    | -2.02    | 1.03     | 1.71      |
|                       |                       | north american badger | -8.60     | -8.00    | -5.64    | -3.17    | -2.69     |
|                       |                       | north american beaver | -7.09     | -6.78    | -5.33    | -4.05    | -3.81     |
|                       | north american mink   | -3.94                 | -3.81     | -3.11    | -2.33    | -2.18    |           |
|                       | raccoon               | -0.16                 | -0.13     | 0.05     | 0.23     | 0.27     |           |
|                       | red fox               | -4.39                 | -4.28     | -3.73    | -3.23    | -3.13    |           |
|                       | red squirrel          | -9.14                 | -8.33     | -4.50    | -1.33    | -0.78    |           |
|                       | striped skunk         | -2.22                 | -2.18     | -1.94    | -1.71    | -1.67    |           |
|                       | virginia opossum      | -0.68                 | -0.65     | -0.47    | -0.29    | -0.26    |           |
|                       | white tailed deer     | -1.49                 | -1.45     | -1.22    | -1.01    | -0.96    |           |
|                       | woodchuck             | -5.48                 | -5.26     | -4.18    | -2.96    | -2.71    |           |
|                       | gent                  | armadillo             | -1.01     | -0.88    | -0.19    | 0.49     | 0.63      |
|                       | bobcat                | -0.76                 | -0.62     | 0.03     | 0.69     | 0.82     |           |
|                       | cottontail sp         | 0.09                  | 0.13      | 0.39     | 0.65     | 0.70     |           |
|                       | coyote                | -0.55                 | -0.49     | -0.19    | 0.10     | 0.15     |           |
|                       | eastern chipmunk      | -0.35                 | -0.26     | 0.20     | 0.67     | 0.76     |           |
|                       | elk                   | -1.38                 | -1.18     | -0.20    | 0.71     | 0.87     |           |
|                       | flying squirrel sp    | -1.21                 | -1.04     | -0.19    | 0.61     | 0.78     |           |
|                       | fox squirrel          | -0.67                 | -0.62     | -0.31    | -0.02    | 0.04     |           |
|                       | gray fox              | -0.69                 | -0.55     | 0.12     | 0.76     | 0.90     |           |
|                       | gray squirrel sp      | -0.46                 | -0.41     | -0.12    | 0.17     | 0.23     |           |
|                       | mule deer             | -0.79                 | -0.65     | 0.03     | 0.70     | 0.86     |           |
|                       | north american badger | -0.90                 | -0.74     | 0.05     | 0.84     | 0.99     |           |
| north american beaver | -0.68                 | -0.52                 | 0.26      | 1.01     | 1.16     |          |           |
| north american mink   | -0.77                 | -0.63                 | 0.08      | 0.77     | 0.91     |          |           |
| raccoon               | -0.12                 | -0.07                 | 0.21      | 0.50     | 0.55     |          |           |
| red fox               | -0.42                 | -0.30                 | 0.19      | 0.68     | 0.78     |          |           |
| red squirrel          | -0.96                 | -0.81                 | -0.05     | 0.69     | 0.86     |          |           |
| striped skunk         | -0.38                 | -0.33                 | 0.02      | 0.39     | 0.46     |          |           |
| virginia opossum      | -0.14                 | -0.09                 | 0.17      | 0.44     | 0.49     |          |           |
| white tailed deer     | -0.28                 | -0.22                 | 0.12      | 0.43     | 0.49     |          |           |
| woodchuck             | -0.12                 | 0.01                  | 0.63      | 1.24     | 1.36     |          |           |

**Table S25:** Species and city-specific occupancy parameters. Note that all of these species do not likely reside in this city (that is controlled by another level of the model). (continued)

| City               | Parameter             | Species               | CI(0.025) | CI(0.05) | Estimate | CI(0.95) | CI(0.975) |      |
|--------------------|-----------------------|-----------------------|-----------|----------|----------|----------|-----------|------|
| Denver, CO         | imp                   | armadillo             | -7.32     | -6.50    | -3.13    | 0.41     | 1.22      |      |
|                    |                       | bobcat                | -8.15     | -7.51    | -4.71    | -1.80    | -1.16     |      |
|                    |                       | cottontail sp         | 1.70      | 1.83     | 2.64     | 3.48     | 3.66      |      |
|                    |                       | coyote                | -2.44     | -2.29    | -1.51    | -0.72    | -0.57     |      |
|                    |                       | eastern chipmunk      | -3.72     | -3.46    | -1.98    | -0.61    | -0.31     |      |
|                    |                       | elk                   | -10.87    | -10.00   | -5.85    | -1.66    | -0.52     |      |
|                    |                       | flying squirrel sp    | -4.23     | -3.62    | -1.06    | 1.35     | 1.81      |      |
|                    |                       | fox squirrel          | -2.17     | -2.01    | -1.19    | -0.40    | -0.23     |      |
|                    |                       | gray fox              | -6.69     | -5.87    | -2.49    | 0.31     | 0.89      |      |
|                    |                       | gray squirrel sp      | 1.58      | 1.72     | 2.54     | 3.41     | 3.55      |      |
|                    |                       | mule deer             | -9.20     | -8.42    | -4.86    | -1.05    | -0.16     |      |
|                    |                       | north american badger | -7.86     | -6.94    | -2.80    | 1.71     | 2.82      |      |
|                    |                       | north american beaver | -2.33     | -1.59    | 1.69     | 4.83     | 5.44      |      |
|                    |                       | north american mink   | -3.53     | -2.98    | -0.26    | 2.05     | 2.52      |      |
|                    |                       | raccoon               | -2.85     | -2.69    | -1.90    | -1.12    | -0.96     |      |
|                    |                       | red fox               | -1.81     | -1.38    | 0.76     | 2.85     | 3.29      |      |
|                    |                       | red squirrel          | -5.91     | -5.06    | -1.25    | 2.53     | 3.45      |      |
|                    |                       | striped skunk         | -1.94     | -1.75    | -0.74    | 0.27     | 0.46      |      |
|                    |                       | virginia opossum      | -1.41     | -1.27    | -0.53    | 0.22     | 0.36      |      |
|                    |                       | white tailed deer     | -7.84     | -7.60    | -6.39    | -5.24    | -5.03     |      |
|                    |                       | woodchuck             | -2.39     | -1.76    | 0.97     | 3.45     | 3.99      |      |
|                    |                       | gent X imp            | armadillo | -6.43    | -5.54    | -2.03    | 1.40      | 2.58 |
|                    |                       | bobcat                | -4.17     | -3.38    | -0.47    | 2.47     | 3.23      |      |
|                    |                       | cottontail sp         | -2.51     | -2.30    | -1.10    | 0.08     | 0.32      |      |
|                    | coyote                | -3.37                 | -3.10     | -1.75    | -0.46    | -0.20    |           |      |
|                    | eastern chipmunk      | -4.51                 | -4.04     | -1.90    | 0.05     | 0.47     |           |      |
|                    | elk                   | -4.86                 | -4.14     | -1.08    | 1.94     | 2.78     |           |      |
|                    | flying squirrel sp    | -4.73                 | -4.11     | -1.25    | 1.47     | 2.01     |           |      |
|                    | fox squirrel          | -2.36                 | -2.08     | -0.74    | 0.58     | 0.84     |           |      |
|                    | gray fox              | -3.63                 | -2.90     | 0.08     | 2.94     | 3.57     |           |      |
|                    | gray squirrel sp      | -3.68                 | -3.45     | -2.14    | -0.89    | -0.65    |           |      |
|                    | mule deer             | -5.21                 | -4.38     | -1.33    | 1.71     | 2.54     |           |      |
|                    | north american badger | -4.96                 | -4.34     | -1.38    | 1.62     | 2.26     |           |      |
|                    | north american beaver | -4.92                 | -4.17     | -1.23    | 1.58     | 2.27     |           |      |
|                    | north american mink   | -4.67                 | -4.03     | -1.27    | 1.40     | 2.01     |           |      |
|                    | raccoon               | -4.00                 | -3.75     | -2.31    | -0.94    | -0.66    |           |      |
|                    | red fox               | -4.19                 | -3.75     | -1.51    | 0.75     | 1.22     |           |      |
|                    | red squirrel          | -5.42                 | -4.69     | -1.57    | 1.37     | 2.13     |           |      |
|                    | striped skunk         | -4.91                 | -4.54     | -2.66    | -0.98    | -0.66    |           |      |
|                    | virginia opossum      | -2.65                 | -2.42     | -1.20    | -0.03    | 0.19     |           |      |
|                    | white tailed deer     | -2.63                 | -2.32     | -0.62    | 1.13     | 1.49     |           |      |
|                    | woodchuck             | -6.15                 | -5.16     | -1.51    | 1.30     | 1.93     |           |      |
|                    | intercept             | armadillo             | -4.11     | -3.57    | -1.44    | 0.60     | 1.10      |      |
|                    | bobcat                | -4.09                 | -3.88     | -2.66    | -1.23    | -0.93    |           |      |
|                    | cottontail sp         | -2.03                 | -1.94     | -1.52    | -1.14    | -1.07    |           |      |
|                    | coyote                | -0.81                 | -0.73     | -0.29    | 0.17     | 0.28     |           |      |
|                    | eastern chipmunk      | -5.20                 | -4.73     | -2.75    | -0.94    | -0.58    |           |      |
| elk                | -4.55                 | -4.33                 | -3.26     | -2.22    | -2.03    |          |           |      |
| flying squirrel sp | -6.82                 | -6.39                 | -4.36     | -2.44    | -2.04    |          |           |      |

**Table S25:** Species and city-specific occupancy parameters. Note that all of these species do not likely reside in this city (that is controlled by another level of the model). (continued)

| City | Parameter | Species               | CI(0.025) | CI(0.05) | Estimate | CI(0.95) | CI(0.975) |
|------|-----------|-----------------------|-----------|----------|----------|----------|-----------|
|      |           | fox squirrel          | 0.32      | 0.39     | 0.77     | 1.17     | 1.25      |
|      |           | gray fox              | -7.68     | -7.11    | -4.68    | -1.84    | -1.25     |
|      |           | gray squirrel sp      | -2.23     | -1.77    | 0.31     | 2.43     | 2.83      |
|      |           | mule deer             | -2.64     | -2.52    | -2.01    | -1.53    | -1.44     |
|      |           | north american badger | -8.23     | -7.67    | -5.46    | -3.77    | -3.44     |
|      |           | north american beaver | -5.50     | -5.23    | -3.88    | -2.56    | -2.29     |
|      |           | north american mink   | -6.56     | -6.08    | -3.89    | -1.72    | -1.31     |
|      |           | raccoon               | -1.11     | -1.04    | -0.68    | -0.33    | -0.26     |
|      |           | red fox               | -1.06     | -0.97    | -0.54    | -0.07    | 0.02      |
|      |           | red squirrel          | -5.39     | -5.09    | -3.77    | -2.67    | -2.48     |
|      |           | striped skunk         | -2.96     | -2.85    | -2.26    | -1.72    | -1.62     |
|      |           | virginia opossum      | -5.22     | -4.98    | -3.80    | -2.80    | -2.62     |
|      |           | white tailed deer     | -6.16     | -5.84    | -4.44    | -3.25    | -3.00     |
|      |           | woodchuck             | -4.82     | -4.36    | -2.54    | -0.77    | -0.37     |
|      | gent      | armadillo             | -1.01     | -0.88    | -0.20    | 0.48     | 0.63      |
|      |           | bobcat                | -0.62     | -0.51    | 0.10     | 0.73     | 0.89      |
|      |           | cottontail sp         | -0.13     | -0.04    | 0.36     | 0.79     | 0.89      |
|      |           | coyote                | -0.21     | -0.12    | 0.30     | 0.82     | 0.92      |
|      |           | eastern chipmunk      | -0.72     | -0.57    | 0.08     | 0.69     | 0.82      |
|      |           | elk                   | -1.43     | -1.21    | -0.26    | 0.62     | 0.78      |
|      |           | flying squirrel sp    | -1.22     | -1.05    | -0.18    | 0.64     | 0.81      |
|      |           | fox squirrel          | -0.57     | -0.48    | -0.06    | 0.37     | 0.45      |
|      |           | gray fox              | -0.66     | -0.52    | 0.14     | 0.80     | 0.95      |
|      |           | gray squirrel sp      | -0.75     | -0.63    | -0.09    | 0.48     | 0.62      |
|      |           | mule deer             | -0.53     | -0.42    | 0.13     | 0.71     | 0.83      |
|      |           | north american badger | -0.91     | -0.74    | 0.05     | 0.83     | 0.98      |
|      |           | north american beaver | -0.70     | -0.53    | 0.26     | 1.01     | 1.16      |
|      |           | north american mink   | -0.80     | -0.63    | 0.11     | 0.83     | 0.96      |
|      |           | raccoon               | -0.34     | -0.24    | 0.21     | 0.60     | 0.67      |
|      |           | red fox               | -0.48     | -0.37    | 0.09     | 0.51     | 0.60      |
|      |           | red squirrel          | -1.01     | -0.85    | -0.10    | 0.64     | 0.79      |
|      |           | striped skunk         | -0.74     | -0.63    | -0.10    | 0.45     | 0.58      |
|      |           | virginia opossum      | -0.74     | -0.60    | 0.01     | 0.54     | 0.65      |
|      |           | white tailed deer     | -0.41     | -0.30    | 0.25     | 0.81     | 0.93      |
|      |           | woodchuck             | -0.13     | 0.02     | 0.67     | 1.30     | 1.43      |
|      | imp       | armadillo             | -7.28     | -6.47    | -3.09    | 0.45     | 1.22      |
|      |           | bobcat                | -7.07     | -6.49    | -3.91    | -0.82    | -0.07     |
|      |           | cottontail sp         | -2.57     | -2.20    | -0.26    | 1.62     | 1.94      |
|      |           | coyote                | -1.93     | -1.54    | 0.48     | 2.71     | 3.19      |
|      |           | eastern chipmunk      | -5.11     | -4.40    | -1.16    | 1.95     | 2.72      |
|      |           | elk                   | -10.88    | -10.08   | -6.36    | -2.86    | -2.20     |
|      |           | flying squirrel sp    | -4.33     | -3.53    | -0.14    | 3.23     | 3.93      |
|      |           | fox squirrel          | -0.77     | -0.38    | 1.57     | 3.57     | 3.94      |
|      |           | gray fox              | -5.59     | -4.83    | -1.42    | 1.97     | 2.63      |
|      |           | gray squirrel sp      | -0.75     | -0.29    | 2.01     | 4.36     | 4.90      |
|      |           | mule deer             | -8.06     | -7.57    | -5.17    | -2.90    | -2.47     |
|      |           | north american badger | -7.93     | -7.03    | -2.85    | 1.59     | 2.72      |
|      |           | north american beaver | -2.24     | -1.42    | 1.97     | 5.31     | 6.03      |
|      |           | north american mink   | -3.17     | -2.34    | 1.00     | 4.12     | 4.80      |

**Table S25:** Species and city-specific occupancy parameters. Note that all of these species do not likely reside in this city (that is controlled by another level of the model). (continued)

| City                  | Parameter  | Species               | CI(0.025) | CI(0.05)         | Estimate | CI(0.95) | CI(0.975) |       |       |
|-----------------------|------------|-----------------------|-----------|------------------|----------|----------|-----------|-------|-------|
|                       | gent X imp | raccoon               | -0.02     | 0.31             | 2.20     | 4.28     | 4.71      |       |       |
|                       |            | red fox               | 0.65      | 1.06             | 3.49     | 6.23     | 6.81      |       |       |
|                       |            | red squirrel          | -3.60     | -3.05            | 0.20     | 4.66     | 5.81      |       |       |
|                       |            | striped skunk         | -3.80     | -3.30            | -0.88    | 1.24     | 1.67      |       |       |
|                       |            | virginia opossum      | -2.54     | -2.01            | 0.36     | 2.87     | 3.37      |       |       |
|                       |            | white tailed deer     | -10.55    | -9.72            | -6.22    | -3.07    | -2.44     |       |       |
|                       |            | woodchuck             | -2.38     | -1.61            | 1.52     | 4.65     | 5.32      |       |       |
|                       |            | armadillo             | -6.36     | -5.44            | -1.99    | 1.35     | 2.44      |       |       |
|                       |            | bobcat                | -3.60     | -2.92            | -0.21    | 2.80     | 3.58      |       |       |
|                       |            | cottontail sp         | -3.45     | -2.99            | -0.98    | 1.11     | 1.54      |       |       |
|                       |            | coyote                | -3.28     | -2.90            | -0.94    | 1.46     | 2.02      |       |       |
|                       |            | eastern chipmunk      | -4.79     | -4.14            | -1.40    | 1.31     | 2.04      |       |       |
|                       |            | elk                   | -4.54     | -3.86            | -0.97    | 2.20     | 2.98      |       |       |
|                       |            | flying squirrel sp    | -4.89     | -4.21            | -1.20    | 1.70     | 2.44      |       |       |
|                       |            | fox squirrel          | -2.59     | -2.15            | -0.01    | 2.52     | 3.20      |       |       |
|                       |            | gray fox              | -3.87     | -3.00            | 0.07     | 2.97     | 3.60      |       |       |
|                       |            | gray squirrel sp      | -4.64     | -4.10            | -1.69    | 0.89     | 1.50      |       |       |
|                       |            | mule deer             | -4.02     | -3.49            | -0.95    | 1.97     | 2.62      |       |       |
|                       |            | north american badger | -5.04     | -4.42            | -1.41    | 1.57     | 2.32      |       |       |
|                       |            | north american beaver | -4.87     | -4.15            | -1.23    | 1.65     | 2.27      |       |       |
|                       |            | north american mink   | -4.88     | -4.17            | -1.23    | 1.60     | 2.27      |       |       |
|                       |            | raccoon               | -3.31     | -2.79            | -0.15    | 3.00     | 3.74      |       |       |
|                       |            | red fox               | -4.02     | -3.53            | -1.27    | 1.21     | 1.74      |       |       |
|                       |            | red squirrel          | -5.50     | -4.72            | -1.61    | 1.38     | 2.10      |       |       |
|                       |            | striped skunk         | -5.52     | -4.62            | -1.58    | 1.22     | 1.90      |       |       |
|                       |            | virginia opossum      | -3.75     | -3.18            | -0.72    | 1.62     | 2.15      |       |       |
|                       |            | white tailed deer     | -4.93     | -4.21            | -1.37    | 1.10     | 1.61      |       |       |
|                       |            | woodchuck             | -5.00     | -4.14            | -0.89    | 2.33     | 3.13      |       |       |
|                       |            | Houston, TX           | intercept | armadillo        | -1.47    | -1.36    | -0.88     | -0.41 | -0.32 |
|                       |            |                       |           | bobcat           | -2.50    | -2.36    | -1.64     | -0.84 | -0.65 |
|                       |            |                       |           | cottontail sp    | -1.27    | -1.20    | -0.77     | -0.35 | -0.27 |
|                       |            |                       |           | coyote           | -0.77    | -0.67    | -0.11     | 0.52  | 0.67  |
|                       |            |                       |           | eastern chipmunk | -5.37    | -4.91    | -2.82     | -1.00 | -0.64 |
|                       |            |                       |           | elk              | -6.75    | -6.21    | -3.89     | -1.54 | -0.98 |
| flying squirrel sp    | -7.09      |                       |           | -6.66            | -4.71    | -2.95    | -2.54     |       |       |
| fox squirrel          | 0.04       |                       |           | 0.12             | 0.59     | 1.10     | 1.21      |       |       |
| gray fox              | -4.63      |                       |           | -4.43            | -3.38    | -2.52    | -2.36     |       |       |
| gray squirrel sp      | 0.24       |                       |           | 0.32             | 0.79     | 1.28     | 1.38      |       |       |
| mule deer             | -5.87      |                       |           | -5.20            | -2.01    | 1.07     | 1.76      |       |       |
| north american badger | -8.00      |                       |           | -7.48            | -5.16    | -2.93    | -2.47     |       |       |
| north american beaver | -7.18      |                       |           | -6.72            | -4.64    | -2.70    | -2.24     |       |       |
| north american mink   | -6.03      |                       |           | -5.44            | -3.14    | -1.05    | -0.64     |       |       |
| raccoon               | -0.48      |                       |           | -0.40            | 0.03     | 0.44     | 0.52      |       |       |
| red fox               | -6.60      |                       |           | -5.96            | -2.08    | 1.36     | 1.98      |       |       |
| red squirrel          | -7.28      |                       |           | -6.52            | -3.35    | -0.83    | -0.29     |       |       |
| striped skunk         | -3.44      |                       |           | -3.32            | -2.66    | -2.06    | -1.95     |       |       |
| virginia opossum      | 0.22       |                       |           | 0.31             | 0.82     | 1.35     | 1.45      |       |       |
| white tailed deer     | -4.68      |                       |           | -4.48            | -3.51    | -2.72    | -2.57     |       |       |
| woodchuck             | -4.80      | -4.37                 | -2.52     | -0.75            | -0.38    |          |           |       |       |



**Table S25:** Species and city-specific occupancy parameters. Note that all of these species do not likely reside in this city (that is controlled by another level of the model). (continued)

| City | Parameter             | Species               | CI(0.025)     | CI(0.05) | Estimate | CI(0.95) | CI(0.975) |       |
|------|-----------------------|-----------------------|---------------|----------|----------|----------|-----------|-------|
|      | gent                  | armadillo             | -1.00         | -0.87    | -0.23    | 0.40     | 0.52      |       |
|      |                       | bobcat                | -0.67         | -0.53    | 0.09     | 0.72     | 0.85      |       |
|      |                       | cottontail sp         | -0.31         | -0.20    | 0.25     | 0.69     | 0.78      |       |
|      |                       | coyote                | -0.63         | -0.51    | 0.03     | 0.52     | 0.64      |       |
|      |                       | eastern chipmunk      | -0.69         | -0.57    | 0.08     | 0.69     | 0.84      |       |
|      |                       | elk                   | -1.42         | -1.18    | -0.18    | 0.70     | 0.90      |       |
|      |                       | flying squirrel sp    | -1.23         | -1.06    | -0.19    | 0.65     | 0.81      |       |
|      |                       | fox squirrel          | -0.56         | -0.47    | 0.03     | 0.61     | 0.72      |       |
|      |                       | gray fox              | -0.68         | -0.54    | 0.12     | 0.75     | 0.88      |       |
|      |                       | gray squirrel sp      | -0.85         | -0.74    | -0.20    | 0.29     | 0.39      |       |
|      |                       | mule deer             | -0.81         | -0.65    | 0.03     | 0.72     | 0.87      |       |
|      |                       | north american badger | -0.90         | -0.74    | 0.06     | 0.85     | 0.99      |       |
|      |                       | north american beaver | -0.61         | -0.46    | 0.31     | 1.06     | 1.22      |       |
|      |                       | north american mink   | -0.77         | -0.62    | 0.13     | 0.86     | 0.99      |       |
|      |                       | raccoon               | -0.18         | -0.09    | 0.37     | 0.85     | 0.96      |       |
|      |                       | red fox               | -0.51         | -0.38    | 0.18     | 0.74     | 0.86      |       |
|      |                       | red squirrel          | -0.96         | -0.80    | -0.06    | 0.71     | 0.88      |       |
|      |                       | striped skunk         | -0.98         | -0.84    | -0.24    | 0.31     | 0.44      |       |
|      |                       | virginia opossum      | -0.59         | -0.49    | 0.06     | 0.56     | 0.66      |       |
|      |                       | white tailed deer     | -0.57         | -0.43    | 0.15     | 0.69     | 0.81      |       |
|      |                       | woodchuck             | -0.11         | 0.02     | 0.67     | 1.30     | 1.44      |       |
|      |                       | imp                   | armadillo     | -7.20    | -6.78    | -4.52    | -2.54     | -2.15 |
|      |                       |                       | bobcat        | -9.23    | -8.55    | -5.79    | -3.52     | -3.11 |
|      |                       |                       | cottontail sp | -2.57    | -2.25    | -0.59    | 1.06      | 1.33  |
|      |                       |                       | coyote        | -5.50    | -5.00    | -2.76    | -0.77     | -0.40 |
|      | eastern chipmunk      |                       | -5.04         | -4.33    | -1.09    | 1.99     | 2.72      |       |
|      | elk                   |                       | -10.72        | -9.89    | -5.89    | -1.64    | -0.65     |       |
|      | flying squirrel sp    |                       | -4.28         | -3.48    | -0.06    | 3.18     | 3.96      |       |
|      | fox squirrel          |                       | 0.44          | 0.76     | 2.71     | 4.81     | 5.22      |       |
|      | gray fox              |                       | -5.10         | -4.47    | -1.54    | 1.37     | 2.02      |       |
|      | gray squirrel sp      |                       | 0.11          | 0.43     | 1.98     | 3.54     | 3.84      |       |
|      | mule deer             |                       | -9.31         | -8.46    | -4.87    | -1.00    | 0.03      |       |
|      | north american badger |                       | -8.06         | -7.11    | -2.91    | 1.49     | 2.68      |       |
|      | north american beaver |                       | -2.39         | -1.57    | 1.99     | 5.40     | 6.09      |       |
|      | north american mink   |                       | -3.17         | -2.35    | 1.00     | 4.12     | 4.84      |       |
|      | raccoon               |                       | -4.13         | -3.75    | -1.86    | -0.14    | 0.15      |       |
|      | red fox               |                       | -3.88         | -2.92    | 0.81     | 4.62     | 5.44      |       |
|      | red squirrel          |                       | -6.43         | -5.34    | -1.40    | 2.50     | 3.41      |       |
|      | striped skunk         |                       | -4.94         | -4.25    | -1.76    | 0.32     | 0.75      |       |
|      | virginia opossum      |                       | -3.65         | -3.25    | -1.42    | 0.28     | 0.60      |       |
|      | white tailed deer     |                       | -8.79         | -8.22    | -5.24    | -2.36    | -1.76     |       |
|      | woodchuck             |                       | -2.29         | -1.55    | 1.54     | 4.61     | 5.28      |       |
|      | gent X imp            |                       | armadillo     | -7.67    | -6.45    | -2.76    | -0.18     | 0.33  |
|      |                       |                       | bobcat        | -3.71    | -3.11    | -0.39    | 2.45      | 3.08  |
|      |                       |                       | cottontail sp | -3.46    | -3.09    | -1.12    | 0.78      | 1.17  |
|      |                       |                       | coyote        | -5.13    | -4.51    | -2.08    | 0.05      | 0.48  |
|      |                       | eastern chipmunk      | -4.78         | -4.09    | -1.38    | 1.33     | 1.95      |       |
|      |                       | elk                   | -4.82         | -4.10    | -1.04    | 2.01     | 2.87      |       |
|      |                       | flying squirrel sp    | -4.80         | -4.14    | -1.23    | 1.81     | 2.56      |       |

**Table S25:** Species and city-specific occupancy parameters. Note that all of these species do not likely reside in this city (that is controlled by another level of the model). (continued)

| City                  | Parameter             | Species               | CI(0.025) | CI(0.05) | Estimate | CI(0.95) | CI(0.975) |
|-----------------------|-----------------------|-----------------------|-----------|----------|----------|----------|-----------|
| Indianapolis, IN      | intercept             | fox squirrel          | -3.10     | -2.65    | -0.40    | 1.99     | 2.51      |
|                       |                       | gray fox              | -3.69     | -2.87    | 0.11     | 2.89     | 3.52      |
|                       |                       | gray squirrel sp      | -5.02     | -4.51    | -2.14    | -0.03    | 0.37      |
|                       |                       | mule deer             | -5.06     | -4.27    | -1.31    | 1.72     | 2.54      |
|                       |                       | north american badger | -5.16     | -4.37    | -1.36    | 1.66     | 2.42      |
|                       |                       | north american beaver | -4.75     | -4.07    | -1.19    | 1.63     | 2.33      |
|                       |                       | north american mink   | -4.87     | -4.15    | -1.22    | 1.69     | 2.35      |
|                       |                       | raccoon               | -3.80     | -3.26    | -0.69    | 2.06     | 2.64      |
|                       |                       | red fox               | -4.74     | -4.12    | -1.51    | 1.14     | 1.78      |
|                       |                       | red squirrel          | -5.46     | -4.74    | -1.56    | 1.51     | 2.39      |
|                       |                       | striped skunk         | -4.67     | -3.97    | -1.22    | 1.70     | 2.38      |
|                       |                       | virginia opossum      | -2.57     | -2.13    | -0.09    | 2.19     | 2.70      |
|                       |                       | white tailed deer     | -3.72     | -3.16    | -0.70    | 1.98     | 2.68      |
|                       |                       | woodchuck             | -5.06     | -4.23    | -0.89    | 2.36     | 3.19      |
|                       |                       | armadillo             | -4.05     | -3.55    | -1.44    | 0.62     | 1.04      |
|                       |                       | bobcat                | -6.15     | -5.67    | -3.04    | -0.87    | -0.50     |
|                       |                       | cottontail sp         | -0.52     | -0.48    | -0.22    | 0.02     | 0.07      |
|                       |                       | coyote                | -0.63     | -0.57    | -0.30    | -0.02    | 0.03      |
|                       |                       | eastern chipmunk      | -3.62     | -3.52    | -3.06    | -2.65    | -2.57     |
|                       |                       | elk                   | -6.57     | -6.02    | -3.78    | -1.53    | -0.96     |
|                       | flying squirrel sp    | -7.48                 | -7.08     | -5.32    | -3.83    | -3.54    |           |
|                       | fox squirrel          | 0.46                  | 0.52      | 0.83     | 1.15     | 1.21     |           |
|                       | gray fox              | -8.23                 | -7.72     | -5.51    | -2.71    | -1.97    |           |
|                       | gray squirrel sp      | -2.46                 | -2.39     | -2.06    | -1.76    | -1.71    |           |
|                       | mule deer             | -5.81                 | -5.10     | -2.02    | 0.99     | 1.65     |           |
|                       | north american badger | -7.25                 | -6.87     | -5.22    | -3.80    | -3.49    |           |
|                       | north american beaver | -5.14                 | -4.96     | -4.03    | -3.16    | -3.00    |           |
|                       | north american mink   | -3.60                 | -3.47     | -2.75    | -1.98    | -1.81    |           |
|                       | raccoon               | 0.72                  | 0.78      | 1.13     | 1.48     | 1.55     |           |
|                       | red fox               | -1.93                 | -1.86     | -1.56    | -1.28    | -1.22    |           |
|                       | red squirrel          | -2.45                 | -2.38     | -2.03    | -1.70    | -1.65    |           |
|                       | striped skunk         | -4.82                 | -4.63     | -3.57    | -2.45    | -2.22    |           |
|                       | virginia opossum      | -0.14                 | -0.09     | 0.17     | 0.44     | 0.49     |           |
|                       | white tailed deer     | -1.01                 | -0.96     | -0.69    | -0.42    | -0.37    |           |
|                       | woodchuck             | -3.19                 | -3.09     | -2.63    | -2.19    | -2.11    |           |
|                       | gent                  | armadillo             | -1.02     | -0.88    | -0.20    | 0.48     | 0.63      |
|                       | bobcat                | -0.75                 | -0.61     | 0.03     | 0.67     | 0.81     |           |
|                       | cottontail sp         | -0.46                 | -0.38     | -0.02    | 0.32     | 0.37     |           |
|                       | coyote                | -0.37                 | -0.29     | 0.06     | 0.41     | 0.49     |           |
|                       | eastern chipmunk      | -0.41                 | -0.31     | 0.18     | 0.71     | 0.82     |           |
| elk                   | -1.40                 | -1.17                 | -0.19     | 0.69     | 0.85     |          |           |
| flying squirrel sp    | -1.23                 | -1.06                 | -0.20     | 0.64     | 0.80     |          |           |
| fox squirrel          | -0.47                 | -0.39                 | -0.02     | 0.37     | 0.45     |          |           |
| gray fox              | -0.65                 | -0.51                 | 0.13      | 0.76     | 0.90     |          |           |
| gray squirrel sp      | -0.77                 | -0.67                 | -0.22     | 0.19     | 0.28     |          |           |
| mule deer             | -0.77                 | -0.64                 | 0.04      | 0.72     | 0.88     |          |           |
| north american badger | -0.89                 | -0.72                 | 0.04      | 0.82     | 0.99     |          |           |
| north american beaver | -0.49                 | -0.35                 | 0.36      | 1.08     | 1.23     |          |           |
| north american mink   | -0.48                 | -0.35                 | 0.30      | 0.97     | 1.11     |          |           |

**Table S25:** Species and city-specific occupancy parameters. Note that all of these species do not likely reside in this city (that is controlled by another level of the model). (continued)

| City | Parameter         | Species               | CI(0.025) | CI(0.05) | Estimate | CI(0.95) | CI(0.975) |
|------|-------------------|-----------------------|-----------|----------|----------|----------|-----------|
|      | imp               | raccoon               | -0.07     | 0.00     | 0.41     | 0.85     | 0.94      |
|      |                   | red fox               | -0.23     | -0.15    | 0.22     | 0.60     | 0.68      |
|      |                   | red squirrel          | -0.79     | -0.68    | -0.09    | 0.52     | 0.65      |
|      |                   | striped skunk         | -0.95     | -0.81    | -0.22    | 0.34     | 0.45      |
|      |                   | virginia opossum      | -0.27     | -0.20    | 0.17     | 0.54     | 0.62      |
|      |                   | white tailed deer     | -0.15     | -0.08    | 0.31     | 0.71     | 0.80      |
|      |                   | woodchuck             | 0.24      | 0.34     | 0.86     | 1.41     | 1.53      |
|      |                   | armadillo             | -7.17     | -6.47    | -3.10    | 0.37     | 1.19      |
|      |                   | bobcat                | -8.03     | -7.39    | -4.57    | -1.60    | -0.89     |
|      |                   | cottontail sp         | -0.74     | -0.56    | 0.55     | 1.69     | 1.91      |
|      |                   | coyote                | -2.85     | -2.61    | -1.41    | -0.17    | 0.07      |
|      |                   | eastern chipmunk      | -4.33     | -3.94    | -1.83    | 0.12     | 0.48      |
|      |                   | elk                   | -10.82    | -9.94    | -5.83    | -1.67    | -0.54     |
|      |                   | flying squirrel sp    | -3.93     | -3.28    | -0.06    | 3.15     | 3.82      |
|      |                   | fox squirrel          | 0.34      | 0.60     | 1.95     | 3.37     | 3.68      |
|      |                   | gray fox              | -5.52     | -4.75    | -1.38    | 1.91     | 2.64      |
|      |                   | gray squirrel sp      | -0.22     | 0.07     | 1.47     | 2.84     | 3.12      |
|      |                   | mule deer             | -9.29     | -8.42    | -4.84    | -1.05    | -0.03     |
|      |                   | north american badger | -6.65     | -5.92    | -1.91    | 2.90     | 4.14      |
|      |                   | north american beaver | -0.05     | 0.43     | 3.23     | 6.37     | 6.95      |
|      |                   | north american mink   | -1.17     | -0.71    | 1.59     | 3.84     | 4.26      |
|      |                   | raccoon               | -1.31     | -1.04    | 0.49     | 2.06     | 2.34      |
|      |                   | red fox               | -1.35     | -1.10    | 0.31     | 1.66     | 1.92      |
|      |                   | red squirrel          | -3.18     | -2.86    | -1.10    | 0.63     | 0.99      |
|      |                   | striped skunk         | -5.10     | -4.38    | -1.51    | 0.79     | 1.21      |
|      |                   | virginia opossum      | -0.32     | -0.07    | 1.08     | 2.30     | 2.54      |
|      | white tailed deer | -7.67                 | -7.35     | -5.78    | -4.29    | -4.00    |           |
|      | woodchuck         | 0.51                  | 0.90      | 2.76     | 4.81     | 5.21     |           |
|      | gent X imp        | armadillo             | -6.36     | -5.45    | -2.01    | 1.30     | 2.27      |
|      |                   | bobcat                | -4.11     | -3.36    | -0.49    | 2.46     | 3.14      |
|      |                   | cottontail sp         | -2.95     | -2.65    | -1.11    | 0.43     | 0.76      |
|      |                   | coyote                | -3.23     | -2.87    | -1.23    | 0.45     | 0.82      |
|      |                   | eastern chipmunk      | -5.45     | -4.89    | -2.14    | 0.10     | 0.51      |
|      |                   | elk                   | -4.85     | -4.10    | -1.05    | 1.98     | 2.80      |
|      |                   | flying squirrel sp    | -4.81     | -4.13    | -1.26    | 1.66     | 2.34      |
|      |                   | fox squirrel          | -3.43     | -3.03    | -1.09    | 0.71     | 1.06      |
|      |                   | gray fox              | -3.68     | -2.90    | 0.07     | 2.89     | 3.58      |
|      |                   | gray squirrel sp      | -5.50     | -4.92    | -2.68    | -0.72    | -0.36     |
|      |                   | mule deer             | -4.96     | -4.30    | -1.31    | 1.74     | 2.46      |
|      |                   | north american badger | -5.10     | -4.40    | -1.45    | 1.50     | 2.22      |
|      |                   | north american beaver | -3.54     | -3.04    | -0.57    | 2.34     | 3.06      |
|      |                   | north american mink   | -3.95     | -3.48    | -1.12    | 1.23     | 1.77      |
|      |                   | raccoon               | -3.88     | -3.42    | -1.05    | 1.35     | 1.88      |
|      |                   | red fox               | -3.27     | -2.97    | -1.13    | 0.74     | 1.15      |
|      |                   | red squirrel          | -6.46     | -5.63    | -2.49    | 0.09     | 0.64      |
|      |                   | striped skunk         | -5.09     | -4.34    | -1.38    | 1.67     | 2.41      |
|      |                   | virginia opossum      | -2.20     | -1.87    | -0.18    | 1.54     | 1.89      |
|      |                   | white tailed deer     | -2.41     | -2.08    | -0.16    | 2.01     | 2.46      |
|      | woodchuck         | -1.39                 | -0.99     | 1.50     | 4.83     | 5.59     |           |

**Table S25:** Species and city-specific occupancy parameters. Note that all of these species do not likely reside in this city (that is controlled by another level of the model). (continued)

| City          | Parameter             | Species               | CI(0.025) | CI(0.05) | Estimate | CI(0.95) | CI(0.975) |      |
|---------------|-----------------------|-----------------------|-----------|----------|----------|----------|-----------|------|
| Iowa City, IA | intercept             | armadillo             | -3.99     | -3.51    | -1.46    | 0.57     | 1.02      |      |
|               |                       | bobcat                | -3.84     | -3.67    | -2.83    | -1.87    | -1.62     |      |
|               |                       | cottontail sp         | -0.55     | -0.50    | -0.26    | -0.03    | 0.02      |      |
|               |                       | coyote                | -0.46     | -0.41    | -0.12    | 0.18     | 0.23      |      |
|               |                       | eastern chipmunk      | -2.58     | -2.52    | -2.19    | -1.88    | -1.82     |      |
|               |                       | elk                   | -6.51     | -6.03    | -3.78    | -1.56    | -1.04     |      |
|               |                       | flying squirrel sp    | -6.49     | -6.14    | -4.70    | -3.40    | -3.13     |      |
|               |                       | fox squirrel          | -1.00     | -0.95    | -0.70    | -0.46    | -0.41     |      |
|               |                       | gray fox              | -5.96     | -5.67    | -4.36    | -2.98    | -2.63     |      |
|               |                       | gray squirrel sp      | 0.57      | 0.62     | 0.92     | 1.22     | 1.28      |      |
|               |                       | mule deer             | -5.92     | -5.14    | -2.00    | 1.05     | 1.71      |      |
|               |                       | north american badger | -5.39     | -5.16    | -4.11    | -3.01    | -2.80     |      |
|               |                       | north american beaver | -6.55     | -6.23    | -4.80    | -3.51    | -3.26     |      |
|               |                       | north american mink   | -2.11     | -2.03    | -1.61    | -1.16    | -1.07     |      |
|               |                       | raccoon               | 0.96      | 1.02     | 1.35     | 1.69     | 1.76      |      |
|               |                       | red fox               | -0.87     | -0.83    | -0.59    | -0.36    | -0.31     |      |
|               |                       | red squirrel          | -8.49     | -7.62    | -3.77    | -1.09    | -0.54     |      |
|               |                       | striped skunk         | -2.87     | -2.78    | -2.30    | -1.80    | -1.70     |      |
|               |                       | virginia opossum      | 0.00      | 0.04     | 0.28     | 0.53     | 0.58      |      |
|               |                       | white tailed deer     | 1.12      | 1.19     | 1.56     | 1.97     | 2.06      |      |
|               |                       | woodchuck             | -2.29     | -2.22    | -1.89    | -1.57    | -1.50     |      |
|               |                       | gent                  | armadillo | -1.03    | -0.89    | -0.19    | 0.47      | 0.60 |
|               |                       |                       | bobcat    | -0.79    | -0.65    | 0.00     | 0.62      | 0.74 |
|               | cottontail sp         |                       | -0.16     | -0.07    | 0.34     | 0.79     | 0.89      |      |
|               | coyote                |                       | -0.27     | -0.18    | 0.26     | 0.80     | 0.92      |      |
|               | eastern chipmunk      |                       | -0.55     | -0.44    | 0.11     | 0.66     | 0.77      |      |
|               | elk                   |                       | -1.39     | -1.18    | -0.19    | 0.70     | 0.87      |      |
|               | flying squirrel sp    |                       | -1.22     | -1.05    | -0.18    | 0.64     | 0.80      |      |
|               | fox squirrel          |                       | -0.78     | -0.67    | -0.16    | 0.32     | 0.42      |      |
|               | gray fox              |                       | -0.55     | -0.42    | 0.22     | 0.87     | 1.00      |      |
|               | gray squirrel sp      |                       | -0.62     | -0.54    | -0.08    | 0.39     | 0.48      |      |
|               | mule deer             |                       | -0.81     | -0.66    | 0.03     | 0.70     | 0.84      |      |
|               | north american badger |                       | -0.91     | -0.74    | 0.05     | 0.82     | 0.98      |      |
|               | north american beaver |                       | -0.61     | -0.46    | 0.30     | 1.05     | 1.19      |      |
|               | north american mink   |                       | -0.83     | -0.69    | 0.02     | 0.69     | 0.82      |      |
|               | raccoon               |                       | 0.02      | 0.11     | 0.56     | 1.13     | 1.27      |      |
|               | red fox               |                       | -0.17     | -0.09    | 0.35     | 0.86     | 0.97      |      |
|               | red squirrel          |                       | -0.95     | -0.80    | -0.04    | 0.71     | 0.87      |      |
|               | striped skunk         |                       | -0.77     | -0.66    | -0.11    | 0.45     | 0.57      |      |
|               | virginia opossum      |                       | -0.29     | -0.20    | 0.26     | 0.76     | 0.86      |      |
|               | white tailed deer     |                       | -0.21     | -0.11    | 0.39     | 0.98     | 1.11      |      |
|               | woodchuck             |                       | -0.05     | 0.07     | 0.66     | 1.26     | 1.38      |      |
| imp           | armadillo             |                       | -7.26     | -6.41    | -3.08    | 0.39     | 1.19      |      |
|               | bobcat                |                       | -7.79     | -7.19    | -4.62    | -2.02    | -1.49     |      |
|               | cottontail sp         | 0.96                  | 1.17      | 2.45     | 3.80     | 4.07     |           |      |
|               | coyote                | -3.82                 | -3.56     | -2.11    | -0.70    | -0.41    |           |      |
|               | eastern chipmunk      | -1.28                 | -0.98     | 0.73     | 2.51     | 2.86     |           |      |
|               | elk                   | -10.77                | -9.91     | -5.86    | -1.65    | -0.64    |           |      |
|               | flying squirrel sp    | -4.52                 | -3.76     | -0.40    | 2.79     | 3.41     |           |      |

**Table S25:** Species and city-specific occupancy parameters. Note that all of these species do not likely reside in this city (that is controlled by another level of the model). (continued)

| City                  | Parameter             | Species               | CI(0.025) | CI(0.05) | Estimate | CI(0.95) | CI(0.975) |
|-----------------------|-----------------------|-----------------------|-----------|----------|----------|----------|-----------|
| Jackson, MS           | gent X imp            | fox squirrel          | -3.45     | -3.20    | -1.86    | -0.54    | -0.31     |
|                       |                       | gray fox              | -4.34     | -3.72    | -0.76    | 2.51     | 3.26      |
|                       |                       | gray squirrel sp      | 0.35      | 0.60     | 1.98     | 3.33     | 3.64      |
|                       |                       | mule deer             | -9.15     | -8.35    | -4.83    | -1.01    | -0.01     |
|                       |                       | north american badger | -8.35     | -7.43    | -3.34    | 0.55     | 1.27      |
|                       |                       | north american beaver | -2.85     | -2.07    | 1.54     | 4.72     | 5.43      |
|                       |                       | north american mink   | 0.09      | 0.47     | 2.43     | 4.59     | 5.07      |
|                       |                       | raccoon               | -1.17     | -0.90    | 0.55     | 2.12     | 2.46      |
|                       |                       | red fox               | 1.19      | 1.45     | 2.79     | 4.17     | 4.47      |
|                       |                       | red squirrel          | -6.29     | -5.30    | -1.37    | 2.46     | 3.31      |
|                       |                       | striped skunk         | -5.21     | -4.62    | -1.96    | 0.24     | 0.68      |
|                       |                       | virginia opossum      | -1.14     | -0.92    | 0.26     | 1.45     | 1.70      |
|                       |                       | white tailed deer     | -4.29     | -3.96    | -2.12    | -0.20    | 0.20      |
|                       |                       | woodchuck             | -0.47     | -0.16    | 1.48     | 3.07     | 3.39      |
|                       |                       | armadillo             | -6.46     | -5.49    | -2.02    | 1.41     | 2.44      |
|                       |                       | bobcat                | -3.96     | -3.25    | -0.40    | 2.50     | 3.22      |
|                       |                       | cottontail sp         | -2.69     | -2.33    | -0.47    | 1.78     | 2.30      |
|                       |                       | coyote                | -5.63     | -4.99    | -2.40    | -0.40    | 0.04      |
|                       |                       | eastern chipmunk      | -5.09     | -4.48    | -1.72    | 0.70     | 1.27      |
|                       |                       | elk                   | -4.78     | -4.11    | -1.04    | 2.06     | 2.87      |
|                       | flying squirrel sp    | -4.74                 | -4.13     | -1.21    | 1.72     | 2.50     |           |
|                       | fox squirrel          | -3.83                 | -3.31     | -0.85    | 1.45     | 1.97     |           |
|                       | gray fox              | -2.53                 | -1.96     | 0.78     | 3.96     | 4.75     |           |
|                       | gray squirrel sp      | -3.97                 | -3.56     | -1.52    | 0.73     | 1.27     |           |
|                       | mule deer             | -5.17                 | -4.35     | -1.31    | 1.71     | 2.48     |           |
|                       | north american badger | -5.08                 | -4.38     | -1.39    | 1.66     | 2.36     |           |
|                       | north american beaver | -4.83                 | -4.07     | -1.15    | 1.77     | 2.46     |           |
|                       | north american mink   | -4.97                 | -4.24     | -1.36    | 1.42     | 2.09     |           |
|                       | raccoon               | -4.12                 | -3.53     | -0.83    | 2.43     | 3.16     |           |
|                       | red fox               | -3.85                 | -3.43     | -1.28    | 1.10     | 1.69     |           |
|                       | red squirrel          | -5.61                 | -4.75     | -1.60    | 1.48     | 2.23     |           |
|                       | striped skunk         | -5.65                 | -4.70     | -1.56    | 1.29     | 1.95     |           |
|                       | virginia opossum      | -2.57                 | -2.18     | -0.16    | 2.14     | 2.69     |           |
|                       | white tailed deer     | -3.18                 | -2.73     | -0.48    | 2.14     | 2.82     |           |
|                       | woodchuck             | -2.99                 | -2.48     | -0.13    | 2.71     | 3.44     |           |
|                       | armadillo             | -1.92                 | -1.84     | -1.46    | -1.10    | -1.03    |           |
|                       | bobcat                | -3.57                 | -3.42     | -2.67    | -1.93    | -1.79    |           |
|                       | cottontail sp         | -2.48                 | -2.39     | -1.96    | -1.54    | -1.47    |           |
|                       | coyote                | -2.36                 | -2.27     | -1.83    | -1.41    | -1.32    |           |
|                       | eastern chipmunk      | -5.57                 | -5.10     | -2.79    | -1.00    | -0.58    |           |
| elk                   | -6.59                 | -6.05                 | -3.83     | -1.58    | -1.02    |          |           |
| flying squirrel sp    | -7.38                 | -6.94                 | -5.06     | -3.42    | -3.09    |          |           |
| fox squirrel          | -4.15                 | -4.00                 | -3.23     | -2.59    | -2.47    |          |           |
| gray fox              | -2.87                 | -2.78                 | -2.30     | -1.86    | -1.78    |          |           |
| gray squirrel sp      | 0.03                  | 0.09                  | 0.41      | 0.75     | 0.81     |          |           |
| mule deer             | -5.92                 | -5.11                 | -2.02     | 1.10     | 1.79     |          |           |
| north american badger | -7.92                 | -7.35                 | -4.92     | -2.72    | -2.24    |          |           |
| north american beaver | -7.50                 | -6.99                 | -5.10     | -3.32    | -2.89    |          |           |
| north american mink   | -6.69                 | -6.12                 | -3.73     | -1.31    | -0.89    |          |           |
| Jackson, MS           | intercept             | fox squirrel          | -3.45     | -3.20    | -1.86    | -0.54    | -0.31     |
|                       |                       | gray fox              | -4.34     | -3.72    | -0.76    | 2.51     | 3.26      |
|                       |                       | gray squirrel sp      | 0.35      | 0.60     | 1.98     | 3.33     | 3.64      |
|                       |                       | mule deer             | -9.15     | -8.35    | -4.83    | -1.01    | -0.01     |
|                       |                       | north american badger | -8.35     | -7.43    | -3.34    | 0.55     | 1.27      |
|                       |                       | north american beaver | -2.85     | -2.07    | 1.54     | 4.72     | 5.43      |
|                       |                       | north american mink   | 0.09      | 0.47     | 2.43     | 4.59     | 5.07      |
|                       |                       | raccoon               | -1.17     | -0.90    | 0.55     | 2.12     | 2.46      |
|                       |                       | red fox               | 1.19      | 1.45     | 2.79     | 4.17     | 4.47      |
|                       |                       | red squirrel          | -6.29     | -5.30    | -1.37    | 2.46     | 3.31      |
|                       |                       | striped skunk         | -5.21     | -4.62    | -1.96    | 0.24     | 0.68      |
|                       |                       | virginia opossum      | -1.14     | -0.92    | 0.26     | 1.45     | 1.70      |

**Table S25:** Species and city-specific occupancy parameters. Note that all of these species do not likely reside in this city (that is controlled by another level of the model). (*continued*)

| City | Parameter             | Species               | CI(0.025)     | CI(0.05) | Estimate | CI(0.95) | CI(0.975) |      |
|------|-----------------------|-----------------------|---------------|----------|----------|----------|-----------|------|
|      | gent                  | raccoon               | -0.43         | -0.36    | -0.06    | 0.25     | 0.30      |      |
|      |                       | red fox               | -1.37         | -1.31    | -0.99    | -0.67    | -0.61     |      |
|      |                       | red squirrel          | -7.41         | -6.53    | -3.38    | -0.86    | -0.20     |      |
|      |                       | striped skunk         | -4.64         | -4.46    | -3.61    | -2.87    | -2.74     |      |
|      |                       | virginia opossum      | -0.59         | -0.54    | -0.23    | 0.08     | 0.15      |      |
|      |                       | white tailed deer     | -0.47         | -0.41    | -0.10    | 0.23     | 0.29      |      |
|      |                       | woodchuck             | -4.95         | -4.49    | -2.53    | -0.78    | -0.45     |      |
|      |                       | armadillo             | -0.93         | -0.81    | -0.23    | 0.35     | 0.45      |      |
|      |                       | bobcat                | -0.78         | -0.63    | 0.00     | 0.61     | 0.75      |      |
|      |                       | cottontail sp         | -0.14         | -0.05    | 0.38     | 0.86     | 0.96      |      |
|      |                       | coyote                | -0.54         | -0.43    | 0.06     | 0.54     | 0.63      |      |
|      |                       | eastern chipmunk      | -0.73         | -0.59    | 0.07     | 0.68     | 0.81      |      |
|      |                       | elk                   | -1.41         | -1.17    | -0.19    | 0.71     | 0.89      |      |
|      |                       | flying squirrel sp    | -1.22         | -1.04    | -0.19    | 0.64     | 0.81      |      |
|      |                       | fox squirrel          | -0.69         | -0.57    | -0.04    | 0.52     | 0.64      |      |
|      |                       | gray fox              | -0.44         | -0.33    | 0.27     | 0.90     | 1.04      |      |
|      |                       | gray squirrel sp      | -0.53         | -0.44    | -0.03    | 0.42     | 0.51      |      |
|      |                       | mule deer             | -0.78         | -0.62    | 0.04     | 0.71     | 0.86      |      |
|      |                       | north american badger | -0.86         | -0.71    | 0.06     | 0.85     | 1.01      |      |
|      |                       | north american beaver | -0.61         | -0.46    | 0.30     | 1.07     | 1.22      |      |
|      |                       | north american mink   | -0.76         | -0.61    | 0.12     | 0.83     | 0.98      |      |
|      |                       | imp                   | raccoon       | -0.25    | -0.16    | 0.27     | 0.68      | 0.76 |
|      |                       |                       | red fox       | -0.34    | -0.25    | 0.20     | 0.67      | 0.78 |
|      |                       |                       | red squirrel  | -0.96    | -0.80    | -0.04    | 0.70      | 0.85 |
|      |                       |                       | striped skunk | -0.96    | -0.83    | -0.22    | 0.32      | 0.44 |
|      | virginia opossum      |                       | -0.86         | -0.76    | -0.25    | 0.18     | 0.25      |      |
|      | white tailed deer     |                       | -0.57         | -0.45    | 0.04     | 0.47     | 0.55      |      |
|      | woodchuck             |                       | -0.12         | 0.02     | 0.67     | 1.30     | 1.43      |      |
|      | armadillo             |                       | -3.49         | -3.13    | -1.17    | 0.93     | 1.29      |      |
|      | bobcat                |                       | -8.06         | -7.46    | -4.87    | -2.42    | -1.89     |      |
|      | cottontail sp         |                       | -4.04         | -3.59    | -1.37    | 0.69     | 1.07      |      |
|      | coyote                |                       | -5.68         | -5.26    | -3.17    | -1.31    | -0.88     |      |
|      | eastern chipmunk      |                       | -5.12         | -4.34    | -1.11    | 1.95     | 2.67      |      |
|      | elk                   |                       | -10.80        | -9.90    | -5.86    | -1.64    | -0.62     |      |
|      | flying squirrel sp    |                       | -4.14         | -3.41    | -0.13    | 3.16     | 3.83      |      |
|      | fox squirrel          |                       | -2.72         | -2.17    | 0.49     | 3.39     | 3.98      |      |
|      | gray fox              |                       | -4.20         | -3.77    | -1.58    | 0.54     | 0.97      |      |
|      | gray squirrel sp      |                       | 1.23          | 1.53     | 3.02     | 4.62     | 4.95      |      |
|      | mule deer             |                       | -9.24         | -8.40    | -4.87    | -1.08    | -0.11     |      |
|      | north american badger |                       | -8.35         | -7.35    | -2.94    | 1.64     | 2.90      |      |
|      | north american beaver |                       | -2.58         | -1.72    | 1.87     | 5.24     | 5.86      |      |
|      | north american mink   |                       | -3.10         | -2.36    | 1.01     | 4.04     | 4.77      |      |
|      | raccoon               |                       | -0.71         | -0.42    | 1.21     | 2.88     | 3.21      |      |
|      | red fox               |                       | -4.10         | -3.77    | -1.94    | -0.19    | 0.14      |      |
|      | red squirrel          |                       | -6.37         | -5.31    | -1.40    | 2.53     | 3.47      |      |
|      | striped skunk         |                       | -3.46         | -2.91    | -0.44    | 1.92     | 2.43      |      |
|      | virginia opossum      | -0.07                 | 0.19          | 1.62     | 3.18     | 3.49     |           |      |
|      | white tailed deer     | -6.46                 | -6.12         | -4.38    | -2.66    | -2.32    |           |      |
|      | woodchuck             | -2.27                 | -1.51         | 1.53     | 4.55     | 5.23     |           |      |

**Table S25:** Species and city-specific occupancy parameters. Note that all of these species do not likely reside in this city (that is controlled by another level of the model). (continued)

| City            | Parameter             | Species               | CI(0.025) | CI(0.05) | Estimate | CI(0.95) | CI(0.975) |       |
|-----------------|-----------------------|-----------------------|-----------|----------|----------|----------|-----------|-------|
| Little Rock, AR | gent X imp            | armadillo             | -10.58    | -8.58    | -3.48    | -0.84    | -0.35     |       |
|                 |                       | bobcat                | -4.47     | -3.76    | -0.71    | 1.95     | 2.60      |       |
|                 |                       | cottontail sp         | -4.42     | -3.91    | -1.59    | 0.41     | 0.81      |       |
|                 |                       | coyote                | -5.76     | -5.00    | -2.36    | -0.28    | 0.14      |       |
|                 |                       | eastern chipmunk      | -4.77     | -4.11    | -1.42    | 1.30     | 1.93      |       |
|                 |                       | elk                   | -4.74     | -4.04    | -1.06    | 2.04     | 2.74      |       |
|                 |                       | flying squirrel sp    | -4.93     | -4.30    | -1.26    | 1.66     | 2.30      |       |
|                 |                       | fox squirrel          | -3.50     | -2.93    | -0.41    | 2.26     | 2.85      |       |
|                 |                       | gray fox              | -3.01     | -2.37    | 0.28     | 3.05     | 3.70      |       |
|                 |                       | gray squirrel sp      | -5.55     | -5.06    | -2.79    | -0.87    | -0.47     |       |
|                 |                       | mule deer             | -5.02     | -4.36    | -1.32    | 1.70     | 2.55      |       |
|                 |                       | north american badger | -5.08     | -4.44    | -1.45    | 1.54     | 2.37      |       |
|                 |                       | north american beaver | -4.85     | -4.17    | -1.21    | 1.74     | 2.38      |       |
|                 |                       | north american mink   | -4.88     | -4.16    | -1.27    | 1.58     | 2.28      |       |
|                 |                       | raccoon               | -9.56     | -8.84    | -5.19    | -2.36    | -1.92     |       |
|                 |                       | red fox               | -7.13     | -6.30    | -2.96    | -0.73    | -0.33     |       |
|                 |                       | red squirrel          | -5.40     | -4.68    | -1.54    | 1.44     | 2.16      |       |
|                 |                       | striped skunk         | -5.23     | -4.45    | -1.41    | 1.39     | 2.11      |       |
|                 |                       | virginia opossum      | -5.32     | -4.76    | -2.27    | -0.34    | 0.01      |       |
|                 |                       | white tailed deer     | -5.72     | -4.98    | -2.17    | -0.08    | 0.28      |       |
|                 |                       | woodchuck             | -5.10     | -4.22    | -0.87    | 2.41     | 3.27      |       |
|                 |                       | intercept             | armadillo | -0.91    | -0.84    | -0.48    | -0.12     | -0.05 |
|                 |                       |                       | bobcat    | -3.15    | -3.03    | -2.45    | -1.84     | -1.73 |
|                 | cottontail sp         |                       | -1.00     | -0.93    | -0.58    | -0.23    | -0.16     |       |
|                 | coyote                |                       | -0.93     | -0.83    | -0.34    | 0.25     | 0.42      |       |
|                 | eastern chipmunk      |                       | -3.40     | -3.28    | -2.74    | -2.24    | -2.16     |       |
|                 | elk                   |                       | -6.53     | -6.04    | -3.79    | -1.56    | -1.05     |       |
|                 | flying squirrel sp    |                       | -3.40     | -3.26    | -2.59    | -1.93    | -1.80     |       |
|                 | fox squirrel          |                       | -0.86     | -0.80    | -0.44    | -0.09    | -0.03     |       |
|                 | gray fox              |                       | -1.68     | -1.61    | -1.23    | -0.86    | -0.78     |       |
|                 | gray squirrel sp      |                       | 0.84      | 0.93     | 1.46     | 2.02     | 2.13      |       |
|                 | mule deer             |                       | -5.82     | -5.13    | -2.03    | 0.99     | 1.63      |       |
|                 | north american badger |                       | -8.14     | -7.58    | -5.20    | -2.97    | -2.46     |       |
|                 | north american beaver |                       | -6.28     | -5.95    | -4.47    | -3.12    | -2.85     |       |
|                 | north american mink   |                       | -4.15     | -3.95    | -2.91    | -1.81    | -1.57     |       |
|                 | raccoon               |                       | 0.17      | 0.25     | 0.68     | 1.13     | 1.22      |       |
|                 | red fox               |                       | -2.61     | -2.51    | -2.04    | -1.60    | -1.51     |       |
|                 | red squirrel          |                       | -7.26     | -6.50    | -3.38    | -0.82    | -0.22     |       |
|                 | striped skunk         |                       | -2.43     | -2.34    | -1.91    | -1.50    | -1.42     |       |
|                 | virginia opossum      |                       | 0.71      | 0.80     | 1.32     | 1.88     | 1.98      |       |
|                 | white tailed deer     |                       | -0.96     | -0.87    | -0.48    | -0.08    | -0.01     |       |
|                 | woodchuck             |                       | -3.14     | -3.04    | -2.51    | -2.02    | -1.94     |       |
| gent            | armadillo             |                       | -0.94     | -0.80    | -0.19    | 0.43     | 0.54      |       |
|                 | bobcat                |                       | -0.55     | -0.44    | 0.18     | 0.86     | 1.04      |       |
|                 | cottontail sp         | -0.28                 | -0.18     | 0.29     | 0.75     | 0.86     |           |       |
|                 | coyote                | -0.57                 | -0.45     | 0.09     | 0.63     | 0.74     |           |       |
|                 | eastern chipmunk      | -0.76                 | -0.61     | 0.03     | 0.63     | 0.76     |           |       |
|                 | elk                   | -1.37                 | -1.17     | -0.19    | 0.68     | 0.86     |           |       |
|                 | flying squirrel sp    | -1.28                 | -1.08     | -0.22    | 0.61     | 0.76     |           |       |

**Table S25:** Species and city-specific occupancy parameters. Note that all of these species do not likely reside in this city (that is controlled by another level of the model). (continued)

| City | Parameter  | Species               | CI(0.025) | CI(0.05) | Estimate | CI(0.95) | CI(0.975) |
|------|------------|-----------------------|-----------|----------|----------|----------|-----------|
|      |            | fox squirrel          | -0.61     | -0.51    | 0.00     | 0.58     | 0.69      |
|      |            | gray fox              | -0.45     | -0.33    | 0.25     | 0.87     | 1.00      |
|      |            | gray squirrel sp      | -0.61     | -0.50    | 0.00     | 0.56     | 0.70      |
|      |            | mule deer             | -0.81     | -0.65    | 0.04     | 0.72     | 0.87      |
|      |            | north american badger | -0.90     | -0.74    | 0.06     | 0.87     | 1.03      |
|      |            | north american beaver | -0.61     | -0.46    | 0.29     | 1.07     | 1.21      |
|      |            | north american mink   | -0.59     | -0.46    | 0.24     | 0.96     | 1.10      |
|      |            | raccoon               | -0.02     | 0.08     | 0.54     | 1.12     | 1.26      |
|      |            | red fox               | -0.40     | -0.29    | 0.23     | 0.80     | 0.93      |
|      |            | red squirrel          | -0.96     | -0.80    | -0.05    | 0.70     | 0.86      |
|      |            | striped skunk         | -0.68     | -0.58    | -0.05    | 0.55     | 0.69      |
|      |            | virginia opossum      | -0.51     | -0.41    | 0.14     | 0.67     | 0.79      |
|      |            | white tailed deer     | -0.49     | -0.37    | 0.20     | 0.74     | 0.86      |
|      | imp        | woodchuck             | 0.06      | 0.18     | 0.76     | 1.38     | 1.52      |
|      |            | armadillo             | -4.71     | -4.39    | -2.71    | -1.09    | -0.75     |
|      |            | bobcat                | -7.37     | -6.88    | -4.48    | -2.04    | -1.51     |
|      |            | cottontail sp         | -0.82     | -0.54    | 0.91     | 2.36     | 2.63      |
|      |            | coyote                | -3.61     | -3.25    | -1.31    | 0.81     | 1.30      |
|      |            | eastern chipmunk      | -4.58     | -4.11    | -1.63    | 0.56     | 0.97      |
|      |            | elk                   | -10.88    | -10.02   | -5.89    | -1.65    | -0.72     |
|      |            | flying squirrel sp    | -1.38     | -0.88    | 1.58     | 4.35     | 4.90      |
|      |            | fox squirrel          | -5.14     | -4.76    | -2.88    | -1.20    | -0.89     |
|      |            | gray fox              | -1.35     | -1.02    | 0.71     | 2.54     | 2.90      |
|      |            | gray squirrel sp      | -0.57     | -0.22    | 1.53     | 3.23     | 3.54      |
|      |            | mule deer             | -9.17     | -8.38    | -4.80    | -1.01    | 0.03      |
|      |            | north american badger | -8.31     | -7.24    | -2.96    | 1.64     | 2.72      |
|      |            | north american beaver | -2.88     | -1.95    | 1.63     | 4.84     | 5.40      |
|      |            | north american mink   | -1.64     | -1.08    | 1.53     | 4.28     | 4.89      |
|      |            | raccoon               | -4.44     | -4.09    | -2.16    | -0.36    | -0.04     |
|      |            | red fox               | -2.76     | -2.35    | -0.07    | 2.03     | 2.46      |
|      |            | red squirrel          | -6.16     | -5.25    | -1.35    | 2.53     | 3.54      |
|      |            | striped skunk         | -1.75     | -1.41    | 0.32     | 2.12     | 2.49      |
|      |            | virginia opossum      | -2.63     | -2.30    | -0.59    | 1.11     | 1.41      |
|      |            | white tailed deer     | -7.68     | -7.27    | -5.22    | -3.20    | -2.86     |
|      |            | woodchuck             | -0.20     | 0.18     | 2.24     | 4.42     | 4.90      |
|      | gent X imp | armadillo             | -6.74     | -5.75    | -2.62    | -0.09    | 0.43      |
|      |            | bobcat                | -2.91     | -2.32    | 0.27     | 3.54     | 4.61      |
|      |            | cottontail sp         | -3.27     | -2.90    | -1.11    | 0.64     | 0.99      |
|      |            | coyote                | -4.63     | -4.03    | -1.77    | 0.51     | 1.03      |
|      |            | eastern chipmunk      | -5.10     | -4.38    | -1.68    | 0.87     | 1.41      |
|      |            | elk                   | -4.86     | -4.00    | -1.06    | 2.06     | 2.86      |
|      |            | flying squirrel sp    | -5.33     | -4.56    | -1.52    | 1.23     | 1.84      |
|      |            | fox squirrel          | -2.68     | -2.22    | -0.04    | 2.61     | 3.20      |
|      |            | gray fox              | -2.65     | -2.15    | 0.24     | 2.81     | 3.40      |
|      |            | gray squirrel sp      | -3.58     | -3.19    | -1.23    | 1.13     | 1.61      |
|      |            | mule deer             | -5.07     | -4.31    | -1.34    | 1.80     | 2.61      |
|      |            | north american badger | -5.13     | -4.47    | -1.44    | 1.64     | 2.38      |
|      |            | north american beaver | -5.01     | -4.27    | -1.31    | 1.55     | 2.22      |
|      |            | north american mink   | -3.66     | -3.16    | -0.68    | 2.17     | 2.98      |



**Table S25:** Species and city-specific occupancy parameters. Note that all of these species do not likely reside in this city (that is controlled by another level of the model). (continued)

| City                  | Parameter             | Species               | CI(0.025) | CI(0.05) | Estimate | CI(0.95) | CI(0.975) |
|-----------------------|-----------------------|-----------------------|-----------|----------|----------|----------|-----------|
| Madison, WI           | intercept             | raccoon               | -2.05     | -1.68    | 0.71     | 3.66     | 4.32      |
|                       |                       | red fox               | -4.79     | -4.20    | -1.71    | 0.78     | 1.40      |
|                       |                       | red squirrel          | -5.56     | -4.73    | -1.60    | 1.43     | 2.15      |
|                       |                       | striped skunk         | -4.95     | -4.25    | -1.50    | 1.27     | 2.02      |
|                       |                       | virginia opossum      | -3.55     | -3.06    | -1.01    | 0.95     | 1.36      |
|                       |                       | white tailed deer     | -4.58     | -3.89    | -1.18    | 1.36     | 1.98      |
|                       |                       | woodchuck             | -4.18     | -3.55    | -0.74    | 2.61     | 3.53      |
|                       |                       | armadillo             | -3.98     | -3.53    | -1.46    | 0.59     | 1.05      |
|                       |                       | bobcat                | -5.14     | -4.69    | -2.65    | -0.74    | -0.35     |
|                       |                       | cottontail sp         | -0.97     | -0.88    | -0.37    | 0.13     | 0.22      |
|                       |                       | coyote                | -2.01     | -1.90    | -1.25    | -0.59    | -0.45     |
|                       |                       | eastern chipmunk      | -4.11     | -3.91    | -2.93    | -2.12    | -1.97     |
|                       |                       | elk                   | -6.52     | -6.03    | -3.80    | -1.58    | -1.00     |
|                       |                       | flying squirrel sp    | -7.12     | -6.62    | -4.68    | -3.08    | -2.76     |
|                       |                       | fox squirrel          | -7.13     | -6.33    | -2.47    | 1.22     | 1.91      |
|                       |                       | gray fox              | -5.93     | -5.59    | -3.98    | -2.78    | -2.58     |
|                       |                       | gray squirrel sp      | -0.01     | 0.08     | 0.60     | 1.14     | 1.24      |
|                       |                       | mule deer             | -5.90     | -5.17    | -2.00    | 1.09     | 1.74      |
|                       |                       | north american badger | -8.02     | -7.44    | -5.19    | -3.34    | -2.94     |
|                       |                       | north american beaver | -5.93     | -5.58    | -3.96    | -2.46    | -2.17     |
|                       | north american mink   | -5.22                 | -4.85     | -3.33    | -2.06    | -1.81    |           |
|                       | raccoon               | -1.15                 | -1.05     | -0.55    | -0.06    | 0.05     |           |
|                       | red fox               | -7.22                 | -6.62     | -4.23    | -2.63    | -2.29    |           |
|                       | red squirrel          | -7.95                 | -7.22     | -4.34    | -1.95    | -1.37    |           |
|                       | striped skunk         | -3.28                 | -3.12     | -2.33    | -1.64    | -1.51    |           |
|                       | virginia opossum      | -1.41                 | -1.29     | -0.77    | -0.25    | -0.16    |           |
|                       | white tailed deer     | -2.70                 | -2.57     | -1.81    | -1.15    | -1.01    |           |
|                       | woodchuck             | -4.70                 | -4.41     | -3.10    | -1.93    | -1.70    |           |
|                       | gent                  | armadillo             | -1.03     | -0.87    | -0.19    | 0.48     | 0.63      |
|                       | bobcat                | -0.76                 | -0.61     | 0.03     | 0.67     | 0.79     |           |
|                       | cottontail sp         | -0.19                 | -0.10     | 0.35     | 0.84     | 0.95     |           |
|                       | coyote                | -0.72                 | -0.59     | -0.01    | 0.51     | 0.61     |           |
|                       | eastern chipmunk      | -0.75                 | -0.60     | 0.03     | 0.62     | 0.75     |           |
|                       | elk                   | -1.39                 | -1.19     | -0.19    | 0.70     | 0.88     |           |
|                       | flying squirrel sp    | -1.23                 | -1.04     | -0.19    | 0.66     | 0.83     |           |
|                       | fox squirrel          | -0.71                 | -0.58     | -0.03    | 0.57     | 0.71     |           |
|                       | gray fox              | -0.66                 | -0.52     | 0.14     | 0.78     | 0.92     |           |
|                       | gray squirrel sp      | -0.71                 | -0.60     | -0.10    | 0.40     | 0.50     |           |
|                       | mule deer             | -0.80                 | -0.65     | 0.03     | 0.71     | 0.85     |           |
|                       | north american badger | -0.89                 | -0.73     | 0.06     | 0.85     | 1.02     |           |
| north american beaver | -0.64                 | -0.47                 | 0.31      | 1.06     | 1.20     |          |           |
| north american mink   | -0.79                 | -0.64                 | 0.11      | 0.83     | 0.98     |          |           |
| raccoon               | -0.08                 | 0.01                  | 0.47      | 0.98     | 1.08     |          |           |
| red fox               | -0.52                 | -0.39                 | 0.16      | 0.71     | 0.83     |          |           |
| red squirrel          | -0.99                 | -0.83                 | -0.06     | 0.69     | 0.85     |          |           |
| striped skunk         | -0.95                 | -0.81                 | -0.22     | 0.33     | 0.46     |          |           |
| virginia opossum      | -0.48                 | -0.36                 | 0.17      | 0.72     | 0.84     |          |           |
| white tailed deer     | -0.63                 | -0.48                 | 0.11      | 0.63     | 0.73     |          |           |
| woodchuck             | -0.15                 | 0.00                  | 0.64      | 1.27     | 1.40     |          |           |

**Table S25:** Species and city-specific occupancy parameters. Note that all of these species do not likely reside in this city (that is controlled by another level of the model). (continued)

| City               | Parameter             | Species               | CI(0.025)     | CI(0.05) | Estimate | CI(0.95) | CI(0.975) |       |
|--------------------|-----------------------|-----------------------|---------------|----------|----------|----------|-----------|-------|
|                    | imp                   | armadillo             | -7.19         | -6.40    | -3.10    | 0.46     | 1.24      |       |
|                    |                       | bobcat                | -8.16         | -7.51    | -4.67    | -1.81    | -1.23     |       |
|                    |                       | cottontail sp         | -1.64         | -1.22    | 1.13     | 3.44     | 3.92      |       |
|                    |                       | coyote                | -6.55         | -5.91    | -3.23    | -0.86    | -0.33     |       |
|                    |                       | eastern chipmunk      | -5.15         | -4.46    | -1.31    | 1.46     | 2.10      |       |
|                    |                       | elk                   | -10.82        | -10.03   | -5.87    | -1.62    | -0.55     |       |
|                    |                       | flying squirrel sp    | -4.30         | -3.53    | -0.11    | 3.20     | 3.92      |       |
|                    |                       | fox squirrel          | -4.30         | -3.61    | -0.17    | 3.35     | 4.13      |       |
|                    |                       | gray fox              | -6.58         | -5.70    | -2.12    | 1.02     | 1.69      |       |
|                    |                       | gray squirrel sp      | -0.71         | -0.28    | 1.76     | 3.71     | 4.08      |       |
|                    |                       | mule deer             | -9.33         | -8.49    | -4.82    | -0.96    | 0.12      |       |
|                    |                       | north american badger | -8.17         | -7.28    | -2.99    | 1.69     | 2.77      |       |
|                    |                       | north american beaver | -2.17         | -1.40    | 2.15     | 5.55     | 6.38      |       |
|                    |                       | north american mink   | -2.89         | -2.17    | 1.00     | 4.24     | 5.00      |       |
|                    |                       | raccoon               | -4.07         | -3.57    | -1.02    | 1.40     | 1.89      |       |
|                    |                       | red fox               | -3.82         | -2.92    | 0.85     | 4.57     | 5.34      |       |
|                    |                       | red squirrel          | -6.15         | -5.17    | -1.33    | 2.51     | 3.55      |       |
|                    |                       | striped skunk         | -3.98         | -3.40    | -0.76    | 1.65     | 2.14      |       |
|                    |                       | virginia opossum      | -2.20         | -1.78    | 0.38     | 2.64     | 3.09      |       |
|                    |                       | white tailed deer     | -8.07         | -7.48    | -4.52    | -1.24    | -0.60     |       |
|                    |                       | woodchuck             | -2.05         | -1.31    | 1.63     | 4.71     | 5.37      |       |
|                    |                       | gent X imp            | armadillo     | -6.39    | -5.41    | -2.01    | 1.41      | 2.65  |
|                    |                       |                       | bobcat        | -4.12    | -3.38    | -0.47    | 2.46      | 3.29  |
|                    |                       |                       | cottontail sp | -3.78    | -3.31    | -1.12    | 1.05      | 1.53  |
|                    |                       |                       | coyote        | -4.32    | -3.82    | -1.52    | 0.90      | 1.47  |
|                    | eastern chipmunk      |                       | -4.65         | -4.03    | -1.33    | 1.33     | 2.01      |       |
|                    | elk                   |                       | -4.77         | -4.14    | -1.08    | 1.95     | 2.75      |       |
|                    | flying squirrel sp    |                       | -4.77         | -4.10    | -1.23    | 1.76     | 2.50      |       |
|                    | fox squirrel          |                       | -3.80         | -3.18    | -0.60    | 2.04     | 2.67      |       |
|                    | gray fox              |                       | -3.71         | -2.93    | 0.08     | 2.96     | 3.62      |       |
|                    | gray squirrel sp      |                       | -5.47         | -4.77    | -2.19    | 0.09     | 0.60      |       |
|                    | mule deer             |                       | -5.03         | -4.30    | -1.36    | 1.70     | 2.50      |       |
|                    | north american badger |                       | -5.19         | -4.44    | -1.44    | 1.57     | 2.36      |       |
|                    | north american beaver |                       | -4.84         | -4.06    | -1.17    | 1.82     | 2.56      |       |
|                    | north american mink   |                       | -4.85         | -4.12    | -1.22    | 1.57     | 2.22      |       |
|                    | raccoon               |                       | -5.97         | -5.20    | -1.75    | 1.43     | 2.11      |       |
|                    | red fox               |                       | -4.71         | -4.08    | -1.50    | 1.12     | 1.79      |       |
|                    | red squirrel          |                       | -5.46         | -4.63    | -1.55    | 1.53     | 2.27      |       |
|                    | striped skunk         |                       | -5.08         | -4.35    | -1.31    | 1.82     | 2.76      |       |
|                    | virginia opossum      |                       | -3.17         | -2.68    | -0.32    | 2.25     | 2.79      |       |
|                    | white tailed deer     |                       | -3.96         | -3.37    | -0.80    | 1.88     | 2.56      |       |
|                    | woodchuck             | -5.04                 | -4.16         | -0.94    | 2.25     | 3.16     |           |       |
|                    | Metro LA, CA          | intercept             | armadillo     | -4.08    | -3.59    | -1.45    | 0.62      | 1.07  |
|                    |                       |                       | bobcat        | -2.14    | -2.06    | -1.67    | -1.32     | -1.25 |
|                    |                       |                       | cottontail sp | -1.32    | -1.26    | -0.98    | -0.71     | -0.66 |
| coyote             |                       |                       | -0.25         | -0.20    | 0.09     | 0.38     | 0.44      |       |
| eastern chipmunk   |                       |                       | -5.26         | -5.02    | -4.08    | -3.27    | -3.11     |       |
| elk                |                       |                       | -6.81         | -6.18    | -3.84    | -1.61    | -1.00     |       |
| flying squirrel sp |                       |                       | -7.01         | -6.57    | -4.52    | -2.55    | -2.17     |       |

**Table S25:** Species and city-specific occupancy parameters. Note that all of these species do not likely reside in this city (that is controlled by another level of the model). (continued)

| City | Parameter | Species               | CI(0.025) | CI(0.05) | Estimate | CI(0.95) | CI(0.975) |
|------|-----------|-----------------------|-----------|----------|----------|----------|-----------|
|      |           | fox squirrel          | -2.79     | -2.69    | -2.29    | -1.90    | -1.83     |
|      |           | gray fox              | -4.60     | -4.38    | -3.48    | -2.77    | -2.64     |
|      |           | gray squirrel sp      | -3.54     | -3.43    | -2.91    | -2.45    | -2.36     |
|      |           | mule deer             | -2.70     | -2.60    | -2.10    | -1.66    | -1.58     |
|      |           | north american badger | -8.26     | -7.75    | -5.22    | -2.96    | -2.50     |
|      |           | north american beaver | -7.00     | -6.53    | -4.43    | -2.48    | -2.07     |
|      |           | north american mink   | -5.83     | -5.30    | -3.02    | -0.96    | -0.53     |
|      |           | raccoon               | -1.85     | -1.77    | -1.44    | -1.11    | -1.05     |
|      |           | red fox               | -6.79     | -5.87    | -1.78    | 1.38     | 2.08      |
|      |           | red squirrel          | -7.18     | -6.38    | -3.36    | -0.84    | -0.25     |
|      |           | striped skunk         | -2.20     | -2.13    | -1.81    | -1.52    | -1.46     |
|      |           | virginia opossum      | -2.42     | -2.35    | -1.99    | -1.65    | -1.58     |
|      |           | white tailed deer     | -7.83     | -7.42    | -5.64    | -4.33    | -4.08     |
|      |           | woodchuck             | -4.79     | -4.35    | -2.53    | -0.73    | -0.37     |
|      | gent      | armadillo             | -1.04     | -0.88    | -0.20    | 0.48     | 0.63      |
|      |           | bobcat                | -0.55     | -0.44    | 0.12     | 0.68     | 0.79      |
|      |           | cottontail sp         | -0.50     | -0.38    | 0.10     | 0.52     | 0.60      |
|      |           | coyote                | -0.24     | -0.16    | 0.27     | 0.76     | 0.87      |
|      |           | eastern chipmunk      | -0.59     | -0.47    | 0.13     | 0.76     | 0.90      |
|      |           | elk                   | -1.38     | -1.17    | -0.18    | 0.69     | 0.87      |
|      |           | flying squirrel sp    | -1.19     | -1.03    | -0.19    | 0.64     | 0.81      |
|      |           | fox squirrel          | -0.53     | -0.44    | 0.07     | 0.64     | 0.76      |
|      |           | gray fox              | -0.69     | -0.53    | 0.11     | 0.74     | 0.87      |
|      |           | gray squirrel sp      | -0.72     | -0.61    | -0.09    | 0.43     | 0.54      |
|      |           | mule deer             | -0.83     | -0.69    | -0.03    | 0.59     | 0.74      |
|      |           | north american badger | -0.88     | -0.71    | 0.06     | 0.86     | 1.03      |
|      |           | north american beaver | -0.60     | -0.45    | 0.31     | 1.07     | 1.23      |
|      |           | north american mink   | -0.75     | -0.60    | 0.13     | 0.85     | 1.01      |
|      |           | raccoon               | -0.12     | -0.02    | 0.43     | 0.93     | 1.04      |
|      |           | red fox               | -0.50     | -0.38    | 0.18     | 0.73     | 0.85      |
|      |           | red squirrel          | -0.95     | -0.79    | -0.05    | 0.71     | 0.87      |
|      |           | striped skunk         | -0.93     | -0.80    | -0.24    | 0.28     | 0.38      |
|      |           | virginia opossum      | -0.38     | -0.27    | 0.22     | 0.76     | 0.87      |
|      |           | white tailed deer     | -0.51     | -0.37    | 0.22     | 0.78     | 0.90      |
|      |           | woodchuck             | -0.13     | 0.01     | 0.67     | 1.31     | 1.42      |
|      | imp       | armadillo             | -7.15     | -6.42    | -3.05    | 0.43     | 1.27      |
|      |           | bobcat                | -5.66     | -5.38    | -3.96    | -2.61    | -2.37     |
|      |           | cottontail sp         | -0.84     | -0.67    | 0.19     | 1.04     | 1.19      |
|      |           | coyote                | -2.07     | -1.91    | -1.14    | -0.36    | -0.22     |
|      |           | eastern chipmunk      | -4.77     | -4.20    | -1.58    | 0.63     | 1.03      |
|      |           | elk                   | -10.74    | -9.99    | -5.81    | -1.57    | -0.58     |
|      |           | flying squirrel sp    | -4.31     | -3.51    | -0.12    | 3.16     | 3.92      |
|      |           | fox squirrel          | -1.42     | -1.12    | 0.14     | 1.34     | 1.57      |
|      |           | gray fox              | -8.95     | -8.06    | -4.53    | -2.01    | -1.55     |
|      |           | gray squirrel sp      | -2.06     | -1.69    | 0.03     | 1.52     | 1.79      |
|      |           | mule deer             | -8.64     | -8.24    | -6.30    | -4.62    | -4.33     |
|      |           | north american badger | -8.21     | -7.21    | -2.87    | 1.65     | 2.65      |
|      |           | north american beaver | -2.46     | -1.70    | 1.97     | 5.47     | 6.19      |
|      |           | north american mink   | -3.17     | -2.33    | 1.03     | 4.19     | 4.94      |

**Table S25:** Species and city-specific occupancy parameters. Note that all of these species do not likely reside in this city (that is controlled by another level of the model). (continued)

| City                  | Parameter  | Species               | CI(0.025) | CI(0.05)      | Estimate | CI(0.95) | CI(0.975) |       |       |
|-----------------------|------------|-----------------------|-----------|---------------|----------|----------|-----------|-------|-------|
|                       | gent X imp | raccoon               | 0.47      | 0.64          | 1.61     | 2.61     | 2.81      |       |       |
|                       |            | red fox               | -3.85     | -3.01         | 0.85     | 4.68     | 5.41      |       |       |
|                       |            | red squirrel          | -6.40     | -5.46         | -1.35    | 2.49     | 3.48      |       |       |
|                       |            | striped skunk         | -1.07     | -0.88         | 0.05     | 0.96     | 1.15      |       |       |
|                       |            | virginia opossum      | 0.87      | 1.06          | 2.01     | 3.02     | 3.20      |       |       |
|                       |            | white tailed deer     | -8.86     | -8.16         | -4.89    | -1.50    | -0.85     |       |       |
|                       |            | woodchuck             | -2.28     | -1.62         | 1.56     | 4.65     | 5.42      |       |       |
|                       |            | armadillo             | -6.42     | -5.48         | -2.04    | 1.26     | 2.38      |       |       |
|                       |            | bobcat                | -3.93     | -3.21         | -0.51    | 2.17     | 2.82      |       |       |
|                       |            | cottontail sp         | -4.46     | -3.96         | -1.59    | 0.62     | 1.17      |       |       |
|                       |            | coyote                | -3.93     | -3.57         | -1.78    | -0.06    | 0.30      |       |       |
|                       |            | eastern chipmunk      | -4.78     | -4.10         | -1.46    | 1.29     | 1.93      |       |       |
|                       |            | elk                   | -4.75     | -3.98         | -1.05    | 2.01     | 2.80      |       |       |
|                       |            | flying squirrel sp    | -4.88     | -4.16         | -1.22    | 1.70     | 2.40      |       |       |
|                       |            | fox squirrel          | -4.60     | -3.95         | -1.33    | 0.77     | 1.16      |       |       |
|                       |            | gray fox              | -3.75     | -3.01         | 0.06     | 2.91     | 3.53      |       |       |
|                       |            | gray squirrel sp      | -4.89     | -4.29         | -1.86    | 0.48     | 0.98      |       |       |
|                       |            | mule deer             | -5.42     | -4.58         | -1.45    | 1.35     | 2.01      |       |       |
|                       |            | north american badger | -5.11     | -4.38         | -1.42    | 1.51     | 2.23      |       |       |
|                       |            | north american beaver | -5.01     | -4.25         | -1.16    | 1.83     | 2.51      |       |       |
|                       |            | north american mink   | -4.85     | -4.13         | -1.22    | 1.62     | 2.42      |       |       |
|                       |            | raccoon               | -3.85     | -3.33         | -0.71    | 2.34     | 3.16      |       |       |
|                       |            | red fox               | -4.74     | -4.10         | -1.53    | 1.06     | 1.69      |       |       |
|                       |            | red squirrel          | -5.52     | -4.72         | -1.57    | 1.51     | 2.24      |       |       |
|                       |            | striped skunk         | -5.75     | -4.90         | -1.84    | 0.69     | 1.32      |       |       |
|                       |            | virginia opossum      | -1.98     | -1.63         | 0.13     | 2.05     | 2.44      |       |       |
|                       |            | white tailed deer     | -4.26     | -3.63         | -0.97    | 1.66     | 2.29      |       |       |
|                       |            | woodchuck             | -5.12     | -4.23         | -0.88    | 2.32     | 3.11      |       |       |
|                       |            | Washington D.C.       | intercept | armadillo     | -4.03    | -3.55    | -1.44     | 0.63  | 1.08  |
|                       |            |                       |           | bobcat        | -4.91    | -4.46    | -2.50     | -0.70 | -0.35 |
|                       |            |                       |           | cottontail sp | -2.28    | -2.22    | -1.91     | -1.61 | -1.55 |
|                       |            |                       |           | coyote        | -2.24    | -2.18    | -1.82     | -1.46 | -1.39 |
| eastern chipmunk      | -2.47      |                       |           | -2.40         | -2.07    | -1.75    | -1.69     |       |       |
| elk                   | -6.49      |                       |           | -6.00         | -3.78    | -1.55    | -0.96     |       |       |
| flying squirrel sp    | -5.53      |                       |           | -5.31         | -4.28    | -3.40    | -3.24     |       |       |
| fox squirrel          | -7.64      |                       |           | -6.60         | -1.74    | 1.49     | 2.18      |       |       |
| gray fox              | -5.20      |                       |           | -5.03         | -4.19    | -3.49    | -3.37     |       |       |
| gray squirrel sp      | 1.08       |                       |           | 1.16          | 1.54     | 1.95     | 2.03      |       |       |
| mule deer             | -5.91      |                       |           | -5.17         | -2.00    | 1.00     | 1.66      |       |       |
| north american badger | -7.97      |                       |           | -7.39         | -4.99    | -2.76    | -2.29     |       |       |
| north american beaver | -7.33      |                       |           | -6.87         | -4.75    | -2.63    | -2.17     |       |       |
| north american mink   | -5.33      |                       |           | -5.04         | -3.71    | -2.39    | -2.12     |       |       |
| raccoon               | 0.82       |                       |           | 0.88          | 1.23     | 1.60     | 1.67      |       |       |
| red fox               | 0.96       |                       |           | 1.03          | 1.42     | 1.84     | 1.93      |       |       |
| red squirrel          | -8.20      |                       |           | -7.37         | -3.60    | -0.90    | -0.29     |       |       |
| striped skunk         | -4.94      |                       |           | -4.51         | -2.43    | -0.79    | -0.46     |       |       |
| virginia opossum      | -1.55      |                       |           | -1.49         | -1.21    | -0.95    | -0.90     |       |       |
| white tailed deer     | 0.49       |                       |           | 0.56          | 0.94     | 1.33     | 1.40      |       |       |
| woodchuck             | -2.97      | -2.89                 | -2.49     | -2.11         | -2.04    |          |           |       |       |

**Table S25:** Species and city-specific occupancy parameters. Note that all of these species do not likely reside in this city (that is controlled by another level of the model). (continued)

| City | Parameter             | Species               | CI(0.025)        | CI(0.05) | Estimate | CI(0.95) | CI(0.975) |       |
|------|-----------------------|-----------------------|------------------|----------|----------|----------|-----------|-------|
|      | gent                  | armadillo             | -1.01            | -0.87    | -0.20    | 0.47     | 0.61      |       |
|      |                       | bobcat                | -0.75            | -0.62    | 0.04     | 0.67     | 0.82      |       |
|      |                       | cottontail sp         | -0.14            | -0.07    | 0.28     | 0.63     | 0.70      |       |
|      |                       | coyote                | -0.33            | -0.25    | 0.17     | 0.63     | 0.72      |       |
|      |                       | eastern chipmunk      | -0.91            | -0.78    | -0.19    | 0.31     | 0.41      |       |
|      |                       | elk                   | -1.36            | -1.16    | -0.20    | 0.70     | 0.88      |       |
|      |                       | flying squirrel sp    | -1.25            | -1.08    | -0.23    | 0.58     | 0.75      |       |
|      |                       | fox squirrel          | -0.71            | -0.59    | -0.03    | 0.56     | 0.70      |       |
|      |                       | gray fox              | -0.73            | -0.58    | 0.09     | 0.72     | 0.86      |       |
|      |                       | gray squirrel sp      | -0.59            | -0.51    | -0.10    | 0.33     | 0.41      |       |
|      |                       | mule deer             | -0.77            | -0.63    | 0.03     | 0.72     | 0.88      |       |
|      |                       | north american badger | -0.88            | -0.73    | 0.06     | 0.84     | 1.00      |       |
|      |                       | north american beaver | -0.62            | -0.46    | 0.31     | 1.07     | 1.24      |       |
|      |                       | north american mink   | -0.71            | -0.57    | 0.14     | 0.86     | 0.99      |       |
|      |                       | raccoon               | 0.15             | 0.22     | 0.61     | 1.07     | 1.18      |       |
|      |                       | red fox               | -0.25            | -0.18    | 0.23     | 0.66     | 0.75      |       |
|      |                       | red squirrel          | -0.96            | -0.81    | -0.07    | 0.71     | 0.85      |       |
|      |                       | striped skunk         | -0.91            | -0.77    | -0.17    | 0.42     | 0.56      |       |
|      |                       | virginia opossum      | 0.06             | 0.12     | 0.48     | 0.87     | 0.95      |       |
|      |                       | white tailed deer     | -0.02            | 0.07     | 0.50     | 1.03     | 1.15      |       |
|      |                       | woodchuck             | 0.24             | 0.33     | 0.81     | 1.34     | 1.44      |       |
|      |                       | imp                   | armadillo        | -7.31    | -6.48    | -3.11    | 0.41      | 1.15  |
|      |                       |                       | bobcat           | -8.18    | -7.60    | -4.69    | -1.71     | -1.04 |
|      |                       |                       | cottontail sp    | -2.11    | -1.81    | -0.19    | 1.42      | 1.75  |
|      |                       |                       | coyote           | -4.47    | -4.06    | -2.19    | -0.38     | -0.01 |
|      |                       |                       | eastern chipmunk | -1.94    | -1.56    | 0.24     | 2.15      | 2.53  |
|      | elk                   |                       | -10.95           | -9.98    | -5.89    | -1.53    | -0.51     |       |
|      | flying squirrel sp    |                       | -4.15            | -3.49    | -0.30    | 2.64     | 3.19      |       |
|      | fox squirrel          |                       | -4.36            | -3.57    | -0.16    | 3.35     | 4.22      |       |
|      | gray fox              |                       | -5.75            | -5.09    | -1.95    | 0.84     | 1.39      |       |
|      | gray squirrel sp      |                       | -0.69            | -0.35    | 1.31     | 2.89     | 3.24      |       |
|      | mule deer             |                       | -9.25            | -8.40    | -4.83    | -1.07    | -0.19     |       |
|      | north american badger |                       | -8.23            | -7.29    | -2.96    | 1.67     | 2.90      |       |
|      | north american beaver |                       | -2.45            | -1.63    | 1.95     | 5.46     | 6.23      |       |
|      | north american mink   |                       | -2.92            | -2.26    | 0.90     | 3.81     | 4.38      |       |
|      | raccoon               |                       | -2.23            | -1.92    | -0.26    | 1.41     | 1.72      |       |
|      | red fox               |                       | -4.40            | -4.03    | -2.14    | -0.32    | 0.06      |       |
|      | red squirrel          |                       | -6.29            | -5.29    | -1.35    | 2.48     | 3.37      |       |
|      | striped skunk         |                       | -3.89            | -3.21    | -0.41    | 2.27     | 2.86      |       |
|      | virginia opossum      |                       | -1.95            | -1.65    | -0.21    | 1.18     | 1.44      |       |
|      | white tailed deer     |                       | -9.37            | -8.89    | -6.59    | -4.53    | -4.17     |       |
|      | woodchuck             |                       | -1.15            | -0.74    | 1.32     | 3.22     | 3.61      |       |
|      | gent X imp            |                       | armadillo        | -6.42    | -5.44    | -2.06    | 1.47      | 2.59  |
|      |                       |                       | bobcat           | -4.02    | -3.36    | -0.47    | 2.42      | 3.12  |
|      |                       |                       | cottontail sp    | -3.05    | -2.68    | -0.86    | 0.98      | 1.35  |
|      |                       |                       | coyote           | -4.25    | -3.82    | -1.69    | 0.36      | 0.80  |
|      |                       |                       | eastern chipmunk | -3.90    | -3.40    | -1.14    | 1.37      | 1.93  |
|      |                       | elk                   | -4.80            | -4.03    | -1.04    | 2.10     | 2.93      |       |
|      |                       | flying squirrel sp    | -4.87            | -4.19    | -1.24    | 1.64     | 2.44      |       |

**Table S25:** Species and city-specific occupancy parameters. Note that all of these species do not likely reside in this city (that is controlled by another level of the model). (continued)

| City                  | Parameter             | Species               | CI(0.025) | CI(0.05) | Estimate | CI(0.95) | CI(0.975) |
|-----------------------|-----------------------|-----------------------|-----------|----------|----------|----------|-----------|
| Phoenix, AZ           | intercept             | fox squirrel          | -3.80     | -3.20    | -0.62    | 2.08     | 2.77      |
|                       |                       | gray fox              | -3.72     | -2.98    | 0.07     | 2.94     | 3.53      |
|                       |                       | gray squirrel sp      | -4.78     | -4.36    | -2.16    | -0.13    | 0.26      |
|                       |                       | mule deer             | -5.15     | -4.33    | -1.33    | 1.60     | 2.38      |
|                       |                       | north american badger | -5.14     | -4.44    | -1.40    | 1.61     | 2.43      |
|                       |                       | north american beaver | -4.87     | -4.15    | -1.19    | 1.80     | 2.50      |
|                       |                       | north american mink   | -5.25     | -4.37    | -1.44    | 1.41     | 2.04      |
|                       |                       | raccoon               | -4.29     | -3.68    | -1.16    | 1.37     | 1.91      |
|                       |                       | red fox               | -4.87     | -4.32    | -2.03    | 0.05     | 0.46      |
|                       |                       | red squirrel          | -5.53     | -4.74    | -1.60    | 1.44     | 2.15      |
|                       |                       | striped skunk         | -5.22     | -4.39    | -1.35    | 1.77     | 2.65      |
|                       |                       | virginia opossum      | -1.80     | -1.45    | 0.33     | 2.33     | 2.78      |
|                       |                       | white tailed deer     | -3.84     | -3.32    | -1.04    | 1.19     | 1.63      |
|                       |                       | woodchuck             | -4.76     | -4.19    | -1.36    | 1.16     | 1.72      |
|                       |                       | armadillo             | -4.07     | -3.53    | -1.46    | 0.64     | 1.09      |
|                       |                       | bobcat                | -1.76     | -1.69    | -1.33    | -0.98    | -0.91     |
|                       |                       | cottontail sp         | -1.22     | -1.16    | -0.87    | -0.59    | -0.53     |
|                       |                       | coyote                | 0.40      | 0.47     | 0.85     | 1.25     | 1.32      |
|                       |                       | eastern chipmunk      | -4.93     | -4.51    | -2.68    | -0.96    | -0.58     |
|                       |                       | elk                   | -6.81     | -6.26    | -3.82    | -1.59    | -1.01     |
|                       |                       | flying squirrel sp    | -6.82     | -6.37    | -4.35    | -2.45    | -2.03     |
|                       | fox squirrel          | -6.95                 | -5.78     | -1.63    | 1.56     | 2.25     |           |
|                       | gray fox              | -2.35                 | -2.27     | -1.86    | -1.45    | -1.37    |           |
|                       | gray squirrel sp      | -2.25                 | -1.85     | 0.33     | 2.48     | 2.91     |           |
|                       | mule deer             | -4.52                 | -4.32     | -3.50    | -2.82    | -2.71    |           |
|                       | north american badger | -5.33                 | -5.10     | -4.09    | -3.27    | -3.11    |           |
|                       | north american beaver | -6.50                 | -6.24     | -5.00    | -3.96    | -3.78    |           |
|                       | north american mink   | -5.83                 | -5.29     | -3.02    | -0.98    | -0.53    |           |
|                       | raccoon               | -2.04                 | -1.98     | -1.67    | -1.38    | -1.32    |           |
|                       | red fox               | -5.79                 | -5.04     | -1.67    | 1.47     | 2.20     |           |
|                       | red squirrel          | -7.78                 | -6.93     | -3.41    | -0.87    | -0.31    |           |
|                       | striped skunk         | -3.26                 | -3.16     | -2.71    | -2.27    | -2.18    |           |
|                       | virginia opossum      | -3.51                 | -3.04     | -0.80    | 1.41     | 1.84     |           |
|                       | white tailed deer     | -8.10                 | -7.69     | -5.97    | -4.66    | -4.45    |           |
|                       | woodchuck             | -4.78                 | -4.36     | -2.53    | -0.81    | -0.42    |           |
|                       | gent                  | armadillo             | -1.01     | -0.87    | -0.20    | 0.49     | 0.64      |
|                       | bobcat                | -0.46                 | -0.38     | 0.04     | 0.46     | 0.53     |           |
|                       | cottontail sp         | -0.03                 | 0.03      | 0.35     | 0.68     | 0.75     |           |
|                       | coyote                | -0.18                 | -0.10     | 0.28     | 0.73     | 0.82     |           |
|                       | eastern chipmunk      | -0.71                 | -0.57     | 0.07     | 0.70     | 0.84     |           |
|                       | elk                   | -1.40                 | -1.16     | -0.19    | 0.69     | 0.85     |           |
|                       | flying squirrel sp    | -1.24                 | -1.05     | -0.18    | 0.65     | 0.81     |           |
| fox squirrel          | -0.69                 | -0.56                 | -0.03     | 0.57     | 0.70     |          |           |
| gray fox              | -0.44                 | -0.35                 | 0.09      | 0.53     | 0.61     |          |           |
| gray squirrel sp      | -0.75                 | -0.63                 | -0.09     | 0.47     | 0.60     |          |           |
| mule deer             | -0.59                 | -0.47                 | 0.09      | 0.65     | 0.75     |          |           |
| north american badger | -0.68                 | -0.55                 | 0.15      | 0.81     | 0.94     |          |           |
| north american beaver | -0.53                 | -0.38                 | 0.34      | 1.08     | 1.24     |          |           |
| north american mink   | -0.75                 | -0.61                 | 0.14      | 0.88     | 1.03     |          |           |

**Table S25:** Species and city-specific occupancy parameters. Note that all of these species do not likely reside in this city (that is controlled by another level of the model). (continued)

| City | Parameter             | Species            | CI(0.025)             | CI(0.05) | Estimate | CI(0.95) | CI(0.975) |       |
|------|-----------------------|--------------------|-----------------------|----------|----------|----------|-----------|-------|
|      | imp                   | raccoon            | -0.19                 | -0.12    | 0.23     | 0.55     | 0.61      |       |
|      |                       | red fox            | -0.51                 | -0.38    | 0.17     | 0.73     | 0.84      |       |
|      |                       | red squirrel       | -0.96                 | -0.81    | -0.05    | 0.71     | 0.87      |       |
|      |                       | striped skunk      | -0.95                 | -0.85    | -0.32    | 0.13     | 0.22      |       |
|      |                       | virginia opossum   | -0.59                 | -0.45    | 0.13     | 0.72     | 0.85      |       |
|      |                       | white tailed deer  | -0.56                 | -0.43    | 0.17     | 0.71     | 0.81      |       |
|      |                       | woodchuck          | -0.12                 | 0.02     | 0.67     | 1.31     | 1.44      |       |
|      |                       | armadillo          | -7.20                 | -6.47    | -3.10    | 0.42     | 1.23      |       |
|      |                       | bobcat             | -7.24                 | -6.95    | -5.54    | -4.22    | -3.98     |       |
|      |                       | cottontail sp      | -3.03                 | -2.82    | -1.73    | -0.68    | -0.46     |       |
|      |                       | coyote             | -6.02                 | -5.73    | -4.33    | -3.00    | -2.75     |       |
|      |                       | eastern chipmunk   | -5.03                 | -4.30    | -1.13    | 1.97     | 2.74      |       |
|      |                       | elk                | -10.65                | -9.83    | -5.82    | -1.54    | -0.56     |       |
|      |                       | flying squirrel sp | -4.23                 | -3.53    | -0.11    | 3.20     | 3.89      |       |
|      |                       | fox squirrel       | -4.27                 | -3.52    | -0.18    | 3.40     | 4.23      |       |
|      |                       | gray fox           | -5.27                 | -4.95    | -3.27    | -1.69    | -1.39     |       |
|      |                       | gray squirrel sp   | -0.80                 | -0.34    | 2.03     | 4.43     | 4.89      |       |
|      |                       | mule deer          | -10.52                | -9.80    | -6.62    | -4.22    | -3.78     |       |
|      |                       | gent X imp         | north american badger | -10.25   | -9.35    | -5.39    | -2.28     | -1.71 |
|      |                       |                    | north american beaver | -1.68    | -1.08    | 1.96     | 5.00      | 5.62  |
|      | north american mink   |                    | -3.12                 | -2.34    | 1.01     | 4.19     | 4.99      |       |
|      | raccoon               |                    | -1.41                 | -1.15    | 0.06     | 1.20     | 1.41      |       |
|      | red fox               |                    | -3.88                 | -2.92    | 0.82     | 4.76     | 5.60      |       |
|      | red squirrel          |                    | -6.30                 | -5.25    | -1.33    | 2.63     | 3.56      |       |
|      | striped skunk         |                    | -2.71                 | -2.41    | -0.75    | 0.87     | 1.21      |       |
|      | virginia opossum      |                    | -2.98                 | -2.43    | 0.22     | 2.80     | 3.37      |       |
|      | white tailed deer     |                    | -9.29                 | -8.49    | -5.15    | -1.82    | -1.13     |       |
|      | woodchuck             |                    | -2.24                 | -1.53    | 1.52     | 4.59     | 5.23      |       |
|      | armadillo             |                    | -6.44                 | -5.36    | -2.01    | 1.35     | 2.53      |       |
|      | bobcat                |                    | -2.26                 | -1.93    | -0.16    | 1.70     | 2.09      |       |
|      | cottontail sp         |                    | -2.76                 | -2.50    | -1.14    | 0.19     | 0.46      |       |
|      | coyote                |                    | -3.81                 | -3.50    | -1.89    | -0.34    | -0.04     |       |
|      | eastern chipmunk      |                    | -4.80                 | -4.08    | -1.42    | 1.37     | 2.09      |       |
|      | elk                   |                    | -4.91                 | -4.13    | -1.04    | 2.05     | 2.87      |       |
|      | flying squirrel sp    |                    | -4.76                 | -4.09    | -1.20    | 1.77     | 2.47      |       |
|      | fox squirrel          |                    | -3.96                 | -3.27    | -0.58    | 2.12     | 2.72      |       |
|      | gray fox              |                    | -0.53                 | -0.22    | 1.59     | 3.55     | 4.00      |       |
|      | gray squirrel sp      |                    | -4.69                 | -4.12    | -1.69    | 0.88     | 1.52      |       |
|      | mule deer             | -5.37              | -4.72                 | -2.09    | 0.17     | 0.62     |           |       |
|      | north american badger | -5.72              | -5.07                 | -2.18    | 0.14     | 0.56     |           |       |
|      | north american beaver | -4.46              | -3.84                 | -1.11    | 1.67     | 2.26     |           |       |
|      | north american mink   | -4.90              | -4.17                 | -1.20    | 1.64     | 2.31     |           |       |
|      | raccoon               | -2.29              | -2.02                 | -0.50    | 1.12     | 1.43     |           |       |
|      | red fox               | -4.73              | -4.13                 | -1.54    | 1.16     | 1.87     |           |       |
|      | red squirrel          | -5.48              | -4.78                 | -1.58    | 1.46     | 2.11     |           |       |
|      | striped skunk         | -2.25              | -1.88                 | 0.24     | 3.01     | 3.64     |           |       |
|      | virginia opossum      | -3.88              | -3.19                 | -0.61    | 1.87     | 2.43     |           |       |
|      | white tailed deer     | -4.02              | -3.37                 | -0.84    | 1.84     | 2.45     |           |       |
|      | woodchuck             | -5.02              | -4.24                 | -0.91    | 2.32     | 3.21     |           |       |

**Table S25:** Species and city-specific occupancy parameters. Note that all of these species do not likely reside in this city (that is controlled by another level of the model). (continued)

| City               | Parameter             | Species               | CI(0.025)     | CI(0.05) | Estimate | CI(0.95) | CI(0.975) |      |
|--------------------|-----------------------|-----------------------|---------------|----------|----------|----------|-----------|------|
| Portland, Oregon   | intercept             | armadillo             | -4.12         | -3.62    | -1.48    | 0.61     | 1.04      |      |
|                    |                       | bobcat                | -5.44         | -5.06    | -3.13    | -1.16    | -0.76     |      |
|                    |                       | cottontail sp         | -0.95         | -0.86    | -0.43    | 0.00     | 0.09      |      |
|                    |                       | coyote                | -0.58         | -0.49    | -0.05    | 0.43     | 0.52      |      |
|                    |                       | eastern chipmunk      | -4.99         | -4.59    | -2.72    | -0.93    | -0.54     |      |
|                    |                       | elk                   | -7.02         | -6.45    | -4.40    | -2.28    | -1.67     |      |
|                    |                       | flying squirrel sp    | -7.07         | -6.61    | -4.70    | -3.12    | -2.81     |      |
|                    |                       | fox squirrel          | -0.35         | -0.25    | 0.22     | 0.72     | 0.82      |      |
|                    |                       | gray fox              | -7.40         | -6.89    | -4.45    | -2.06    | -1.44     |      |
|                    |                       | gray squirrel sp      | -0.43         | -0.36    | 0.07     | 0.52     | 0.60      |      |
|                    |                       | mule deer             | -1.68         | -1.58    | -1.05    | -0.55    | -0.45     |      |
|                    |                       | north american badger | -7.94         | -7.36    | -5.04    | -2.92    | -2.37     |      |
|                    |                       | north american beaver | -5.98         | -5.64    | -4.11    | -2.65    | -2.37     |      |
|                    |                       | north american mink   | -6.25         | -5.70    | -3.41    | -1.34    | -0.95     |      |
|                    |                       | raccoon               | -1.12         | -1.04    | -0.56    | -0.09    | 0.00      |      |
|                    |                       | red fox               | -6.96         | -6.33    | -3.23    | 0.88     | 1.52      |      |
|                    |                       | red squirrel          | -7.26         | -6.45    | -3.37    | -0.85    | -0.27     |      |
|                    |                       | striped skunk         | -3.63         | -3.43    | -2.44    | -1.44    | -1.19     |      |
|                    |                       | virginia opossum      | -2.53         | -2.42    | -1.82    | -1.28    | -1.20     |      |
|                    |                       | white tailed deer     | -8.52         | -7.66    | -3.71    | 1.77     | 2.65      |      |
|                    |                       | woodchuck             | -4.78         | -4.34    | -2.56    | -0.74    | -0.38     |      |
|                    |                       | gent                  | armadillo     | -1.03    | -0.87    | -0.20    | 0.48      | 0.63 |
|                    |                       |                       | bobcat        | -0.76    | -0.63    | 0.02     | 0.67      | 0.82 |
|                    |                       |                       | cottontail sp | -0.33    | -0.23    | 0.24     | 0.68      | 0.77 |
|                    | coyote                |                       | -0.58         | -0.46    | 0.04     | 0.54     | 0.64      |      |
|                    | eastern chipmunk      |                       | -0.70         | -0.54    | 0.08     | 0.71     | 0.84      |      |
|                    | elk                   |                       | -1.41         | -1.17    | -0.19    | 0.70     | 0.87      |      |
|                    | flying squirrel sp    |                       | -1.24         | -1.06    | -0.19    | 0.65     | 0.81      |      |
|                    | fox squirrel          |                       | -0.68         | -0.57    | -0.05    | 0.50     | 0.60      |      |
|                    | gray fox              |                       | -0.65         | -0.50    | 0.15     | 0.80     | 0.92      |      |
|                    | gray squirrel sp      |                       | -0.78         | -0.67    | -0.16    | 0.30     | 0.39      |      |
|                    | mule deer             |                       | -0.58         | -0.46    | 0.15     | 0.82     | 0.97      |      |
|                    | north american badger |                       | -0.91         | -0.73    | 0.07     | 0.85     | 1.01      |      |
|                    | north american beaver |                       | -0.52         | -0.36    | 0.37     | 1.13     | 1.28      |      |
|                    | north american mink   |                       | -0.76         | -0.61    | 0.12     | 0.86     | 1.00      |      |
|                    | raccoon               |                       | -0.15         | -0.05    | 0.41     | 0.91     | 1.02      |      |
|                    | red fox               |                       | -0.51         | -0.38    | 0.17     | 0.72     | 0.86      |      |
|                    | red squirrel          |                       | -0.94         | -0.80    | -0.05    | 0.71     | 0.86      |      |
|                    | striped skunk         |                       | -0.72         | -0.61    | -0.06    | 0.55     | 0.69      |      |
|                    | virginia opossum      |                       | -0.31         | -0.20    | 0.30     | 0.91     | 1.05      |      |
|                    | white tailed deer     |                       | -0.48         | -0.35    | 0.22     | 0.78     | 0.91      |      |
|                    | woodchuck             |                       | -0.11         | 0.03     | 0.67     | 1.31     | 1.45      |      |
|                    | imp                   |                       | armadillo     | -7.22    | -6.42    | -3.03    | 0.39      | 1.26 |
|                    |                       | bobcat                | -7.99         | -7.37    | -4.58    | -1.66    | -0.98     |      |
|                    |                       | cottontail sp         | -2.83         | -2.35    | -0.13    | 1.97     | 2.40      |      |
|                    |                       | coyote                | -4.59         | -4.18    | -2.04    | 0.08     | 0.49      |      |
| eastern chipmunk   |                       | -5.19                 | -4.39         | -1.17    | 1.97     | 2.62     |           |      |
| elk                |                       | -10.62                | -9.71         | -5.76    | -1.54    | -0.46    |           |      |
| flying squirrel sp |                       | -4.18                 | -3.48         | -0.07    | 3.21     | 3.91     |           |      |



**Table S25:** Species and city-specific occupancy parameters. Note that all of these species do not likely reside in this city (that is controlled by another level of the model). (continued)

| City          | Parameter  | Species               | CI(0.025) | CI(0.05) | Estimate | CI(0.95) | CI(0.975) |
|---------------|------------|-----------------------|-----------|----------|----------|----------|-----------|
|               |            | fox squirrel          | -2.80     | -2.27    | 0.17     | 2.64     | 3.19      |
|               |            | gray fox              | -5.72     | -4.95    | -1.42    | 1.92     | 2.67      |
|               |            | gray squirrel sp      | -0.92     | -0.49    | 1.49     | 3.29     | 3.66      |
|               |            | mule deer             | -6.95     | -6.47    | -3.91    | -1.11    | -0.54     |
|               |            | north american badger | -8.21     | -7.23    | -2.96    | 1.66     | 2.81      |
|               |            | north american beaver | -1.65     | -0.99    | 2.46     | 6.06     | 6.94      |
|               |            | north american mink   | -3.19     | -2.33    | 0.99     | 4.22     | 4.86      |
|               |            | raccoon               | -2.53     | -2.06    | 0.31     | 2.65     | 3.17      |
|               |            | red fox               | -3.78     | -3.01    | 0.80     | 4.57     | 5.40      |
|               |            | red squirrel          | -6.38     | -5.34    | -1.35    | 2.56     | 3.60      |
|               |            | striped skunk         | -2.56     | -2.05    | 0.43     | 3.43     | 4.11      |
|               |            | virginia opossum      | -1.92     | -1.52    | 0.69     | 3.00     | 3.51      |
|               |            | white tailed deer     | -9.87     | -9.09    | -5.43    | -1.64    | -0.80     |
|               |            | woodchuck             | -2.15     | -1.49    | 1.57     | 4.63     | 5.40      |
|               | gent X imp | armadillo             | -6.48     | -5.47    | -2.06    | 1.34     | 2.44      |
|               |            | bobcat                | -4.14     | -3.46    | -0.49    | 2.46     | 3.18      |
|               |            | cottontail sp         | -4.32     | -3.72    | -1.39    | 0.64     | 1.13      |
|               |            | coyote                | -5.07     | -4.46    | -2.00    | 0.25     | 0.74      |
|               |            | eastern chipmunk      | -4.86     | -4.16    | -1.40    | 1.31     | 1.88      |
|               |            | elk                   | -4.90     | -4.13    | -1.09    | 1.97     | 2.73      |
|               |            | flying squirrel sp    | -4.88     | -4.24    | -1.23    | 1.76     | 2.50      |
|               |            | fox squirrel          | -4.03     | -3.45    | -0.78    | 1.75     | 2.35      |
|               |            | gray fox              | -3.86     | -3.07    | 0.06     | 2.91     | 3.61      |
|               |            | gray squirrel sp      | -4.58     | -4.06    | -1.76    | 0.62     | 1.17      |
|               |            | mule deer             | -5.38     | -4.52    | -1.45    | 1.41     | 2.14      |
|               |            | north american badger | -5.12     | -4.42    | -1.43    | 1.58     | 2.38      |
|               |            | north american beaver | -4.24     | -3.62    | -0.85    | 2.31     | 3.15      |
|               |            | north american mink   | -4.89     | -4.22    | -1.23    | 1.68     | 2.48      |
|               |            | raccoon               | -3.90     | -3.28    | -0.32    | 3.25     | 4.21      |
|               |            | red fox               | -4.94     | -4.23    | -1.53    | 1.14     | 1.83      |
|               |            | red squirrel          | -5.53     | -4.76    | -1.57    | 1.44     | 2.16      |
|               |            | striped skunk         | -3.83     | -3.26    | -0.56    | 3.24     | 4.45      |
|               |            | virginia opossum      | -2.93     | -2.48    | -0.21    | 2.31     | 2.88      |
|               |            | white tailed deer     | -4.30     | -3.70    | -1.01    | 1.59     | 2.21      |
|               |            | woodchuck             | -5.06     | -4.22    | -0.90    | 2.35     | 3.20      |
| Rochester, NY | intercept  | armadillo             | -4.12     | -3.60    | -1.45    | 0.58     | 1.04      |
|               |            | bobcat                | -4.99     | -4.55    | -2.53    | -0.69    | -0.26     |
|               |            | cottontail sp         | -1.87     | -1.77    | -1.32    | -0.90    | -0.82     |
|               |            | coyote                | -2.02     | -1.93    | -1.44    | -0.94    | -0.85     |
|               |            | eastern chipmunk      | -2.13     | -2.04    | -1.61    | -1.21    | -1.14     |
|               |            | elk                   | -6.51     | -5.97    | -3.77    | -1.57    | -1.05     |
|               |            | flying squirrel sp    | -5.24     | -5.01    | -3.97    | -3.11    | -2.95     |
|               |            | fox squirrel          | -7.44     | -6.54    | -1.89    | 1.36     | 2.06      |
|               |            | gray fox              | -4.42     | -4.22    | -3.32    | -2.54    | -2.39     |
|               |            | gray squirrel sp      | 1.01      | 1.11     | 1.65     | 2.26     | 2.38      |
|               |            | mule deer             | -5.88     | -5.14    | -2.04    | 1.02     | 1.74      |
|               |            | north american badger | -7.98     | -7.44    | -5.10    | -2.86    | -2.35     |
|               |            | north american beaver | -6.08     | -5.76    | -4.23    | -2.85    | -2.56     |
|               |            | north american mink   | -4.65     | -4.37    | -3.03    | -1.71    | -1.42     |

**Table S25:** Species and city-specific occupancy parameters. Note that all of these species do not likely reside in this city (that is controlled by another level of the model). (*continued*)

| City | Parameter         | Species               | CI(0.025) | CI(0.05) | Estimate | CI(0.95) | CI(0.975) |
|------|-------------------|-----------------------|-----------|----------|----------|----------|-----------|
|      | gent              | raccoon               | -0.23     | -0.15    | 0.29     | 0.74     | 0.83      |
|      |                   | red fox               | 0.18      | 0.27     | 0.72     | 1.24     | 1.33      |
|      |                   | red squirrel          | -2.90     | -2.77    | -2.19    | -1.65    | -1.55     |
|      |                   | striped skunk         | -3.41     | -3.22    | -2.35    | -1.39    | -1.16     |
|      |                   | virginia opossum      | -1.19     | -1.10    | -0.69    | -0.29    | -0.21     |
|      |                   | white tailed deer     | -0.46     | -0.37    | 0.10     | 0.58     | 0.68      |
|      |                   | woodchuck             | -2.87     | -2.76    | -2.20    | -1.67    | -1.56     |
|      |                   | armadillo             | -1.03     | -0.88    | -0.20    | 0.48     | 0.61      |
|      |                   | bobcat                | -0.76     | -0.62    | 0.04     | 0.69     | 0.81      |
|      |                   | cottontail sp         | -0.48     | -0.37    | 0.15     | 0.60     | 0.68      |
|      |                   | coyote                | -0.61     | -0.47    | 0.05     | 0.56     | 0.66      |
|      |                   | eastern chipmunk      | -0.69     | -0.54    | 0.04     | 0.60     | 0.70      |
|      |                   | elk                   | -1.40     | -1.18    | -0.19    | 0.69     | 0.87      |
|      |                   | flying squirrel sp    | -1.25     | -1.06    | -0.22    | 0.62     | 0.79      |
|      |                   | fox squirrel          | -0.69     | -0.58    | -0.03    | 0.58     | 0.72      |
|      |                   | gray fox              | -0.67     | -0.52    | 0.14     | 0.76     | 0.88      |
|      |                   | gray squirrel sp      | -0.59     | -0.48    | 0.02     | 0.59     | 0.71      |
|      |                   | mule deer             | -0.80     | -0.64    | 0.02     | 0.70     | 0.86      |
|      |                   | north american badger | -0.89     | -0.72    | 0.06     | 0.85     | 1.00      |
|      |                   | north american beaver | -0.65     | -0.48    | 0.29     | 1.06     | 1.21      |
|      |                   | north american mink   | -0.79     | -0.64    | 0.10     | 0.82     | 0.97      |
|      |                   | raccoon               | -0.22     | -0.11    | 0.37     | 0.87     | 0.97      |
|      |                   | red fox               | -0.48     | -0.37    | 0.15     | 0.64     | 0.76      |
|      |                   | red squirrel          | -0.84     | -0.68    | 0.03     | 0.78     | 0.93      |
|      |                   | striped skunk         | -0.83     | -0.70    | -0.13    | 0.45     | 0.58      |
|      | virginia opossum  | -0.68                 | -0.54     | 0.02     | 0.54     | 0.64     |           |
|      | white tailed deer | -0.42                 | -0.30     | 0.23     | 0.76     | 0.87     |           |
|      | woodchuck         | -0.12                 | 0.00      | 0.61     | 1.19     | 1.29     |           |
|      | imp               | armadillo             | -7.37     | -6.56    | -3.11    | 0.38     | 1.24      |
|      |                   | bobcat                | -8.08     | -7.44    | -4.68    | -1.83    | -1.18     |
|      |                   | cottontail sp         | -1.62     | -1.22    | 0.57     | 2.36     | 2.72      |
|      |                   | coyote                | -6.27     | -5.73    | -3.40    | -1.35    | -0.96     |
|      |                   | eastern chipmunk      | -3.57     | -3.20    | -1.14    | 0.85     | 1.20      |
|      |                   | elk                   | -10.83    | -9.95    | -5.83    | -1.62    | -0.58     |
|      |                   | flying squirrel sp    | -3.98     | -3.31    | -0.24    | 2.79     | 3.48      |
|      |                   | fox squirrel          | -4.34     | -3.61    | -0.17    | 3.31     | 4.12      |
|      |                   | gray fox              | -3.83     | -3.29    | -0.71    | 2.15     | 2.68      |
|      |                   | gray squirrel sp      | 0.65      | 1.01     | 2.83     | 4.77     | 5.23      |
|      |                   | mule deer             | -9.21     | -8.39    | -4.84    | -1.00    | 0.04      |
|      |                   | north american badger | -8.45     | -7.34    | -2.96    | 1.63     | 2.70      |
|      |                   | north american beaver | -3.23     | -2.27    | 1.49     | 4.67     | 5.37      |
|      |                   | north american mink   | -3.65     | -2.91    | 0.50     | 3.49     | 4.12      |
|      |                   | raccoon               | -0.24     | 0.14     | 2.33     | 4.82     | 5.29      |
|      |                   | red fox               | -2.99     | -2.56    | -0.27    | 1.97     | 2.39      |
|      |                   | red squirrel          | -3.38     | -2.90    | -0.14    | 3.01     | 3.76      |
|      |                   | striped skunk         | -4.00     | -3.38    | -0.74    | 1.73     | 2.22      |
|      |                   | virginia opossum      | -2.28     | -1.92    | -0.14    | 1.64     | 2.01      |
|      |                   | white tailed deer     | -6.95     | -6.49    | -4.19    | -1.71    | -1.20     |
|      |                   | woodchuck             | -1.35     | -0.98    | 1.21     | 3.50     | 3.99      |

**Table S25:** Species and city-specific occupancy parameters. Note that all of these species do not likely reside in this city (that is controlled by another level of the model). (continued)

| City               | Parameter             | Species               | CI(0.025) | CI(0.05) | Estimate | CI(0.95) | CI(0.975) |       |
|--------------------|-----------------------|-----------------------|-----------|----------|----------|----------|-----------|-------|
| Sanford, FL        | gent X imp            | armadillo             | -6.42     | -5.45    | -2.05    | 1.32     | 2.39      |       |
|                    |                       | bobcat                | -4.11     | -3.36    | -0.47    | 2.51     | 3.30      |       |
|                    |                       | cottontail sp         | -3.17     | -2.76    | -0.91    | 0.97     | 1.40      |       |
|                    |                       | coyote                | -4.81     | -4.29    | -1.88    | 0.32     | 0.79      |       |
|                    |                       | eastern chipmunk      | -4.72     | -4.20    | -1.76    | 0.53     | 1.00      |       |
|                    |                       | elk                   | -4.82     | -3.99    | -1.04    | 2.11     | 2.95      |       |
|                    |                       | flying squirrel sp    | -5.06     | -4.34    | -1.32    | 1.50     | 2.11      |       |
|                    |                       | fox squirrel          | -3.93     | -3.28    | -0.59    | 2.02     | 2.58      |       |
|                    |                       | gray fox              | -3.28     | -2.62    | 0.13     | 2.74     | 3.26      |       |
|                    |                       | gray squirrel sp      | -3.48     | -3.07    | -0.95    | 1.65     | 2.29      |       |
|                    |                       | mule deer             | -5.06     | -4.28    | -1.35    | 1.66     | 2.48      |       |
|                    |                       | north american badger | -5.19     | -4.40    | -1.42    | 1.61     | 2.40      |       |
|                    |                       | north american beaver | -5.01     | -4.23    | -1.28    | 1.52     | 2.17      |       |
|                    |                       | north american mink   | -5.15     | -4.45    | -1.39    | 1.39     | 1.97      |       |
|                    |                       | raccoon               | -4.72     | -4.04    | -0.99    | 2.44     | 3.31      |       |
|                    |                       | red fox               | -4.61     | -4.08    | -1.70    | 0.69     | 1.24      |       |
|                    |                       | red squirrel          | -5.07     | -4.40    | -1.47    | 1.52     | 2.26      |       |
|                    |                       | striped skunk         | -5.35     | -4.55    | -1.53    | 1.38     | 2.05      |       |
|                    |                       | virginia opossum      | -2.92     | -2.51    | -0.50    | 1.67     | 2.12      |       |
|                    |                       | white tailed deer     | -4.22     | -3.62    | -1.15    | 1.21     | 1.74      |       |
|                    |                       | woodchuck             | -5.30     | -4.62    | -1.79    | 0.63     | 1.10      |       |
|                    |                       | intercept             | armadillo | -2.02    | -1.93    | -1.49    | -1.08     | -1.00 |
|                    |                       |                       | bobcat    | -2.89    | -2.75    | -2.05    | -1.30     | -1.13 |
|                    | cottontail sp         |                       | -2.55     | -2.46    | -1.97    | -1.52    | -1.43     |       |
|                    | coyote                |                       | -1.77     | -1.68    | -1.24    | -0.79    | -0.69     |       |
|                    | eastern chipmunk      |                       | -5.31     | -4.84    | -2.76    | -0.96    | -0.60     |       |
|                    | elk                   |                       | -6.48     | -5.97    | -3.78    | -1.54    | -1.02     |       |
|                    | flying squirrel sp    |                       | -4.72     | -4.49    | -3.30    | -2.06    | -1.81     |       |
|                    | fox squirrel          |                       | -7.26     | -6.47    | -1.95    | 1.33     | 2.04      |       |
|                    | gray fox              |                       | -6.17     | -5.78    | -4.07    | -2.57    | -2.27     |       |
|                    | gray squirrel sp      |                       | -0.31     | -0.24    | 0.11     | 0.47     | 0.55      |       |
|                    | mule deer             |                       | -5.79     | -5.12    | -2.01    | 1.04     | 1.73      |       |
|                    | north american badger |                       | -7.90     | -7.34    | -4.92    | -2.69    | -2.20     |       |
|                    | north american beaver |                       | -7.02     | -6.54    | -4.46    | -2.45    | -2.02     |       |
|                    | north american mink   |                       | -6.30     | -5.75    | -3.31    | -1.14    | -0.74     |       |
|                    | raccoon               |                       | -1.42     | -1.34    | -0.97    | -0.61    | -0.54     |       |
|                    | red fox               |                       | -4.97     | -4.72    | -3.69    | -2.87    | -2.72     |       |
|                    | red squirrel          |                       | -7.40     | -6.47    | -3.34    | -0.87    | -0.31     |       |
|                    | striped skunk         |                       | -5.06     | -4.70    | -2.74    | -0.92    | -0.59     |       |
|                    | virginia opossum      |                       | -2.10     | -2.01    | -1.58    | -1.18    | -1.11     |       |
|                    | white tailed deer     |                       | -2.27     | -2.17    | -1.64    | -1.16    | -1.07     |       |
|                    | woodchuck             | -4.79                 | -4.38     | -2.55    | -0.75    | -0.35    |           |       |
|                    | gent                  | armadillo             | -0.85     | -0.73    | -0.18    | 0.39     | 0.50      |       |
| bobcat             |                       | -0.82                 | -0.69     | -0.05    | 0.53     | 0.66     |           |       |
| cottontail sp      |                       | -0.17                 | -0.08     | 0.35     | 0.82     | 0.91     |           |       |
| coyote             |                       | -0.32                 | -0.23     | 0.21     | 0.70     | 0.82     |           |       |
| eastern chipmunk   |                       | -0.70                 | -0.55     | 0.06     | 0.69     | 0.82     |           |       |
| elk                |                       | -1.42                 | -1.19     | -0.19    | 0.70     | 0.86     |           |       |
| flying squirrel sp |                       | -1.24                 | -1.07     | -0.21    | 0.61     | 0.75     |           |       |

**Table S25:** Species and city-specific occupancy parameters. Note that all of these species do not likely reside in this city (that is controlled by another level of the model). (continued)

| City | Parameter  | Species               | CI(0.025) | CI(0.05) | Estimate | CI(0.95) | CI(0.975) |
|------|------------|-----------------------|-----------|----------|----------|----------|-----------|
|      |            | fox squirrel          | -0.71     | -0.58    | -0.04    | 0.56     | 0.71      |
|      |            | gray fox              | -0.69     | -0.53    | 0.13     | 0.77     | 0.90      |
|      |            | gray squirrel sp      | -0.64     | -0.55    | -0.13    | 0.30     | 0.38      |
|      |            | mule deer             | -0.79     | -0.65    | 0.03     | 0.72     | 0.87      |
|      |            | north american badger | -0.92     | -0.74    | 0.06     | 0.85     | 1.01      |
|      |            | north american beaver | -0.60     | -0.44    | 0.30     | 1.07     | 1.23      |
|      |            | north american mink   | -0.76     | -0.59    | 0.12     | 0.85     | 0.99      |
|      |            | raccoon               | 0.07      | 0.15     | 0.54     | 0.99     | 1.08      |
|      |            | red fox               | -0.40     | -0.29    | 0.23     | 0.78     | 0.90      |
|      |            | red squirrel          | -0.95     | -0.81    | -0.05    | 0.71     | 0.88      |
|      |            | striped skunk         | -0.91     | -0.78    | -0.17    | 0.41     | 0.54      |
|      |            | virginia opossum      | -0.24     | -0.16    | 0.28     | 0.77     | 0.89      |
|      |            | white tailed deer     | -0.22     | -0.12    | 0.37     | 0.93     | 1.05      |
|      |            | woodchuck             | -0.16     | 0.01     | 0.67     | 1.31     | 1.45      |
|      | imp        | armadillo             | -6.11     | -5.62    | -3.27    | -1.02    | -0.54     |
|      |            | bobcat                | -7.66     | -7.12    | -4.57    | -2.01    | -1.43     |
|      |            | cottontail sp         | -1.64     | -1.21    | 0.82     | 2.89     | 3.31      |
|      |            | coyote                | -5.01     | -4.57    | -2.49    | -0.56    | -0.15     |
|      |            | eastern chipmunk      | -5.21     | -4.39    | -1.09    | 1.94     | 2.68      |
|      |            | elk                   | -10.81    | -9.99    | -5.91    | -1.65    | -0.62     |
|      |            | flying squirrel sp    | -4.16     | -3.43    | -0.20    | 2.92     | 3.58      |
|      |            | fox squirrel          | -4.47     | -3.64    | -0.10    | 3.41     | 4.12      |
|      |            | gray fox              | -5.46     | -4.68    | -1.35    | 1.95     | 2.64      |
|      |            | gray squirrel sp      | -0.03     | 0.28     | 1.93     | 3.55     | 3.89      |
|      |            | mule deer             | -9.24     | -8.48    | -4.84    | -1.07    | -0.05     |
|      |            | north american badger | -8.37     | -7.38    | -2.99    | 1.71     | 2.87      |
|      |            | north american beaver | -2.45     | -1.64    | 1.96     | 5.48     | 6.20      |
|      |            | north american mink   | -3.09     | -2.34    | 1.05     | 4.27     | 5.05      |
|      |            | raccoon               | -2.38     | -1.99    | 0.03     | 1.97     | 2.38      |
|      |            | red fox               | -3.21     | -2.54    | 0.73     | 3.94     | 4.54      |
|      |            | red squirrel          | -6.45     | -5.30    | -1.36    | 2.47     | 3.50      |
|      |            | striped skunk         | -3.91     | -3.27    | -0.43    | 2.25     | 2.77      |
|      |            | virginia opossum      | -3.37     | -2.95    | -0.98    | 0.87     | 1.20      |
|      |            | white tailed deer     | -12.48    | -11.73   | -8.31    | -5.63    | -5.13     |
|      |            | woodchuck             | -2.10     | -1.49    | 1.59     | 4.67     | 5.40      |
|      | gent X imp | armadillo             | -5.66     | -5.05    | -2.22    | 0.41     | 0.94      |
|      |            | bobcat                | -2.63     | -2.16    | 0.34     | 3.63     | 4.54      |
|      |            | cottontail sp         | -2.81     | -2.43    | -0.51    | 1.65     | 2.19      |
|      |            | coyote                | -3.95     | -3.49    | -1.45    | 0.68     | 1.13      |
|      |            | eastern chipmunk      | -4.80     | -4.17    | -1.43    | 1.34     | 2.04      |
|      |            | elk                   | -4.86     | -4.15    | -1.08    | 2.02     | 2.73      |
|      |            | flying squirrel sp    | -4.71     | -4.02    | -1.18    | 1.79     | 2.47      |
|      |            | fox squirrel          | -3.79     | -3.20    | -0.57    | 2.12     | 2.76      |
|      |            | gray fox              | -3.74     | -2.99    | 0.07     | 2.90     | 3.55      |
|      |            | gray squirrel sp      | -4.89     | -4.43    | -2.35    | -0.48    | -0.14     |
|      |            | mule deer             | -5.22     | -4.44    | -1.32    | 1.70     | 2.56      |
|      |            | north american badger | -5.12     | -4.43    | -1.40    | 1.59     | 2.36      |
|      |            | north american beaver | -4.92     | -4.14    | -1.16    | 1.76     | 2.45      |
|      |            | north american mink   | -4.81     | -4.09    | -1.20    | 1.73     | 2.42      |

**Table S25:** Species and city-specific occupancy parameters. Note that all of these species do not likely reside in this city (that is controlled by another level of the model). (continued)

| City                  | Parameter             | Species               | CI(0.025) | CI(0.05) | Estimate | CI(0.95) | CI(0.975) |
|-----------------------|-----------------------|-----------------------|-----------|----------|----------|----------|-----------|
| Salt Lake City, UT    | intercept             | raccoon               | -3.77     | -3.32    | -1.01    | 1.40     | 1.92      |
|                       |                       | red fox               | -4.41     | -3.83    | -1.46    | 1.17     | 1.73      |
|                       |                       | red squirrel          | -5.55     | -4.72    | -1.59    | 1.35     | 2.11      |
|                       |                       | striped skunk         | -5.14     | -4.35    | -1.36    | 1.70     | 2.55      |
|                       |                       | virginia opossum      | -3.15     | -2.69    | -0.62    | 1.40     | 1.80      |
|                       |                       | white tailed deer     | -3.55     | -3.09    | -0.73    | 1.79     | 2.40      |
|                       |                       | woodchuck             | -5.18     | -4.22    | -0.90    | 2.30     | 3.17      |
|                       |                       | armadillo             | -4.05     | -3.56    | -1.46    | 0.58     | 1.02      |
|                       |                       | bobcat                | -2.13     | -1.97    | -1.16    | -0.12    | 0.15      |
|                       |                       | cottontail sp         | -3.35     | -3.20    | -2.46    | -1.78    | -1.65     |
|                       |                       | coyote                | -0.90     | -0.82    | -0.38    | 0.06     | 0.15      |
|                       |                       | eastern chipmunk      | -5.06     | -4.66    | -2.72    | -0.94    | -0.58     |
|                       |                       | elk                   | -4.60     | -4.38    | -3.31    | -2.28    | -2.10     |
|                       |                       | flying squirrel sp    | -7.05     | -6.59    | -4.63    | -2.86    | -2.49     |
|                       |                       | fox squirrel          | -5.87     | -5.49    | -3.79    | -2.45    | -2.15     |
|                       |                       | gray fox              | -7.46     | -6.91    | -4.56    | -2.21    | -1.65     |
|                       |                       | gray squirrel sp      | -2.18     | -1.76    | 0.32     | 2.43     | 2.89      |
|                       |                       | mule deer             | 0.35      | 0.42     | 0.83     | 1.25     | 1.34      |
|                       |                       | north american badger | -6.66     | -6.27    | -4.45    | -2.82    | -2.47     |
|                       |                       | north american beaver | -5.05     | -4.82    | -3.65    | -2.68    | -2.49     |
|                       | north american mink   | -6.10                 | -5.57     | -3.23    | -1.14    | -0.72    |           |
|                       | raccoon               | -1.11                 | -1.03     | -0.60    | -0.19    | -0.10    |           |
|                       | red fox               | -2.55                 | -2.40     | -1.69    | -0.95    | -0.79    |           |
|                       | red squirrel          | -2.97                 | -2.81     | -2.12    | -1.52    | -1.41    |           |
|                       | striped skunk         | -1.52                 | -1.44     | -1.00    | -0.58    | -0.50    |           |
|                       | virginia opossum      | -3.51                 | -3.02     | -0.82    | 1.34     | 1.82     |           |
|                       | white tailed deer     | -8.25                 | -7.39     | -2.42    | 2.30     | 3.11     |           |
|                       | woodchuck             | -4.81                 | -4.39     | -2.54    | -0.75    | -0.41    |           |
|                       | gent                  | armadillo             | -1.02     | -0.89    | -0.19    | 0.47     | 0.61      |
|                       | bobcat                | -0.77                 | -0.63     | 0.02     | 0.65     | 0.78     |           |
|                       | cottontail sp         | -0.40                 | -0.28     | 0.25     | 0.73     | 0.84     |           |
|                       | coyote                | -0.59                 | -0.45     | 0.08     | 0.59     | 0.71     |           |
|                       | eastern chipmunk      | -0.69                 | -0.55     | 0.07     | 0.70     | 0.83     |           |
|                       | elk                   | -1.40                 | -1.18     | -0.19    | 0.69     | 0.86     |           |
|                       | flying squirrel sp    | -1.22                 | -1.06     | -0.18    | 0.67     | 0.84     |           |
|                       | fox squirrel          | -0.71                 | -0.59     | -0.04    | 0.55     | 0.69     |           |
|                       | gray fox              | -0.65                 | -0.50     | 0.14     | 0.79     | 0.93     |           |
|                       | gray squirrel sp      | -0.74                 | -0.63     | -0.09    | 0.47     | 0.59     |           |
|                       | mule deer             | -0.55                 | -0.42     | 0.20     | 0.91     | 1.07     |           |
|                       | north american badger | -0.88                 | -0.73     | 0.06     | 0.84     | 0.99     |           |
| north american beaver | -0.54                 | -0.39                 | 0.35      | 1.10     | 1.27     |          |           |
| north american mink   | -0.76                 | -0.61                 | 0.13      | 0.86     | 1.00     |          |           |
| raccoon               | -0.09                 | 0.00                  | 0.48      | 1.04     | 1.17     |          |           |
| red fox               | -0.39                 | -0.27                 | 0.24      | 0.79     | 0.92     |          |           |
| red squirrel          | -0.97                 | -0.81                 | -0.07     | 0.68     | 0.84     |          |           |
| striped skunk         | -0.73                 | -0.63                 | -0.08     | 0.52     | 0.66     |          |           |
| virginia opossum      | -0.60                 | -0.45                 | 0.13      | 0.72     | 0.87     |          |           |
| white tailed deer     | -0.48                 | -0.36                 | 0.23      | 0.79     | 0.93     |          |           |
| woodchuck             | -0.11                 | 0.02                  | 0.66      | 1.31     | 1.43     |          |           |

**Table S25:** Species and city-specific occupancy parameters. Note that all of these species do not likely reside in this city (that is controlled by another level of the model). (continued)

| City               | Parameter             | Species               | CI(0.025) | CI(0.05) | Estimate | CI(0.95) | CI(0.975) |      |
|--------------------|-----------------------|-----------------------|-----------|----------|----------|----------|-----------|------|
| Seattle, WA        | imp                   | armadillo             | -7.21     | -6.46    | -3.12    | 0.43     | 1.17      |      |
|                    |                       | bobcat                | -8.39     | -7.80    | -5.02    | -2.40    | -1.89     |      |
|                    |                       | cottontail sp         | -3.06     | -2.45    | 0.05     | 2.43     | 2.92      |      |
|                    |                       | coyote                | -5.14     | -4.73    | -2.69    | -0.83    | -0.47     |      |
|                    |                       | eastern chipmunk      | -5.17     | -4.39    | -1.15    | 1.91     | 2.57      |      |
|                    |                       | elk                   | -11.25    | -10.29   | -6.15    | -2.21    | -1.43     |      |
|                    |                       | flying squirrel sp    | -4.19     | -3.42    | -0.07    | 3.19     | 3.91      |      |
|                    |                       | fox squirrel          | -2.50     | -1.94    | 1.03     | 4.45     | 5.22      |      |
|                    |                       | gray fox              | -5.54     | -4.83    | -1.43    | 1.91     | 2.65      |      |
|                    |                       | gray squirrel sp      | -0.87     | -0.34    | 2.00     | 4.33     | 4.85      |      |
|                    |                       | mule deer             | -4.57     | -4.22    | -2.21    | -0.04    | 0.40      |      |
|                    |                       | north american badger | -8.74     | -7.65    | -3.27    | 0.93     | 1.79      |      |
|                    |                       | north american beaver | -0.28     | 0.27     | 3.19     | 6.54     | 7.21      |      |
|                    |                       | north american mink   | -2.98     | -2.26    | 1.01     | 4.13     | 4.86      |      |
|                    |                       | raccoon               | -0.03     | 0.34     | 2.17     | 4.17     | 4.56      |      |
|                    |                       | red fox               | 2.10      | 2.55     | 4.91     | 7.53     | 8.06      |      |
|                    |                       | red squirrel          | -8.32     | -6.99    | -2.70    | 0.25     | 0.83      |      |
|                    |                       | striped skunk         | -1.71     | -1.33    | 0.46     | 2.29     | 2.64      |      |
|                    |                       | virginia opossum      | -2.91     | -2.39    | 0.21     | 2.83     | 3.45      |      |
|                    |                       | white tailed deer     | -10.00    | -9.10    | -5.41    | -1.70    | -0.79     |      |
|                    |                       | woodchuck             | -2.24     | -1.57    | 1.56     | 4.64     | 5.30      |      |
|                    |                       | gent X imp            | armadillo | -6.32    | -5.37    | -1.99    | 1.42      | 2.59 |
|                    |                       | bobcat                | -4.24     | -3.48    | -0.57    | 2.24     | 2.89      |      |
|                    |                       | cottontail sp         | -4.12     | -3.57    | -1.32    | 0.79     | 1.21      |      |
|                    | coyote                | -4.59                 | -4.08     | -1.78    | 0.31     | 0.73     |           |      |
|                    | eastern chipmunk      | -4.82                 | -4.14     | -1.41    | 1.33     | 1.93     |           |      |
|                    | elk                   | -4.80                 | -4.02     | -1.06    | 2.01     | 2.68     |           |      |
|                    | flying squirrel sp    | -4.85                 | -4.20     | -1.23    | 1.71     | 2.41     |           |      |
|                    | fox squirrel          | -4.11                 | -3.38     | -0.71    | 1.85     | 2.41     |           |      |
|                    | gray fox              | -3.70                 | -3.01     | 0.09     | 2.97     | 3.62     |           |      |
|                    | gray squirrel sp      | -4.72                 | -4.14     | -1.71    | 0.82     | 1.45     |           |      |
|                    | mule deer             | -3.02                 | -2.55     | -0.28    | 2.69     | 3.32     |           |      |
|                    | north american badger | -5.23                 | -4.51     | -1.48    | 1.54     | 2.24     |           |      |
|                    | north american beaver | -3.98                 | -3.41     | -0.72    | 2.30     | 3.06     |           |      |
|                    | north american mink   | -4.87                 | -4.14     | -1.22    | 1.64     | 2.37     |           |      |
|                    | raccoon               | -2.51                 | -2.06     | 0.52     | 3.80     | 4.55     |           |      |
|                    | red fox               | -3.63                 | -3.22     | -1.10    | 1.35     | 1.86     |           |      |
|                    | red squirrel          | -5.62                 | -4.83     | -1.69    | 1.14     | 1.82     |           |      |
|                    | striped skunk         | -2.63                 | -2.24     | 0.06     | 3.15     | 3.90     |           |      |
|                    | virginia opossum      | -3.75                 | -3.16     | -0.65    | 1.88     | 2.48     |           |      |
|                    | white tailed deer     | -4.28                 | -3.66     | -0.99    | 1.71     | 2.34     |           |      |
|                    | woodchuck             | -5.05                 | -4.21     | -0.88    | 2.43     | 3.30     |           |      |
|                    | intercept             | armadillo             | -4.03     | -3.57    | -1.47    | 0.56     | 1.05      |      |
|                    | bobcat                | -3.27                 | -3.12     | -2.37    | -1.56    | -1.38    |           |      |
|                    | cottontail sp         | -1.53                 | -1.47     | -1.13    | -0.81    | -0.75    |           |      |
|                    | coyote                | -1.03                 | -0.95     | -0.61    | -0.27    | -0.20    |           |      |
| eastern chipmunk   | -4.98                 | -4.56                 | -2.68     | -0.91    | -0.49    |          |           |      |
| elk                | -6.10                 | -5.82                 | -4.59     | -3.54    | -3.33    |          |           |      |
| flying squirrel sp | -6.36                 | -6.04                 | -4.59     | -3.42    | -3.21    |          |           |      |

**Table S25:** Species and city-specific occupancy parameters. Note that all of these species do not likely reside in this city (that is controlled by another level of the model). (continued)

| City | Parameter | Species               | CI(0.025) | CI(0.05) | Estimate | CI(0.95) | CI(0.975) |
|------|-----------|-----------------------|-----------|----------|----------|----------|-----------|
|      |           | fox squirrel          | -6.83     | -5.90    | -1.68    | 1.60     | 2.29      |
|      |           | gray fox              | -7.00     | -6.42    | -3.60    | -1.02    | -0.48     |
|      |           | gray squirrel sp      | -0.24     | -0.17    | 0.20     | 0.58     | 0.65      |
|      |           | mule deer             | -2.80     | -2.69    | -2.14    | -1.65    | -1.56     |
|      |           | north american badger | -8.09     | -7.51    | -5.10    | -2.83    | -2.36     |
|      |           | north american beaver | -7.12     | -6.68    | -4.66    | -2.62    | -2.16     |
|      |           | north american mink   | -6.26     | -5.69    | -3.15    | -1.04    | -0.62     |
|      |           | raccoon               | -0.75     | -0.69    | -0.32    | 0.04     | 0.11      |
|      |           | red fox               | -6.64     | -5.84    | -1.86    | 1.48     | 2.12      |
|      |           | red squirrel          | -7.63     | -6.77    | -3.41    | -0.86    | -0.35     |
|      |           | striped skunk         | -5.21     | -4.96    | -3.80    | -2.65    | -2.40     |
|      |           | virginia opossum      | -2.07     | -2.00    | -1.63    | -1.28    | -1.21     |
|      |           | white tailed deer     | -8.48     | -7.61    | -1.82    | 2.52     | 3.37      |
|      |           | woodchuck             | -4.83     | -4.37    | -2.54    | -0.77    | -0.43     |
|      | gent      | armadillo             | -1.03     | -0.89    | -0.20    | 0.47     | 0.61      |
|      |           | bobcat                | -0.82     | -0.68    | -0.01    | 0.60     | 0.72      |
|      |           | cottontail sp         | -0.38     | -0.28    | 0.17     | 0.58     | 0.66      |
|      |           | coyote                | -0.60     | -0.49    | 0.00     | 0.47     | 0.58      |
|      |           | eastern chipmunk      | -0.70     | -0.56    | 0.07     | 0.69     | 0.82      |
|      |           | elk                   | -1.41     | -1.20    | -0.20    | 0.66     | 0.83      |
|      |           | flying squirrel sp    | -1.24     | -1.06    | -0.19    | 0.63     | 0.81      |
|      |           | fox squirrel          | -0.71     | -0.58    | -0.03    | 0.56     | 0.72      |
|      |           | gray fox              | -0.65     | -0.50    | 0.16     | 0.81     | 0.96      |
|      |           | gray squirrel sp      | -0.84     | -0.72    | -0.23    | 0.22     | 0.30      |
|      |           | mule deer             | -0.91     | -0.77    | -0.07    | 0.54     | 0.67      |
|      |           | north american badger | -0.89     | -0.73    | 0.07     | 0.86     | 1.02      |
|      |           | north american beaver | -0.62     | -0.45    | 0.31     | 1.07     | 1.22      |
|      |           | north american mink   | -0.74     | -0.61    | 0.13     | 0.86     | 1.02      |
|      |           | raccoon               | -0.15     | -0.06    | 0.38     | 0.83     | 0.93      |
|      |           | red fox               | -0.51     | -0.38    | 0.17     | 0.73     | 0.85      |
|      |           | red squirrel          | -0.98     | -0.82    | -0.05    | 0.71     | 0.87      |
|      |           | striped skunk         | -0.81     | -0.69    | -0.11    | 0.48     | 0.62      |
|      |           | virginia opossum      | -0.73     | -0.61    | -0.05    | 0.42     | 0.53      |
|      |           | white tailed deer     | -0.49     | -0.35    | 0.22     | 0.81     | 0.93      |
|      |           | woodchuck             | -0.12     | 0.03     | 0.67     | 1.30     | 1.43      |
|      | imp       | armadillo             | -7.30     | -6.54    | -3.07    | 0.50     | 1.37      |
|      |           | bobcat                | -7.65     | -7.13    | -4.81    | -2.57    | -2.12     |
|      |           | cottontail sp         | 0.06      | 0.30     | 1.55     | 2.84     | 3.13      |
|      |           | coyote                | -2.50     | -2.26    | -0.99    | 0.27     | 0.49      |
|      |           | eastern chipmunk      | -5.12     | -4.35    | -1.11    | 2.02     | 2.74      |
|      |           | elk                   | -10.76    | -10.02   | -6.42    | -3.26    | -2.62     |
|      |           | flying squirrel sp    | -3.27     | -2.67    | 0.29     | 3.55     | 4.27      |
|      |           | fox squirrel          | -4.23     | -3.54    | -0.12    | 3.44     | 4.22      |
|      |           | gray fox              | -5.82     | -5.07    | -1.50    | 2.03     | 2.80      |
|      |           | gray squirrel sp      | 1.16      | 1.38     | 2.60     | 3.84     | 4.09      |
|      |           | mule deer             | -9.50     | -8.97    | -6.81    | -4.96    | -4.61     |
|      |           | north american badger | -8.24     | -7.25    | -2.94    | 1.58     | 2.74      |
|      |           | north american beaver | -2.49     | -1.66    | 1.96     | 5.42     | 6.10      |
|      |           | north american mink   | -3.20     | -2.39    | 1.03     | 4.22     | 4.89      |

**Table S25:** Species and city-specific occupancy parameters. Note that all of these species do not likely reside in this city (that is controlled by another level of the model). (continued)

| City                  | Parameter  | Species               | CI(0.025) | CI(0.05)         | Estimate | CI(0.95) | CI(0.975) |       |       |
|-----------------------|------------|-----------------------|-----------|------------------|----------|----------|-----------|-------|-------|
|                       | gent X imp | raccoon               | 0.41      | 0.66             | 2.10     | 3.54     | 3.82      |       |       |
|                       |            | red fox               | -3.76     | -3.00            | 0.86     | 4.62     | 5.47      |       |       |
|                       |            | red squirrel          | -6.35     | -5.33            | -1.36    | 2.58     | 3.57      |       |       |
|                       |            | striped skunk         | -2.52     | -2.03            | 0.32     | 3.01     | 3.67      |       |       |
|                       |            | virginia opossum      | -3.12     | -2.83            | -1.49    | -0.19    | 0.04      |       |       |
|                       |            | white tailed deer     | -9.98     | -9.14            | -5.39    | -1.66    | -0.77     |       |       |
|                       |            | woodchuck             | -2.27     | -1.55            | 1.53     | 4.66     | 5.37      |       |       |
|                       |            | armadillo             | -6.48     | -5.48            | -2.04    | 1.39     | 2.52      |       |       |
|                       |            | bobcat                | -4.08     | -3.44            | -0.51    | 2.25     | 2.95      |       |       |
|                       |            | cottontail sp         | -3.44     | -3.04            | -1.16    | 0.65     | 1.05      |       |       |
|                       |            | coyote                | -3.38     | -2.98            | -1.08    | 1.06     | 1.56      |       |       |
|                       |            | eastern chipmunk      | -4.70     | -4.08            | -1.41    | 1.32     | 1.98      |       |       |
|                       |            | elk                   | -4.81     | -4.10            | -1.09    | 2.04     | 2.82      |       |       |
|                       |            | flying squirrel sp    | -4.82     | -4.18            | -1.23    | 1.66     | 2.36      |       |       |
|                       |            | fox squirrel          | -3.80     | -3.15            | -0.60    | 2.04     | 2.74      |       |       |
|                       |            | gray fox              | -3.87     | -3.05            | 0.07     | 3.03     | 3.68      |       |       |
|                       |            | gray squirrel sp      | -4.14     | -3.69            | -1.73    | 0.30     | 0.73      |       |       |
|                       |            | mule deer             | -5.18     | -4.42            | -1.42    | 1.53     | 2.27      |       |       |
|                       |            | north american badger | -5.20     | -4.48            | -1.44    | 1.57     | 2.33      |       |       |
|                       |            | north american beaver | -4.78     | -4.13            | -1.17    | 1.78     | 2.49      |       |       |
|                       |            | north american mink   | -5.03     | -4.19            | -1.27    | 1.70     | 2.37      |       |       |
|                       |            | raccoon               | -4.02     | -3.53            | -1.10    | 1.27     | 1.70      |       |       |
|                       |            | red fox               | -4.86     | -4.16            | -1.53    | 1.13     | 1.76      |       |       |
|                       |            | red squirrel          | -5.45     | -4.68            | -1.59    | 1.43     | 2.19      |       |       |
|                       |            | striped skunk         | -3.84     | -3.27            | -0.61    | 3.00     | 3.94      |       |       |
|                       |            | virginia opossum      | -3.14     | -2.69            | -0.55    | 1.60     | 2.07      |       |       |
|                       |            | white tailed deer     | -4.39     | -3.68            | -0.99    | 1.67     | 2.31      |       |       |
|                       |            | woodchuck             | -5.19     | -4.22            | -0.92    | 2.40     | 3.23      |       |       |
|                       |            | Saint Louis, MO       | intercept | armadillo        | -3.95    | -3.82    | -3.19     | -2.68 | -2.58 |
|                       |            |                       |           | bobcat           | -4.79    | -4.56    | -3.37     | -2.05 | -1.77 |
|                       |            |                       |           | cottontail sp    | -1.48    | -1.42    | -1.14     | -0.86 | -0.80 |
|                       |            |                       |           | coyote           | -1.03    | -0.96    | -0.62     | -0.27 | -0.20 |
|                       |            |                       |           | eastern chipmunk | -3.03    | -2.95    | -2.52     | -2.12 | -2.04 |
| elk                   | -6.59      |                       |           | -6.08            | -3.80    | -1.54    | -0.98     |       |       |
| flying squirrel sp    | -5.98      |                       |           | -5.73            | -4.47    | -3.28    | -3.02     |       |       |
| fox squirrel          | -1.84      |                       |           | -1.77            | -1.46    | -1.17    | -1.11     |       |       |
| gray fox              | -3.93      |                       |           | -3.81            | -3.20    | -2.64    | -2.54     |       |       |
| gray squirrel sp      | 1.02       |                       |           | 1.11             | 1.57     | 2.06     | 2.14      |       |       |
| mule deer             | -5.98      |                       |           | -5.21            | -2.00    | 0.98     | 1.66      |       |       |
| north american badger | -8.01      |                       |           | -7.51            | -5.06    | -2.79    | -2.31     |       |       |
| north american beaver | -7.64      |                       |           | -7.22            | -5.41    | -3.94    | -3.65     |       |       |
| north american mink   | -3.79      |                       |           | -3.62            | -2.73    | -1.75    | -1.54     |       |       |
| raccoon               | 0.14       |                       |           | 0.20             | 0.54     | 0.89     | 0.96      |       |       |
| red fox               | -2.30      |                       |           | -2.23            | -1.90    | -1.60    | -1.54     |       |       |
| red squirrel          | -7.48      |                       |           | -6.62            | -3.42    | -0.90    | -0.30     |       |       |
| striped skunk         | -3.42      |                       |           | -3.32            | -2.81    | -2.34    | -2.25     |       |       |
| virginia opossum      | -0.36      |                       |           | -0.31            | -0.02    | 0.26     | 0.31      |       |       |
| white tailed deer     | -0.48      |                       |           | -0.40            | 0.04     | 0.48     | 0.56      |       |       |
| woodchuck             | -3.04      |                       |           | -2.97            | -2.57    | -2.18    | -2.11     |       |       |



**Table S25:** Species and city-specific occupancy parameters. Note that all of these species do not likely reside in this city (that is controlled by another level of the model). (continued)

| City | Parameter             | Species               | CI(0.025)        | CI(0.05) | Estimate | CI(0.95) | CI(0.975) |       |
|------|-----------------------|-----------------------|------------------|----------|----------|----------|-----------|-------|
|      | gent                  | armadillo             | -1.06            | -0.93    | -0.25    | 0.40     | 0.53      |       |
|      |                       | bobcat                | -0.80            | -0.63    | 0.02     | 0.66     | 0.80      |       |
|      |                       | cottontail sp         | -0.30            | -0.21    | 0.20     | 0.58     | 0.67      |       |
|      |                       | coyote                | -0.46            | -0.36    | 0.07     | 0.51     | 0.60      |       |
|      |                       | eastern chipmunk      | -0.58            | -0.47    | 0.08     | 0.62     | 0.74      |       |
|      |                       | elk                   | -1.38            | -1.16    | -0.19    | 0.71     | 0.87      |       |
|      |                       | flying squirrel sp    | -1.13            | -0.97    | -0.13    | 0.72     | 0.89      |       |
|      |                       | fox squirrel          | -0.51            | -0.42    | 0.03     | 0.53     | 0.63      |       |
|      |                       | gray fox              | -0.59            | -0.46    | 0.17     | 0.80     | 0.94      |       |
|      |                       | gray squirrel sp      | -0.70            | -0.59    | -0.10    | 0.40     | 0.51      |       |
|      |                       | mule deer             | -0.81            | -0.65    | 0.03     | 0.71     | 0.85      |       |
|      |                       | north american badger | -0.90            | -0.72    | 0.06     | 0.86     | 1.01      |       |
|      |                       | north american beaver | -0.64            | -0.46    | 0.29     | 1.05     | 1.21      |       |
|      |                       | north american mink   | -0.70            | -0.56    | 0.15     | 0.85     | 1.02      |       |
|      |                       | raccoon               | -0.06            | 0.02     | 0.44     | 0.92     | 1.03      |       |
|      |                       | red fox               | -0.68            | -0.57    | -0.03    | 0.42     | 0.51      |       |
|      |                       | red squirrel          | -0.98            | -0.82    | -0.05    | 0.71     | 0.86      |       |
|      |                       | striped skunk         | -0.97            | -0.83    | -0.23    | 0.32     | 0.42      |       |
|      |                       | virginia opossum      | -0.19            | -0.10    | 0.33     | 0.82     | 0.93      |       |
|      |                       | white tailed deer     | -0.42            | -0.32    | 0.19     | 0.66     | 0.75      |       |
|      |                       | woodchuck             | -0.20            | -0.06    | 0.55     | 1.13     | 1.24      |       |
|      |                       | imp                   | armadillo        | -7.60    | -7.19    | -5.12    | -3.33     | -3.00 |
|      |                       |                       | bobcat           | -7.68    | -7.11    | -4.49    | -1.88     | -1.35 |
|      |                       |                       | cottontail sp    | 2.01     | 2.20     | 3.31     | 4.44      | 4.68  |
|      |                       |                       | coyote           | -4.37    | -3.94    | -2.38    | -1.19     | -0.98 |
|      |                       |                       | eastern chipmunk | -1.92    | -1.65    | -0.19    | 1.25      | 1.57  |
|      | elk                   |                       | -10.82           | -9.94    | -5.83    | -1.57    | -0.55     |       |
|      | flying squirrel sp    |                       | -3.61            | -3.02    | -0.07    | 2.76     | 3.34      |       |
|      | fox squirrel          |                       | -3.19            | -2.98    | -1.87    | -0.78    | -0.57     |       |
|      | gray fox              |                       | -3.25            | -2.88    | -0.87    | 1.08     | 1.46      |       |
|      | gray squirrel sp      |                       | 1.23             | 1.46     | 2.73     | 4.01     | 4.27      |       |
|      | mule deer             |                       | -9.26            | -8.44    | -4.82    | -1.02    | -0.04     |       |
|      | north american badger |                       | -8.27            | -7.29    | -2.95    | 1.60     | 2.88      |       |
|      | north american beaver |                       | -2.32            | -1.59    | 1.82     | 5.08     | 5.82      |       |
|      | north american mink   |                       | -3.77            | -3.18    | -0.49    | 1.88     | 2.32      |       |
|      | raccoon               |                       | -3.49            | -3.29    | -2.19    | -1.16    | -0.93     |       |
|      | red fox               |                       | 0.17             | 0.38     | 1.49     | 2.61     | 2.82      |       |
|      | red squirrel          |                       | -6.41            | -5.40    | -1.34    | 2.48     | 3.50      |       |
|      | striped skunk         |                       | -3.39            | -3.01    | -1.31    | 0.30     | 0.59      |       |
|      | virginia opossum      |                       | -2.34            | -2.17    | -1.26    | -0.39    | -0.22     |       |
|      | white tailed deer     |                       | -12.87           | -12.21   | -9.35    | -7.03    | -6.66     |       |
|      | woodchuck             |                       | -2.02            | -1.72    | -0.23    | 1.23     | 1.50      |       |
|      | gent X imp            |                       | armadillo        | -6.86    | -5.69    | -2.25    | 0.73      | 1.47  |
|      |                       |                       | bobcat           | -4.22    | -3.48    | -0.53    | 2.30      | 2.98  |
|      |                       |                       | cottontail sp    | -2.61    | -2.30    | -0.69    | 1.05      | 1.41  |
|      |                       |                       | coyote           | -4.04    | -3.62    | -1.71    | 0.08      | 0.50  |
|      |                       |                       | eastern chipmunk | -4.12    | -3.66    | -1.40    | 0.85      | 1.39  |
|      |                       | elk                   | -4.90            | -4.18    | -1.07    | 2.11     | 2.81      |       |
|      |                       | flying squirrel sp    | -4.26            | -3.67    | -0.90    | 2.11     | 2.86      |       |

**Table S25:** Species and city-specific occupancy parameters. Note that all of these species do not likely reside in this city (that is controlled by another level of the model). (continued)

| City                  | Parameter             | Species               | CI(0.025) | CI(0.05) | Estimate | CI(0.95) | CI(0.975) |
|-----------------------|-----------------------|-----------------------|-----------|----------|----------|----------|-----------|
| Tacoma, WA            | intercept             | fox squirrel          | -2.06     | -1.70    | 0.36     | 2.72     | 3.21      |
|                       |                       | gray fox              | -2.36     | -1.85    | 0.71     | 3.57     | 4.22      |
|                       |                       | gray squirrel sp      | -4.46     | -3.99    | -1.89    | 0.25     | 0.69      |
|                       |                       | mule deer             | -5.00     | -4.25    | -1.34    | 1.64     | 2.45      |
|                       |                       | north american badger | -5.15     | -4.50    | -1.41    | 1.62     | 2.39      |
|                       |                       | north american beaver | -4.95     | -4.18    | -1.27    | 1.61     | 2.27      |
|                       |                       | north american mink   | -4.19     | -3.62    | -0.99    | 1.82     | 2.48      |
|                       |                       | raccoon               | -5.97     | -5.48    | -3.07    | -1.03    | -0.67     |
|                       |                       | red fox               | -4.06     | -3.62    | -1.63    | 0.30     | 0.74      |
|                       |                       | red squirrel          | -5.51     | -4.73    | -1.57    | 1.49     | 2.27      |
|                       |                       | striped skunk         | -5.64     | -4.80    | -1.66    | 1.13     | 1.79      |
|                       |                       | virginia opossum      | -1.61     | -1.32    | 0.44     | 2.45     | 2.84      |
|                       |                       | white tailed deer     | -4.53     | -3.89    | -1.32    | 1.00     | 1.48      |
|                       |                       | woodchuck             | -3.85     | -3.25    | -0.68    | 2.06     | 2.72      |
|                       |                       | armadillo             | -4.07     | -3.57    | -1.47    | 0.58     | 1.04      |
|                       |                       | bobcat                | -4.95     | -4.73    | -3.72    | -2.72    | -2.53     |
|                       |                       | cottontail sp         | -1.33     | -1.27    | -0.97    | -0.69    | -0.64     |
|                       |                       | coyote                | -0.28     | -0.22    | 0.09     | 0.40     | 0.46      |
|                       |                       | eastern chipmunk      | -4.49     | -4.31    | -3.53    | -2.86    | -2.73     |
|                       |                       | elk                   | -5.35     | -5.13    | -4.01    | -3.00    | -2.80     |
|                       |                       | flying squirrel sp    | -7.21     | -6.76    | -4.80    | -2.86    | -2.43     |
|                       | fox squirrel          | -6.56                 | -6.22     | -4.61    | -3.40    | -3.15    |           |
|                       | gray fox              | -7.06                 | -6.47     | -3.65    | -1.02    | -0.55    |           |
|                       | gray squirrel sp      | 0.09                  | 0.17      | 0.51     | 0.88     | 0.95     |           |
|                       | mule deer             | -0.73                 | -0.66     | -0.28    | 0.09     | 0.16     |           |
|                       | north american badger | -7.99                 | -7.48     | -5.08    | -2.79    | -2.28    |           |
|                       | north american beaver | -7.20                 | -6.74     | -4.68    | -2.63    | -2.22    |           |
|                       | north american mink   | -6.33                 | -5.77     | -3.19    | -1.08    | -0.67    |           |
|                       | raccoon               | 0.09                  | 0.15      | 0.47     | 0.80     | 0.87     |           |
|                       | red fox               | -6.67                 | -5.85     | -1.86    | 1.43     | 2.12     |           |
|                       | red squirrel          | -7.49                 | -6.71     | -3.41    | -0.89    | -0.27    |           |
|                       | striped skunk         | -2.97                 | -2.87     | -2.40    | -1.96    | -1.88    |           |
|                       | virginia opossum      | -0.99                 | -0.93     | -0.62    | -0.32    | -0.27    |           |
|                       | white tailed deer     | -8.59                 | -7.69     | -1.78    | 2.52     | 3.38     |           |
|                       | woodchuck             | -4.84                 | -4.37     | -2.53    | -0.77    | -0.35    |           |
|                       | armadillo             | -1.02                 | -0.88     | -0.20    | 0.47     | 0.61     |           |
|                       | bobcat                | -0.79                 | -0.64     | 0.01     | 0.62     | 0.76     |           |
|                       | cottontail sp         | -0.18                 | -0.10     | 0.28     | 0.66     | 0.73     |           |
|                       | coyote                | -0.52                 | -0.43     | -0.01    | 0.38     | 0.45     |           |
|                       | eastern chipmunk      | -0.79                 | -0.65     | 0.01     | 0.58     | 0.70     |           |
|                       | elk                   | -1.41                 | -1.21     | -0.22    | 0.63     | 0.79     |           |
|                       | flying squirrel sp    | -1.26                 | -1.05     | -0.19    | 0.63     | 0.80     |           |
| fox squirrel          | -0.72                 | -0.60                 | -0.06     | 0.50     | 0.64     |          |           |
| gray fox              | -0.64                 | -0.50                 | 0.15      | 0.79     | 0.93     |          |           |
| gray squirrel sp      | -0.27                 | -0.19                 | 0.25      | 0.84     | 0.96     |          |           |
| mule deer             | -1.03                 | -0.90                 | -0.24     | 0.33     | 0.44     |          |           |
| north american badger | -0.90                 | -0.73                 | 0.07      | 0.85     | 1.00     |          |           |
| north american beaver | -0.62                 | -0.46                 | 0.31      | 1.06     | 1.21     |          |           |
| north american mink   | -0.76                 | -0.60                 | 0.13      | 0.85     | 0.98     |          |           |
|                       | gent                  |                       |           |          |          |          |           |

**Table S25:** Species and city-specific occupancy parameters. Note that all of these species do not likely reside in this city (that is controlled by another level of the model). (continued)

| City | Parameter  | Species               | CI(0.025) | CI(0.05) | Estimate | CI(0.95) | CI(0.975) |
|------|------------|-----------------------|-----------|----------|----------|----------|-----------|
|      | imp        | raccoon               | -0.34     | -0.25    | 0.19     | 0.59     | 0.66      |
|      |            | red fox               | -0.52     | -0.40    | 0.17     | 0.74     | 0.87      |
|      |            | red squirrel          | -0.98     | -0.82    | -0.05    | 0.69     | 0.85      |
|      |            | striped skunk         | -0.92     | -0.79    | -0.22    | 0.30     | 0.40      |
|      |            | virginia opossum      | -0.59     | -0.50    | -0.06    | 0.35     | 0.44      |
|      |            | white tailed deer     | -0.49     | -0.35    | 0.23     | 0.78     | 0.91      |
|      |            | woodchuck             | -0.12     | 0.03     | 0.67     | 1.29     | 1.44      |
|      |            | armadillo             | -7.25     | -6.53    | -3.12    | 0.37     | 1.29      |
|      |            | bobcat                | -7.93     | -7.36    | -5.04    | -2.82    | -2.37     |
|      |            | cottontail sp         | -0.76     | -0.57    | 0.48     | 1.53     | 1.74      |
|      |            | coyote                | -2.29     | -2.08    | -1.01    | 0.02     | 0.24      |
|      |            | eastern chipmunk      | -4.33     | -3.87    | -1.76    | 0.21     | 0.59      |
|      |            | elk                   | -10.20    | -9.60    | -6.76    | -4.08    | -3.51     |
|      |            | flying squirrel sp    | -4.09     | -3.34    | -0.05    | 3.30     | 4.02      |
|      |            | fox squirrel          | -2.73     | -2.15    | 0.62     | 3.90     | 4.66      |
|      |            | gray fox              | -5.78     | -4.94    | -1.42    | 2.00     | 2.74      |
|      |            | gray squirrel sp      | 1.71      | 1.90     | 2.98     | 4.12     | 4.36      |
|      |            | mule deer             | -7.62     | -7.24    | -5.48    | -3.88    | -3.61     |
|      |            | north american badger | -8.18     | -7.19    | -2.97    | 1.57     | 2.58      |
|      |            | north american beaver | -2.62     | -1.68    | 1.97     | 5.43     | 6.12      |
|      |            | north american mink   | -3.13     | -2.33    | 1.00     | 4.18     | 4.97      |
|      |            | raccoon               | -0.96     | -0.74    | 0.37     | 1.49     | 1.72      |
|      |            | red fox               | -3.86     | -2.95    | 0.81     | 4.69     | 5.66      |
|      |            | red squirrel          | -6.61     | -5.42    | -1.36    | 2.50     | 3.37      |
|      |            | striped skunk         | -1.36     | -1.07    | 0.48     | 2.19     | 2.51      |
|      |            | virginia opossum      | -0.27     | -0.09    | 0.91     | 1.96     | 2.18      |
|      |            | white tailed deer     | -9.90     | -9.11    | -5.37    | -1.64    | -0.76     |
|      |            | woodchuck             | -2.27     | -1.56    | 1.55     | 4.67     | 5.38      |
|      | gent X imp | armadillo             | -6.39     | -5.44    | -2.03    | 1.40     | 2.62      |
|      |            | bobcat                | -4.14     | -3.38    | -0.43    | 2.46     | 3.13      |
|      |            | cottontail sp         | -2.78     | -2.45    | -0.76    | 0.99     | 1.36      |
|      |            | coyote                | -4.71     | -4.26    | -2.27    | -0.52    | -0.20     |
|      |            | eastern chipmunk      | -4.66     | -4.07    | -1.44    | 1.22     | 1.88      |
|      |            | elk                   | -4.67     | -3.98    | -0.98    | 2.11     | 2.88      |
|      |            | flying squirrel sp    | -4.81     | -4.21    | -1.23    | 1.66     | 2.32      |
|      |            | fox squirrel          | -3.82     | -3.27    | -0.70    | 1.87     | 2.56      |
|      |            | gray fox              | -3.87     | -3.07    | 0.04     | 2.91     | 3.56      |
|      |            | gray squirrel sp      | -3.26     | -2.89    | -0.90    | 1.54     | 2.14      |
|      |            | mule deer             | -6.66     | -5.66    | -2.37    | 0.05     | 0.48      |
|      |            | north american badger | -5.22     | -4.44    | -1.41    | 1.61     | 2.36      |
|      |            | north american beaver | -4.90     | -4.14    | -1.19    | 1.78     | 2.51      |
|      |            | north american mink   | -4.78     | -4.18    | -1.25    | 1.61     | 2.29      |
|      |            | raccoon               | -1.98     | -1.58    | 0.79     | 3.76     | 4.41      |
|      |            | red fox               | -4.83     | -4.16    | -1.53    | 1.16     | 1.80      |
|      |            | red squirrel          | -5.50     | -4.67    | -1.57    | 1.45     | 2.22      |
|      |            | striped skunk         | -5.29     | -4.47    | -1.47    | 1.41     | 2.06      |
|      |            | virginia opossum      | -4.11     | -3.59    | -1.52    | 0.34     | 0.68      |
|      |            | white tailed deer     | -4.30     | -3.67    | -0.98    | 1.57     | 2.15      |
|      | woodchuck  | -5.09                 | -4.18     | -0.93    | 2.43     | 3.26     |           |

**Table S25:** Species and city-specific occupancy parameters. Note that all of these species do not likely reside in this city (that is controlled by another level of the model). (continued)

| City               | Parameter             | Species               | CI(0.025)     | CI(0.05) | Estimate | CI(0.95) | CI(0.975) |       |
|--------------------|-----------------------|-----------------------|---------------|----------|----------|----------|-----------|-------|
| Urbana, IL         | intercept             | armadillo             | -4.12         | -3.59    | -1.44    | 0.61     | 1.03      |       |
|                    |                       | bobcat                | -4.05         | -3.83    | -2.78    | -1.57    | -1.24     |       |
|                    |                       | cottontail sp         | -0.02         | 0.06     | 0.49     | 0.92     | 1.02      |       |
|                    |                       | coyote                | -0.28         | -0.21    | 0.20     | 0.61     | 0.71      |       |
|                    |                       | eastern chipmunk      | -1.97         | -1.89    | -1.49    | -1.11    | -1.05     |       |
|                    |                       | elk                   | -6.65         | -6.02    | -3.80    | -1.55    | -0.96     |       |
|                    |                       | flying squirrel sp    | -6.12         | -5.82    | -4.37    | -3.13    | -2.89     |       |
|                    |                       | fox squirrel          | -0.54         | -0.46    | -0.05    | 0.36     | 0.44      |       |
|                    |                       | gray fox              | -7.79         | -7.27    | -5.08    | -3.27    | -2.80     |       |
|                    |                       | gray squirrel sp      | 0.47          | 0.57     | 1.04     | 1.55     | 1.67      |       |
|                    |                       | mule deer             | -5.80         | -5.11    | -2.00    | 1.10     | 1.86      |       |
|                    |                       | north american badger | -6.93         | -6.56    | -4.92    | -3.63    | -3.42     |       |
|                    |                       | north american beaver | -5.42         | -5.15    | -3.86    | -2.65    | -2.42     |       |
|                    |                       | north american mink   | -1.78         | -1.70    | -1.28    | -0.87    | -0.80     |       |
|                    |                       | raccoon               | 1.05          | 1.16     | 1.74     | 2.39     | 2.52      |       |
|                    |                       | red fox               | -1.77         | -1.68    | -1.25    | -0.85    | -0.76     |       |
|                    |                       | red squirrel          | -8.22         | -7.47    | -3.99    | -1.19    | -0.60     |       |
|                    |                       | striped skunk         | -1.93         | -1.86    | -1.42    | -1.02    | -0.95     |       |
|                    |                       | virginia opossum      | 0.63          | 0.72     | 1.23     | 1.80     | 1.91      |       |
|                    |                       | white tailed deer     | 0.43          | 0.52     | 1.04     | 1.61     | 1.72      |       |
|                    |                       | woodchuck             | -2.21         | -2.11    | -1.65    | -1.22    | -1.14     |       |
|                    |                       | gent                  | armadillo     | -1.02    | -0.88    | -0.20    | 0.49      | 0.62  |
|                    |                       |                       | bobcat        | -0.76    | -0.61    | 0.04     | 0.68      | 0.82  |
|                    |                       |                       | cottontail sp | -0.29    | -0.18    | 0.30     | 0.82      | 0.92  |
|                    | coyote                |                       | -0.38         | -0.28    | 0.23     | 0.81     | 0.94      |       |
|                    | eastern chipmunk      |                       | -0.51         | -0.39    | 0.21     | 0.87     | 1.02      |       |
|                    | elk                   |                       | -1.39         | -1.19    | -0.19    | 0.68     | 0.86      |       |
|                    | flying squirrel sp    |                       | -1.22         | -1.05    | -0.18    | 0.65     | 0.83      |       |
|                    | fox squirrel          |                       | -0.59         | -0.49    | 0.04     | 0.68     | 0.83      |       |
|                    | gray fox              |                       | -0.62         | -0.49    | 0.16     | 0.79     | 0.94      |       |
|                    | gray squirrel sp      |                       | -0.68         | -0.57    | -0.06    | 0.51     | 0.64      |       |
|                    | mule deer             |                       | -0.80         | -0.64    | 0.03     | 0.72     | 0.86      |       |
|                    | north american badger |                       | -0.91         | -0.75    | 0.06     | 0.86     | 1.02      |       |
|                    | north american beaver |                       | -0.60         | -0.44    | 0.30     | 1.07     | 1.24      |       |
|                    | north american mink   |                       | -0.78         | -0.64    | 0.09     | 0.82     | 0.95      |       |
|                    | raccoon               |                       | -0.18         | -0.07    | 0.42     | 0.96     | 1.08      |       |
|                    | red fox               |                       | -0.34         | -0.23    | 0.28     | 0.86     | 0.98      |       |
|                    | red squirrel          |                       | -0.97         | -0.81    | -0.05    | 0.72     | 0.87      |       |
|                    | striped skunk         |                       | -0.91         | -0.79    | -0.19    | 0.38     | 0.50      |       |
|                    | virginia opossum      |                       | -0.56         | -0.42    | 0.15     | 0.77     | 0.91      |       |
|                    | white tailed deer     |                       | -0.35         | -0.24    | 0.29     | 0.89     | 1.03      |       |
|                    | woodchuck             |                       | -0.01         | 0.12     | 0.73     | 1.36     | 1.50      |       |
|                    | imp                   |                       | armadillo     | -7.23    | -6.43    | -3.11    | 0.35      | 1.22  |
|                    |                       |                       | bobcat        | -7.84    | -7.23    | -4.47    | -1.67     | -1.06 |
|                    |                       | cottontail sp         | -0.76         | -0.36    | 1.73     | 4.04     | 4.62      |       |
|                    |                       | coyote                | -5.21         | -4.84    | -2.93    | -1.19    | -0.85     |       |
|                    |                       | eastern chipmunk      | -2.43         | -2.05    | -0.05    | 2.01     | 2.41      |       |
| elk                |                       | -10.73                | -9.85         | -5.85    | -1.67    | -0.61    |           |       |
| flying squirrel sp |                       | -4.50                 | -3.67         | -0.34    | 2.84     | 3.50     |           |       |

**Table S25:** Species and city-specific occupancy parameters. Note that all of these species do not likely reside in this city (that is controlled by another level of the model). (continued)

| City                  | Parameter  | Species               | CI(0.025) | CI(0.05) | Estimate | CI(0.95) | CI(0.975) |
|-----------------------|------------|-----------------------|-----------|----------|----------|----------|-----------|
| Wilmington, DE        | gent X imp | fox squirrel          | -4.43     | -3.98    | -1.85    | 0.12     | 0.51      |
|                       |            | gray fox              | -5.52     | -4.84    | -1.43    | 2.02     | 2.77      |
|                       |            | gray squirrel sp      | 0.13      | 0.52     | 2.42     | 4.50     | 4.96      |
|                       |            | mule deer             | -9.16     | -8.45    | -4.82    | -0.94    | 0.04      |
|                       |            | north american badger | -8.38     | -7.39    | -3.05    | 1.28     | 2.17      |
|                       |            | north american beaver | -1.59     | -0.84    | 2.44     | 5.70     | 6.40      |
|                       |            | north american mink   | -1.22     | -0.82    | 1.31     | 3.41     | 3.82      |
|                       |            | raccoon               | -2.64     | -2.20    | 0.21     | 2.75     | 3.25      |
|                       |            | red fox               | -0.29     | 0.13     | 2.29     | 4.57     | 5.07      |
|                       |            | red squirrel          | -6.27     | -5.25    | -1.33    | 2.51     | 3.51      |
|                       |            | striped skunk         | -2.55     | -2.13    | -0.24    | 1.65     | 2.02      |
|                       |            | virginia opossum      | -1.34     | -0.90    | 1.17     | 3.46     | 4.02      |
|                       |            | white tailed deer     | -8.07     | -7.65    | -5.37    | -3.16    | -2.72     |
|                       |            | woodchuck             | 1.40      | 1.79     | 3.81     | 6.18     | 6.65      |
|                       |            | armadillo             | -6.31     | -5.45    | -2.06    | 1.32     | 2.24      |
|                       |            | bobcat                | -4.17     | -3.40    | -0.47    | 2.42     | 3.15      |
|                       |            | cottontail sp         | -3.53     | -3.09    | -0.96    | 1.37     | 1.91      |
|                       |            | coyote                | -3.46     | -3.07    | -0.96    | 1.71     | 2.41      |
|                       |            | eastern chipmunk      | -3.56     | -3.03    | -0.62    | 2.60     | 3.46      |
|                       |            | elk                   | -4.86     | -4.05    | -1.02    | 2.05     | 2.81      |
|                       |            | flying squirrel sp    | -4.88     | -4.13    | -1.21    | 1.72     | 2.48      |
|                       |            | fox squirrel          | -2.96     | -2.50    | -0.15    | 2.69     | 3.40      |
|                       |            | gray fox              | -3.78     | -2.99    | 0.09     | 2.89     | 3.53      |
|                       |            | gray squirrel sp      | -4.40     | -3.89    | -1.48    | 1.08     | 1.69      |
|                       |            | mule deer             | -5.17     | -4.41    | -1.32    | 1.68     | 2.48      |
|                       |            | north american badger | -5.16     | -4.39    | -1.42    | 1.61     | 2.30      |
|                       |            | north american beaver | -4.80     | -4.14    | -1.22    | 1.69     | 2.47      |
|                       |            | north american mink   | -5.24     | -4.46    | -1.45    | 1.32     | 1.91      |
|                       |            | raccoon               | -4.83     | -4.11    | -0.93    | 2.70     | 3.60      |
|                       |            | red fox               | -3.65     | -3.21    | -0.84    | 2.04     | 2.80      |
|                       |            | red squirrel          | -5.53     | -4.77    | -1.59    | 1.36     | 2.12      |
|                       |            | striped skunk         | -5.54     | -4.69    | -1.57    | 1.26     | 1.95      |
|                       |            | virginia opossum      | -3.37     | -2.87    | -0.49    | 2.03     | 2.61      |
|                       |            | white tailed deer     | -3.48     | -2.96    | -0.54    | 2.31     | 3.15      |
|                       |            | woodchuck             | -3.72     | -3.09    | -0.29    | 3.17     | 4.08      |
|                       |            | armadillo             | -4.08     | -3.57    | -1.46    | 0.59     | 1.05      |
|                       |            | bobcat                | -5.00     | -4.52    | -2.51    | -0.65    | -0.26     |
|                       |            | cottontail sp         | -1.26     | -1.20    | -0.86    | -0.54    | -0.48     |
|                       |            | coyote                | -3.15     | -3.02    | -2.35    | -1.65    | -1.50     |
|                       |            | eastern chipmunk      | -3.84     | -3.69    | -3.01    | -2.42    | -2.31     |
|                       |            | elk                   | -6.52     | -6.02    | -3.78    | -1.59    | -1.02     |
|                       |            | flying squirrel sp    | -5.43     | -5.19    | -4.15    | -3.29    | -3.14     |
|                       |            | fox squirrel          | -7.61     | -6.62    | -1.84    | 1.47     | 2.21      |
|                       |            | gray fox              | -7.52     | -6.99    | -4.29    | -1.29    | -0.68     |
|                       |            | gray squirrel sp      | 0.61      | 0.69     | 1.15     | 1.65     | 1.77      |
| mule deer             | -5.89      | -5.13                 | -2.03     | 1.01     | 1.65     |          |           |
| north american badger | -7.98      | -7.41                 | -4.99     | -2.73    | -2.25    |          |           |
| north american beaver | -3.78      | -3.63                 | -2.92     | -2.26    | -2.13    |          |           |
| north american mink   | -2.80      | -2.68                 | -2.04     | -1.41    | -1.28    |          |           |

**Table S25:** Species and city-specific occupancy parameters. Note that all of these species do not likely reside in this city (that is controlled by another level of the model). (continued)

| City | Parameter         | Species               | CI(0.025)        | CI(0.05) | Estimate | CI(0.95) | CI(0.975) |      |
|------|-------------------|-----------------------|------------------|----------|----------|----------|-----------|------|
| gent |                   | raccoon               | 1.08             | 1.18     | 1.70     | 2.28     | 2.39      |      |
|      |                   | red fox               | 1.42             | 1.54     | 2.13     | 2.80     | 2.93      |      |
|      |                   | red squirrel          | -5.84            | -5.56    | -4.40    | -3.52    | -3.37     |      |
|      |                   | striped skunk         | -2.11            | -2.02    | -1.53    | -1.04    | -0.93     |      |
|      |                   | virginia opossum      | -0.44            | -0.37    | 0.00     | 0.39     | 0.47      |      |
|      |                   | white tailed deer     | 0.63             | 0.73     | 1.29     | 1.91     | 2.02      |      |
|      |                   | woodchuck             | -1.98            | -1.90    | -1.50    | -1.10    | -1.02     |      |
|      |                   | armadillo             | -1.01            | -0.87    | -0.20    | 0.48     | 0.61      |      |
|      |                   | bobcat                | -0.75            | -0.60    | 0.04     | 0.67     | 0.81      |      |
|      |                   | cottontail sp         | -0.07            | 0.00     | 0.36     | 0.74     | 0.82      |      |
|      |                   | coyote                | -0.80            | -0.65    | -0.07    | 0.42     | 0.53      |      |
|      |                   | eastern chipmunk      | -0.93            | -0.77    | -0.10    | 0.47     | 0.58      |      |
|      |                   | elk                   | -1.39            | -1.18    | -0.19    | 0.71     | 0.88      |      |
|      |                   | flying squirrel sp    | -1.18            | -0.98    | -0.15    | 0.68     | 0.85      |      |
|      |                   | fox squirrel          | -0.71            | -0.58    | -0.03    | 0.57     | 0.71      |      |
|      |                   | gray fox              | -0.66            | -0.52    | 0.14     | 0.80     | 0.95      |      |
|      |                   | gray squirrel sp      | -1.00            | -0.88    | -0.38    | 0.05     | 0.13      |      |
|      |                   | mule deer             | -0.80            | -0.64    | 0.03     | 0.71     | 0.87      |      |
|      |                   | north american badger | -0.92            | -0.74    | 0.06     | 0.83     | 0.99      |      |
|      |                   | north american beaver | -0.30            | -0.18    | 0.47     | 1.17     | 1.32      |      |
|      |                   | north american mink   | -0.66            | -0.52    | 0.15     | 0.81     | 0.96      |      |
|      | imp               |                       | raccoon          | -0.19    | -0.09    | 0.36     | 0.83      | 0.92 |
|      |                   |                       | red fox          | -0.52    | -0.42    | 0.10     | 0.57      | 0.66 |
|      |                   |                       | red squirrel     | -1.04    | -0.88    | -0.12    | 0.59      | 0.74 |
|      |                   |                       | striped skunk    | -1.02    | -0.90    | -0.36    | 0.12      | 0.20 |
|      |                   |                       | virginia opossum | -0.91    | -0.81    | -0.29    | 0.13      | 0.20 |
|      |                   | white tailed deer     | -0.40            | -0.29    | 0.21     | 0.70     | 0.80      |      |
|      |                   | woodchuck             | 0.11             | 0.21     | 0.69     | 1.14     | 1.22      |      |
|      |                   | armadillo             | -7.15            | -6.39    | -3.08    | 0.47     | 1.25      |      |
|      |                   | bobcat                | -8.10            | -7.51    | -4.71    | -1.77    | -1.14     |      |
|      |                   | cottontail sp         | -2.35            | -2.03    | -0.42    | 1.20     | 1.53      |      |
|      |                   | coyote                | -5.68            | -5.14    | -2.71    | -0.50    | -0.05     |      |
|      |                   | eastern chipmunk      | -8.67            | -7.82    | -4.03    | -1.40    | -0.96     |      |
|      |                   | elk                   | -10.80           | -9.95    | -5.88    | -1.60    | -0.50     |      |
|      |                   | flying squirrel sp    | -4.26            | -3.63    | -0.44    | 2.60     | 3.24      |      |
|      |                   | fox squirrel          | -4.31            | -3.55    | -0.18    | 3.40     | 4.22      |      |
|      |                   | gray fox              | -5.75            | -4.97    | -1.46    | 1.97     | 2.69      |      |
|      |                   | gray squirrel sp      | -0.62            | -0.27    | 1.52     | 3.17     | 3.50      |      |
|      |                   | mule deer             | -9.25            | -8.42    | -4.85    | -1.06    | -0.10     |      |
|      |                   | north american badger | -8.17            | -7.31    | -2.96    | 1.54     | 2.84      |      |
|      |                   | north american beaver | -1.57            | -1.05    | 1.81     | 4.63     | 5.22      |      |
|      |                   | north american mink   | -0.87            | -0.39    | 2.11     | 5.14     | 5.83      |      |
|      |                   | raccoon               | -2.46            | -2.05    | 0.06     | 2.17     | 2.60      |      |
|      |                   | red fox               | -4.05            | -3.55    | -1.13    | 1.10     | 1.51      |      |
|      |                   | red squirrel          | -7.54            | -6.43    | -2.33    | 0.71     | 1.34      |      |
|      |                   | striped skunk         | -2.96            | -2.52    | -0.24    | 1.93     | 2.39      |      |
|      |                   | virginia opossum      | -0.50            | -0.20    | 1.38     | 3.02     | 3.38      |      |
|      | white tailed deer | -9.39                 | -8.84            | -6.33    | -3.94    | -3.49    |           |      |
|      | woodchuck         | -1.17                 | -0.81            | 1.08     | 2.97     | 3.38     |           |      |

**Table S25:** Species and city-specific occupancy parameters. Note that all of these species do not likely reside in this city (that is controlled by another level of the model). (*continued*)

| City | Parameter  | Species               | CI(0.025) | CI(0.05) | Estimate | CI(0.95) | CI(0.975) |
|------|------------|-----------------------|-----------|----------|----------|----------|-----------|
|      | gent X imp | armadillo             | -6.44     | -5.48    | -2.05    | 1.34     | 2.56      |
|      |            | bobcat                | -4.20     | -3.43    | -0.50    | 2.40     | 3.19      |
|      |            | cottontail sp         | -5.24     | -4.75    | -2.50    | -0.74    | -0.41     |
|      |            | coyote                | -4.72     | -4.15    | -1.81    | 0.46     | 0.94      |
|      |            | eastern chipmunk      | -4.82     | -4.22    | -1.46    | 1.15     | 1.73      |
|      |            | elk                   | -4.84     | -4.07    | -1.07    | 1.94     | 2.79      |
|      |            | flying squirrel sp    | -4.71     | -3.99    | -1.14    | 1.79     | 2.60      |
|      |            | fox squirrel          | -3.84     | -3.22    | -0.58    | 2.07     | 2.74      |
|      |            | gray fox              | -3.74     | -2.92    | 0.06     | 2.93     | 3.58      |
|      |            | gray squirrel sp      | -3.55     | -3.15    | -1.20    | 1.10     | 1.59      |
|      |            | mule deer             | -5.26     | -4.49    | -1.38    | 1.63     | 2.40      |
|      |            | north american badger | -5.19     | -4.47    | -1.42    | 1.54     | 2.35      |
|      |            | north american beaver | -6.03     | -5.14    | -2.04    | 0.45     | 0.93      |
|      |            | north american mink   | -6.34     | -5.35    | -1.94    | 0.77     | 1.32      |
|      |            | raccoon               | -6.89     | -6.19    | -2.93    | -0.45    | -0.02     |
|      |            | red fox               | -4.80     | -4.19    | -1.84    | 0.40     | 0.83      |
|      |            | red squirrel          | -5.70     | -4.93    | -1.73    | 1.18     | 1.85      |
|      |            | striped skunk         | -6.48     | -5.69    | -2.53    | -0.20    | 0.24      |
|      |            | virginia opossum      | -2.43     | -2.06    | -0.17    | 1.76     | 2.17      |
|      |            | white tailed deer     | -4.84     | -4.27    | -1.72    | 0.46     | 0.87      |
|      |            | woodchuck             | -5.97     | -5.29    | -2.33    | -0.01    | 0.43      |

**Table S26:** Species-specific estimates for the first-order autologistic term included in the occupancy model to account for repeat sampling at sites. These estimates are among-city averages.

| Species               | CI(0.025) | CI(0.05) | Estimate | CI(0.95) | CI(0.975) |
|-----------------------|-----------|----------|----------|----------|-----------|
| armadillo             | 1.07      | 1.16     | 1.61     | 2.07     | 2.17      |
| bobcat                | 1.40      | 1.50     | 1.96     | 2.44     | 2.54      |
| cottontail sp         | 1.36      | 1.41     | 1.67     | 1.93     | 1.98      |
| coyote                | 0.95      | 1.00     | 1.26     | 1.54     | 1.59      |
| eastern chipmunk      | 1.20      | 1.27     | 1.65     | 2.03     | 2.10      |
| elk                   | 1.45      | 1.58     | 2.32     | 3.17     | 3.36      |
| flying squirrel sp    | 0.46      | 0.66     | 1.57     | 2.40     | 2.56      |
| fox squirrel          | 0.95      | 1.02     | 1.42     | 1.87     | 1.96      |
| gray fox              | 1.79      | 1.87     | 2.34     | 2.82     | 2.92      |
| gray squirrel sp      | 1.01      | 1.06     | 1.32     | 1.58     | 1.63      |
| mule deer             | 1.56      | 1.65     | 2.13     | 2.60     | 2.69      |
| north american badger | 1.08      | 1.23     | 2.02     | 2.83     | 2.99      |
| north american beaver | 1.13      | 1.27     | 2.00     | 2.80     | 2.97      |
| north american mink   | 1.18      | 1.29     | 1.88     | 2.50     | 2.61      |
| raccoon               | 0.91      | 0.96     | 1.19     | 1.41     | 1.46      |
| red fox               | 0.92      | 0.98     | 1.32     | 1.69     | 1.76      |
| red squirrel          | 1.42      | 1.56     | 2.19     | 2.87     | 3.00      |
| striped skunk         | 1.65      | 1.72     | 2.08     | 2.45     | 2.52      |
| virginia opossum      | 1.04      | 1.09     | 1.35     | 1.62     | 1.67      |
| white tailed deer     | 1.70      | 1.77     | 2.08     | 2.40     | 2.47      |
| woodchuck             | 1.13      | 1.22     | 1.67     | 2.11     | 2.20      |



**Table S27:** Community average and the estimated species-level variability (standard deviation) around this average for the autologistic term included in the occupancy model to account for repeat sampling at sites.

| Parameter          | CI(0.025) | CI(0.05) | Estimate | CI(0.95) | CI(0.975) |
|--------------------|-----------|----------|----------|----------|-----------|
| Community average  | 1.47      | 1.51     | 1.75     | 2.00     | 2.05      |
| Standard deviation | 1.50      | 1.73     | 3.34     | 5.92     | 6.58      |

**Table S28:** Estimated hyperparameters for the Gamma distributions that informed species and city-specific variability around a species among-city mean with respect to their autologistic parameter in the occupancy model.

| Parameter | CI(0.025) | CI(0.05) | Estimate | CI(0.95) | CI(0.975) |
|-----------|-----------|----------|----------|----------|-----------|
| Shape     | 2.57      | 3.13     | 7.20     | 9.76     | 9.89      |
| Rate      | 0.68      | 0.88     | 2.25     | 3.83     | 4.16      |

**Table S29:** Estimated species level variability (standard deviation) of each species city-level estimate from their among-city averages for their autologistic parameter in the occupancy model.

| Species               | CI(0.025) | CI(0.05) | Estimate | CI(0.95) | CI(0.975) |
|-----------------------|-----------|----------|----------|----------|-----------|
| armadillo             | 1.36      | 1.62     | 3.25     | 6.34     | 7.31      |
| bobcat                | 1.34      | 1.58     | 3.26     | 6.57     | 7.73      |
| cottontail sp         | 1.35      | 1.50     | 2.63     | 4.49     | 4.98      |
| coyote                | 1.56      | 1.78     | 3.25     | 5.89     | 6.64      |
| eastern chipmunk      | 1.39      | 1.60     | 3.15     | 6.21     | 7.08      |
| elk                   | 0.95      | 1.15     | 2.79     | 5.89     | 6.81      |
| flying squirrel sp    | 1.08      | 1.30     | 2.96     | 6.20     | 7.24      |
| fox squirrel          | 0.58      | 0.70     | 1.73     | 3.74     | 4.30      |
| gray fox              | 1.02      | 1.25     | 2.84     | 5.83     | 6.68      |
| gray squirrel sp      | 1.57      | 1.75     | 3.16     | 5.74     | 6.47      |
| mule deer             | 1.28      | 1.48     | 3.12     | 6.15     | 7.12      |
| north american badger | 1.02      | 1.25     | 2.87     | 5.95     | 6.81      |
| north american beaver | 0.89      | 1.09     | 2.73     | 5.76     | 6.67      |
| north american mink   | 0.91      | 1.10     | 2.60     | 5.46     | 6.40      |
| raccoon               | 2.04      | 2.26     | 4.00     | 7.19     | 8.10      |
| red fox               | 1.26      | 1.44     | 2.82     | 5.32     | 6.08      |
| red squirrel          | 1.19      | 1.42     | 3.11     | 6.35     | 7.41      |
| striped skunk         | 1.45      | 1.69     | 3.32     | 6.48     | 7.44      |
| virginia opossum      | 1.58      | 1.78     | 3.13     | 5.50     | 6.10      |
| white tailed deer     | 1.37      | 1.56     | 3.03     | 5.70     | 6.54      |
| woodchuck             | 1.06      | 1.24     | 2.66     | 5.45     | 6.22      |

**Table S30:** Species and city-specific autologistic parameters for the occupancy model. Note that all of these species do not likely reside in this city (that is controlled by another level of the model).

| City              | Species               | CI(0.025) | CI(0.05) | Estimate | CI(0.95) | CI(0.975) |
|-------------------|-----------------------|-----------|----------|----------|----------|-----------|
| Athens, GA        | armadillo             | 0.60      | 0.73     | 1.41     | 2.12     | 2.24      |
|                   | bobcat                | 0.69      | 0.91     | 1.89     | 2.89     | 3.12      |
|                   | cottontail sp         | 0.87      | 1.01     | 1.73     | 2.46     | 2.61      |
|                   | coyote                | 0.62      | 0.75     | 1.41     | 2.08     | 2.22      |
|                   | eastern chipmunk      | 0.43      | 0.65     | 1.66     | 2.69     | 2.94      |
|                   | elk                   | 0.72      | 1.01     | 2.33     | 3.67     | 4.00      |
|                   | flying squirrel sp    | -0.12     | 0.18     | 1.55     | 2.89     | 3.13      |
|                   | fox squirrel          | -0.27     | 0.02     | 1.41     | 2.85     | 3.22      |
|                   | gray fox              | 1.15      | 1.29     | 2.11     | 2.95     | 3.13      |
|                   | gray squirrel sp      | -0.14     | 0.00     | 0.68     | 1.33     | 1.46      |
|                   | mule deer             | 0.77      | 1.02     | 2.14     | 3.19     | 3.45      |
|                   | north american badger | 0.42      | 0.72     | 2.04     | 3.33     | 3.62      |
|                   | north american beaver | 0.38      | 0.68     | 2.00     | 3.34     | 3.63      |
|                   | north american mink   | 0.39      | 0.65     | 1.87     | 3.10     | 3.37      |
|                   | raccoon               | 0.14      | 0.27     | 0.86     | 1.44     | 1.57      |
|                   | red fox               | 0.40      | 0.56     | 1.42     | 2.35     | 2.55      |
|                   | red squirrel          | 0.76      | 1.00     | 2.20     | 3.38     | 3.62      |
|                   | striped skunk         | 1.04      | 1.22     | 2.16     | 3.13     | 3.34      |
|                   | virginia opossum      | -0.05     | 0.08     | 0.72     | 1.33     | 1.46      |
|                   | white tailed deer     | 1.18      | 1.35     | 2.27     | 3.29     | 3.49      |
| Bay Area, CA      | woodchuck             | 0.30      | 0.56     | 1.66     | 2.83     | 3.09      |
|                   | armadillo             | 0.32      | 0.58     | 1.61     | 2.65     | 2.87      |
|                   | bobcat                | 1.34      | 1.49     | 2.28     | 3.13     | 3.31      |
|                   | cottontail sp         | 1.36      | 1.49     | 2.18     | 2.92     | 3.07      |
|                   | coyote                | 0.93      | 1.00     | 1.41     | 1.83     | 1.92      |
|                   | eastern chipmunk      | 0.44      | 0.64     | 1.65     | 2.66     | 2.89      |
|                   | elk                   | 0.71      | 0.99     | 2.35     | 3.66     | 3.93      |
|                   | flying squirrel sp    | -0.08     | 0.18     | 1.56     | 2.87     | 3.13      |
|                   | fox squirrel          | 1.77      | 1.96     | 3.18     | 4.73     | 5.06      |
|                   | gray fox              | 1.83      | 1.98     | 2.86     | 3.82     | 4.01      |
|                   | gray squirrel sp      | 1.11      | 1.20     | 1.66     | 2.13     | 2.22      |
|                   | mule deer             | 0.80      | 1.06     | 2.14     | 3.19     | 3.42      |
|                   | north american badger | 0.43      | 0.71     | 2.04     | 3.32     | 3.57      |
|                   | north american beaver | 0.38      | 0.69     | 2.03     | 3.34     | 3.63      |
|                   | north american mink   | 0.38      | 0.64     | 1.87     | 3.11     | 3.41      |
|                   | raccoon               | 0.73      | 0.82     | 1.23     | 1.64     | 1.72      |
|                   | red fox               | 0.00      | 0.20     | 1.27     | 2.31     | 2.50      |
|                   | red squirrel          | 0.76      | 1.00     | 2.22     | 3.39     | 3.61      |
|                   | striped skunk         | 0.83      | 0.94     | 1.50     | 2.04     | 2.15      |
|                   | virginia opossum      | 1.45      | 1.56     | 2.17     | 2.81     | 2.94      |
| white tailed deer | 1.50                  | 1.62      | 2.22     | 2.86     | 2.98     |           |
| Boston, MA        | woodchuck             | 0.26      | 0.51     | 1.66     | 2.82     | 3.06      |
|                   | armadillo             | 0.34      | 0.56     | 1.61     | 2.68     | 2.91      |
|                   | bobcat                | 0.67      | 0.89     | 1.96     | 3.03     | 3.27      |
|                   | cottontail sp         | 0.53      | 0.66     | 1.29     | 1.93     | 2.06      |
|                   | coyote                | 0.25      | 0.37     | 1.03     | 1.68     | 1.82      |
|                   | eastern chipmunk      | 1.16      | 1.29     | 2.05     | 2.89     | 3.05      |
|                   | elk                   | 0.71      | 1.01     | 2.34     | 3.65     | 3.91      |
|                   | flying squirrel sp    | -0.11     | 0.21     | 1.56     | 2.89     | 3.15      |

**Table S30:** Species and city-specific autologistic parameters for the occupancy model. Note that all of these species do not likely reside in this city (that is controlled by another level of the model). (*continued*)

| City              | Species               | CI(0.025) | CI(0.05) | Estimate | CI(0.95) | CI(0.975) |
|-------------------|-----------------------|-----------|----------|----------|----------|-----------|
| Chicago, IL       | fox squirrel          | -0.29     | 0.01     | 1.41     | 2.87     | 3.21      |
|                   | gray fox              | 0.92      | 1.16     | 2.25     | 3.33     | 3.56      |
|                   | gray squirrel sp      | 0.94      | 1.07     | 1.76     | 2.51     | 2.67      |
|                   | mule deer             | 0.81      | 1.03     | 2.13     | 3.19     | 3.44      |
|                   | north american badger | 0.43      | 0.72     | 2.03     | 3.30     | 3.60      |
|                   | north american beaver | 0.40      | 0.68     | 2.02     | 3.34     | 3.61      |
|                   | north american mink   | 0.34      | 0.62     | 1.85     | 3.06     | 3.31      |
|                   | raccoon               | 0.31      | 0.43     | 1.04     | 1.66     | 1.78      |
|                   | red fox               | 0.12      | 0.31     | 1.24     | 2.16     | 2.35      |
|                   | red squirrel          | 0.97      | 1.18     | 2.25     | 3.32     | 3.53      |
|                   | striped skunk         | 0.57      | 0.79     | 1.82     | 2.78     | 2.99      |
|                   | virginia opossum      | 0.70      | 0.85     | 1.60     | 2.39     | 2.55      |
|                   | white tailed deer     | 1.48      | 1.61     | 2.31     | 3.08     | 3.25      |
|                   | woodchuck             | 0.21      | 0.45     | 1.57     | 2.64     | 2.87      |
|                   | armadillo             | 0.31      | 0.57     | 1.60     | 2.65     | 2.89      |
|                   | bobcat                | 0.68      | 0.91     | 1.96     | 3.03     | 3.24      |
|                   | cottontail sp         | 0.77      | 0.82     | 1.12     | 1.44     | 1.50      |
|                   | coyote                | 0.74      | 0.80     | 1.13     | 1.46     | 1.53      |
|                   | eastern chipmunk      | 0.54      | 0.68     | 1.37     | 2.00     | 2.12      |
|                   | elk                   | 0.75      | 1.03     | 2.34     | 3.65     | 3.96      |
|                   | flying squirrel sp    | 0.17      | 0.42     | 1.68     | 2.92     | 3.15      |
|                   | fox squirrel          | 0.65      | 0.72     | 1.06     | 1.40     | 1.47      |
|                   | gray fox              | 0.91      | 1.18     | 2.30     | 3.41     | 3.65      |
|                   | gray squirrel sp      | 0.49      | 0.55     | 0.83     | 1.12     | 1.17      |
|                   | mule deer             | 0.82      | 1.05     | 2.12     | 3.19     | 3.42      |
|                   | north american badger | 0.42      | 0.70     | 2.01     | 3.32     | 3.58      |
|                   | north american beaver | 0.39      | 0.68     | 2.02     | 3.33     | 3.58      |
|                   | north american mink   | 0.44      | 0.72     | 1.94     | 3.20     | 3.44      |
|                   | raccoon               | 0.63      | 0.69     | 0.97     | 1.26     | 1.31      |
|                   | red fox               | 0.34      | 0.53     | 1.52     | 2.61     | 2.84      |
|                   | red squirrel          | 0.74      | 1.02     | 2.21     | 3.38     | 3.62      |
|                   | striped skunk         | 1.40      | 1.49     | 1.94     | 2.38     | 2.46      |
| virginia opossum  | 0.59                  | 0.64      | 0.92     | 1.20     | 1.26     |           |
| white tailed deer | 2.08                  | 2.16      | 2.56     | 3.01     | 3.09     |           |
| woodchuck         | 0.20                  | 0.47      | 1.61     | 2.74     | 2.98     |           |
| Denver, CO        | armadillo             | 0.33      | 0.56     | 1.60     | 2.66     | 2.88      |
|                   | bobcat                | 0.66      | 0.89     | 1.95     | 3.00     | 3.21      |
|                   | cottontail sp         | 0.25      | 0.43     | 1.28     | 2.06     | 2.22      |
|                   | coyote                | 0.37      | 0.54     | 1.28     | 2.09     | 2.26      |
|                   | eastern chipmunk      | 0.40      | 0.62     | 1.64     | 2.70     | 2.90      |
|                   | elk                   | 0.73      | 0.98     | 2.20     | 3.45     | 3.71      |
|                   | flying squirrel sp    | -0.07     | 0.19     | 1.56     | 2.89     | 3.16      |
|                   | fox squirrel          | 0.46      | 0.59     | 1.29     | 2.04     | 2.21      |
|                   | gray fox              | 0.99      | 1.22     | 2.34     | 3.46     | 3.69      |
|                   | gray squirrel sp      | 0.11      | 0.33     | 1.31     | 2.30     | 2.53      |
|                   | mule deer             | 1.19      | 1.34     | 2.09     | 2.84     | 2.99      |
|                   | north american badger | 0.43      | 0.70     | 2.03     | 3.30     | 3.57      |
|                   | north american beaver | 0.36      | 0.66     | 1.99     | 3.31     | 3.57      |
|                   | north american mink   | 0.34      | 0.62     | 1.87     | 3.10     | 3.37      |

**Table S30:** Species and city-specific autologistic parameters for the occupancy model. Note that all of these species do not likely reside in this city (that is controlled by another level of the model). (*continued*)

| City                | Species               | CI(0.025) | CI(0.05) | Estimate | CI(0.95) | CI(0.975) |
|---------------------|-----------------------|-----------|----------|----------|----------|-----------|
| Houston, TX         | raccoon               | 0.52      | 0.64     | 1.25     | 1.88     | 2.01      |
|                     | red fox               | 0.61      | 0.73     | 1.44     | 2.20     | 2.35      |
|                     | red squirrel          | 0.74      | 1.01     | 2.18     | 3.32     | 3.55      |
|                     | striped skunk         | 1.12      | 1.29     | 2.13     | 2.96     | 3.13      |
|                     | virginia opossum      | 0.12      | 0.33     | 1.32     | 2.29     | 2.48      |
|                     | white tailed deer     | 0.79      | 0.99     | 2.01     | 2.99     | 3.21      |
|                     | woodchuck             | 0.31      | 0.55     | 1.66     | 2.81     | 3.10      |
|                     | armadillo             | 0.57      | 0.70     | 1.36     | 2.07     | 2.20      |
|                     | bobcat                | 0.80      | 0.99     | 1.97     | 2.97     | 3.18      |
|                     | cottontail sp         | 1.60      | 1.72     | 2.38     | 3.12     | 3.28      |
|                     | coyote                | 0.12      | 0.26     | 1.05     | 1.86     | 2.02      |
|                     | eastern chipmunk      | 0.38      | 0.62     | 1.65     | 2.70     | 2.92      |
|                     | elk                   | 0.71      | 0.99     | 2.34     | 3.67     | 3.94      |
|                     | flying squirrel sp    | -0.09     | 0.18     | 1.56     | 2.88     | 3.15      |
|                     | fox squirrel          | -0.08     | 0.05     | 0.79     | 1.53     | 1.68      |
|                     | gray fox              | 1.10      | 1.33     | 2.34     | 3.32     | 3.56      |
|                     | gray squirrel sp      | -0.11     | 0.01     | 0.66     | 1.28     | 1.40      |
|                     | mule deer             | 0.76      | 1.02     | 2.13     | 3.18     | 3.40      |
|                     | north american badger | 0.46      | 0.72     | 2.02     | 3.31     | 3.59      |
|                     | north american beaver | 0.45      | 0.73     | 2.01     | 3.31     | 3.57      |
| north american mink | 0.36                  | 0.63      | 1.90     | 3.14     | 3.42     |           |
| raccoon             | 0.58                  | 0.70      | 1.30     | 1.92     | 2.06     |           |
| red fox             | 0.04                  | 0.26      | 1.31     | 2.40     | 2.63     |           |
| red squirrel        | 0.75                  | 1.03      | 2.21     | 3.36     | 3.60     |           |
| striped skunk       | 1.41                  | 1.56      | 2.36     | 3.25     | 3.44     |           |
| virginia opossum    | 0.37                  | 0.49      | 1.12     | 1.77     | 1.90     |           |
| white tailed deer   | 1.82                  | 1.97      | 2.85     | 3.93     | 4.15     |           |
| woodchuck           | 0.31                  | 0.55      | 1.67     | 2.81     | 3.08     |           |
| Indianapolis, IN    | armadillo             | 0.33      | 0.56     | 1.61     | 2.68     | 2.93      |
|                     | bobcat                | 0.63      | 0.89     | 1.97     | 3.01     | 3.25      |
|                     | cottontail sp         | 0.86      | 0.93     | 1.28     | 1.65     | 1.70      |
|                     | coyote                | 0.21      | 0.29     | 0.74     | 1.17     | 1.26      |
|                     | eastern chipmunk      | 1.11      | 1.24     | 1.95     | 2.70     | 2.84      |
|                     | elk                   | 0.72      | 1.02     | 2.34     | 3.67     | 3.94      |
|                     | flying squirrel sp    | -0.09     | 0.17     | 1.54     | 2.84     | 3.12      |
|                     | fox squirrel          | 0.46      | 0.54     | 0.94     | 1.36     | 1.44      |
|                     | gray fox              | 0.93      | 1.16     | 2.34     | 3.47     | 3.72      |
|                     | gray squirrel sp      | 0.31      | 0.45     | 1.10     | 1.72     | 1.84      |
|                     | mule deer             | 0.81      | 1.03     | 2.13     | 3.22     | 3.45      |
|                     | north american badger | 0.38      | 0.70     | 2.01     | 3.34     | 3.62      |
|                     | north american beaver | 0.14      | 0.42     | 1.67     | 2.80     | 3.00      |
|                     | north american mink   | 0.96      | 1.15     | 2.09     | 3.11     | 3.35      |
|                     | raccoon               | 0.84      | 0.92     | 1.37     | 1.83     | 1.93      |
|                     | red fox               | 0.87      | 0.95     | 1.43     | 1.93     | 2.02      |
|                     | red squirrel          | 1.40      | 1.53     | 2.20     | 2.88     | 3.01      |
|                     | striped skunk         | 1.05      | 1.26     | 2.19     | 3.16     | 3.36      |
|                     | virginia opossum      | 0.80      | 0.88     | 1.25     | 1.62     | 1.69      |
|                     | white tailed deer     | 1.14      | 1.22     | 1.66     | 2.11     | 2.20      |
| woodchuck           | 0.53                  | 0.65      | 1.27     | 1.88     | 2.00     |           |

**Table S30:** Species and city-specific autologistic parameters for the occupancy model. Note that all of these species do not likely reside in this city (that is controlled by another level of the model). (*continued*)

| City                  | Species               | CI(0.025) | CI(0.05) | Estimate | CI(0.95) | CI(0.975) |      |
|-----------------------|-----------------------|-----------|----------|----------|----------|-----------|------|
| Iowa City, IA         | armadillo             | 0.34      | 0.56     | 1.61     | 2.67     | 2.92      |      |
|                       | bobcat                | 0.68      | 0.87     | 1.82     | 2.74     | 2.94      |      |
|                       | cottontail sp         | 0.76      | 0.83     | 1.23     | 1.64     | 1.71      |      |
|                       | coyote                | 0.04      | 0.15     | 0.62     | 1.10     | 1.20      |      |
|                       | eastern chipmunk      | 0.33      | 0.47     | 1.14     | 1.75     | 1.85      |      |
|                       | elk                   | 0.68      | 1.00     | 2.34     | 3.69     | 3.98      |      |
|                       | flying squirrel sp    | -0.10     | 0.17     | 1.56     | 2.85     | 3.13      |      |
|                       | fox squirrel          | 0.73      | 0.81     | 1.22     | 1.66     | 1.73      |      |
|                       | gray fox              | 0.90      | 1.15     | 2.28     | 3.39     | 3.63      |      |
|                       | gray squirrel sp      | 0.28      | 0.38     | 0.79     | 1.21     | 1.29      |      |
|                       | mule deer             | 0.82      | 1.07     | 2.14     | 3.21     | 3.45      |      |
|                       | north american badger | 0.36      | 0.63     | 1.90     | 3.09     | 3.33      |      |
|                       | north american beaver | 0.39      | 0.70     | 2.00     | 3.29     | 3.54      |      |
|                       | north american mink   | 0.73      | 0.88     | 1.61     | 2.40     | 2.56      |      |
|                       | raccoon               | 0.04      | 0.13     | 0.59     | 1.03     | 1.12      |      |
|                       | red fox               | 0.56      | 0.64     | 1.05     | 1.47     | 1.55      |      |
|                       | red squirrel          | 0.73      | 1.00     | 2.20     | 3.41     | 3.65      |      |
|                       | striped skunk         | 0.96      | 1.12     | 1.95     | 2.76     | 2.92      |      |
|                       | virginia opossum      | -0.28     | -0.20    | 0.19     | 0.57     | 0.64      |      |
|                       | white tailed deer     | 0.43      | 0.55     | 1.12     | 1.69     | 1.81      |      |
|                       | woodchuck             | -0.01     | 0.15     | 0.93     | 1.66     | 1.79      |      |
|                       | Jackson, MS           | armadillo | 1.11     | 1.25     | 1.94     | 2.69      | 2.86 |
|                       |                       | bobcat    | 1.20     | 1.36     | 2.24     | 3.23      | 3.44 |
| cottontail sp         |                       | 0.44      | 0.60     | 1.41     | 2.21     | 2.36      |      |
| coyote                |                       | -0.13     | 0.07     | 0.96     | 1.80     | 1.95      |      |
| eastern chipmunk      |                       | 0.40      | 0.60     | 1.65     | 2.70     | 2.91      |      |
| elk                   |                       | 0.71      | 1.03     | 2.36     | 3.66     | 3.91      |      |
| flying squirrel sp    |                       | -0.10     | 0.21     | 1.57     | 2.89     | 3.15      |      |
| fox squirrel          |                       | 0.31      | 0.54     | 1.74     | 3.03     | 3.32      |      |
| gray fox              |                       | 1.09      | 1.29     | 2.20     | 3.01     | 3.17      |      |
| gray squirrel sp      |                       | 1.10      | 1.19     | 1.74     | 2.34     | 2.47      |      |
| mule deer             |                       | 0.79      | 1.05     | 2.13     | 3.21     | 3.43      |      |
| north american badger |                       | 0.43      | 0.70     | 2.02     | 3.31     | 3.59      |      |
| north american beaver |                       | 0.43      | 0.70     | 2.01     | 3.35     | 3.61      |      |
| north american mink   |                       | 0.38      | 0.63     | 1.86     | 3.11     | 3.40      |      |
| raccoon               |                       | 0.83      | 0.92     | 1.40     | 1.90     | 2.00      |      |
| red fox               |                       | 0.78      | 0.91     | 1.52     | 2.15     | 2.27      |      |
| red squirrel          |                       | 0.72      | 1.00     | 2.21     | 3.38     | 3.63      |      |
| striped skunk         |                       | 0.75      | 0.96     | 1.96     | 2.85     | 3.02      |      |
| virginia opossum      |                       | 0.66      | 0.75     | 1.28     | 1.83     | 1.94      |      |
| white tailed deer     |                       | 1.37      | 1.47     | 2.06     | 2.66     | 2.79      |      |
| woodchuck             |                       | 0.27      | 0.54     | 1.67     | 2.83     | 3.06      |      |
| Little Rock, AR       |                       | armadillo | 0.56     | 0.65     | 1.18     | 1.68      | 1.77 |
|                       |                       | bobcat    | 0.80     | 0.98     | 1.81     | 2.63      | 2.80 |
|                       | cottontail sp         | 1.21      | 1.31     | 1.78     | 2.29     | 2.39      |      |
|                       | coyote                | 0.43      | 0.57     | 1.32     | 2.09     | 2.24      |      |
|                       | eastern chipmunk      | 0.94      | 1.09     | 1.91     | 2.76     | 2.94      |      |
|                       | elk                   | 0.73      | 1.00     | 2.35     | 3.70     | 3.97      |      |
|                       | flying squirrel sp    | -0.22     | 0.09     | 1.56     | 3.00     | 3.27      |      |

**Table S30:** Species and city-specific autologistic parameters for the occupancy model. Note that all of these species do not likely reside in this city (that is controlled by another level of the model). (*continued*)

| City              | Species               | CI(0.025) | CI(0.05) | Estimate | CI(0.95) | CI(0.975) |
|-------------------|-----------------------|-----------|----------|----------|----------|-----------|
| Madison, WI       | fox squirrel          | 0.36      | 0.47     | 1.02     | 1.54     | 1.65      |
|                   | gray fox              | 1.58      | 1.71     | 2.42     | 3.18     | 3.34      |
|                   | gray squirrel sp      | 0.46      | 0.57     | 1.19     | 1.82     | 1.96      |
|                   | mule deer             | 0.78      | 1.02     | 2.14     | 3.21     | 3.42      |
|                   | north american badger | 0.41      | 0.69     | 2.02     | 3.32     | 3.57      |
|                   | north american beaver | 0.37      | 0.65     | 2.00     | 3.31     | 3.58      |
|                   | north american mink   | 0.66      | 0.88     | 2.08     | 3.29     | 3.56      |
|                   | raccoon               | 0.96      | 1.06     | 1.61     | 2.19     | 2.31      |
|                   | red fox               | 0.96      | 1.10     | 1.88     | 2.74     | 2.92      |
|                   | red squirrel          | 0.74      | 0.98     | 2.22     | 3.39     | 3.68      |
|                   | striped skunk         | 1.63      | 1.78     | 2.51     | 3.33     | 3.51      |
|                   | virginia opossum      | 0.62      | 0.75     | 1.37     | 1.99     | 2.12      |
|                   | white tailed deer     | 1.35      | 1.45     | 2.01     | 2.59     | 2.70      |
|                   | woodchuck             | 1.09      | 1.26     | 2.14     | 3.16     | 3.38      |
|                   | armadillo             | 0.33      | 0.57     | 1.62     | 2.68     | 2.90      |
|                   | bobcat                | 0.67      | 0.89     | 1.96     | 3.02     | 3.24      |
|                   | cottontail sp         | 0.62      | 0.78     | 1.52     | 2.30     | 2.46      |
|                   | coyote                | 0.21      | 0.39     | 1.24     | 2.09     | 2.28      |
|                   | eastern chipmunk      | 0.21      | 0.44     | 1.45     | 2.39     | 2.57      |
|                   | elk                   | 0.74      | 1.02     | 2.35     | 3.70     | 4.00      |
|                   | flying squirrel sp    | -0.10     | 0.20     | 1.55     | 2.87     | 3.14      |
|                   | fox squirrel          | -0.29     | 0.05     | 1.43     | 2.84     | 3.17      |
|                   | gray fox              | 0.96      | 1.21     | 2.34     | 3.46     | 3.70      |
|                   | gray squirrel sp      | 0.38      | 0.50     | 1.24     | 2.02     | 2.15      |
|                   | mule deer             | 0.81      | 1.05     | 2.14     | 3.22     | 3.45      |
|                   | north american badger | 0.46      | 0.74     | 2.03     | 3.29     | 3.54      |
|                   | north american beaver | 0.33      | 0.63     | 1.98     | 3.30     | 3.54      |
|                   | north american mink   | 0.33      | 0.59     | 1.82     | 2.99     | 3.25      |
|                   | raccoon               | 0.47      | 0.60     | 1.28     | 2.01     | 2.14      |
|                   | red fox               | 0.04      | 0.23     | 1.31     | 2.41     | 2.65      |
|                   | red squirrel          | 0.68      | 1.00     | 2.22     | 3.37     | 3.64      |
|                   | striped skunk         | 0.72      | 0.95     | 1.96     | 2.93     | 3.12      |
| virginia opossum  | 0.41                  | 0.58      | 1.39     | 2.28     | 2.46     |           |
| white tailed deer | 1.09                  | 1.28      | 2.16     | 3.11     | 3.32     |           |
| woodchuck         | 0.23                  | 0.49      | 1.60     | 2.73     | 2.95     |           |
| Metro LA, CA      | armadillo             | 0.33      | 0.56     | 1.61     | 2.70     | 2.93      |
|                   | bobcat                | 1.44      | 1.53     | 2.04     | 2.59     | 2.69      |
|                   | cottontail sp         | 1.98      | 2.07     | 2.55     | 3.06     | 3.15      |
|                   | coyote                | 0.83      | 0.91     | 1.33     | 1.75     | 1.84      |
|                   | eastern chipmunk      | 0.32      | 0.56     | 1.58     | 2.57     | 2.79      |
|                   | elk                   | 0.68      | 1.02     | 2.34     | 3.65     | 3.95      |
|                   | flying squirrel sp    | -0.11     | 0.18     | 1.55     | 2.87     | 3.16      |
|                   | fox squirrel          | -0.70     | -0.44    | 0.66     | 1.55     | 1.72      |
|                   | gray fox              | 1.77      | 1.91     | 2.65     | 3.45     | 3.61      |
|                   | gray squirrel sp      | 0.80      | 0.96     | 1.74     | 2.52     | 2.69      |
|                   | mule deer             | 1.30      | 1.41     | 2.00     | 2.60     | 2.72      |
|                   | north american badger | 0.41      | 0.70     | 2.04     | 3.31     | 3.56      |
|                   | north american beaver | 0.40      | 0.68     | 2.02     | 3.32     | 3.60      |
|                   | north american mink   | 0.40      | 0.66     | 1.89     | 3.14     | 3.40      |



**Table S30:** Species and city-specific autologistic parameters for the occupancy model. Note that all of these species do not likely reside in this city (that is controlled by another level of the model). (*continued*)

| City                | Species               | CI(0.025) | CI(0.05) | Estimate | CI(0.95) | CI(0.975) |
|---------------------|-----------------------|-----------|----------|----------|----------|-----------|
| Washington D.C.     | raccoon               | 0.10      | 0.21     | 0.82     | 1.42     | 1.54      |
|                     | red fox               | 0.06      | 0.26     | 1.31     | 2.41     | 2.65      |
|                     | red squirrel          | 0.75      | 0.98     | 2.21     | 3.39     | 3.61      |
|                     | striped skunk         | 1.25      | 1.38     | 1.95     | 2.52     | 2.63      |
|                     | virginia opossum      | 1.12      | 1.22     | 1.80     | 2.42     | 2.54      |
|                     | white tailed deer     | 0.81      | 1.04     | 2.06     | 3.07     | 3.27      |
|                     | woodchuck             | 0.25      | 0.52     | 1.66     | 2.82     | 3.08      |
|                     | armadillo             | 0.37      | 0.57     | 1.61     | 2.65     | 2.91      |
|                     | bobcat                | 0.67      | 0.92     | 1.97     | 3.01     | 3.24      |
|                     | cottontail sp         | 1.56      | 1.65     | 2.12     | 2.60     | 2.69      |
|                     | coyote                | 0.63      | 0.76     | 1.41     | 2.06     | 2.19      |
|                     | eastern chipmunk      | 0.96      | 1.07     | 1.67     | 2.25     | 2.34      |
|                     | elk                   | 0.75      | 1.03     | 2.34     | 3.69     | 3.98      |
|                     | flying squirrel sp    | -0.12     | 0.15     | 1.49     | 2.72     | 2.97      |
|                     | fox squirrel          | -0.23     | 0.06     | 1.41     | 2.85     | 3.19      |
|                     | gray fox              | 2.01      | 2.17     | 3.10     | 4.25     | 4.52      |
|                     | gray squirrel sp      | 0.80      | 0.89     | 1.40     | 1.92     | 2.02      |
|                     | mule deer             | 0.82      | 1.03     | 2.14     | 3.21     | 3.45      |
|                     | north american badger | 0.43      | 0.71     | 2.03     | 3.33     | 3.61      |
|                     | north american beaver | 0.38      | 0.68     | 2.01     | 3.33     | 3.65      |
| north american mink | 0.33                  | 0.61      | 1.82     | 3.02     | 3.25     |           |
| raccoon             | 0.20                  | 0.28      | 0.73     | 1.18     | 1.27     |           |
| red fox             | 0.25                  | 0.34      | 0.83     | 1.32     | 1.42     |           |
| red squirrel        | 0.73                  | 1.01      | 2.20     | 3.38     | 3.59     |           |
| striped skunk       | 0.87                  | 1.09      | 2.08     | 3.08     | 3.30     |           |
| virginia opossum    | 1.23                  | 1.30      | 1.70     | 2.12     | 2.21     |           |
| white tailed deer   | 1.54                  | 1.64      | 2.17     | 2.75     | 2.88     |           |
| woodchuck           | 1.43                  | 1.58      | 2.36     | 3.19     | 3.37     |           |
| Phoenix, AZ         | armadillo             | 0.36      | 0.58     | 1.61     | 2.67     | 2.89      |
|                     | bobcat                | 1.33      | 1.42     | 1.90     | 2.41     | 2.50      |
|                     | cottontail sp         | 2.24      | 2.32     | 2.75     | 3.20     | 3.29      |
|                     | coyote                | 1.43      | 1.52     | 2.00     | 2.52     | 2.62      |
|                     | eastern chipmunk      | 0.37      | 0.61     | 1.65     | 2.70     | 2.90      |
|                     | elk                   | 0.72      | 1.02     | 2.33     | 3.65     | 3.96      |
|                     | flying squirrel sp    | -0.08     | 0.24     | 1.55     | 2.87     | 3.13      |
|                     | fox squirrel          | -0.25     | 0.04     | 1.42     | 2.86     | 3.19      |
|                     | gray fox              | 1.45      | 1.54     | 2.01     | 2.49     | 2.58      |
|                     | gray squirrel sp      | 0.13      | 0.34     | 1.31     | 2.32     | 2.51      |
|                     | mule deer             | 2.02      | 2.13     | 2.78     | 3.52     | 3.68      |
|                     | north american badger | 1.50      | 1.66     | 2.51     | 3.43     | 3.61      |
|                     | north american beaver | 0.86      | 1.08     | 2.31     | 3.66     | 3.94      |
|                     | north american mink   | 0.41      | 0.66     | 1.89     | 3.12     | 3.41      |
|                     | raccoon               | 1.38      | 1.48     | 1.92     | 2.40     | 2.50      |
|                     | red fox               | 0.03      | 0.26     | 1.32     | 2.39     | 2.65      |
|                     | red squirrel          | 0.76      | 1.01     | 2.20     | 3.38     | 3.63      |
|                     | striped skunk         | 1.35      | 1.50     | 2.25     | 3.01     | 3.17      |
|                     | virginia opossum      | 0.16      | 0.38     | 1.36     | 2.34     | 2.54      |
|                     | white tailed deer     | 0.84      | 1.04     | 2.04     | 3.07     | 3.31      |
| woodchuck           | 0.29                  | 0.54      | 1.68     | 2.82     | 3.05     |           |

**Table S30:** Species and city-specific autologistic parameters for the occupancy model. Note that all of these species do not likely reside in this city (that is controlled by another level of the model). (*continued*)

| City                  | Species               | CI(0.025) | CI(0.05) | Estimate | CI(0.95) | CI(0.975) |      |
|-----------------------|-----------------------|-----------|----------|----------|----------|-----------|------|
| Portland, Oregon      | armadillo             | 0.31      | 0.55     | 1.61     | 2.69     | 2.92      |      |
|                       | bobcat                | 0.69      | 0.91     | 1.97     | 3.02     | 3.23      |      |
|                       | cottontail sp         | -0.17     | -0.04    | 0.80     | 1.58     | 1.72      |      |
|                       | coyote                | -0.21     | -0.05    | 0.68     | 1.37     | 1.52      |      |
|                       | eastern chipmunk      | 0.40      | 0.63     | 1.64     | 2.67     | 2.86      |      |
|                       | elk                   | 0.71      | 1.00     | 2.34     | 3.66     | 3.93      |      |
|                       | flying squirrel sp    | -0.10     | 0.20     | 1.57     | 2.89     | 3.13      |      |
|                       | fox squirrel          | -0.76     | -0.59    | 0.29     | 1.12     | 1.29      |      |
|                       | gray fox              | 0.97      | 1.22     | 2.34     | 3.47     | 3.72      |      |
|                       | gray squirrel sp      | -0.17     | -0.01    | 0.70     | 1.40     | 1.54      |      |
|                       | mule deer             | 0.76      | 0.93     | 1.77     | 2.59     | 2.75      |      |
|                       | north american badger | 0.44      | 0.74     | 2.04     | 3.32     | 3.57      |      |
|                       | north american beaver | 0.39      | 0.65     | 2.00     | 3.26     | 3.54      |      |
|                       | north american mink   | 0.40      | 0.64     | 1.87     | 3.11     | 3.38      |      |
|                       | raccoon               | 0.11      | 0.25     | 0.96     | 1.67     | 1.80      |      |
|                       | red fox               | 0.05      | 0.28     | 1.33     | 2.42     | 2.68      |      |
|                       | red squirrel          | 0.74      | 1.01     | 2.20     | 3.41     | 3.63      |      |
|                       | striped skunk         | 1.00      | 1.23     | 2.24     | 3.29     | 3.49      |      |
|                       | virginia opossum      | -0.16     | 0.03     | 1.01     | 1.89     | 2.04      |      |
|                       | white tailed deer     | 0.84      | 1.06     | 2.08     | 3.11     | 3.31      |      |
|                       | woodchuck             | 0.24      | 0.53     | 1.67     | 2.83     | 3.04      |      |
|                       | Rochester, NY         | armadillo | 0.35     | 0.56     | 1.60     | 2.70      | 2.95 |
|                       |                       | bobcat    | 0.68     | 0.91     | 1.97     | 3.01      | 3.23 |
| cottontail sp         |                       | 1.26      | 1.40     | 2.09     | 2.88     | 3.04      |      |
| coyote                |                       | 0.36      | 0.49     | 1.21     | 1.94     | 2.07      |      |
| eastern chipmunk      |                       | 0.40      | 0.54     | 1.25     | 1.92     | 2.04      |      |
| elk                   |                       | 0.73      | 1.05     | 2.34     | 3.65     | 3.92      |      |
| flying squirrel sp    |                       | -0.11     | 0.17     | 1.49     | 2.72     | 2.97      |      |
| fox squirrel          |                       | -0.24     | 0.06     | 1.42     | 2.86     | 3.25      |      |
| gray fox              |                       | 0.70      | 0.96     | 2.07     | 3.02     | 3.21      |      |
| gray squirrel sp      |                       | 0.36      | 0.48     | 1.18     | 1.86     | 2.00      |      |
| mule deer             |                       | 0.79      | 1.02     | 2.14     | 3.23     | 3.47      |      |
| north american badger |                       | 0.43      | 0.70     | 2.03     | 3.29     | 3.55      |      |
| north american beaver |                       | 0.44      | 0.69     | 2.03     | 3.34     | 3.62      |      |
| north american mink   |                       | 0.36      | 0.61     | 1.86     | 3.09     | 3.35      |      |
| raccoon               |                       | 0.43      | 0.54     | 1.13     | 1.73     | 1.85      |      |
| red fox               |                       | -0.39     | -0.25    | 0.41     | 1.04     | 1.17      |      |
| red squirrel          |                       | 1.45      | 1.61     | 2.48     | 3.38     | 3.57      |      |
| striped skunk         |                       | 0.76      | 0.97     | 1.97     | 2.96     | 3.17      |      |
| virginia opossum      |                       | 0.92      | 1.04     | 1.66     | 2.35     | 2.49      |      |
| white tailed deer     |                       | 0.74      | 0.87     | 1.58     | 2.28     | 2.42      |      |
| woodchuck             |                       | 1.08      | 1.22     | 2.04     | 2.95     | 3.12      |      |
| Sanford, FL           |                       | armadillo | 0.93     | 1.07     | 1.78     | 2.54      | 2.71 |
|                       |                       | bobcat    | 0.44     | 0.69     | 1.81     | 2.85      | 3.08 |
|                       | cottontail sp         | 0.93      | 1.09     | 1.87     | 2.69     | 2.86      |      |
|                       | coyote                | 0.23      | 0.41     | 1.24     | 2.15     | 2.35      |      |
|                       | eastern chipmunk      | 0.39      | 0.61     | 1.64     | 2.66     | 2.87      |      |
|                       | elk                   | 0.71      | 0.98     | 2.33     | 3.66     | 3.95      |      |
|                       | flying squirrel sp    | -0.14     | 0.15     | 1.51     | 2.83     | 3.10      |      |

**Table S30:** Species and city-specific autologistic parameters for the occupancy model. Note that all of these species do not likely reside in this city (that is controlled by another level of the model). (continued)

| City                  | Species               | CI(0.025) | CI(0.05) | Estimate | CI(0.95) | CI(0.975) |
|-----------------------|-----------------------|-----------|----------|----------|----------|-----------|
| Salt Lake City, UT    | fox squirrel          | -0.20     | 0.11     | 1.41     | 2.84     | 3.19      |
|                       | gray fox              | 0.93      | 1.20     | 2.31     | 3.41     | 3.63      |
|                       | gray squirrel sp      | 0.32      | 0.43     | 0.99     | 1.57     | 1.68      |
|                       | mule deer             | 0.78      | 1.03     | 2.13     | 3.20     | 3.43      |
|                       | north american badger | 0.42      | 0.70     | 2.02     | 3.29     | 3.55      |
|                       | north american beaver | 0.39      | 0.70     | 2.03     | 3.30     | 3.56      |
|                       | north american mink   | 0.40      | 0.66     | 1.89     | 3.13     | 3.41      |
|                       | raccoon               | 0.23      | 0.34     | 0.90     | 1.44     | 1.55      |
|                       | red fox               | 0.01      | 0.26     | 1.32     | 2.41     | 2.64      |
|                       | red squirrel          | 0.78      | 1.03     | 2.22     | 3.40     | 3.66      |
|                       | striped skunk         | 0.87      | 1.09     | 2.07     | 3.07     | 3.28      |
|                       | virginia opossum      | 0.66      | 0.78     | 1.44     | 2.09     | 2.21      |
|                       | white tailed deer     | 0.96      | 1.10     | 1.91     | 2.71     | 2.90      |
|                       | woodchuck             | 0.27      | 0.52     | 1.66     | 2.82     | 3.09      |
|                       | armadillo             | 0.34      | 0.57     | 1.61     | 2.66     | 2.91      |
|                       | bobcat                | 0.66      | 0.88     | 1.97     | 3.02     | 3.26      |
|                       | cottontail sp         | 0.38      | 0.58     | 1.68     | 2.73     | 2.97      |
|                       | coyote                | 0.08      | 0.29     | 1.26     | 2.24     | 2.44      |
|                       | eastern chipmunk      | 0.40      | 0.62     | 1.64     | 2.67     | 2.90      |
|                       | elk                   | 0.74      | 1.02     | 2.34     | 3.64     | 3.93      |
|                       | flying squirrel sp    | -0.09     | 0.17     | 1.56     | 2.86     | 3.14      |
|                       | fox squirrel          | -0.25     | 0.06     | 1.42     | 2.84     | 3.18      |
|                       | gray fox              | 0.97      | 1.21     | 2.34     | 3.48     | 3.76      |
|                       | gray squirrel sp      | 0.16      | 0.36     | 1.33     | 2.32     | 2.54      |
|                       | mule deer             | 0.81      | 1.04     | 2.12     | 3.22     | 3.46      |
|                       | north american badger | 0.42      | 0.70     | 2.03     | 3.32     | 3.60      |
|                       | north american beaver | 0.42      | 0.68     | 2.01     | 3.35     | 3.64      |
|                       | north american mink   | 0.41      | 0.66     | 1.88     | 3.15     | 3.45      |
|                       | raccoon               | 0.10      | 0.29     | 1.18     | 2.07     | 2.25      |
|                       | red fox               | -0.01     | 0.24     | 1.34     | 2.43     | 2.66      |
|                       | red squirrel          | 0.74      | 1.01     | 2.20     | 3.39     | 3.63      |
|                       | striped skunk         | 0.82      | 1.06     | 2.08     | 3.09     | 3.28      |
| virginia opossum      | 0.14                  | 0.34      | 1.35     | 2.34     | 2.56     |           |
| white tailed deer     | 0.83                  | 1.06      | 2.07     | 3.13     | 3.35     |           |
| woodchuck             | 0.27                  | 0.51      | 1.66     | 2.80     | 3.08     |           |
| armadillo             | 0.34                  | 0.57      | 1.61     | 2.68     | 2.92     |           |
| bobcat                | 1.15                  | 1.34      | 2.28     | 3.29     | 3.51     |           |
| cottontail sp         | 1.12                  | 1.22      | 1.75     | 2.30     | 2.40     |           |
| coyote                | 1.21                  | 1.33      | 1.88     | 2.52     | 2.65     |           |
| eastern chipmunk      | 0.40                  | 0.61      | 1.67     | 2.67     | 2.89     |           |
| elk                   | 1.58                  | 1.76      | 2.85     | 4.10     | 4.40     |           |
| flying squirrel sp    | -0.12                 | 0.19      | 1.57     | 2.87     | 3.16     |           |
| fox squirrel          | -0.24                 | 0.08      | 1.42     | 2.86     | 3.22     |           |
| gray fox              | 0.97                  | 1.20      | 2.34     | 3.47     | 3.73     |           |
| gray squirrel sp      | 0.85                  | 0.94      | 1.45     | 2.01     | 2.10     |           |
| mule deer             | 1.32                  | 1.45      | 2.10     | 2.78     | 2.92     |           |
| north american badger | 0.46                  | 0.73      | 2.02     | 3.30     | 3.56     |           |
| north american beaver | 0.40                  | 0.68      | 2.02     | 3.32     | 3.60     |           |
| north american mink   | 0.36                  | 0.64      | 1.87     | 3.13     | 3.40     |           |

**Table S30:** Species and city-specific autologistic parameters for the occupancy model. Note that all of these species do not likely reside in this city (that is controlled by another level of the model). (*continued*)

| City                | Species               | CI(0.025) | CI(0.05) | Estimate | CI(0.95) | CI(0.975) |
|---------------------|-----------------------|-----------|----------|----------|----------|-----------|
| Saint Louis, MO     | raccoon               | 0.70      | 0.81     | 1.29     | 1.81     | 1.92      |
|                     | red fox               | 0.02      | 0.24     | 1.33     | 2.38     | 2.59      |
|                     | red squirrel          | 0.72      | 1.01     | 2.20     | 3.36     | 3.61      |
|                     | striped skunk         | 0.82      | 1.04     | 2.04     | 3.03     | 3.23      |
|                     | virginia opossum      | 0.67      | 0.79     | 1.39     | 1.99     | 2.10      |
|                     | white tailed deer     | 0.81      | 1.06     | 2.08     | 3.11     | 3.31      |
|                     | woodchuck             | 0.28      | 0.51     | 1.67     | 2.82     | 3.07      |
|                     | armadillo             | 1.10      | 1.23     | 1.83     | 2.46     | 2.59      |
|                     | bobcat                | 0.58      | 0.80     | 1.88     | 2.88     | 3.07      |
|                     | cottontail sp         | 0.64      | 0.74     | 1.18     | 1.64     | 1.72      |
|                     | coyote                | 1.09      | 1.20     | 1.81     | 2.52     | 2.67      |
|                     | eastern chipmunk      | 0.95      | 1.09     | 1.80     | 2.55     | 2.71      |
|                     | elk                   | 0.75      | 1.03     | 2.34     | 3.69     | 3.95      |
|                     | flying squirrel sp    | -0.09     | 0.19     | 1.55     | 2.86     | 3.15      |
|                     | fox squirrel          | 1.16      | 1.24     | 1.71     | 2.17     | 2.26      |
|                     | gray fox              | 1.45      | 1.65     | 2.71     | 3.85     | 4.10      |
|                     | gray squirrel sp      | 0.86      | 0.97     | 1.49     | 2.00     | 2.12      |
|                     | mule deer             | 0.77      | 1.01     | 2.14     | 3.18     | 3.39      |
|                     | north american badger | 0.43      | 0.73     | 2.03     | 3.31     | 3.59      |
|                     | north american beaver | 0.35      | 0.67     | 2.00     | 3.28     | 3.57      |
| north american mink | 0.25                  | 0.52      | 1.74     | 2.93     | 3.20     |           |
| raccoon             | 0.77                  | 0.85      | 1.27     | 1.68     | 1.75     |           |
| red fox             | 1.43                  | 1.51      | 2.02     | 2.54     | 2.65     |           |
| red squirrel        | 0.73                  | 0.99      | 2.20     | 3.38     | 3.62     |           |
| striped skunk       | 1.43                  | 1.57      | 2.25     | 2.97     | 3.11     |           |
| virginia opossum    | 0.75                  | 0.82      | 1.18     | 1.55     | 1.62     |           |
| white tailed deer   | 1.60                  | 1.71      | 2.28     | 2.91     | 3.03     |           |
| woodchuck           | 0.19                  | 0.37      | 1.19     | 1.95     | 2.09     |           |
| Tacoma, WA          | armadillo             | 0.36      | 0.56     | 1.61     | 2.65     | 2.89      |
|                     | bobcat                | 0.70      | 0.91     | 1.93     | 2.93     | 3.15      |
|                     | cottontail sp         | 0.87      | 0.95     | 1.45     | 1.95     | 2.05      |
|                     | coyote                | 0.33      | 0.42     | 0.87     | 1.34     | 1.42      |
|                     | eastern chipmunk      | 0.69      | 0.86     | 1.74     | 2.63     | 2.80      |
|                     | elk                   | 1.57      | 1.74     | 2.67     | 3.73     | 3.96      |
|                     | flying squirrel sp    | -0.11     | 0.20     | 1.56     | 2.86     | 3.15      |
|                     | fox squirrel          | -0.29     | 0.02     | 1.39     | 2.81     | 3.15      |
|                     | gray fox              | 0.92      | 1.19     | 2.35     | 3.48     | 3.73      |
|                     | gray squirrel sp      | 1.27      | 1.37     | 1.88     | 2.46     | 2.58      |
|                     | mule deer             | 1.66      | 1.78     | 2.40     | 3.08     | 3.24      |
|                     | north american badger | 0.43      | 0.69     | 2.03     | 3.29     | 3.56      |
|                     | north american beaver | 0.38      | 0.66     | 2.02     | 3.35     | 3.64      |
|                     | north american mink   | 0.36      | 0.63     | 1.89     | 3.14     | 3.40      |
|                     | raccoon               | 0.72      | 0.81     | 1.26     | 1.73     | 1.82      |
|                     | red fox               | 0.02      | 0.25     | 1.32     | 2.41     | 2.66      |
|                     | red squirrel          | 0.77      | 1.00     | 2.22     | 3.38     | 3.61      |
|                     | striped skunk         | 1.77      | 1.90     | 2.57     | 3.31     | 3.46      |
|                     | virginia opossum      | 0.90      | 0.97     | 1.45     | 1.93     | 2.03      |
|                     | white tailed deer     | 0.84      | 1.07     | 2.09     | 3.13     | 3.36      |
| woodchuck           | 0.29                  | 0.54      | 1.66     | 2.82     | 3.06     |           |

**Table S30:** Species and city-specific autologistic parameters for the occupancy model. Note that all of these species do not likely reside in this city (that is controlled by another level of the model). (*continued*)

| City                  | Species               | CI(0.025)     | CI(0.05) | Estimate | CI(0.95) | CI(0.975) |      |
|-----------------------|-----------------------|---------------|----------|----------|----------|-----------|------|
| Urbana, IL            | armadillo             | 0.34          | 0.57     | 1.60     | 2.68     | 2.89      |      |
|                       | bobcat                | 0.71          | 0.92     | 2.00     | 3.08     | 3.31      |      |
|                       | cottontail sp         | 1.07          | 1.17     | 1.80     | 2.46     | 2.58      |      |
|                       | coyote                | 0.26          | 0.38     | 0.95     | 1.53     | 1.64      |      |
|                       | eastern chipmunk      | 1.31          | 1.43     | 2.07     | 2.79     | 2.94      |      |
|                       | elk                   | 0.71          | 1.03     | 2.36     | 3.67     | 3.93      |      |
|                       | flying squirrel sp    | -0.13         | 0.17     | 1.53     | 2.84     | 3.08      |      |
|                       | fox squirrel          | 1.62          | 1.75     | 2.51     | 3.44     | 3.64      |      |
|                       | gray fox              | 0.93          | 1.18     | 2.33     | 3.44     | 3.66      |      |
|                       | gray squirrel sp      | 0.80          | 0.93     | 1.59     | 2.29     | 2.44      |      |
|                       | mule deer             | 0.80          | 1.04     | 2.13     | 3.20     | 3.44      |      |
|                       | north american badger | 0.41          | 0.68     | 1.99     | 3.27     | 3.51      |      |
|                       | north american beaver | 0.41          | 0.68     | 2.02     | 3.34     | 3.62      |      |
|                       | north american mink   | 0.34          | 0.51     | 1.38     | 2.25     | 2.44      |      |
|                       | raccoon               | 0.57          | 0.70     | 1.37     | 2.09     | 2.24      |      |
|                       | red fox               | 0.41          | 0.55     | 1.31     | 2.08     | 2.26      |      |
|                       | red squirrel          | 0.77          | 1.01     | 2.22     | 3.39     | 3.63      |      |
|                       | striped skunk         | 1.27          | 1.40     | 2.11     | 2.85     | 3.01      |      |
|                       | virginia opossum      | 0.83          | 0.96     | 1.65     | 2.38     | 2.55      |      |
|                       | white tailed deer     | 1.48          | 1.62     | 2.37     | 3.17     | 3.34      |      |
|                       | woodchuck             | 0.95          | 1.09     | 1.84     | 2.64     | 2.80      |      |
|                       | Wilmington, DE        | armadillo     | 0.34     | 0.57     | 1.60     | 2.68      | 2.87 |
|                       |                       | bobcat        | 0.67     | 0.92     | 1.97     | 3.02      | 3.29 |
|                       |                       | cottontail sp | 0.43     | 0.52     | 0.99     | 1.45      | 1.54 |
| coyote                |                       | 0.34          | 0.56     | 1.56     | 2.60     | 2.84      |      |
| eastern chipmunk      |                       | 0.26          | 0.44     | 1.28     | 2.07     | 2.21      |      |
| elk                   |                       | 0.71          | 1.01     | 2.33     | 3.65     | 3.90      |      |
| flying squirrel sp    |                       | -0.12         | 0.19     | 1.53     | 2.80     | 3.04      |      |
| fox squirrel          |                       | -0.29         | 0.02     | 1.40     | 2.86     | 3.18      |      |
| gray fox              |                       | 0.95          | 1.21     | 2.34     | 3.48     | 3.72      |      |
| gray squirrel sp      |                       | 1.12          | 1.23     | 1.77     | 2.33     | 2.44      |      |
| mule deer             |                       | 0.81          | 1.04     | 2.15     | 3.21     | 3.44      |      |
| north american badger |                       | 0.45          | 0.73     | 2.03     | 3.28     | 3.57      |      |
| north american beaver |                       | 1.51          | 1.67     | 2.61     | 3.69     | 3.92      |      |
| north american mink   |                       | 1.61          | 1.81     | 2.76     | 3.89     | 4.16      |      |
| raccoon               |                       | 0.30          | 0.41     | 0.97     | 1.54     | 1.62      |      |
| red fox               |                       | -0.11         | 0.04     | 0.71     | 1.35     | 1.48      |      |
| red squirrel          |                       | 1.07          | 1.30     | 2.40     | 3.56     | 3.80      |      |
| striped skunk         |                       | 1.24          | 1.39     | 2.11     | 2.84     | 2.99      |      |
| virginia opossum      |                       | 0.80          | 0.89     | 1.33     | 1.78     | 1.87      |      |
| white tailed deer     |                       | 1.39          | 1.52     | 2.13     | 2.77     | 2.90      |      |
| woodchuck             | 1.00                  | 1.10          | 1.68     | 2.31     | 2.44     |           |      |

**Table S31:** Community-level detection parameters.

| Parameter  | CI(0.025) | CI(0.05) | Estimate | CI(0.95) | CI(0.975) |
|------------|-----------|----------|----------|----------|-----------|
| intercept  | -3.10     | -3.02    | -2.60    | -2.19    | -2.11     |
| gent       | -0.81     | -0.74    | -0.42    | -0.14    | -0.09     |
| imp        | -0.25     | -0.17    | 0.23     | 0.61     | 0.69      |
| gent X imp | -1.78     | -1.62    | -0.83    | -0.15    | -0.02     |

**Table S32:** Species-level standard deviation of their among-city detection parameters from the community-level averages.

| Parameter  | CI(0.025) | CI(0.05) | Estimate | CI(0.95) | CI(0.975) |
|------------|-----------|----------|----------|----------|-----------|
| intercept  | 0.43      | 0.48     | 0.88     | 1.50     | 1.65      |
| gent       | 0.98      | 1.14     | 2.46     | 5.11     | 5.71      |
| imp        | 0.65      | 0.77     | 1.84     | 4.09     | 4.75      |
| gent X imp | 0.33      | 0.41     | 1.30     | 3.56     | 4.19      |

**Table S33:** Estimated hyperparameters for the Gamma distributions that informed species and city-specific variability around a species among-city mean with respect to their detection probability.

| Parameter  | Shape or rate | CI(0.025) | CI(0.05) | Estimate | CI(0.95) | CI(0.975) |
|------------|---------------|-----------|----------|----------|----------|-----------|
| intercept  | shape         | 3.09      | 3.70     | 7.57     | 9.77     | 9.89      |
|            | rate          | 1.72      | 2.08     | 4.58     | 6.81     | 7.20      |
| gent       | shape         | 1.31      | 1.53     | 3.38     | 7.51     | 8.38      |
|            | rate          | 0.63      | 0.78     | 2.16     | 5.59     | 6.45      |
| imp        | shape         | 1.15      | 1.30     | 2.04     | 2.83     | 2.98      |
|            | rate          | 4.06      | 4.69     | 8.19     | 9.84     | 9.92      |
| gent X imp | shape         | 0.53      | 0.57     | 0.86     | 1.22     | 1.30      |
|            | rate          | 4.92      | 5.59     | 8.68     | 9.89     | 9.94      |



**Table S34:** Species-specific but among-city average estimates related to a species detection probability.

| Parameter             | Species               | CI(0.025)     | CI(0.05) | Estimate | CI(0.95) | CI(0.975) |      |
|-----------------------|-----------------------|---------------|----------|----------|----------|-----------|------|
| intercept             | armadillo             | -2.68         | -2.57    | -2.06    | -1.59    | -1.49     |      |
|                       | bobcat                | -4.58         | -4.48    | -3.94    | -3.47    | -3.38     |      |
|                       | cottontail sp         | -2.06         | -2.00    | -1.68    | -1.39    | -1.32     |      |
|                       | coyote                | -2.93         | -2.87    | -2.61    | -2.35    | -2.30     |      |
|                       | eastern chipmunk      | -2.54         | -2.46    | -2.05    | -1.67    | -1.60     |      |
|                       | elk                   | -4.45         | -4.24    | -3.24    | -2.37    | -2.21     |      |
|                       | flying squirrel sp    | -4.45         | -4.29    | -3.58    | -2.94    | -2.83     |      |
|                       | fox squirrel          | -2.35         | -2.24    | -1.82    | -1.44    | -1.37     |      |
|                       | gray fox              | -3.70         | -3.56    | -2.93    | -2.41    | -2.31     |      |
|                       | gray squirrel sp      | -1.12         | -1.07    | -0.79    | -0.51    | -0.46     |      |
|                       | mule deer             | -2.31         | -2.20    | -1.70    | -1.23    | -1.13     |      |
|                       | north american badger | -4.89         | -4.69    | -3.67    | -2.77    | -2.59     |      |
|                       | north american beaver | -4.90         | -4.73    | -3.94    | -3.27    | -3.13     |      |
|                       | north american mink   | -5.04         | -4.90    | -4.23    | -3.66    | -3.56     |      |
|                       | raccoon               | -1.84         | -1.79    | -1.53    | -1.27    | -1.21     |      |
|                       | red fox               | -2.86         | -2.78    | -2.40    | -2.04    | -1.97     |      |
|                       | red squirrel          | -3.10         | -2.96    | -2.29    | -1.68    | -1.54     |      |
|                       | striped skunk         | -3.46         | -3.36    | -2.93    | -2.57    | -2.49     |      |
|                       | virginia opossum      | -2.14         | -2.08    | -1.83    | -1.59    | -1.54     |      |
|                       | white tailed deer     | -1.96         | -1.87    | -1.51    | -1.19    | -1.13     |      |
|                       | woodchuck             | -3.48         | -3.36    | -2.91    | -2.50    | -2.42     |      |
|                       | gent                  | armadillo     | -0.88    | -0.74    | -0.06    | 0.59      | 0.72 |
|                       |                       | bobcat        | -1.14    | -1.01    | -0.41    | 0.16      | 0.27 |
|                       |                       | cottontail sp | -0.59    | -0.52    | -0.19    | 0.11      | 0.17 |
|                       |                       | coyote        | -0.54    | -0.46    | -0.11    | 0.19      | 0.25 |
| eastern chipmunk      |                       | -1.55         | -1.42    | -0.73    | -0.08    | 0.06      |      |
| elk                   |                       | -2.21         | -1.94    | -0.68    | 0.41     | 0.65      |      |
| flying squirrel sp    |                       | -2.42         | -2.17    | -1.07    | -0.13    | 0.03      |      |
| fox squirrel          |                       | -0.74         | -0.63    | -0.10    | 0.37     | 0.46      |      |
| gray fox              |                       | -1.84         | -1.60    | -0.65    | 0.23     | 0.41      |      |
| gray squirrel sp      |                       | -0.71         | -0.65    | -0.36    | -0.09    | -0.03     |      |
| mule deer             |                       | -2.04         | -1.92    | -1.28    | -0.61    | -0.47     |      |
| north american badger |                       | -1.94         | -1.72    | -0.71    | 0.23     | 0.41      |      |
| north american beaver |                       | -1.26         | -1.08    | -0.19    | 0.67     | 0.84      |      |
| north american mink   |                       | -1.08         | -0.93    | -0.18    | 0.56     | 0.72      |      |
| raccoon               |                       | -0.06         | 0.00     | 0.27     | 0.53     | 0.58      |      |
| red fox               |                       | -0.58         | -0.46    | 0.08     | 0.58     | 0.68      |      |
| red squirrel          |                       | -2.22         | -2.01    | -1.07    | -0.22    | -0.06     |      |
| striped skunk         |                       | -1.25         | -1.15    | -0.70    | -0.29    | -0.20     |      |
| virginia opossum      |                       | -0.36         | -0.30    | 0.00     | 0.26     | 0.30      |      |
| white tailed deer     |                       | -0.64         | -0.54    | -0.07    | 0.34     | 0.42      |      |
| woodchuck             |                       | -1.34         | -1.23    | -0.69    | -0.17    | -0.06     |      |
| imp                   |                       | armadillo     | -1.01    | -0.81    | 0.08     | 0.99      | 1.16 |
|                       |                       | bobcat        | -1.47    | -1.21    | -0.05    | 1.01      | 1.23 |
|                       |                       | cottontail sp | -0.50    | -0.33    | 0.48     | 1.31      | 1.49 |
|                       |                       | coyote        | -0.89    | -0.77    | -0.21    | 0.37      | 0.49 |
|                       | eastern chipmunk      | -1.08         | -0.89    | 0.12     | 1.07     | 1.27      |      |
|                       | elk                   | -2.25         | -1.85    | -0.28    | 0.98     | 1.19      |      |
|                       | flying squirrel sp    | -1.69         | -1.39    | -0.05    | 1.14     | 1.36      |      |
|                       | fox squirrel          | -1.27         | -1.06    | -0.07    | 0.86     | 1.07      |      |

**Table S34:** Species-specific but among-city average estimates related to a species detection probability. *(continued)*

| Parameter         | Species               | CI(0.025) | CI(0.05) | Estimate | CI(0.95) | CI(0.975) |
|-------------------|-----------------------|-----------|----------|----------|----------|-----------|
| gent X imp        | gray fox              | -0.89     | -0.68    | 0.30     | 1.29     | 1.49      |
|                   | gray squirrel sp      | 0.44      | 0.58     | 1.28     | 1.93     | 2.06      |
|                   | mule deer             | -0.71     | -0.53    | 0.33     | 1.22     | 1.40      |
|                   | north american badger | -1.58     | -1.27    | 0.15     | 1.38     | 1.66      |
|                   | north american beaver | -1.80     | -1.46    | -0.03    | 1.17     | 1.42      |
|                   | north american mink   | -1.05     | -0.83    | 0.24     | 1.26     | 1.48      |
|                   | raccoon               | -0.43     | -0.31    | 0.27     | 0.85     | 0.97      |
|                   | red fox               | -0.17     | -0.01    | 0.76     | 1.51     | 1.68      |
|                   | red squirrel          | -1.25     | -1.00    | 0.20     | 1.38     | 1.63      |
|                   | striped skunk         | -0.77     | -0.57    | 0.42     | 1.45     | 1.64      |
|                   | virginia opossum      | -0.06     | 0.09     | 0.75     | 1.36     | 1.49      |
|                   | white tailed deer     | -1.37     | -1.18    | -0.27    | 0.66     | 0.84      |
|                   | woodchuck             | -0.35     | -0.12    | 0.99     | 2.18     | 2.41      |
|                   | armadillo             | -3.08     | -2.61    | -0.92    | 0.66     | 0.99      |
|                   | bobcat                | -3.31     | -2.93    | -1.17    | 0.29     | 0.60      |
|                   | cottontail sp         | -2.98     | -2.65    | -1.23    | -0.07    | 0.17      |
|                   | coyote                | -1.68     | -1.45    | -0.41    | 0.65     | 0.89      |
|                   | eastern chipmunk      | -2.43     | -2.08    | -0.49    | 1.40     | 1.88      |
|                   | elk                   | -3.07     | -2.63    | -0.82    | 0.90     | 1.29      |
|                   | flying squirrel sp    | -3.22     | -2.74    | -0.93    | 0.75     | 1.17      |
|                   | fox squirrel          | -2.88     | -2.51    | -0.85    | 0.73     | 1.15      |
|                   | gray fox              | -3.05     | -2.65    | -0.92    | 0.69     | 1.10      |
|                   | gray squirrel sp      | -1.15     | -0.96    | -0.05    | 0.88     | 1.08      |
|                   | mule deer             | -3.26     | -2.82    | -1.02    | 0.57     | 0.95      |
|                   | north american badger | -2.86     | -2.49    | -0.76    | 0.90     | 1.31      |
|                   | north american beaver | -3.46     | -2.96    | -1.10    | 0.48     | 0.81      |
|                   | north american mink   | -3.06     | -2.68    | -0.97    | 0.56     | 0.95      |
|                   | raccoon               | -2.11     | -1.90    | -0.85    | 0.21     | 0.43      |
|                   | red fox               | -3.48     | -3.14    | -1.50    | -0.14    | 0.10      |
|                   | red squirrel          | -3.70     | -3.19    | -1.19    | 0.42     | 0.76      |
|                   | striped skunk         | -2.45     | -2.14    | -0.70    | 0.74     | 1.04      |
|                   | virginia opossum      | -2.24     | -2.05    | -1.12    | -0.20    | -0.02     |
| white tailed deer | -3.42                 | -3.02     | -1.26    | 0.20     | 0.49     |           |
| woodchuck         | -2.33                 | -2.02     | -0.57    | 0.92     | 1.27     |           |

**Table S35:** The detection-level standard deviation for city and species-specific estimate around each species among-city average.

| Parameter             | Species               | CI(0.025)     | CI(0.05) | Estimate | CI(0.95) | CI(0.975) |      |
|-----------------------|-----------------------|---------------|----------|----------|----------|-----------|------|
| intercept             | armadillo             | 0.90          | 1.03     | 1.94     | 3.50     | 3.95      |      |
|                       | bobcat                | 0.60          | 0.69     | 1.32     | 2.28     | 2.49      |      |
|                       | cottontail sp         | 0.76          | 0.83     | 1.32     | 2.00     | 2.14      |      |
|                       | coyote                | 1.04          | 1.15     | 1.80     | 2.66     | 2.89      |      |
|                       | eastern chipmunk      | 0.85          | 0.97     | 1.71     | 2.88     | 3.21      |      |
|                       | elk                   | 0.69          | 0.80     | 1.65     | 3.08     | 3.47      |      |
|                       | flying squirrel sp    | 0.44          | 0.53     | 1.09     | 1.96     | 2.19      |      |
|                       | fox squirrel          | 0.72          | 0.82     | 1.52     | 2.58     | 2.84      |      |
|                       | gray fox              | 0.37          | 0.44     | 0.91     | 1.57     | 1.72      |      |
|                       | gray squirrel sp      | 1.03          | 1.14     | 1.81     | 2.75     | 2.97      |      |
|                       | mule deer             | 0.78          | 0.87     | 1.62     | 2.84     | 3.16      |      |
|                       | north american badger | 0.61          | 0.72     | 1.50     | 2.84     | 3.21      |      |
|                       | north american beaver | 0.62          | 0.71     | 1.42     | 2.66     | 3.01      |      |
|                       | north american mink   | 0.63          | 0.74     | 1.51     | 2.84     | 3.19      |      |
|                       | raccoon               | 1.06          | 1.16     | 1.80     | 2.65     | 2.84      |      |
|                       | red fox               | 0.74          | 0.82     | 1.38     | 2.15     | 2.33      |      |
|                       | red squirrel          | 0.62          | 0.73     | 1.53     | 2.84     | 3.22      |      |
|                       | striped skunk         | 0.57          | 0.65     | 1.26     | 2.23     | 2.44      |      |
|                       | virginia opossum      | 1.28          | 1.43     | 2.36     | 3.79     | 4.15      |      |
|                       | white tailed deer     | 0.76          | 0.88     | 1.61     | 2.75     | 3.04      |      |
|                       | woodchuck             | 0.82          | 0.93     | 1.82     | 3.39     | 3.86      |      |
|                       | gent                  | armadillo     | 0.55     | 0.69     | 1.74     | 4.27      | 5.20 |
|                       |                       | bobcat        | 0.56     | 0.70     | 1.73     | 4.25      | 5.21 |
|                       |                       | cottontail sp | 0.74     | 0.83     | 1.48     | 2.50      | 2.75 |
|                       |                       | coyote        | 0.77     | 0.86     | 1.68     | 3.28      | 3.72 |
| eastern chipmunk      |                       | 0.35          | 0.44     | 1.25     | 2.93     | 3.45      |      |
| elk                   |                       | 0.26          | 0.38     | 1.37     | 3.61     | 4.34      |      |
| flying squirrel sp    |                       | 0.41          | 0.52     | 1.50     | 3.79     | 4.55      |      |
| fox squirrel          |                       | 0.47          | 0.55     | 1.20     | 2.41     | 2.76      |      |
| gray fox              |                       | 0.06          | 0.08     | 0.21     | 0.48     | 0.54      |      |
| gray squirrel sp      |                       | 0.96          | 1.08     | 1.88     | 3.13     | 3.51      |      |
| mule deer             |                       | 0.48          | 0.60     | 1.56     | 3.76     | 4.54      |      |
| north american badger |                       | 0.35          | 0.47     | 1.49     | 3.73     | 4.57      |      |
| north american beaver |                       | 0.26          | 0.33     | 1.00     | 2.46     | 2.97      |      |
| north american mink   |                       | 0.42          | 0.51     | 1.29     | 3.03     | 3.57      |      |
| raccoon               |                       | 0.98          | 1.10     | 1.91     | 3.29     | 3.61      |      |
| red fox               |                       | 0.32          | 0.37     | 0.74     | 1.32     | 1.47      |      |
| red squirrel          |                       | 0.41          | 0.54     | 1.51     | 3.86     | 4.61      |      |
| striped skunk         |                       | 0.78          | 0.91     | 1.93     | 4.39     | 5.18      |      |
| virginia opossum      |                       | 1.06          | 1.20     | 2.24     | 4.35     | 4.93      |      |
| white tailed deer     |                       | 0.52          | 0.61     | 1.33     | 2.57     | 2.87      |      |
| woodchuck             |                       | 0.59          | 0.71     | 1.61     | 3.50     | 4.08      |      |
| imp                   |                       | armadillo     | 0.12     | 0.15     | 0.39     | 0.85      | 0.97 |
|                       |                       | bobcat        | 0.04     | 0.05     | 0.13     | 0.37      | 0.45 |
|                       |                       | cottontail sp | 0.06     | 0.07     | 0.12     | 0.19      | 0.20 |
|                       |                       | coyote        | 0.22     | 0.25     | 0.46     | 0.82      | 0.91 |
|                       | eastern chipmunk      | 0.05          | 0.06     | 0.12     | 0.23     | 0.25      |      |
|                       | elk                   | 0.03          | 0.04     | 0.17     | 0.53     | 0.62      |      |
|                       | flying squirrel sp    | 0.03          | 0.05     | 0.18     | 0.53     | 0.63      |      |

**Table S35:** The detection-level standard deviation for city and species-specific estimate around each species among-city average. (continued)

| Parameter  | Species               | CI(0.025) | CI(0.05) | Estimate | CI(0.95) | CI(0.975) |
|------------|-----------------------|-----------|----------|----------|----------|-----------|
| gent X imp | fox squirrel          | 0.05      | 0.06     | 0.13     | 0.23     | 0.26      |
|            | gray fox              | 0.06      | 0.07     | 0.17     | 0.39     | 0.45      |
|            | gray squirrel sp      | 0.14      | 0.16     | 0.29     | 0.49     | 0.53      |
|            | mule deer             | 0.12      | 0.15     | 0.36     | 0.75     | 0.85      |
|            | north american badger | 0.03      | 0.04     | 0.20     | 0.61     | 0.75      |
|            | north american beaver | 0.03      | 0.03     | 0.13     | 0.44     | 0.54      |
|            | north american mink   | 0.11      | 0.13     | 0.35     | 0.80     | 0.94      |
|            | raccoon               | 0.16      | 0.18     | 0.30     | 0.48     | 0.52      |
|            | red fox               | 0.13      | 0.15     | 0.33     | 0.64     | 0.72      |
|            | red squirrel          | 0.05      | 0.06     | 0.20     | 0.55     | 0.65      |
|            | striped skunk         | 0.04      | 0.04     | 0.08     | 0.15     | 0.17      |
|            | virginia opossum      | 0.13      | 0.16     | 0.32     | 0.61     | 0.68      |
|            | white tailed deer     | 0.05      | 0.06     | 0.13     | 0.27     | 0.30      |
|            | woodchuck             | 0.05      | 0.06     | 0.14     | 0.31     | 0.36      |
|            | armadillo             | 0.01      | 0.01     | 0.04     | 0.18     | 0.23      |
|            | bobcat                | 0.02      | 0.02     | 0.11     | 0.36     | 0.43      |
|            | cottontail sp         | 0.01      | 0.02     | 0.04     | 0.15     | 0.18      |
|            | coyote                | 0.05      | 0.06     | 0.13     | 0.27     | 0.32      |
|            | eastern chipmunk      | 0.00      | 0.00     | 0.01     | 0.04     | 0.04      |
|            | elk                   | 0.00      | 0.00     | 0.07     | 0.35     | 0.44      |
|            | flying squirrel sp    | 0.01      | 0.01     | 0.10     | 0.38     | 0.46      |
|            | fox squirrel          | 0.00      | 0.00     | 0.01     | 0.05     | 0.06      |
|            | gray fox              | 0.01      | 0.01     | 0.02     | 0.05     | 0.06      |
|            | gray squirrel sp      | 0.07      | 0.08     | 0.15     | 0.29     | 0.33      |
|            | mule deer             | 0.00      | 0.01     | 0.02     | 0.09     | 0.11      |
|            | north american badger | 0.01      | 0.01     | 0.09     | 0.38     | 0.47      |
|            | north american beaver | 0.01      | 0.01     | 0.07     | 0.30     | 0.38      |
|            | north american mink   | 0.01      | 0.01     | 0.06     | 0.25     | 0.32      |
|            | raccoon               | 0.03      | 0.04     | 0.07     | 0.12     | 0.13      |
|            | red fox               | 0.01      | 0.02     | 0.04     | 0.09     | 0.10      |
|            | red squirrel          | 0.00      | 0.01     | 0.05     | 0.28     | 0.36      |
|            | striped skunk         | 0.02      | 0.03     | 0.07     | 0.22     | 0.27      |
|            | virginia opossum      | 0.07      | 0.08     | 0.16     | 0.28     | 0.31      |
|            | white tailed deer     | 0.01      | 0.01     | 0.02     | 0.04     | 0.05      |
| woodchuck  | 0.02                  | 0.02      | 0.06     | 0.16     | 0.19     |           |

**Table S36:** Species and city-specific detection parameters. Note that all of these species do not likely reside in this city (that is controlled by another level of the model).

| City               | Parameter             | Species               | CI(0.025)     | CI(0.05) | Estimate | CI(0.95) | CI(0.975) |       |
|--------------------|-----------------------|-----------------------|---------------|----------|----------|----------|-----------|-------|
| Athens, GA         | intercept             | armadillo             | -2.20         | -2.17    | -2.01    | -1.86    | -1.83     |       |
|                    |                       | bobcat                | -4.50         | -4.32    | -3.43    | -2.74    | -2.62     |       |
|                    |                       | cottontail sp         | -1.99         | -1.96    | -1.77    | -1.58    | -1.55     |       |
|                    |                       | coyote                | -2.27         | -2.23    | -2.04    | -1.86    | -1.83     |       |
|                    |                       | eastern chipmunk      | -3.76         | -3.46    | -2.08    | -0.72    | -0.44     |       |
|                    |                       | elk                   | -5.31         | -4.94    | -3.24    | -1.67    | -1.34     |       |
|                    |                       | flying squirrel sp    | -6.07         | -5.65    | -3.77    | -1.98    | -1.60     |       |
|                    |                       | fox squirrel          | -3.65         | -3.31    | -1.84    | -0.41    | -0.10     |       |
|                    |                       | gray fox              | -2.65         | -2.60    | -2.39    | -2.19    | -2.15     |       |
|                    |                       | gray squirrel sp      | -0.75         | -0.74    | -0.66    | -0.58    | -0.57     |       |
|                    |                       | mule deer             | -3.38         | -3.09    | -1.69    | -0.29    | 0.02      |       |
|                    |                       | north american badger | -5.81         | -5.44    | -3.67    | -1.99    | -1.70     |       |
|                    |                       | north american beaver | -6.20         | -5.81    | -4.11    | -2.52    | -2.23     |       |
|                    |                       | north american mink   | -6.50         | -6.14    | -4.45    | -2.96    | -2.66     |       |
|                    |                       | raccoon               | -1.71         | -1.69    | -1.58    | -1.47    | -1.45     |       |
|                    |                       | red fox               | -4.32         | -4.20    | -3.62    | -3.12    | -3.03     |       |
|                    |                       | red squirrel          | -4.26         | -3.88    | -2.32    | -0.79    | -0.47     |       |
|                    |                       | striped skunk         | -4.59         | -4.36    | -3.26    | -2.25    | -2.07     |       |
|                    |                       | virginia opossum      | -2.12         | -2.09    | -1.94    | -1.80    | -1.77     |       |
|                    |                       | white tailed deer     | -0.41         | -0.40    | -0.33    | -0.27    | -0.26     |       |
|                    |                       | woodchuck             | -4.69         | -4.36    | -2.94    | -1.63    | -1.37     |       |
|                    |                       | gent                  | armadillo     | -0.80    | -0.65    | 0.03     | 0.70      | 0.83  |
|                    |                       |                       | bobcat        | -2.41    | -2.09    | -0.57    | 0.83      | 1.17  |
|                    |                       |                       | cottontail sp | 0.90     | 1.00     | 1.49     | 2.02      | 2.12  |
|                    |                       |                       | coyote        | -2.25    | -2.08    | -1.21    | -0.47     | -0.34 |
|                    | eastern chipmunk      |                       | -2.85         | -2.45    | -0.74    | 1.02     | 1.43      |       |
|                    | elk                   |                       | -3.22         | -2.69    | -0.70    | 1.26     | 1.76      |       |
|                    | flying squirrel sp    |                       | -3.35         | -2.95    | -1.11    | 0.68     | 1.05      |       |
|                    | fox squirrel          |                       | -2.17         | -1.79    | -0.10    | 1.53     | 1.90      |       |
|                    | gray fox              |                       | -0.07         | 0.02     | 0.46     | 0.89     | 0.97      |       |
|                    | gray squirrel sp      |                       | -0.76         | -0.70    | -0.41    | -0.14    | -0.09     |       |
|                    | mule deer             |                       | -3.15         | -2.79    | -1.27    | 0.36     | 0.77      |       |
|                    | north american badger |                       | -2.97         | -2.52    | -0.74    | 1.04     | 1.42      |       |
|                    | north american beaver |                       | -2.87         | -2.35    | -0.22    | 1.67     | 2.06      |       |
|                    | north american mink   |                       | -2.33         | -1.93    | -0.20    | 1.47     | 1.85      |       |
|                    | raccoon               |                       | 0.07          | 0.13     | 0.40     | 0.68     | 0.73      |       |
|                    | red fox               |                       | 2.79          | 2.91     | 3.56     | 4.26     | 4.39      |       |
|                    | red squirrel          |                       | -3.14         | -2.72    | -1.08    | 0.61     | 1.03      |       |
|                    | striped skunk         |                       | -2.17         | -1.91    | -0.72    | 0.43     | 0.65      |       |
|                    | virginia opossum      |                       | -0.50         | -0.42    | -0.02    | 0.35     | 0.43      |       |
|                    | white tailed deer     |                       | -0.59         | -0.55    | -0.34    | -0.14    | -0.10     |       |
|                    | woodchuck             |                       | -2.51         | -2.19    | -0.70    | 0.75     | 1.11      |       |
|                    | imp                   |                       | armadillo     | -1.98    | -1.77    | -0.71    | 0.35      | 0.57  |
|                    |                       | bobcat                | -11.00        | -10.04   | -5.38    | -1.86    | -1.30     |       |
|                    |                       | cottontail sp         | -2.25         | -2.04    | -0.87    | 0.24     | 0.45      |       |
|                    |                       | coyote                | -4.54         | -4.30    | -3.12    | -2.06    | -1.84     |       |
|                    |                       | eastern chipmunk      | -6.05         | -4.81    | 0.15     | 5.18     | 6.35      |       |
| elk                |                       | -6.23                 | -5.00         | -0.40    | 4.56     | 6.07     |           |       |
| flying squirrel sp |                       | -5.86                 | -4.72         | -0.14    | 4.58     | 5.99     |           |       |

**Table S36:** Species and city-specific detection parameters. Note that all of these species do not likely reside in this city (that is controlled by another level of the model). (continued)

| City                  | Parameter  | Species               | CI(0.025) | CI(0.05) | Estimate | CI(0.95) | CI(0.975) |
|-----------------------|------------|-----------------------|-----------|----------|----------|----------|-----------|
| Bay Area, CA          | gent X imp | fox squirrel          | -6.23     | -5.03    | -0.12    | 4.91     | 5.91      |
|                       |            | gray fox              | -1.66     | -1.37    | 0.08     | 1.52     | 1.77      |
|                       |            | gray squirrel sp      | 0.20      | 0.33     | 0.95     | 1.57     | 1.68      |
|                       |            | mule deer             | -3.38     | -2.63    | 0.35     | 3.40     | 4.06      |
|                       |            | north american badger | -5.72     | -4.51    | 0.05     | 4.49     | 5.93      |
|                       |            | north american beaver | -6.89     | -5.53    | -0.15    | 5.04     | 6.56      |
|                       |            | north american mink   | -3.78     | -2.99    | 0.19     | 3.38     | 4.06      |
|                       |            | raccoon               | -0.40     | -0.25    | 0.53     | 1.29     | 1.46      |
|                       |            | red fox               | -3.64     | -3.09    | -0.36    | 2.13     | 2.65      |
|                       |            | red squirrel          | -5.16     | -4.07    | 0.22     | 4.40     | 5.50      |
|                       |            | striped skunk         | -7.33     | -6.32    | -1.43    | 3.20     | 4.11      |
|                       |            | virginia opossum      | 0.12      | 0.29     | 1.21     | 2.17     | 2.33      |
|                       |            | white tailed deer     | -5.16     | -5.05    | -4.49    | -3.94    | -3.83     |
|                       |            | woodchuck             | -5.07     | -3.87    | 1.04     | 5.73     | 6.69      |
|                       |            | armadillo             | -15.66    | -13.65   | -5.49    | -0.13    | 0.85      |
|                       |            | bobcat                | -9.10     | -7.46    | -1.32    | 4.88     | 6.59      |
|                       |            | cottontail sp         | -24.92    | -23.01   | -13.88   | -6.57    | -5.50     |
|                       |            | coyote                | -5.33     | -4.38    | 0.11     | 4.52     | 5.52      |
|                       |            | eastern chipmunk      | -21.03    | -16.77   | -0.36    | 16.25    | 20.06     |
|                       |            | elk                   | -15.70    | -10.47   | -0.80    | 8.86     | 13.01     |
|                       |            | flying squirrel sp    | -10.93    | -8.23    | -0.97    | 6.08     | 8.44      |
|                       |            | fox squirrel          | -22.63    | -18.10   | -0.90    | 15.83    | 20.95     |
|                       |            | gray fox              | -3.61     | -2.93    | 0.54     | 3.99     | 4.66      |
|                       |            | gray squirrel sp      | 3.38      | 3.72     | 5.74     | 7.80     | 8.22      |
|                       |            | mule deer             | -16.83    | -13.61   | -1.08    | 12.44    | 16.19     |
|                       |            | north american badger | -10.94    | -8.27    | -0.73    | 6.26     | 8.81      |
|                       |            | north american beaver | -11.81    | -9.20    | -1.26    | 7.02     | 9.20      |
|                       |            | north american mink   | -11.95    | -9.45    | -1.08    | 7.07     | 9.46      |
|                       |            | raccoon               | -6.99     | -6.57    | -4.18    | -1.88    | -1.46     |
|                       |            | red fox               | -16.40    | -15.36   | -10.61   | -6.35    | -5.47     |
|                       |            | red squirrel          | -13.76    | -10.84   | -1.35    | 8.44     | 11.85     |
|                       |            | striped skunk         | -9.03     | -7.37    | -0.57    | 5.94     | 7.61      |
|                       |            | virginia opossum      | -4.91     | -4.05    | -0.07    | 4.16     | 5.08      |
|                       |            | white tailed deer     | -4.62     | -4.09    | -1.55    | 0.89     | 1.31      |
|                       |            | woodchuck             | -9.78     | -8.01    | -0.47    | 6.85     | 8.67      |
|                       |            | armadillo             | -3.68     | -3.37    | -2.06    | -0.77    | -0.46     |
|                       |            | bobcat                | -5.39     | -5.18    | -4.15    | -3.21    | -3.02     |
|                       |            | cottontail sp         | -5.42     | -5.28    | -4.54    | -3.86    | -3.74     |
|                       |            | coyote                | -1.80     | -1.79    | -1.71    | -1.64    | -1.63     |
|                       |            | eastern chipmunk      | -3.73     | -3.44    | -2.05    | -0.72    | -0.41     |
|                       |            | elk                   | -5.40     | -4.96    | -3.26    | -1.69    | -1.32     |
|                       |            | flying squirrel sp    | -5.98     | -5.56    | -3.63    | -1.89    | -1.49     |
| fox squirrel          | -2.10      | -2.00                 | -1.58     | -1.18    | -1.10    |          |           |
| gray fox              | -0.13      | -0.10                 | 0.07      | 0.24     | 0.27     |          |           |
| gray squirrel sp      | -1.75      | -1.72                 | -1.63     | -1.54    | -1.52    |          |           |
| mule deer             | -2.99      | -2.76                 | -1.77     | -0.80    | -0.62    |          |           |
| north american badger | -5.87      | -5.49                 | -3.73     | -2.02    | -1.67    |          |           |
| north american beaver | -6.09      | -5.73                 | -3.98     | -2.45    | -2.15    |          |           |
| north american mink   | -6.33      | -5.96                 | -4.27     | -2.79    | -2.49    |          |           |

**Table S36:** Species and city-specific detection parameters. Note that all of these species do not likely reside in this city (that is controlled by another level of the model). (continued)

| City | Parameter         | Species               | CI(0.025)        | CI(0.05) | Estimate | CI(0.95) | CI(0.975) |       |
|------|-------------------|-----------------------|------------------|----------|----------|----------|-----------|-------|
| gent |                   | raccoon               | -1.17            | -1.16    | -1.11    | -1.05    | -1.04     |       |
|      |                   | red fox               | -4.07            | -3.90    | -3.12    | -2.50    | -2.41     |       |
|      |                   | red squirrel          | -4.22            | -3.89    | -2.30    | -0.82    | -0.50     |       |
|      |                   | striped skunk         | -2.39            | -2.36    | -2.23    | -2.10    | -2.07     |       |
|      |                   | virginia opossum      | -1.76            | -1.73    | -1.58    | -1.44    | -1.41     |       |
|      |                   | white tailed deer     | -2.22            | -2.18    | -1.95    | -1.74    | -1.69     |       |
|      |                   | woodchuck             | -4.58            | -4.30    | -2.90    | -1.60    | -1.33     |       |
|      |                   | armadillo             | -1.99            | -1.63    | -0.05    | 1.35     | 1.65      |       |
|      |                   | bobcat                | -2.36            | -2.00    | -0.51    | 0.91     | 1.22      |       |
|      |                   | cottontail sp         | -2.31            | -2.02    | -0.66    | 0.62     | 0.88      |       |
|      |                   | coyote                | -0.38            | -0.32    | -0.02    | 0.27     | 0.33      |       |
|      |                   | eastern chipmunk      | -2.91            | -2.46    | -0.75    | 0.99     | 1.41      |       |
|      |                   | elk                   | -3.16            | -2.72    | -0.69    | 1.27     | 1.72      |       |
|      |                   | flying squirrel sp    | -3.38            | -2.93    | -1.11    | 0.66     | 1.07      |       |
|      |                   | fox squirrel          | 0.53             | 0.61     | 1.09     | 1.60     | 1.70      |       |
|      |                   | gray fox              | -6.00            | -5.55    | -3.53    | -1.80    | -1.53     |       |
|      |                   | gray squirrel sp      | -0.66            | -0.59    | -0.23    | 0.12     | 0.18      |       |
|      |                   | mule deer             | -3.17            | -2.85    | -1.33    | 0.28     | 0.69      |       |
|      |                   | north american badger | -2.96            | -2.56    | -0.75    | 1.03     | 1.40      |       |
|      |                   | north american beaver | -2.86            | -2.34    | -0.19    | 1.66     | 2.08      |       |
|      |                   | north american mink   | -2.32            | -1.90    | -0.17    | 1.54     | 1.95      |       |
|      | imp               |                       | raccoon          | -0.65    | -0.62    | -0.42    | -0.23     | -0.19 |
|      |                   |                       | red fox          | -2.79    | -2.34    | -0.20    | 1.91      | 2.33  |
|      |                   |                       | red squirrel     | -3.12    | -2.78    | -1.09    | 0.67      | 1.12  |
|      |                   |                       | striped skunk    | -1.10    | -1.00    | -0.45    | 0.05      | 0.14  |
|      |                   |                       | virginia opossum | 0.32     | 0.38     | 0.65     | 0.91      | 0.97  |
|      |                   | white tailed deer     | -2.44            | -2.04    | -0.22    | 1.38     | 1.73      |       |
|      |                   | woodchuck             | -2.53            | -2.16    | -0.69    | 0.79     | 1.09      |       |
|      |                   | armadillo             | -3.61            | -2.88    | 0.05     | 3.03     | 3.80      |       |
|      |                   | bobcat                | -6.01            | -5.51    | -2.87    | -0.49    | -0.05     |       |
|      |                   | cottontail sp         | -10.97           | -10.61   | -8.77    | -7.08    | -6.76     |       |
|      |                   | coyote                | 0.05             | 0.11     | 0.40     | 0.71     | 0.76      |       |
|      |                   | eastern chipmunk      | -6.12            | -4.88    | 0.14     | 5.04     | 6.04      |       |
|      |                   | elk                   | -6.53            | -5.26    | -0.39    | 4.59     | 5.92      |       |
|      |                   | flying squirrel sp    | -5.82            | -4.48    | -0.06    | 4.77     | 6.15      |       |
|      |                   | fox squirrel          | 0.40             | 0.74     | 2.48     | 4.23     | 4.59      |       |
|      |                   | gray fox              | -0.19            | 0.04     | 1.26     | 2.52     | 2.74      |       |
|      |                   | gray squirrel sp      | -0.29            | -0.18    | 0.35     | 0.90     | 1.01      |       |
|      |                   | mule deer             | -2.66            | -2.11    | 0.38     | 2.81     | 3.29      |       |
|      |                   | north american badger | -5.44            | -4.31    | 0.22     | 4.95     | 6.36      |       |
|      |                   | north american beaver | -7.11            | -5.65    | -0.14    | 5.37     | 6.91      |       |
|      |                   | north american mink   | -3.78            | -2.98    | 0.22     | 3.41     | 4.11      |       |
|      |                   | raccoon               | -0.23            | -0.18    | 0.10     | 0.38     | 0.43      |       |
|      |                   | red fox               | -3.19            | -2.57    | 0.41     | 3.07     | 3.60      |       |
|      |                   | red squirrel          | -5.23            | -4.17    | 0.22     | 4.51     | 5.52      |       |
|      |                   | striped skunk         | 1.75             | 1.89     | 2.57     | 3.25     | 3.39      |       |
|      |                   | virginia opossum      | -0.21            | -0.08    | 0.67     | 1.43     | 1.59      |       |
|      | white tailed deer | -2.20                 | -2.08            | -1.47    | -0.88    | -0.76    |           |       |
|      | woodchuck         | -5.31                 | -4.11            | 1.04     | 5.82     | 6.86     |           |       |

**Table S36:** Species and city-specific detection parameters. Note that all of these species do not likely reside in this city (that is controlled by another level of the model). (continued)

| City       | Parameter  | Species               | CI(0.025) | CI(0.05) | Estimate | CI(0.95) | CI(0.975) |       |
|------------|------------|-----------------------|-----------|----------|----------|----------|-----------|-------|
| Boston, MA | gent X imp | armadillo             | -13.23    | -10.34   | -0.88    | 9.03     | 12.13     |       |
|            |            | bobcat                | -8.87     | -7.15    | -1.32    | 4.58     | 6.15      |       |
|            |            | cottontail sp         | -12.41    | -10.22   | -1.86    | 5.40     | 6.94      |       |
|            |            | coyote                | -1.61     | -1.23    | 0.60     | 2.42     | 2.74      |       |
|            |            | eastern chipmunk      | -20.18    | -16.22   | -0.42    | 15.66    | 19.89     |       |
|            |            | elk                   | -16.33    | -10.47   | -0.81    | 9.14     | 14.26     |       |
|            |            | flying squirrel sp    | -10.17    | -7.83    | -0.97    | 6.16     | 8.72      |       |
|            |            | fox squirrel          | -4.86     | -4.40    | -2.10    | 0.11     | 0.54      |       |
|            |            | gray fox              | -16.34    | -13.87   | -1.65    | 12.13    | 15.46     |       |
|            |            | gray squirrel sp      | 0.17      | 0.44     | 1.98     | 3.58     | 3.87      |       |
|            |            | mule deer             | -18.86    | -14.30   | -1.23    | 11.76    | 15.45     |       |
|            |            | north american badger | -11.38    | -8.24    | -0.76    | 6.49     | 9.19      |       |
|            |            | north american beaver | -11.80    | -9.27    | -1.21    | 6.69     | 9.03      |       |
|            |            | north american mink   | -11.78    | -9.38    | -0.97    | 6.98     | 9.28      |       |
|            |            | raccoon               | 0.74      | 0.92     | 1.91     | 2.89     | 3.08      |       |
|            |            | red fox               | -13.26    | -11.16   | -2.36    | 6.80     | 8.78      |       |
|            |            | red squirrel          | -13.67    | -10.42   | -1.32    | 8.67     | 12.18     |       |
|            |            | striped skunk         | -9.79     | -8.89    | -4.45    | -0.86    | -0.21     |       |
|            |            | virginia opossum      | -2.09     | -1.85    | -0.54    | 0.81     | 1.09      |       |
|            |            | white tailed deer     | -18.25    | -14.80   | -1.89    | 11.11    | 14.35     |       |
|            |            | woodchuck             | -9.66     | -8.06    | -0.48    | 6.82     | 8.51      |       |
|            |            | intercept             | armadillo | -3.70    | -3.42    | -2.08    | -0.76     | -0.49 |
|            |            |                       | bobcat    | -5.97    | -5.61    | -3.96    | -2.43     | -2.11 |
|            |            | cottontail sp         | -2.17     | -2.14    | -1.97    | -1.80    | -1.77     |       |
|            |            | coyote                | -3.21     | -3.17    | -2.92    | -2.69    | -2.65     |       |
|            |            | eastern chipmunk      | -2.35     | -2.29    | -1.98    | -1.71    | -1.66     |       |
|            |            | elk                   | -5.29     | -4.93    | -3.26    | -1.62    | -1.30     |       |
|            |            | flying squirrel sp    | -5.05     | -4.74    | -3.44    | -2.37    | -2.21     |       |
|            |            | fox squirrel          | -3.62     | -3.27    | -1.82    | -0.41    | -0.14     |       |
|            |            | gray fox              | -5.35     | -5.17    | -4.32    | -3.58    | -3.47     |       |
|            |            | gray squirrel sp      | -0.23     | -0.22    | -0.15    | -0.07    | -0.06     |       |
|            |            | mule deer             | -3.44     | -3.13    | -1.69    | -0.28    | 0.02      |       |
|            |            | north american badger | -5.84     | -5.45    | -3.68    | -2.00    | -1.61     |       |
|            |            | north american beaver | -6.14     | -5.76    | -4.00    | -2.44    | -2.14     |       |
|            |            | north american mink   | -6.57     | -6.18    | -4.61    | -3.20    | -2.94     |       |
|            |            | raccoon               | -2.14     | -2.11    | -1.99    | -1.88    | -1.86     |       |
|            |            | red fox               | -3.73     | -3.64    | -3.18    | -2.78    | -2.71     |       |
|            |            | red squirrel          | -3.99     | -3.81    | -2.94    | -2.21    | -2.07     |       |
|            |            | striped skunk         | -5.64     | -5.43    | -4.36    | -3.35    | -3.17     |       |
|            |            | virginia opossum      | -3.27     | -3.19    | -2.79    | -2.44    | -2.37     |       |
|            |            | white tailed deer     | -2.01     | -1.98    | -1.83    | -1.68    | -1.66     |       |
|            |            | woodchuck             | -4.77     | -4.55    | -3.48    | -2.62    | -2.46     |       |
|            | gent       | armadillo             | -2.00     | -1.60    | -0.06    | 1.39     | 1.69      |       |
|            |            | bobcat                | -2.22     | -1.89    | -0.40    | 1.04     | 1.36      |       |
|            |            | cottontail sp         | -2.01     | -1.92    | -1.46    | -1.03    | -0.95     |       |
|            |            | coyote                | 0.72      | 0.78     | 1.13     | 1.48     | 1.56      |       |
|            |            | eastern chipmunk      | -1.19     | -1.07    | -0.53    | -0.01    | 0.09      |       |
|            |            | elk                   | -3.15     | -2.73    | -0.69    | 1.24     | 1.69      |       |
|            |            | flying squirrel sp    | -3.36     | -2.97    | -1.17    | 0.62     | 1.01      |       |



**Table S36:** Species and city-specific detection parameters. Note that all of these species do not likely reside in this city (that is controlled by another level of the model). (continued)

| City | Parameter  | Species               | CI(0.025) | CI(0.05) | Estimate | CI(0.95) | CI(0.975) |
|------|------------|-----------------------|-----------|----------|----------|----------|-----------|
|      |            | fox squirrel          | -2.21     | -1.81    | -0.11    | 1.53     | 1.92      |
|      |            | gray fox              | -6.91     | -5.95    | -2.34    | 0.77     | 1.59      |
|      |            | gray squirrel sp      | -0.09     | -0.06    | 0.10     | 0.26     | 0.29      |
|      |            | mule deer             | -3.19     | -2.86    | -1.29    | 0.36     | 0.73      |
|      |            | north american badger | -2.96     | -2.52    | -0.72    | 1.09     | 1.52      |
|      |            | north american beaver | -2.80     | -2.30    | -0.19    | 1.70     | 2.10      |
|      |            | north american mink   | -1.99     | -1.65    | -0.11    | 1.37     | 1.66      |
|      |            | raccoon               | 0.75      | 0.79     | 1.01     | 1.21     | 1.26      |
|      |            | red fox               | -2.35     | -2.09    | -0.75    | 0.76     | 1.08      |
|      |            | red squirrel          | -2.68     | -2.40    | -1.12    | 0.12     | 0.36      |
|      |            | striped skunk         | -1.50     | -1.29    | -0.24    | 0.91     | 1.13      |
|      |            | virginia opossum      | -1.08     | -0.94    | -0.29    | 0.30     | 0.41      |
|      |            | white tailed deer     | -0.24     | -0.18    | 0.10     | 0.36     | 0.41      |
|      |            | woodchuck             | -2.65     | -2.33    | -0.98    | 0.29     | 0.53      |
|      | imp        | armadillo             | -3.62     | -2.92    | 0.09     | 3.00     | 3.80      |
|      |            | bobcat                | -6.04     | -4.93    | -0.04    | 5.16     | 6.43      |
|      |            | cottontail sp         | 5.97      | 6.16     | 7.10     | 8.09     | 8.28      |
|      |            | coyote                | -1.92     | -1.64    | -0.24    | 1.20     | 1.50      |
|      |            | eastern chipmunk      | -4.02     | -3.72    | -2.10    | -0.67    | -0.41     |
|      |            | elk                   | -6.65     | -5.23    | -0.40    | 4.73     | 6.17      |
|      |            | flying squirrel sp    | -6.18     | -4.86    | -0.18    | 4.40     | 5.54      |
|      |            | fox squirrel          | -6.04     | -5.00    | -0.02    | 4.94     | 6.01      |
|      |            | gray fox              | -1.39     | -0.86    | 2.18     | 5.60     | 6.30      |
|      |            | gray squirrel sp      | 1.53      | 1.61     | 2.03     | 2.46     | 2.54      |
|      |            | mule deer             | -3.44     | -2.71    | 0.31     | 3.32     | 3.99      |
|      |            | north american badger | -5.52     | -4.30    | 0.12     | 4.59     | 6.03      |
|      |            | north american beaver | -6.92     | -5.51    | -0.03    | 5.39     | 7.09      |
|      |            | north american mink   | -3.43     | -2.72    | 0.35     | 3.42     | 4.21      |
|      |            | raccoon               | 1.50      | 1.63     | 2.30     | 2.98     | 3.12      |
|      |            | red fox               | -1.37     | -0.95    | 1.17     | 3.37     | 3.84      |
|      |            | red squirrel          | -4.80     | -4.15    | -0.83    | 2.12     | 2.75      |
|      |            | striped skunk         | -1.51     | -0.60    | 3.42     | 7.34     | 8.14      |
|      |            | virginia opossum      | -0.71     | -0.37    | 1.28     | 3.02     | 3.40      |
|      |            | white tailed deer     | -1.27     | -1.09    | -0.17    | 0.75     | 0.93      |
|      |            | woodchuck             | -4.62     | -3.56    | 1.22     | 5.56     | 6.36      |
|      | gent X imp | armadillo             | -14.44    | -11.02   | -0.86    | 8.85     | 11.26     |
|      |            | bobcat                | -9.15     | -7.17    | -1.30    | 4.92     | 6.72      |
|      |            | cottontail sp         | -0.05     | 0.29     | 2.11     | 4.02     | 4.41      |
|      |            | coyote                | 1.37      | 1.69     | 3.41     | 5.16     | 5.52      |
|      |            | eastern chipmunk      | 0.88      | 1.35     | 3.88     | 6.49     | 6.94      |
|      |            | elk                   | -15.70    | -10.67   | -0.77    | 9.20     | 13.56     |
|      |            | flying squirrel sp    | -10.90    | -8.42    | -1.11    | 5.73     | 8.12      |
|      |            | fox squirrel          | -22.14    | -17.59   | -0.98    | 15.89    | 20.21     |
|      |            | gray fox              | -17.73    | -14.76   | -2.96    | 7.98     | 10.19     |
|      |            | gray squirrel sp      | -2.91     | -2.75    | -1.96    | -1.16    | -1.01     |
|      |            | mule deer             | -17.88    | -14.14   | -1.14    | 11.82    | 15.70     |
|      |            | north american badger | -10.72    | -8.04    | -0.76    | 6.31     | 8.91      |
|      |            | north american beaver | -11.73    | -9.29    | -1.23    | 6.85     | 9.36      |
|      |            | north american mink   | -8.85     | -7.17    | -0.49    | 6.60     | 8.17      |

**Table S36:** Species and city-specific detection parameters. Note that all of these species do not likely reside in this city (that is controlled by another level of the model). (continued)

| City                  | Parameter             | Species               | CI(0.025) | CI(0.05) | Estimate | CI(0.95) | CI(0.975) |
|-----------------------|-----------------------|-----------------------|-----------|----------|----------|----------|-----------|
| Chicago, IL           | intercept             | raccoon               | -6.49     | -6.27    | -5.15    | -4.06    | -3.85     |
|                       |                       | red fox               | -14.28    | -12.65   | -5.22    | 3.31     | 5.50      |
|                       |                       | red squirrel          | -12.76    | -10.44   | -2.13    | 5.46     | 7.65      |
|                       |                       | striped skunk         | 0.18      | 0.91     | 5.09     | 9.83     | 10.74     |
|                       |                       | virginia opossum      | -4.76     | -4.11    | -0.94    | 2.36     | 2.99      |
|                       |                       | white tailed deer     | -4.30     | -3.98    | -2.42    | -0.81    | -0.52     |
|                       |                       | woodchuck             | -9.90     | -8.38    | -1.64    | 4.21     | 5.51      |
|                       |                       | armadillo             | -3.72     | -3.43    | -2.06    | -0.76    | -0.49     |
|                       |                       | bobcat                | -5.93     | -5.54    | -3.93    | -2.42    | -2.12     |
|                       |                       | cottontail sp         | -1.64     | -1.62    | -1.56    | -1.50    | -1.49     |
|                       |                       | coyote                | -2.27     | -2.26    | -2.18    | -2.10    | -2.08     |
|                       |                       | eastern chipmunk      | -1.79     | -1.75    | -1.56    | -1.38    | -1.35     |
|                       |                       | elk                   | -5.27     | -4.87    | -3.26    | -1.65    | -1.31     |
|                       |                       | flying squirrel sp    | -4.97     | -4.79    | -3.93    | -3.21    | -3.08     |
|                       |                       | fox squirrel          | -1.98     | -1.96    | -1.88    | -1.80    | -1.79     |
|                       |                       | gray fox              | -6.30     | -5.89    | -4.06    | -2.54    | -2.29     |
|                       |                       | gray squirrel sp      | -0.71     | -0.70    | -0.67    | -0.63    | -0.63     |
|                       |                       | mule deer             | -3.43     | -3.15    | -1.69    | -0.30    | -0.01     |
|                       |                       | north american badger | -6.18     | -5.73    | -3.87    | -2.13    | -1.73     |
|                       |                       | north american beaver | -5.58     | -5.30    | -3.88    | -2.64    | -2.42     |
|                       | north american mink   | -5.09                 | -4.90     | -4.04    | -3.28    | -3.16    |           |
|                       | raccoon               | -1.19                 | -1.18     | -1.14    | -1.09    | -1.08    |           |
|                       | red fox               | -3.57                 | -3.46     | -2.93    | -2.47    | -2.40    |           |
|                       | red squirrel          | -4.47                 | -4.08     | -2.39    | -0.86    | -0.53    |           |
|                       | striped skunk         | -2.15                 | -2.13     | -2.01    | -1.89    | -1.87    |           |
|                       | virginia opossum      | -1.80                 | -1.79     | -1.72    | -1.66    | -1.65    |           |
|                       | white tailed deer     | -0.88                 | -0.87     | -0.81    | -0.74    | -0.73    |           |
|                       | woodchuck             | -5.67                 | -5.38     | -3.95    | -2.84    | -2.68    |           |
|                       | armadillo             | -1.95                 | -1.59     | -0.04    | 1.39     | 1.71     |           |
|                       | bobcat                | -2.29                 | -1.90     | -0.41    | 1.08     | 1.38     |           |
|                       | cottontail sp         | -0.01                 | 0.01      | 0.12     | 0.22     | 0.24     |           |
|                       | coyote                | -0.48                 | -0.45     | -0.27    | -0.10    | -0.07    |           |
|                       | eastern chipmunk      | -1.28                 | -1.19     | -0.73    | -0.28    | -0.19    |           |
|                       | elk                   | -3.18                 | -2.71     | -0.70    | 1.24     | 1.74     |           |
|                       | flying squirrel sp    | -3.23                 | -2.89     | -1.40    | -0.07    | 0.20     |           |
|                       | fox squirrel          | -0.56                 | -0.53     | -0.36    | -0.19    | -0.16    |           |
|                       | gray fox              | -6.60                 | -5.58     | -1.73    | 1.86     | 2.71     |           |
|                       | gray squirrel sp      | 0.09                  | 0.10      | 0.17     | 0.23     | 0.24     |           |
|                       | mule deer             | -3.21                 | -2.86     | -1.30    | 0.29     | 0.69     |           |
|                       | north american badger | -3.01                 | -2.57     | -0.76    | 1.03     | 1.44     |           |
| north american beaver | -3.19                 | -2.65                 | -0.48     | 1.41     | 1.80     |          |           |
| north american mink   | -2.31                 | -2.05                 | -0.71     | 0.47     | 0.69     |          |           |
| raccoon               | -0.27                 | -0.25                 | -0.17     | -0.09    | -0.07    |          |           |
| red fox               | -0.96                 | -0.81                 | -0.01     | 0.73     | 0.86     |          |           |
| red squirrel          | -3.21                 | -2.81                 | -1.14     | 0.64     | 1.02     |          |           |
| striped skunk         | -0.69                 | -0.64                 | -0.37     | -0.13    | -0.08    |          |           |
| virginia opossum      | 0.13                  | 0.14                  | 0.24      | 0.34     | 0.36     |          |           |
| white tailed deer     | -0.50                 | -0.48                 | -0.37     | -0.26    | -0.24    |          |           |
| woodchuck             | -2.64                 | -2.37                 | -1.05     | 0.12     | 0.37     |          |           |
|                       | gent                  |                       |           |          |          |          |           |

**Table S36:** Species and city-specific detection parameters. Note that all of these species do not likely reside in this city (that is controlled by another level of the model). (continued)

| City               | Parameter             | Species               | CI(0.025)     | CI(0.05) | Estimate | CI(0.95) | CI(0.975) |       |
|--------------------|-----------------------|-----------------------|---------------|----------|----------|----------|-----------|-------|
| Denver, CO         | imp                   | armadillo             | -3.48         | -2.85    | 0.07     | 3.11     | 3.85      |       |
|                    |                       | bobcat                | -6.27         | -5.03    | -0.04    | 5.25     | 6.52      |       |
|                    |                       | cottontail sp         | 0.98          | 1.04     | 1.39     | 1.73     | 1.81      |       |
|                    |                       | coyote                | -0.44         | -0.36    | 0.07     | 0.49     | 0.57      |       |
|                    |                       | eastern chipmunk      | -0.45         | -0.28    | 0.58     | 1.44     | 1.62      |       |
|                    |                       | elk                   | -6.31         | -5.04    | -0.34    | 4.63     | 6.19      |       |
|                    |                       | flying squirrel sp    | -6.42         | -5.90    | -3.16    | -0.64    | -0.21     |       |
|                    |                       | fox squirrel          | -2.73         | -2.65    | -2.27    | -1.89    | -1.82     |       |
|                    |                       | gray fox              | -4.03         | -3.26    | 0.44     | 4.25     | 5.14      |       |
|                    |                       | gray squirrel sp      | 1.82          | 1.86     | 2.04     | 2.22     | 2.26      |       |
|                    |                       | mule deer             | -3.35         | -2.65    | 0.37     | 3.37     | 4.08      |       |
|                    |                       | north american badger | -5.43         | -4.12    | 0.31     | 4.90     | 6.30      |       |
|                    |                       | north american beaver | -8.93         | -7.35    | -1.13    | 3.43     | 4.48      |       |
|                    |                       | north american mink   | -3.06         | -2.47    | 0.20     | 3.10     | 3.79      |       |
|                    |                       | raccoon               | -0.06         | -0.01    | 0.23     | 0.47     | 0.52      |       |
|                    |                       | red fox               | -2.28         | -1.79    | 0.93     | 3.69     | 4.31      |       |
|                    |                       | red squirrel          | -5.08         | -4.03    | 0.29     | 4.46     | 5.53      |       |
|                    |                       | striped skunk         | 0.80          | 0.95     | 1.76     | 2.58     | 2.73      |       |
|                    |                       | virginia opossum      | 0.71          | 0.78     | 1.13     | 1.49     | 1.55      |       |
|                    |                       | white tailed deer     | 0.31          | 0.36     | 0.64     | 0.92     | 0.98      |       |
|                    |                       | woodchuck             | -3.63         | -2.83    | 0.83     | 4.50     | 5.24      |       |
|                    |                       | gent X imp            | armadillo     | -13.49   | -10.73   | -1.02    | 8.68      | 11.46 |
|                    |                       |                       | bobcat        | -9.26    | -7.50    | -1.24    | 5.21      | 7.14  |
|                    |                       |                       | cottontail sp | -0.87    | -0.77    | -0.25    | 0.27      | 0.38  |
|                    | coyote                |                       | -2.85         | -2.65    | -1.60    | -0.56    | -0.37     |       |
|                    | eastern chipmunk      |                       | -6.54         | -6.11    | -3.76    | -1.37    | -0.94     |       |
|                    | elk                   |                       | -15.49        | -10.59   | -0.80    | 8.87     | 13.61     |       |
|                    | flying squirrel sp    |                       | -8.34         | -6.68    | -0.79    | 4.89     | 6.48      |       |
|                    | fox squirrel          |                       | 1.60          | 1.73     | 2.50     | 3.28     | 3.42      |       |
|                    | gray fox              |                       | -15.11        | -12.18   | -0.90    | 10.75    | 13.83     |       |
|                    | gray squirrel sp      |                       | -1.35         | -1.30    | -0.99    | -0.68    | -0.62     |       |
|                    | mule deer             |                       | -17.46        | -13.79   | -0.99    | 11.99    | 16.00     |       |
|                    | north american badger |                       | -10.51        | -7.79    | -0.74    | 6.56     | 9.47      |       |
|                    | north american beaver |                       | -12.09        | -9.49    | -1.56    | 6.00     | 8.26      |       |
|                    | north american mink   |                       | -10.66        | -8.76    | -1.33    | 5.30     | 7.33      |       |
|                    | raccoon               |                       | -3.01         | -2.92    | -2.44    | -1.97    | -1.88     |       |
|                    | red fox               |                       | -7.20         | -6.41    | -2.22    | 1.84     | 2.76      |       |
|                    | red squirrel          |                       | -13.99        | -10.72   | -1.29    | 8.57     | 12.00     |       |
|                    | striped skunk         |                       | -3.99         | -3.68    | -2.14    | -0.68    | -0.43     |       |
|                    | virginia opossum      |                       | -2.45         | -2.34    | -1.80    | -1.27    | -1.17     |       |
|                    | white tailed deer     |                       | -1.09         | -0.98    | -0.39    | 0.20     | 0.31      |       |
|                    | woodchuck             |                       | -10.42        | -8.88    | -2.39    | 3.44     | 4.62      |       |
|                    | intercept             |                       | armadillo     | -3.69    | -3.41    | -2.07    | -0.77     | -0.53 |
|                    |                       | bobcat                | -6.29         | -6.00    | -4.63    | -3.33    | -3.12     |       |
|                    |                       | cottontail sp         | -2.07         | -2.02    | -1.77    | -1.53    | -1.48     |       |
|                    |                       | coyote                | -3.60         | -3.53    | -3.22    | -2.93    | -2.88     |       |
| eastern chipmunk   |                       | -3.77                 | -3.47         | -2.06    | -0.72    | -0.43    |           |       |
| elk                |                       | -4.89                 | -4.66         | -3.66    | -2.84    | -2.70    |           |       |
| flying squirrel sp |                       | -5.84                 | -5.42         | -3.59    | -1.89    | -1.51    |           |       |

**Table S36:** Species and city-specific detection parameters. Note that all of these species do not likely reside in this city (that is controlled by another level of the model). (continued)

| City | Parameter | Species               | CI(0.025) | CI(0.05) | Estimate | CI(0.95) | CI(0.975) |
|------|-----------|-----------------------|-----------|----------|----------|----------|-----------|
|      |           | fox squirrel          | -0.91     | -0.89    | -0.81    | -0.73    | -0.71     |
|      |           | gray fox              | -5.74     | -5.27    | -3.14    | -1.22    | -0.83     |
|      |           | gray squirrel sp      | -2.31     | -2.06    | -0.78    | 0.49     | 0.76      |
|      |           | mule deer             | -1.58     | -1.53    | -1.26    | -0.99    | -0.93     |
|      |           | north american badger | -6.07     | -5.66    | -3.85    | -2.17    | -1.81     |
|      |           | north american beaver | -5.60     | -5.32    | -4.04    | -2.99    | -2.81     |
|      |           | north american mink   | -6.65     | -6.24    | -4.55    | -3.02    | -2.70     |
|      |           | raccoon               | -1.77     | -1.74    | -1.60    | -1.46    | -1.44     |
|      |           | red fox               | -3.61     | -3.54    | -3.22    | -2.92    | -2.88     |
|      |           | red squirrel          | -4.42     | -4.17    | -2.94    | -1.90    | -1.71     |
|      |           | striped skunk         | -3.13     | -3.04    | -2.61    | -2.22    | -2.15     |
|      |           | virginia opossum      | -4.02     | -3.75    | -2.59    | -1.72    | -1.56     |
|      |           | white tailed deer     | -4.41     | -4.04    | -2.53    | -1.32    | -1.09     |
|      |           | woodchuck             | -4.56     | -4.27    | -2.91    | -1.62    | -1.34     |
|      | gent      | armadillo             | -1.95     | -1.58    | -0.05    | 1.41     | 1.73      |
|      |           | bobcat                | -1.72     | -1.48    | -0.29    | 0.83     | 1.04      |
|      |           | cottontail sp         | -1.65     | -1.57    | -1.11    | -0.68    | -0.59     |
|      |           | coyote                | -0.04     | 0.03     | 0.39     | 0.76     | 0.83      |
|      |           | eastern chipmunk      | -2.90     | -2.49    | -0.76    | 0.95     | 1.35      |
|      |           | elk                   | -3.53     | -2.99    | -1.06    | 0.83     | 1.25      |
|      |           | flying squirrel sp    | -3.30     | -2.89    | -1.11    | 0.71     | 1.13      |
|      |           | fox squirrel          | 0.04      | 0.07     | 0.21     | 0.35     | 0.37      |
|      |           | gray fox              | -5.95     | -5.06    | -0.95    | 3.02     | 3.82      |
|      |           | gray squirrel sp      | -1.87     | -1.60    | -0.37    | 0.90     | 1.16      |
|      |           | mule deer             | -2.16     | -2.07    | -1.55    | -1.08    | -1.00     |
|      |           | north american badger | -3.06     | -2.62    | -0.77    | 0.98     | 1.37      |
|      |           | north american beaver | -3.32     | -2.78    | -0.57    | 1.31     | 1.68      |
|      |           | north american mink   | -2.46     | -2.05    | -0.32    | 1.34     | 1.72      |
|      |           | raccoon               | -1.38     | -1.32    | -0.98    | -0.66    | -0.59     |
|      |           | red fox               | 0.50      | 0.57     | 0.95     | 1.33     | 1.41      |
|      |           | red squirrel          | -3.40     | -3.01    | -1.33    | 0.38     | 0.78      |
|      |           | striped skunk         | -2.48     | -2.28    | -1.41    | -0.68    | -0.55     |
|      |           | virginia opossum      | -1.74     | -1.46    | -0.19    | 1.00     | 1.22      |
|      |           | white tailed deer     | -2.28     | -1.96    | -0.39    | 1.02     | 1.28      |
|      |           | woodchuck             | -2.44     | -2.14    | -0.69    | 0.79     | 1.10      |
|      | imp       | armadillo             | -3.56     | -2.86    | 0.07     | 3.07     | 3.85      |
|      |           | bobcat                | -3.55     | -2.57    | 1.72     | 6.91     | 8.15      |
|      |           | cottontail sp         | -2.15     | -1.86    | -0.38    | 1.16     | 1.45      |
|      |           | coyote                | -3.71     | -3.36    | -1.61    | 0.08     | 0.38      |
|      |           | eastern chipmunk      | -6.09     | -4.97    | 0.11     | 5.06     | 6.25      |
|      |           | elk                   | -5.57     | -4.80    | -1.24    | 1.93     | 2.55      |
|      |           | flying squirrel sp    | -5.82     | -4.58    | -0.10    | 4.64     | 5.89      |
|      |           | fox squirrel          | 3.95      | 4.06     | 4.62     | 5.20     | 5.33      |
|      |           | gray fox              | -4.98     | -3.97    | 0.37     | 4.69     | 5.87      |
|      |           | gray squirrel sp      | -2.66     | -1.99    | 1.29     | 4.49     | 5.14      |
|      |           | mule deer             | -0.37     | -0.09    | 1.34     | 2.85     | 3.15      |
|      |           | north american badger | -5.52     | -4.12    | 0.20     | 4.78     | 6.03      |
|      |           | north american beaver | -6.84     | -5.46    | -0.11    | 4.98     | 6.19      |
|      |           | north american mink   | -3.60     | -2.92    | 0.23     | 3.37     | 4.14      |

**Table S36:** Species and city-specific detection parameters. Note that all of these species do not likely reside in this city (that is controlled by another level of the model). (continued)

| City                  | Parameter  | Species               | CI(0.025) | CI(0.05)         | Estimate | CI(0.95) | CI(0.975) |       |       |
|-----------------------|------------|-----------------------|-----------|------------------|----------|----------|-----------|-------|-------|
|                       | gent X imp | raccoon               | -3.74     | -3.46            | -2.14    | -0.89    | -0.67     |       |       |
|                       |            | red fox               | -2.17     | -1.77            | 0.30     | 2.32     | 2.71      |       |       |
|                       |            | red squirrel          | -5.72     | -4.76            | -0.76    | 2.50     | 3.12      |       |       |
|                       |            | striped skunk         | -0.82     | -0.22            | 2.89     | 6.33     | 7.01      |       |       |
|                       |            | virginia opossum      | -3.50     | -2.78            | 0.49     | 3.59     | 4.24      |       |       |
|                       |            | white tailed deer     | -2.37     | -1.63            | 2.31     | 7.31     | 8.50      |       |       |
|                       |            | woodchuck             | -4.91     | -3.78            | 1.02     | 5.73     | 6.89      |       |       |
|                       |            | armadillo             | -12.94    | -10.56           | -0.94    | 8.86     | 11.79     |       |       |
|                       |            | bobcat                | -7.51     | -6.15            | -0.83    | 5.08     | 6.69      |       |       |
|                       |            | cottontail sp         | -4.02     | -3.39            | -0.24    | 3.01     | 3.71      |       |       |
|                       |            | coyote                | -2.30     | -1.90            | 0.26     | 2.42     | 2.81      |       |       |
|                       |            | eastern chipmunk      | -21.27    | -16.70           | -0.30    | 15.89    | 20.84     |       |       |
|                       |            | elk                   | -12.26    | -8.72            | -0.31    | 10.78    | 16.88     |       |       |
|                       |            | flying squirrel sp    | -10.43    | -7.86            | -0.89    | 6.11     | 8.93      |       |       |
|                       |            | fox squirrel          | -4.86     | -4.63            | -3.51    | -2.38    | -2.16     |       |       |
|                       |            | gray fox              | -16.15    | -13.12           | -1.04    | 11.11    | 14.14     |       |       |
|                       |            | gray squirrel sp      | -5.46     | -4.52            | 0.00     | 4.39     | 5.28      |       |       |
|                       |            | mule deer             | -7.33     | -6.88            | -4.40    | -2.11    | -1.63     |       |       |
|                       |            | north american badger | -10.74    | -8.10            | -0.78    | 6.43     | 9.20      |       |       |
|                       |            | north american beaver | -12.34    | -9.45            | -1.51    | 5.91     | 7.82      |       |       |
|                       |            | north american mink   | -11.98    | -9.66            | -1.08    | 6.79     | 9.01      |       |       |
|                       |            | raccoon               | 2.12      | 2.51             | 4.59     | 6.72     | 7.15      |       |       |
|                       |            | red fox               | -1.70     | -1.24            | 1.17     | 3.65     | 4.17      |       |       |
|                       |            | red squirrel          | -15.00    | -11.46           | -1.64    | 7.77     | 10.84     |       |       |
|                       |            | striped skunk         | -7.31     | -6.31            | -1.61    | 2.94     | 3.91      |       |       |
|                       |            | virginia opossum      | -6.61     | -5.70            | -1.22    | 3.22     | 4.18      |       |       |
|                       |            | white tailed deer     | -8.44     | -6.92            | 1.07     | 9.79     | 11.62     |       |       |
|                       |            | woodchuck             | -9.83     | -7.98            | -0.55    | 6.91     | 8.72      |       |       |
|                       |            | Houston, TX           | intercept | armadillo        | -1.83    | -1.80    | -1.63     | -1.47 | -1.44 |
|                       |            |                       |           | bobcat           | -4.60    | -4.44    | -3.72     | -3.03 | -2.91 |
|                       |            |                       |           | cottontail sp    | -1.09    | -1.07    | -0.96     | -0.85 | -0.83 |
|                       |            |                       |           | coyote           | -3.66    | -3.60    | -3.28     | -2.98 | -2.94 |
|                       |            |                       |           | eastern chipmunk | -3.71    | -3.43    | -2.06     | -0.70 | -0.44 |
| elk                   | -5.34      |                       |           | -4.95            | -3.26    | -1.64    | -1.32     |       |       |
| flying squirrel sp    | -6.10      |                       |           | -5.65            | -3.75    | -1.98    | -1.61     |       |       |
| fox squirrel          | -1.42      |                       |           | -1.40            | -1.30    | -1.20    | -1.18     |       |       |
| gray fox              | -3.78      |                       |           | -3.64            | -2.89    | -2.22    | -2.10     |       |       |
| gray squirrel sp      | -1.57      |                       |           | -1.55            | -1.45    | -1.36    | -1.34     |       |       |
| mule deer             | -3.50      |                       |           | -3.17            | -1.70    | -0.30    | 0.03      |       |       |
| north american badger | -5.91      |                       |           | -5.49            | -3.72    | -2.05    | -1.72     |       |       |
| north american beaver | -6.09      |                       |           | -5.75            | -4.04    | -2.48    | -2.15     |       |       |
| north american mink   | -6.26      |                       |           | -5.92            | -4.26    | -2.80    | -2.48     |       |       |
| raccoon               | -1.77      |                       |           | -1.74            | -1.62    | -1.50    | -1.48     |       |       |
| red fox               | -4.19      |                       |           | -3.93            | -2.41    | -0.93    | -0.64     |       |       |
| red squirrel          | -4.21      |                       |           | -3.85            | -2.30    | -0.80    | -0.47     |       |       |
| striped skunk         | -2.82      |                       |           | -2.67            | -1.94    | -1.21    | -1.07     |       |       |
| virginia opossum      | -1.48      |                       |           | -1.47            | -1.37    | -1.28    | -1.26     |       |       |
| white tailed deer     | -1.76      |                       |           | -1.67            | -1.20    | -0.75    | -0.67     |       |       |
| woodchuck             | -4.63      | -4.32                 | -2.91     | -1.60            | -1.32    |          |           |       |       |

**Table S36:** Species and city-specific detection parameters. Note that all of these species do not likely reside in this city (that is controlled by another level of the model). (continued)

| City                  | Parameter | Species               | CI(0.025) | CI(0.05)              | Estimate | CI(0.95) | CI(0.975) |       |       |
|-----------------------|-----------|-----------------------|-----------|-----------------------|----------|----------|-----------|-------|-------|
| gent                  |           | armadillo             | -1.99     | -1.69                 | -0.24    | 1.02     | 1.29      |       |       |
|                       |           | bobcat                | -1.88     | -1.65                 | -0.60    | 0.37     | 0.55      |       |       |
|                       |           | cottontail sp         | -0.73     | -0.68                 | -0.39    | -0.12    | -0.07     |       |       |
|                       |           | coyote                | -1.33     | -1.16                 | -0.30    | 0.45     | 0.59      |       |       |
|                       |           | eastern chipmunk      | -2.87     | -2.47                 | -0.71    | 1.05     | 1.49      |       |       |
|                       |           | elk                   | -3.28     | -2.80                 | -0.71    | 1.28     | 1.72      |       |       |
|                       |           | flying squirrel sp    | -3.38     | -2.94                 | -1.12    | 0.68     | 1.07      |       |       |
|                       |           | fox squirrel          | -2.23     | -2.06                 | -1.35    | -0.74    | -0.63     |       |       |
|                       |           | gray fox              | -6.16     | -5.19                 | -1.20    | 2.80     | 3.77      |       |       |
|                       |           | gray squirrel sp      | -1.72     | -1.60                 | -1.02    | -0.45    | -0.34     |       |       |
|                       |           | mule deer             | -3.15     | -2.78                 | -1.30    | 0.30     | 0.66      |       |       |
|                       |           | north american badger | -2.97     | -2.55                 | -0.73    | 1.05     | 1.47      |       |       |
|                       |           | north american beaver | -2.91     | -2.35                 | -0.18    | 1.73     | 2.13      |       |       |
|                       |           | north american mink   | -2.35     | -1.96                 | -0.18    | 1.54     | 1.94      |       |       |
|                       |           | raccoon               | 0.19      | 0.25                  | 0.55     | 0.83     | 0.88      |       |       |
|                       |           | red fox               | -2.50     | -2.02                 | 0.03     | 2.03     | 2.44      |       |       |
|                       |           | red squirrel          | -3.15     | -2.80                 | -1.10    | 0.62     | 1.03      |       |       |
|                       |           | striped skunk         | -2.49     | -2.20                 | -0.81    | 0.50     | 0.76      |       |       |
|                       |           | virginia opossum      | -0.29     | -0.24                 | 0.03     | 0.29     | 0.34      |       |       |
|                       |           | white tailed deer     | -2.24     | -1.85                 | -0.16    | 1.41     | 1.71      |       |       |
|                       |           | woodchuck             | -2.49     | -2.18                 | -0.70    | 0.72     | 1.07      |       |       |
|                       |           | imp                   |           | armadillo             | -0.87    | -0.70    | 0.19      | 1.04  | 1.19  |
|                       |           |                       |           | bobcat                | -2.66    | -2.14    | 0.61      | 3.54  | 4.08  |
|                       |           |                       |           | cottontail sp         | -1.61    | -1.47    | -0.70     | 0.04  | 0.19  |
|                       |           |                       |           | coyote                | -2.38    | -2.12    | -0.78     | 0.53  | 0.78  |
|                       |           |                       |           | eastern chipmunk      | -5.92    | -4.95    | 0.09      | 5.15  | 6.31  |
|                       |           |                       |           | elk                   | -6.36    | -5.00    | -0.32     | 4.62  | 6.06  |
|                       |           |                       |           | flying squirrel sp    | -5.83    | -4.57    | -0.09     | 4.49  | 5.89  |
|                       |           |                       |           | fox squirrel          | 2.47     | 2.57     | 3.11      | 3.67  | 3.79  |
|                       |           |                       |           | gray fox              | -5.27    | -4.51    | -0.67     | 2.80  | 3.44  |
|                       |           |                       |           | gray squirrel sp      | 0.95     | 1.04     | 1.56      | 2.10  | 2.19  |
|                       |           |                       |           | mule deer             | -3.43    | -2.74    | 0.36      | 3.42  | 4.12  |
|                       |           |                       |           | north american badger | -5.71    | -4.35    | 0.14      | 4.87  | 6.27  |
| north american beaver | -6.99     |                       |           | -5.54                 | -0.09    | 5.19     | 6.72      |       |       |
| north american mink   | -3.78     |                       |           | -2.98                 | 0.23     | 3.48     | 4.24      |       |       |
| raccoon               | 0.50      |                       |           | 0.62                  | 1.32     | 2.04     | 2.17      |       |       |
| red fox               | -3.17     |                       |           | -2.44                 | 0.77     | 3.84     | 4.50      |       |       |
| red squirrel          | -5.28     |                       |           | -4.06                 | 0.20     | 4.38     | 5.47      |       |       |
| striped skunk         | -3.30     |                       |           | -2.58                 | 1.02     | 5.04     | 5.88      |       |       |
| virginia opossum      | -0.43     |                       |           | -0.32                 | 0.19     | 0.70     | 0.79      |       |       |
| white tailed deer     | -1.68     |                       |           | -1.32                 | 0.92     | 3.23     | 3.74      |       |       |
| woodchuck             | -5.26     |                       |           | -4.03                 | 1.08     | 5.76     | 6.77      |       |       |
| gent X imp            |           |                       |           | armadillo             | -5.67    | -4.55    | 0.30      | 4.71  | 5.67  |
|                       |           |                       |           | bobcat                | -4.74    | -4.01    | -0.24     | 4.28  | 5.36  |
|                       |           |                       |           | cottontail sp         | -0.68    | -0.46    | 0.80      | 2.06  | 2.32  |
|                       |           |                       |           | coyote                | -1.40    | -0.84    | 1.95      | 4.95  | 5.62  |
|                       |           |                       |           | eastern chipmunk      | -20.50   | -16.47   | -0.30     | 15.68 | 19.65 |
|                       |           |                       |           | elk                   | -16.26   | -10.74   | -0.85     | 8.73  | 13.54 |
|                       |           | flying squirrel sp    | -10.40    | -7.75                 | -0.92    | 6.33     | 8.78      |       |       |

**Table S36:** Species and city-specific detection parameters. Note that all of these species do not likely reside in this city (that is controlled by another level of the model). (continued)

| City                  | Parameter             | Species               | CI(0.025) | CI(0.05) | Estimate | CI(0.95) | CI(0.975) |
|-----------------------|-----------------------|-----------------------|-----------|----------|----------|----------|-----------|
| Indianapolis, IN      | intercept             | fox squirrel          | -1.21     | -0.73    | 1.73     | 4.60     | 5.27      |
|                       |                       | gray fox              | -16.10    | -13.30   | -0.99    | 11.69    | 14.30     |
|                       |                       | gray squirrel sp      | 0.59      | 1.02     | 3.31     | 5.74     | 6.24      |
|                       |                       | mule deer             | -17.74    | -13.80   | -1.09    | 12.05    | 15.60     |
|                       |                       | north american badger | -10.71    | -8.09    | -0.73    | 6.66     | 9.49      |
|                       |                       | north american beaver | -11.64    | -9.18    | -1.25    | 6.93     | 9.32      |
|                       |                       | north american mink   | -12.32    | -9.51    | -1.05    | 7.45     | 10.09     |
|                       |                       | raccoon               | -0.05     | 0.17     | 1.43     | 2.74     | 2.99      |
|                       |                       | red fox               | -12.43    | -10.35   | -1.60    | 7.23     | 9.26      |
|                       |                       | red squirrel          | -14.57    | -11.14   | -1.33    | 8.17     | 11.60     |
|                       |                       | striped skunk         | -9.45     | -7.59    | -0.37    | 6.76     | 8.71      |
|                       |                       | virginia opossum      | -0.38     | -0.19    | 0.84     | 1.93     | 2.16      |
|                       |                       | white tailed deer     | -16.53    | -13.44   | 0.17     | 14.52    | 17.40     |
|                       |                       | woodchuck             | -9.95     | -8.18    | -0.48    | 6.97     | 8.97      |
|                       |                       | armadillo             | -3.72     | -3.40    | -2.06    | -0.77    | -0.46     |
|                       |                       | bobcat                | -6.66     | -6.22    | -4.20    | -2.54    | -2.20     |
|                       |                       | cottontail sp         | -1.34     | -1.33    | -1.28    | -1.22    | -1.21     |
|                       |                       | coyote                | -2.98     | -2.95    | -2.82    | -2.69    | -2.67     |
|                       |                       | eastern chipmunk      | -2.90     | -2.82    | -2.47    | -2.16    | -2.10     |
|                       |                       | elk                   | -5.26     | -4.91    | -3.24    | -1.64    | -1.33     |
|                       | flying squirrel sp    | -6.48                 | -6.02     | -4.05    | -2.23    | -1.91    |           |
|                       | fox squirrel          | -0.81                 | -0.80     | -0.76    | -0.71    | -0.71    |           |
|                       | gray fox              | -6.11                 | -5.64     | -3.34    | -1.36    | -0.91    |           |
|                       | gray squirrel sp      | -2.25                 | -2.22     | -2.05    | -1.88    | -1.85    |           |
|                       | mule deer             | -3.41                 | -3.13     | -1.70    | -0.30    | 0.02     |           |
|                       | north american badger | -5.88                 | -5.49     | -3.89    | -2.49    | -2.23    |           |
|                       | north american beaver | -5.06                 | -4.84     | -3.77    | -2.82    | -2.66    |           |
|                       | north american mink   | -5.78                 | -5.59     | -4.64    | -3.75    | -3.61    |           |
|                       | raccoon               | -0.62                 | -0.61     | -0.57    | -0.53    | -0.52    |           |
|                       | red fox               | -3.03                 | -2.99     | -2.81    | -2.63    | -2.60    |           |
|                       | red squirrel          | -2.26                 | -2.23     | -2.07    | -1.91    | -1.89    |           |
|                       | striped skunk         | -6.34                 | -6.02     | -4.45    | -2.93    | -2.65    |           |
|                       | virginia opossum      | -1.66                 | -1.64     | -1.59    | -1.53    | -1.52    |           |
|                       | white tailed deer     | -2.01                 | -1.99     | -1.89    | -1.80    | -1.78    |           |
|                       | woodchuck             | -3.66                 | -3.57     | -3.13    | -2.75    | -2.68    |           |
|                       | gent                  | armadillo             | -1.95     | -1.56    | -0.06    | 1.36     | 1.67      |
|                       | bobcat                | -2.29                 | -1.92     | -0.45    | 0.97     | 1.29     |           |
|                       | cottontail sp         | -0.30                 | -0.27     | -0.14    | -0.02    | 0.00     |           |
|                       | coyote                | 0.05                  | 0.09      | 0.31     | 0.52     | 0.56     |           |
|                       | eastern chipmunk      | -0.62                 | -0.51     | 0.01     | 0.52     | 0.61     |           |
| elk                   | -3.19                 | -2.72                 | -0.71     | 1.32     | 1.81     |          |           |
| flying squirrel sp    | -3.39                 | -2.97                 | -1.18     | 0.56     | 0.97     |          |           |
| fox squirrel          | 0.44                  | 0.46                  | 0.54      | 0.62     | 0.63     |          |           |
| gray fox              | -5.80                 | -4.92                 | -0.98     | 2.92     | 3.87     |          |           |
| gray squirrel sp      | -1.28                 | -1.18                 | -0.71     | -0.28    | -0.21    |          |           |
| mule deer             | -3.15                 | -2.78                 | -1.29     | 0.33     | 0.70     |          |           |
| north american badger | -3.12                 | -2.67                 | -0.84     | 0.91     | 1.31     |          |           |
| north american beaver | -2.45                 | -2.10                 | -0.55     | 0.74     | 0.98     |          |           |
| north american mink   | -0.04                 | 0.12                  | 1.12      | 2.15     | 2.35     |          |           |

**Table S36:** Species and city-specific detection parameters. Note that all of these species do not likely reside in this city (that is controlled by another level of the model). (continued)

| City | Parameter         | Species               | CI(0.025) | CI(0.05) | Estimate | CI(0.95) | CI(0.975) |
|------|-------------------|-----------------------|-----------|----------|----------|----------|-----------|
|      | imp               | raccoon               | 0.47      | 0.48     | 0.56     | 0.64     | 0.65      |
|      |                   | red fox               | -0.21     | -0.14    | 0.20     | 0.53     | 0.59      |
|      |                   | red squirrel          | -2.72     | -2.51    | -1.60    | -0.79    | -0.67     |
|      |                   | striped skunk         | -2.50     | -2.22    | -0.90    | 0.33     | 0.57      |
|      |                   | virginia opossum      | 0.02      | 0.04     | 0.15     | 0.27     | 0.29      |
|      |                   | white tailed deer     | -0.12     | -0.08    | 0.12     | 0.31     | 0.34      |
|      |                   | woodchuck             | -1.00     | -0.89    | -0.31    | 0.30     | 0.41      |
|      |                   | armadillo             | -3.48     | -2.80    | 0.07     | 3.02     | 3.70      |
|      |                   | bobcat                | -5.84     | -4.66    | 0.22     | 5.60     | 6.87      |
|      |                   | cottontail sp         | -1.13     | -1.06    | -0.71    | -0.37    | -0.31     |
|      |                   | coyote                | -1.27     | -1.14    | -0.44    | 0.27     | 0.40      |
|      |                   | eastern chipmunk      | -0.87     | -0.43    | 2.02     | 4.79     | 5.35      |
|      |                   | elk                   | -6.39     | -5.05    | -0.42    | 4.58     | 6.13      |
|      |                   | flying squirrel sp    | -5.66     | -4.54    | -0.07    | 4.74     | 6.06      |
|      |                   | fox squirrel          | -0.43     | -0.38    | -0.13    | 0.14     | 0.19      |
|      |                   | gray fox              | -5.07     | -4.05    | 0.39     | 4.76     | 5.80      |
|      |                   | gray squirrel sp      | 1.59      | 1.80     | 2.86     | 3.97     | 4.19      |
|      |                   | mule deer             | -3.30     | -2.70    | 0.34     | 3.40     | 4.17      |
|      |                   | north american badger | -4.28     | -3.20    | 0.71     | 5.56     | 7.05      |
|      |                   | north american beaver | -0.32     | 0.25     | 3.45     | 7.08     | 7.75      |
|      |                   | north american mink   | -2.17     | -1.66    | 0.88     | 3.44     | 3.98      |
|      |                   | raccoon               | 0.29      | 0.33     | 0.57     | 0.81     | 0.86      |
|      |                   | red fox               | -1.01     | -0.81    | 0.19     | 1.17     | 1.36      |
|      |                   | red squirrel          | 1.03      | 1.36     | 3.01     | 4.92     | 5.31      |
|      |                   | striped skunk         | -4.99     | -4.25    | 0.14     | 4.85     | 5.82      |
|      |                   | virginia opossum      | 0.99      | 1.06     | 1.38     | 1.71     | 1.77      |
|      | white tailed deer | -1.43                 | -1.33     | -0.79    | -0.27    | -0.17    |           |
|      | woodchuck         | -0.49                 | -0.05     | 2.14     | 4.17     | 4.54     |           |
|      | gent X imp        | armadillo             | -13.51    | -10.69   | -0.93    | 9.06     | 12.14     |
|      |                   | bobcat                | -8.94     | -7.29    | -1.23    | 4.98     | 6.63      |
|      |                   | cottontail sp         | 1.05      | 1.17     | 1.79     | 2.43     | 2.55      |
|      |                   | coyote                | -1.99     | -1.77    | -0.64    | 0.53     | 0.77      |
|      |                   | eastern chipmunk      | -7.46     | -6.64    | -2.96    | 0.32     | 0.95      |
|      |                   | elk                   | -16.18    | -10.74   | -0.86    | 8.96     | 13.99     |
|      |                   | flying squirrel sp    | -10.98    | -8.25    | -0.99    | 5.76     | 8.15      |
|      |                   | fox squirrel          | -1.27     | -1.19    | -0.77    | -0.35    | -0.27     |
|      |                   | gray fox              | -16.16    | -13.26   | -1.14    | 10.94    | 13.67     |
|      |                   | gray squirrel sp      | -7.66     | -7.12    | -4.23    | -1.83    | -1.35     |
|      |                   | mule deer             | -17.78    | -13.70   | -1.09    | 11.61    | 15.41     |
|      |                   | north american badger | -10.90    | -8.28    | -0.74    | 6.43     | 9.21      |
|      |                   | north american beaver | -5.27     | -4.35    | 0.29     | 5.67     | 7.17      |
|      |                   | north american mink   | -0.81     | -0.24    | 2.89     | 6.36     | 7.03      |
|      |                   | raccoon               | -2.85     | -2.77    | -2.38    | -1.98    | -1.90     |
|      |                   | red fox               | -0.99     | -0.67    | 1.13     | 3.05     | 3.40      |
|      |                   | red squirrel          | -14.80    | -13.41   | -6.47    | -0.85    | -0.08     |
|      |                   | striped skunk         | -8.72     | -7.24    | -0.74    | 5.59     | 7.13      |
|      |                   | virginia opossum      | -0.84     | -0.73    | -0.18    | 0.38     | 0.49      |
|      |                   | white tailed deer     | -7.62     | -7.40    | -6.16    | -4.98    | -4.75     |
|      |                   | woodchuck             | 2.39      | 2.90     | 5.63     | 8.50     | 9.06      |



**Table S36:** Species and city-specific detection parameters. Note that all of these species do not likely reside in this city (that is controlled by another level of the model). (continued)

| City               | Parameter             | Species               | CI(0.025)     | CI(0.05) | Estimate | CI(0.95) | CI(0.975) |      |
|--------------------|-----------------------|-----------------------|---------------|----------|----------|----------|-----------|------|
| Iowa City, IA      | intercept             | armadillo             | -3.70         | -3.41    | -2.06    | -0.74    | -0.49     |      |
|                    |                       | bobcat                | -5.77         | -5.56    | -4.57    | -3.75    | -3.62     |      |
|                    |                       | cottontail sp         | -1.23         | -1.22    | -1.17    | -1.12    | -1.11     |      |
|                    |                       | coyote                | -3.18         | -3.16    | -3.03    | -2.91    | -2.88     |      |
|                    |                       | eastern chipmunk      | -1.61         | -1.59    | -1.47    | -1.35    | -1.33     |      |
|                    |                       | elk                   | -5.29         | -4.90    | -3.27    | -1.64    | -1.33     |      |
|                    |                       | flying squirrel sp    | -6.25         | -5.89    | -4.35    | -3.10    | -2.88     |      |
|                    |                       | fox squirrel          | -1.87         | -1.85    | -1.78    | -1.71    | -1.70     |      |
|                    |                       | gray fox              | -6.32         | -5.90    | -4.01    | -2.59    | -2.35     |      |
|                    |                       | gray squirrel sp      | -0.66         | -0.65    | -0.62    | -0.58    | -0.57     |      |
|                    |                       | mule deer             | -3.45         | -3.14    | -1.69    | -0.29    | 0.00      |      |
|                    |                       | north american badger | -5.51         | -5.25    | -4.10    | -3.15    | -3.01     |      |
|                    |                       | north american beaver | -6.14         | -5.78    | -4.31    | -3.03    | -2.80     |      |
|                    |                       | north american mink   | -4.37         | -4.29    | -3.91    | -3.58    | -3.51     |      |
|                    |                       | raccoon               | -0.60         | -0.59    | -0.55    | -0.52    | -0.51     |      |
|                    |                       | red fox               | -2.10         | -2.08    | -2.01    | -1.93    | -1.92     |      |
|                    |                       | red squirrel          | -4.36         | -3.96    | -2.32    | -0.82    | -0.50     |      |
|                    |                       | striped skunk         | -4.49         | -4.38    | -3.78    | -3.24    | -3.14     |      |
|                    |                       | virginia opossum      | -1.66         | -1.65    | -1.60    | -1.54    | -1.53     |      |
|                    |                       | white tailed deer     | -0.91         | -0.91    | -0.87    | -0.83    | -0.83     |      |
|                    |                       | woodchuck             | -3.17         | -3.13    | -2.89    | -2.68    | -2.64     |      |
|                    |                       | gent                  | armadillo     | -1.97    | -1.60    | -0.05    | 1.41      | 1.77 |
|                    |                       |                       | bobcat        | -2.44    | -2.07    | -0.60    | 0.75      | 1.06 |
|                    |                       |                       | cottontail sp | -0.10    | -0.07    | 0.11     | 0.29      | 0.33 |
|                    | coyote                |                       | -0.64         | -0.53    | 0.02     | 0.64     | 0.75      |      |
|                    | eastern chipmunk      |                       | -2.54         | -2.25    | -0.99    | 0.23     | 0.47      |      |
|                    | elk                   |                       | -3.19         | -2.71    | -0.67    | 1.25     | 1.73      |      |
|                    | flying squirrel sp    |                       | -3.36         | -2.94    | -1.12    | 0.61     | 1.01      |      |
|                    | fox squirrel          |                       | -2.26         | -2.03    | -0.72    | 0.61     | 0.91      |      |
|                    | gray fox              |                       | -4.27         | -3.62    | -0.55    | 2.42     | 3.12      |      |
|                    | gray squirrel sp      |                       | -0.74         | -0.71    | -0.53    | -0.36    | -0.33     |      |
|                    | mule deer             |                       | -3.18         | -2.81    | -1.27    | 0.28     | 0.65      |      |
|                    | north american badger |                       | -3.00         | -2.63    | -0.81    | 0.95     | 1.32      |      |
|                    | north american beaver |                       | -2.82         | -2.32    | -0.20    | 1.68     | 2.14      |      |
|                    | north american mink   |                       | -1.34         | -1.09    | 0.17     | 1.46     | 1.72      |      |
|                    | raccoon               |                       | -0.12         | -0.09    | 0.03     | 0.15     | 0.17      |      |
|                    | red fox               |                       | -0.30         | -0.24    | 0.01     | 0.25     | 0.29      |      |
|                    | red squirrel          |                       | -3.18         | -2.80    | -1.09    | 0.66     | 1.09      |      |
|                    | striped skunk         |                       | -1.96         | -1.75    | -0.75    | 0.18     | 0.36      |      |
|                    | virginia opossum      |                       | -0.56         | -0.52    | -0.28    | -0.07    | -0.03     |      |
|                    | white tailed deer     |                       | -0.04         | -0.02    | 0.11     | 0.23     | 0.25      |      |
|                    | woodchuck             |                       | -2.04         | -1.83    | -0.80    | 0.22     | 0.40      |      |
|                    | imp                   |                       | armadillo     | -3.49    | -2.86    | 0.05     | 3.10      | 3.80 |
|                    |                       | bobcat                | -2.90         | -2.23    | 1.40     | 5.76     | 6.69      |      |
|                    |                       | cottontail sp         | 0.94          | 1.01     | 1.32     | 1.64     | 1.70      |      |
|                    |                       | coyote                | -1.74         | -1.56    | -0.65    | 0.23     | 0.39      |      |
| eastern chipmunk   |                       | 1.47                  | 1.60          | 2.26     | 2.92     | 3.05     |           |      |
| elk                |                       | -6.52                 | -5.11         | -0.37    | 4.55     | 6.02     |           |      |
| flying squirrel sp |                       | -5.50                 | -4.43         | -0.11    | 4.52     | 5.73     |           |      |

**Table S36:** Species and city-specific detection parameters. Note that all of these species do not likely reside in this city (that is controlled by another level of the model). (continued)

| City                  | Parameter             | Species               | CI(0.025) | CI(0.05) | Estimate | CI(0.95) | CI(0.975) |
|-----------------------|-----------------------|-----------------------|-----------|----------|----------|----------|-----------|
| Jackson, MS           | gent X imp            | fox squirrel          | -0.25     | -0.15    | 0.37     | 0.87     | 0.97      |
|                       |                       | gray fox              | -4.38     | -3.53    | 0.51     | 4.57     | 5.50      |
|                       |                       | gray squirrel sp      | 1.73      | 1.79     | 2.03     | 2.28     | 2.33      |
|                       |                       | mule deer             | -3.41     | -2.72    | 0.31     | 3.41     | 3.97      |
|                       |                       | north american badger | -5.05     | -4.06    | -0.03    | 3.88     | 4.79      |
|                       |                       | north american beaver | -7.28     | -5.91    | -0.52    | 4.40     | 5.75      |
|                       |                       | north american mink   | -0.87     | -0.54    | 1.20     | 2.99     | 3.30      |
|                       |                       | raccoon               | 0.15      | 0.19     | 0.43     | 0.67     | 0.71      |
|                       |                       | red fox               | -0.61     | -0.52    | -0.06    | 0.43     | 0.52      |
|                       |                       | red squirrel          | -5.30     | -4.16    | 0.25     | 4.38     | 5.46      |
|                       |                       | striped skunk         | -5.37     | -4.69    | -0.59    | 3.70     | 4.47      |
|                       |                       | virginia opossum      | 0.84      | 0.91     | 1.27     | 1.62     | 1.70      |
|                       |                       | white tailed deer     | 0.65      | 0.70     | 0.94     | 1.19     | 1.24      |
|                       |                       | woodchuck             | 0.83      | 1.04     | 2.16     | 3.35     | 3.56      |
|                       |                       | armadillo             | -13.77    | -10.63   | -0.96    | 8.91     | 11.76     |
|                       |                       | bobcat                | -8.37     | -6.81    | -1.02    | 5.65     | 7.53      |
|                       |                       | cottontail sp         | -0.32     | -0.18    | 0.52     | 1.22     | 1.36      |
|                       |                       | coyote                | -6.84     | -5.93    | -1.45    | 3.35     | 4.29      |
|                       |                       | eastern chipmunk      | -20.04    | -17.19   | -5.65    | 5.70     | 7.79      |
|                       |                       | elk                   | -15.97    | -10.63   | -0.92    | 9.01     | 13.47     |
|                       |                       | flying squirrel sp    | -10.24    | -7.88    | -0.90    | 6.16     | 8.58      |
|                       | fox squirrel          | -11.27                | -9.34     | 1.48     | 13.45    | 16.03    |           |
|                       | gray fox              | -9.80                 | -8.11     | 0.66     | 9.71     | 11.70    |           |
|                       | gray squirrel sp      | 1.06                  | 1.20      | 1.92     | 2.65     | 2.78     |           |
|                       | mule deer             | -18.19                | -14.18    | -1.16    | 12.29    | 15.91    |           |
|                       | north american badger | -10.16                | -7.69     | -0.65    | 6.87     | 9.68     |           |
|                       | north american beaver | -11.53                | -9.06     | -1.25    | 6.86     | 9.22     |           |
|                       | north american mink   | -15.54                | -13.43    | -4.50    | 2.27     | 3.70     |           |
|                       | raccoon               | -2.50                 | -2.37     | -1.76    | -1.16    | -1.04    |           |
|                       | red fox               | -5.62                 | -5.29     | -3.62    | -2.11    | -1.79    |           |
|                       | red squirrel          | -13.45                | -10.38    | -1.37    | 8.36     | 11.81    |           |
|                       | striped skunk         | -8.28                 | -6.75     | -0.69    | 5.60     | 7.16     |           |
|                       | virginia opossum      | -7.26                 | -6.92     | -5.34    | -3.93    | -3.69    |           |
|                       | white tailed deer     | -2.54                 | -2.41     | -1.77    | -1.12    | -1.01    |           |
|                       | woodchuck             | -0.94                 | -0.40     | 2.62     | 5.78     | 6.35     |           |
|                       | armadillo             | -3.00                 | -2.96     | -2.76    | -2.57    | -2.53    |           |
|                       | bobcat                | -4.76                 | -4.62     | -3.91    | -3.31    | -3.21    |           |
|                       | cottontail sp         | -3.19                 | -3.12     | -2.75    | -2.43    | -2.37    |           |
|                       | coyote                | -3.52                 | -3.45     | -3.09    | -2.76    | -2.72    |           |
|                       | eastern chipmunk      | -3.79                 | -3.47     | -2.06    | -0.70    | -0.46    |           |
|                       | elk                   | -5.27                 | -4.90     | -3.25    | -1.66    | -1.32    |           |
|                       | flying squirrel sp    | -6.20                 | -5.82     | -3.89    | -2.09    | -1.74    |           |
| fox squirrel          | -3.40                 | -3.28                 | -2.73     | -2.25    | -2.16    |          |           |
| gray fox              | -2.84                 | -2.78                 | -2.49     | -2.23    | -2.18    |          |           |
| gray squirrel sp      | -0.51                 | -0.50                 | -0.45     | -0.40    | -0.39    |          |           |
| mule deer             | -3.42                 | -3.13                 | -1.68     | -0.28    | 0.02     |          |           |
| north american badger | -5.87                 | -5.46                 | -3.67     | -2.02    | -1.67    |          |           |
| north american beaver | -6.29                 | -5.92                 | -4.15     | -2.58    | -2.26    |          |           |
| north american mink   | -6.56                 | -6.17                 | -4.44     | -2.90    | -2.54    |          |           |
| Jackson, MS           | intercept             | armadillo             | -3.00     | -2.96    | -2.76    | -2.57    | -2.53     |
|                       |                       | bobcat                | -4.76     | -4.62    | -3.91    | -3.31    | -3.21     |
|                       |                       | cottontail sp         | -3.19     | -3.12    | -2.75    | -2.43    | -2.37     |
|                       |                       | coyote                | -3.52     | -3.45    | -3.09    | -2.76    | -2.72     |
|                       |                       | eastern chipmunk      | -3.79     | -3.47    | -2.06    | -0.70    | -0.46     |
|                       |                       | elk                   | -5.27     | -4.90    | -3.25    | -1.66    | -1.32     |
|                       |                       | flying squirrel sp    | -6.20     | -5.82    | -3.89    | -2.09    | -1.74     |
|                       |                       | fox squirrel          | -3.40     | -3.28    | -2.73    | -2.25    | -2.16     |
|                       |                       | gray fox              | -2.84     | -2.78    | -2.49    | -2.23    | -2.18     |
|                       |                       | gray squirrel sp      | -0.51     | -0.50    | -0.45    | -0.40    | -0.39     |
|                       |                       | mule deer             | -3.42     | -3.13    | -1.68    | -0.28    | 0.02      |
|                       |                       | north american badger | -5.87     | -5.46    | -3.67    | -2.02    | -1.67     |
|                       |                       | north american beaver | -6.29     | -5.92    | -4.15    | -2.58    | -2.26     |
|                       |                       | north american mink   | -6.56     | -6.17    | -4.44    | -2.90    | -2.54     |

**Table S36:** Species and city-specific detection parameters. Note that all of these species do not likely reside in this city (that is controlled by another level of the model). (continued)

| City | Parameter         | Species               | CI(0.025)        | CI(0.05) | Estimate | CI(0.95) | CI(0.975) |       |
|------|-------------------|-----------------------|------------------|----------|----------|----------|-----------|-------|
| gent |                   | raccoon               | -1.29            | -1.27    | -1.21    | -1.15    | -1.13     |       |
|      |                   | red fox               | -1.65            | -1.63    | -1.54    | -1.44    | -1.42     |       |
|      |                   | red squirrel          | -4.18            | -3.83    | -2.29    | -0.77    | -0.42     |       |
|      |                   | striped skunk         | -3.78            | -3.61    | -2.86    | -2.22    | -2.11     |       |
|      |                   | virginia opossum      | -1.95            | -1.93    | -1.84    | -1.75    | -1.73     |       |
|      |                   | white tailed deer     | -1.32            | -1.31    | -1.25    | -1.18    | -1.17     |       |
|      |                   | woodchuck             | -4.57            | -4.27    | -2.92    | -1.58    | -1.29     |       |
|      |                   | armadillo             | -1.42            | -1.17    | 0.09     | 1.16     | 1.35      |       |
|      |                   | bobcat                | -2.13            | -1.86    | -0.56    | 0.67     | 0.88      |       |
|      |                   | cottontail sp         | -1.81            | -1.66    | -0.94    | -0.28    | -0.16     |       |
|      |                   | coyote                | -1.40            | -1.21    | -0.33    | 0.59     | 0.76      |       |
|      |                   | eastern chipmunk      | -2.97            | -2.52    | -0.74    | 1.04     | 1.40      |       |
|      |                   | elk                   | -3.18            | -2.70    | -0.71    | 1.22     | 1.66      |       |
|      |                   | flying squirrel sp    | -3.34            | -2.96    | -1.13    | 0.64     | 1.04      |       |
|      |                   | fox squirrel          | -2.39            | -2.07    | -0.46    | 0.95     | 1.23      |       |
|      |                   | gray fox              | -3.56            | -3.30    | -2.13    | -1.11    | -0.94     |       |
|      |                   | gray squirrel sp      | -0.11            | -0.09    | 0.02     | 0.13     | 0.15      |       |
|      |                   | mule deer             | -3.10            | -2.77    | -1.30    | 0.33     | 0.74      |       |
|      |                   | north american badger | -2.92            | -2.50    | -0.71    | 1.07     | 1.49      |       |
|      |                   | north american beaver | -2.98            | -2.45    | -0.24    | 1.64     | 2.09      |       |
|      |                   | north american mink   | -2.37            | -1.96    | -0.23    | 1.45     | 1.80      |       |
|      | imp               |                       | raccoon          | 0.08     | 0.10     | 0.23     | 0.36      | 0.39  |
|      |                   |                       | red fox          | -2.26    | -2.14    | -1.52    | -0.96     | -0.87 |
|      |                   |                       | red squirrel     | -3.14    | -2.76    | -1.08    | 0.62      | 0.99  |
|      |                   |                       | striped skunk    | -2.51    | -2.23    | -0.85    | 0.49      | 0.75  |
|      |                   |                       | virginia opossum | -0.36    | -0.33    | -0.11    | 0.09      | 0.13  |
|      |                   | white tailed deer     | -0.57            | -0.53    | -0.34    | -0.16    | -0.12     |       |
|      |                   | woodchuck             | -2.54            | -2.19    | -0.69    | 0.77     | 1.12      |       |
|      |                   | armadillo             | 0.53             | 0.71     | 1.75     | 2.89     | 3.09      |       |
|      |                   | bobcat                | -1.37            | -0.82    | 2.74     | 7.20     | 8.23      |       |
|      |                   | cottontail sp         | -5.71            | -5.34    | -3.57    | -1.97    | -1.68     |       |
|      |                   | coyote                | -0.94            | -0.63    | 0.96     | 2.55     | 2.83      |       |
|      |                   | eastern chipmunk      | -5.99            | -4.94    | 0.10     | 5.14     | 6.28      |       |
|      |                   | elk                   | -6.47            | -5.11    | -0.41    | 4.45     | 5.87      |       |
|      |                   | flying squirrel sp    | -5.75            | -4.59    | -0.11    | 4.57     | 5.92      |       |
|      |                   | fox squirrel          | -8.61            | -7.68    | -3.43    | 0.32     | 1.00      |       |
|      |                   | gray fox              | 0.44             | 0.81     | 2.63     | 4.58     | 4.93      |       |
|      |                   | gray squirrel sp      | 1.85             | 1.91     | 2.23     | 2.55     | 2.61      |       |
|      |                   | mule deer             | -3.44            | -2.73    | 0.33     | 3.32     | 3.95      |       |
|      |                   | north american badger | -5.76            | -4.43    | 0.17     | 4.84     | 6.36      |       |
|      |                   | north american beaver | -7.29            | -5.75    | -0.20    | 5.16     | 6.60      |       |
|      |                   | north american mink   | -3.82            | -3.07    | 0.19     | 3.39     | 4.11      |       |
|      |                   | raccoon               | 0.21             | 0.28     | 0.67     | 1.05     | 1.13      |       |
|      |                   | red fox               | 1.77             | 1.90     | 2.61     | 3.33     | 3.47      |       |
|      |                   | red squirrel          | -5.03            | -3.98    | 0.19     | 4.35     | 5.48      |       |
|      |                   | striped skunk         | -4.25            | -3.27    | 1.90     | 7.66     | 8.77      |       |
|      |                   | virginia opossum      | 2.31             | 2.39     | 2.83     | 3.29     | 3.38      |       |
|      | white tailed deer | -1.69                 | -1.59            | -1.10    | -0.62    | -0.52    |           |       |
|      | woodchuck         | -4.98                 | -3.88            | 1.07     | 5.79     | 6.84     |           |       |

**Table S36:** Species and city-specific detection parameters. Note that all of these species do not likely reside in this city (that is controlled by another level of the model). (continued)

| City               | Parameter             | Species               | CI(0.025) | CI(0.05) | Estimate | CI(0.95) | CI(0.975) |       |
|--------------------|-----------------------|-----------------------|-----------|----------|----------|----------|-----------|-------|
| Little Rock, AR    | gent X imp            | armadillo             | -16.21    | -14.56   | -6.24    | 0.44     | 1.49      |       |
|                    |                       | bobcat                | -9.10     | -7.55    | -1.84    | 3.65     | 5.13      |       |
|                    |                       | cottontail sp         | -9.51     | -8.48    | -3.46    | 1.25     | 2.17      |       |
|                    |                       | coyote                | -7.89     | -6.83    | -1.95    | 2.53     | 3.44      |       |
|                    |                       | eastern chipmunk      | -21.02    | -16.82   | -0.35    | 15.72    | 19.80     |       |
|                    |                       | elk                   | -15.46    | -10.46   | -0.82    | 9.15     | 14.17     |       |
|                    |                       | flying squirrel sp    | -10.63    | -8.09    | -0.98    | 5.85     | 8.17      |       |
|                    |                       | fox squirrel          | -20.70    | -17.70   | -4.72    | 5.85     | 8.19      |       |
|                    |                       | gray fox              | -9.36     | -8.09    | -2.61    | 2.15     | 3.00      |       |
|                    |                       | gray squirrel sp      | -0.26     | -0.17    | 0.38     | 0.92     | 1.02      |       |
|                    |                       | mule deer             | -17.60    | -13.81   | -1.06    | 11.73    | 15.29     |       |
|                    |                       | north american badger | -10.82    | -8.21    | -0.81    | 6.83     | 9.45      |       |
|                    |                       | north american beaver | -11.41    | -9.02    | -1.31    | 6.51     | 8.83      |       |
|                    |                       | north american mink   | -11.61    | -9.32    | -1.11    | 7.07     | 9.69      |       |
|                    |                       | raccoon               | -3.54     | -3.37    | -2.44    | -1.51    | -1.35     |       |
|                    |                       | red fox               | -10.46    | -9.53    | -5.08    | -0.92    | -0.20     |       |
|                    |                       | red squirrel          | -14.23    | -10.99   | -1.28    | 8.38     | 11.91     |       |
|                    |                       | striped skunk         | -9.79     | -7.78    | -0.89    | 5.72     | 7.30      |       |
|                    |                       | virginia opossum      | -6.67     | -6.42    | -5.21    | -4.07    | -3.85     |       |
|                    |                       | white tailed deer     | -3.47     | -3.16    | -1.73    | -0.34    | -0.09     |       |
|                    |                       | woodchuck             | -9.96     | -8.09    | -0.51    | 6.80     | 8.54      |       |
|                    |                       | intercept             | armadillo | -1.93    | -1.91    | -1.81    | -1.71     | -1.69 |
|                    |                       | bobcat                | -4.63     | -4.47    | -3.72    | -3.05    | -2.94     |       |
|                    | cottontail sp         | -1.61                 | -1.59     | -1.51    | -1.43    | -1.41    |           |       |
|                    | coyote                | -3.98                 | -3.92     | -3.63    | -3.37    | -3.32    |           |       |
|                    | eastern chipmunk      | -2.25                 | -2.20     | -1.92    | -1.67    | -1.63    |           |       |
|                    | elk                   | -5.26                 | -4.91     | -3.28    | -1.67    | -1.31    |           |       |
|                    | flying squirrel sp    | -4.15                 | -4.02     | -3.39    | -2.86    | -2.77    |           |       |
|                    | fox squirrel          | -1.59                 | -1.57     | -1.45    | -1.33    | -1.31    |           |       |
|                    | gray fox              | -2.62                 | -2.59     | -2.42    | -2.26    | -2.23    |           |       |
|                    | gray squirrel sp      | -0.34                 | -0.32     | -0.27    | -0.22    | -0.21    |           |       |
|                    | mule deer             | -3.40                 | -3.11     | -1.70    | -0.27    | 0.01     |           |       |
|                    | north american badger | -5.97                 | -5.55     | -3.74    | -2.05    | -1.70    |           |       |
|                    | north american beaver | -5.93                 | -5.66     | -4.20    | -2.99    | -2.77    |           |       |
|                    | north american mink   | -6.12                 | -5.86     | -4.64    | -3.54    | -3.34    |           |       |
| raccoon            | -0.93                 | -0.91                 | -0.84     | -0.78    | -0.76    |          |           |       |
| red fox            | -2.94                 | -2.88                 | -2.60     | -2.35    | -2.30    |          |           |       |
| red squirrel       | -4.19                 | -3.83                 | -2.30     | -0.78    | -0.49    |          |           |       |
| striped skunk      | -2.68                 | -2.64                 | -2.43     | -2.24    | -2.20    |          |           |       |
| virginia opossum   | -1.07                 | -1.06                 | -1.00     | -0.94    | -0.93    |          |           |       |
| white tailed deer  | -1.38                 | -1.37                 | -1.28     | -1.18    | -1.17    |          |           |       |
| woodchuck          | -3.12                 | -3.05                 | -2.66     | -2.33    | -2.27    |          |           |       |
| gent               | armadillo             | -0.97                 | -0.76     | 0.25     | 1.25     | 1.50     |           |       |
| bobcat             | -1.18                 | -0.97                 | 0.21      | 1.54     | 1.86     |          |           |       |
| cottontail sp      | 0.27                  | 0.35                  | 0.78      | 1.21     | 1.30     |          |           |       |
| coyote             | -1.37                 | -1.15                 | -0.09     | 0.93     | 1.15     |          |           |       |
| eastern chipmunk   | -2.95                 | -2.57                 | -0.81     | 0.95     | 1.36     |          |           |       |
| elk                | -3.13                 | -2.70                 | -0.68     | 1.28     | 1.78     |          |           |       |
| flying squirrel sp | -3.50                 | -3.09                 | -1.30     | 0.43     | 0.84     |          |           |       |

**Table S36:** Species and city-specific detection parameters. Note that all of these species do not likely reside in this city (that is controlled by another level of the model). (continued)

| City | Parameter  | Species               | CI(0.025) | CI(0.05) | Estimate | CI(0.95) | CI(0.975) |
|------|------------|-----------------------|-----------|----------|----------|----------|-----------|
|      |            | fox squirrel          | -2.77     | -2.43    | -0.97    | 0.24     | 0.45      |
|      |            | gray fox              | 4.18      | 4.27     | 4.76     | 5.26     | 5.36      |
|      |            | gray squirrel sp      | -1.46     | -1.40    | -1.08    | -0.78    | -0.73     |
|      |            | mule deer             | -3.13     | -2.77    | -1.30    | 0.36     | 0.75      |
|      |            | north american badger | -2.90     | -2.50    | -0.73    | 1.05     | 1.48      |
|      |            | north american beaver | -2.89     | -2.41    | -0.25    | 1.64     | 2.06      |
|      |            | north american mink   | -1.59     | -1.29    | 0.22     | 1.81     | 2.18      |
|      |            | raccoon               | 0.43      | 0.49     | 0.79     | 1.10     | 1.16      |
|      |            | red fox               | -2.22     | -1.95    | -0.59    | 0.66     | 0.93      |
|      |            | red squirrel          | -3.18     | -2.83    | -1.09    | 0.65     | 1.06      |
|      |            | striped skunk         | -1.78     | -1.60    | -0.73    | 0.13     | 0.32      |
|      |            | virginia opossum      | 0.35      | 0.40     | 0.70     | 0.99     | 1.05      |
|      |            | white tailed deer     | -2.65     | -2.31    | -0.82    | 0.44     | 0.65      |
|      |            | woodchuck             | -2.00     | -1.76    | -0.65    | 0.41     | 0.63      |
|      | imp        | armadillo             | -1.67     | -1.54    | -0.95    | -0.37    | -0.26     |
|      |            | bobcat                | -7.18     | -6.37    | -2.43    | 0.82     | 1.47      |
|      |            | cottontail sp         | -0.56     | -0.46    | 0.04     | 0.55     | 0.65      |
|      |            | coyote                | -3.05     | -2.80    | -1.33    | 0.06     | 0.32      |
|      |            | eastern chipmunk      | 2.89      | 3.17     | 4.62     | 6.11     | 6.40      |
|      |            | elk                   | -6.45     | -5.12    | -0.34    | 4.73     | 6.19      |
|      |            | flying squirrel sp    | -2.01     | -1.56    | 0.80     | 3.31     | 3.79      |
|      |            | fox squirrel          | -2.80     | -2.64    | -1.82    | -1.03    | -0.88     |
|      |            | gray fox              | 1.10      | 1.27     | 2.21     | 3.12     | 3.28      |
|      |            | gray squirrel sp      | 0.55      | 0.61     | 0.94     | 1.26     | 1.32      |
|      |            | mule deer             | -3.37     | -2.71    | 0.33     | 3.32     | 4.10      |
|      |            | north american badger | -5.50     | -4.27    | 0.16     | 4.73     | 6.09      |
|      |            | north american beaver | -7.28     | -5.80    | -0.42    | 4.83     | 6.17      |
|      |            | north american mink   | -3.10     | -2.50    | 0.44     | 3.43     | 4.17      |
|      |            | raccoon               | -2.61     | -2.52    | -2.09    | -1.67    | -1.59     |
|      |            | red fox               | 1.00      | 1.40     | 3.52     | 5.96     | 6.46      |
|      |            | red squirrel          | -5.20     | -4.12    | 0.22     | 4.40     | 5.58      |
|      |            | striped skunk         | -1.00     | -0.79    | 0.33     | 1.38     | 1.56      |
|      |            | virginia opossum      | -1.88     | -1.80    | -1.40    | -1.02    | -0.94     |
|      |            | white tailed deer     | -1.02     | -0.89    | -0.27    | 0.36     | 0.48      |
|      |            | woodchuck             | -3.73     | -3.30    | -1.24    | 0.57     | 0.94      |
|      | gent X imp | armadillo             | -9.75     | -7.90    | -0.38    | 7.26     | 8.90      |
|      |            | bobcat                | -5.32     | -4.38    | 0.15     | 6.13     | 7.58      |
|      |            | cottontail sp         | -2.12     | -1.88    | -0.58    | 0.69     | 0.93      |
|      |            | coyote                | -6.41     | -5.48    | -1.42    | 2.49     | 3.31      |
|      |            | eastern chipmunk      | -24.06    | -19.48   | -1.96    | 14.50    | 18.67     |
|      |            | elk                   | -15.08    | -10.19   | -0.80    | 9.38     | 14.77     |
|      |            | flying squirrel sp    | -12.75    | -10.07   | -2.02    | 4.07     | 6.18      |
|      |            | fox squirrel          | -10.27    | -9.14    | -3.47    | 1.49     | 2.44      |
|      |            | gray fox              | -18.37    | -17.85   | -15.28   | -12.89   | -12.44    |
|      |            | gray squirrel sp      | 0.84      | 0.99     | 1.83     | 2.68     | 2.85      |
|      |            | mule deer             | -17.74    | -13.54   | -1.03    | 11.90    | 15.29     |
|      |            | north american badger | -11.27    | -8.39    | -0.83    | 6.67     | 9.28      |
|      |            | north american beaver | -12.39    | -9.74    | -1.61    | 5.92     | 8.24      |
|      |            | north american mink   | -5.50     | -4.47    | 0.82     | 7.21     | 8.82      |

**Table S36:** Species and city-specific detection parameters. Note that all of these species do not likely reside in this city (that is controlled by another level of the model). (continued)

| City              | Parameter             | Species               | CI(0.025) | CI(0.05) | Estimate | CI(0.95) | CI(0.975) |
|-------------------|-----------------------|-----------------------|-----------|----------|----------|----------|-----------|
| Madison, WI       | intercept             | raccoon               | -1.86     | -1.65    | -0.66    | 0.29     | 0.49      |
|                   |                       | red fox               | -15.50    | -13.79   | -5.70    | 2.68     | 4.29      |
|                   |                       | red squirrel          | -14.56    | -10.83   | -1.36    | 8.59     | 12.23     |
|                   |                       | striped skunk         | -9.67     | -8.41    | -2.43    | 3.31     | 4.61      |
|                   |                       | virginia opossum      | -0.26     | -0.11    | 0.79     | 1.67     | 1.83      |
|                   |                       | white tailed deer     | -23.35    | -20.87   | -9.66    | -0.37    | 1.69      |
|                   |                       | woodchuck             | -7.57     | -6.68    | -2.04    | 2.63     | 3.61      |
|                   |                       | armadillo             | -3.69     | -3.40    | -2.07    | -0.76    | -0.52     |
|                   |                       | bobcat                | -6.05     | -5.67    | -4.00    | -2.50    | -2.20     |
|                   |                       | cottontail sp         | -1.20     | -1.17    | -1.00    | -0.83    | -0.80     |
|                   |                       | coyote                | -3.31     | -3.20    | -2.70    | -2.25    | -2.17     |
|                   |                       | eastern chipmunk      | -2.65     | -2.53    | -1.94    | -1.43    | -1.33     |
|                   |                       | elk                   | -5.23     | -4.89    | -3.25    | -1.66    | -1.33     |
|                   |                       | flying squirrel sp    | -6.05     | -5.62    | -3.76    | -1.95    | -1.58     |
|                   |                       | fox squirrel          | -3.74     | -3.41    | -1.83    | -0.40    | -0.12     |
|                   |                       | gray fox              | -3.40     | -3.14    | -1.81    | -0.56    | -0.33     |
|                   |                       | gray squirrel sp      | -0.94     | -0.91    | -0.78    | -0.65    | -0.63     |
|                   |                       | mule deer             | -3.45     | -3.17    | -1.70    | -0.29    | 0.01      |
|                   |                       | north american badger | -5.91     | -5.50    | -3.77    | -2.08    | -1.70     |
|                   |                       | north american beaver | -5.68     | -5.38    | -3.98    | -2.78    | -2.58     |
|                   |                       | north american mink   | -4.98     | -4.73    | -3.54    | -2.48    | -2.29     |
|                   | raccoon               | -2.09                 | -2.04     | -1.81    | -1.59    | -1.55    |           |
|                   | red fox               | -4.61                 | -4.25     | -2.58    | -1.06    | -0.75    |           |
|                   | red squirrel          | -4.47                 | -4.08     | -2.38    | -0.82    | -0.54    |           |
|                   | striped skunk         | -2.72                 | -2.61     | -2.03    | -1.53    | -1.46    |           |
|                   | virginia opossum      | -2.51                 | -2.45     | -2.16    | -1.89    | -1.85    |           |
|                   | white tailed deer     | -2.78                 | -2.69     | -2.23    | -1.84    | -1.77    |           |
|                   | woodchuck             | -5.03                 | -4.74     | -3.46    | -2.44    | -2.26    |           |
|                   | armadillo             | -1.96                 | -1.56     | -0.05    | 1.37     | 1.72     |           |
|                   | bobcat                | -2.23                 | -1.89     | -0.41    | 1.02     | 1.35     |           |
|                   | cottontail sp         | -0.05                 | 0.01      | 0.33     | 0.65     | 0.70     |           |
|                   | coyote                | -2.38                 | -2.09     | -0.60    | 0.86     | 1.17     |           |
|                   | eastern chipmunk      | -3.04                 | -2.62     | -0.85    | 0.92     | 1.37     |           |
|                   | elk                   | -3.18                 | -2.71     | -0.69    | 1.26     | 1.83     |           |
|                   | flying squirrel sp    | -3.31                 | -2.88     | -1.11    | 0.64     | 1.04     |           |
|                   | fox squirrel          | -2.13                 | -1.77     | -0.12    | 1.49     | 1.84     |           |
|                   | gray fox              | -5.76                 | -4.85     | -0.85    | 3.00     | 3.83     |           |
|                   | gray squirrel sp      | 0.06                  | 0.11      | 0.43     | 0.74     | 0.80     |           |
|                   | mule deer             | -3.11                 | -2.79     | -1.29    | 0.34     | 0.71     |           |
|                   | north american badger | -2.97                 | -2.54     | -0.75    | 1.06     | 1.45     |           |
|                   | north american beaver | -2.90                 | -2.32     | -0.24    | 1.64     | 2.07     |           |
|                   | north american mink   | -2.37                 | -1.99     | -0.27    | 1.43     | 1.80     |           |
| raccoon           | -0.26                 | -0.18                 | 0.22      | 0.59     | 0.67     |          |           |
| red fox           | -2.58                 | -2.14                 | 0.00      | 2.02     | 2.48     |          |           |
| red squirrel      | -3.13                 | -2.77                 | -1.12     | 0.63     | 1.06     |          |           |
| striped skunk     | -2.44                 | -2.18                 | -0.82     | 0.51     | 0.81     |          |           |
| virginia opossum  | -1.13                 | -0.99                 | -0.26     | 0.35     | 0.46     |          |           |
| white tailed deer | -2.55                 | -2.11                 | -0.29     | 1.27     | 1.61     |          |           |
| woodchuck         | -2.64                 | -2.31                 | -0.83     | 0.60     | 0.94     |          |           |
|                   | gent                  |                       |           |          |          |          |           |

**Table S36:** Species and city-specific detection parameters. Note that all of these species do not likely reside in this city (that is controlled by another level of the model). (continued)

| City               | Parameter             | Species               | CI(0.025) | CI(0.05) | Estimate | CI(0.95) | CI(0.975) |       |
|--------------------|-----------------------|-----------------------|-----------|----------|----------|----------|-----------|-------|
| Metro LA, CA       | imp                   | armadillo             | -3.53     | -2.80    | 0.08     | 3.12     | 3.84      |       |
|                    |                       | bobcat                | -6.04     | -5.01    | -0.08    | 5.06     | 6.28      |       |
|                    |                       | cottontail sp         | 2.29      | 2.50     | 3.67     | 4.85     | 5.09      |       |
|                    |                       | coyote                | -3.75     | -3.25    | -0.89    | 1.34     | 1.79      |       |
|                    |                       | eastern chipmunk      | -4.81     | -4.23    | -1.04    | 2.05     | 2.64      |       |
|                    |                       | elk                   | -6.58     | -5.17    | -0.40    | 4.54     | 5.97      |       |
|                    |                       | flying squirrel sp    | -5.83     | -4.56    | -0.15    | 4.62     | 5.99      |       |
|                    |                       | fox squirrel          | -6.31     | -5.17    | -0.07    | 4.84     | 5.96      |       |
|                    |                       | gray fox              | -7.02     | -6.00    | -1.33    | 2.41     | 3.15      |       |
|                    |                       | gray squirrel sp      | 0.59      | 0.82     | 1.87     | 2.97     | 3.18      |       |
|                    |                       | mule deer             | -3.50     | -2.77    | 0.30     | 3.37     | 4.06      |       |
|                    |                       | north american badger | -5.66     | -4.34    | 0.13     | 4.69     | 5.99      |       |
|                    |                       | north american beaver | -6.49     | -5.13    | 0.01     | 5.37     | 6.81      |       |
|                    |                       | north american mink   | -3.62     | -2.88    | 0.31     | 3.58     | 4.32      |       |
|                    |                       | raccoon               | -1.50     | -1.19    | 0.27     | 1.73     | 1.99      |       |
|                    |                       | red fox               | -3.17     | -2.42    | 0.76     | 3.82     | 4.57      |       |
|                    |                       | red squirrel          | -5.05     | -4.08    | 0.28     | 4.33     | 5.34      |       |
|                    |                       | striped skunk         | -5.84     | -5.10    | -1.19    | 2.85     | 3.68      |       |
|                    |                       | virginia opossum      | -1.10     | -0.79    | 0.92     | 2.58     | 2.90      |       |
|                    |                       | white tailed deer     | -9.63     | -9.14    | -6.63    | -4.36    | -3.95     |       |
|                    |                       | woodchuck             | -5.37     | -4.11    | 0.84     | 5.37     | 6.34      |       |
|                    |                       | gent X imp            | armadillo | -13.64   | -10.71   | -0.90    | 8.40      | 11.29 |
|                    |                       | bobcat                | -9.30     | -7.43    | -1.21    | 4.95     | 6.69      |       |
|                    |                       | cottontail sp         | -3.83     | -3.39    | -0.95    | 1.49     | 2.02      |       |
|                    | coyote                | -5.95                 | -5.10     | -0.13    | 4.91     | 6.14     |           |       |
|                    | eastern chipmunk      | -20.78                | -16.56    | -0.16    | 16.04    | 20.64    |           |       |
|                    | elk                   | -15.09                | -10.54    | -0.80    | 9.09     | 13.37    |           |       |
|                    | flying squirrel sp    | -10.65                | -8.15     | -0.93    | 6.21     | 8.37     |           |       |
|                    | fox squirrel          | -22.85                | -17.77    | -1.04    | 16.02    | 20.20    |           |       |
|                    | gray fox              | -15.93                | -13.34    | -0.91    | 11.68    | 14.52    |           |       |
|                    | gray squirrel sp      | -4.58                 | -4.10     | -1.84    | 0.42     | 0.80     |           |       |
|                    | mule deer             | -17.59                | -13.67    | -1.06    | 12.12    | 15.58    |           |       |
|                    | north american badger | -10.56                | -7.94     | -0.77    | 6.77     | 9.52     |           |       |
|                    | north american beaver | -11.34                | -9.11     | -1.16    | 6.95     | 9.58     |           |       |
|                    | north american mink   | -12.17                | -9.43     | -0.96    | 7.14     | 9.71     |           |       |
|                    | raccoon               | -1.18                 | -0.64     | 2.02     | 4.73     | 5.27     |           |       |
|                    | red fox               | -12.13                | -10.32    | -1.61    | 7.52     | 9.72     |           |       |
|                    | red squirrel          | -14.05                | -10.74    | -1.25    | 8.54     | 12.38    |           |       |
|                    | striped skunk         | -9.39                 | -7.71     | -0.79    | 5.90     | 7.63     |           |       |
|                    | virginia opossum      | -7.08                 | -6.21     | -2.39    | 1.19     | 1.88     |           |       |
|                    | white tailed deer     | -17.29                | -14.42    | -1.51    | 12.25    | 15.74    |           |       |
|                    | woodchuck             | -10.21                | -8.23     | -0.60    | 6.78     | 8.51     |           |       |
|                    | intercept             | armadillo             | -3.66     | -3.39    | -2.05    | -0.77    | -0.49     |       |
|                    | bobcat                | -2.82                 | -2.79     | -2.60    | -2.42    | -2.39    |           |       |
|                    | cottontail sp         | -0.75                 | -0.74     | -0.69    | -0.65    | -0.64    |           |       |
|                    | coyote                | -1.65                 | -1.64     | -1.59    | -1.53    | -1.52    |           |       |
| eastern chipmunk   | -4.40                 | -4.12                 | -2.88     | -1.81    | -1.62    |          |           |       |
| elk                | -5.31                 | -4.93                 | -3.27     | -1.64    | -1.28    |          |           |       |
| flying squirrel sp | -6.06                 | -5.59                 | -3.64     | -1.91    | -1.53    |          |           |       |

**Table S36:** Species and city-specific detection parameters. Note that all of these species do not likely reside in this city (that is controlled by another level of the model). (continued)

| City | Parameter | Species               | CI(0.025) | CI(0.05) | Estimate | CI(0.95) | CI(0.975) |
|------|-----------|-----------------------|-----------|----------|----------|----------|-----------|
|      |           | fox squirrel          | -3.20     | -3.14    | -2.82    | -2.54    | -2.49     |
|      |           | gray fox              | -4.32     | -4.07    | -2.88    | -1.87    | -1.68     |
|      |           | gray squirrel sp      | -2.61     | -2.52    | -2.08    | -1.68    | -1.62     |
|      |           | mule deer             | -2.08     | -2.03    | -1.81    | -1.59    | -1.55     |
|      |           | north american badger | -5.93     | -5.51    | -3.74    | -2.05    | -1.72     |
|      |           | north american beaver | -6.02     | -5.59    | -3.94    | -2.40    | -2.08     |
|      |           | north american mink   | -6.20     | -5.86    | -4.26    | -2.81    | -2.48     |
|      |           | raccoon               | -3.41     | -3.37    | -3.15    | -2.94    | -2.91     |
|      |           | red fox               | -4.28     | -3.93    | -2.42    | -0.94    | -0.64     |
|      |           | red squirrel          | -4.26     | -3.85    | -2.28    | -0.77    | -0.44     |
|      |           | striped skunk         | -2.42     | -2.40    | -2.27    | -2.15    | -2.13     |
|      |           | virginia opossum      | -2.79     | -2.75    | -2.54    | -2.34    | -2.31     |
|      |           | white tailed deer     | -4.21     | -3.89    | -2.57    | -1.50    | -1.29     |
|      |           | woodchuck             | -4.59     | -4.27    | -2.91    | -1.61    | -1.33     |
|      | gent      | armadillo             | -1.86     | -1.54    | -0.05    | 1.38     | 1.69      |
|      |           | bobcat                | -0.82     | -0.73    | -0.28    | 0.13     | 0.20      |
|      |           | cottontail sp         | 0.01      | 0.04     | 0.23     | 0.41     | 0.44      |
|      |           | coyote                | 0.67      | 0.70     | 0.83     | 0.96     | 0.98      |
|      |           | eastern chipmunk      | -2.59     | -2.32    | -0.96    | 0.30     | 0.53      |
|      |           | elk                   | -3.23     | -2.73    | -0.69    | 1.26     | 1.76      |
|      |           | flying squirrel sp    | -3.30     | -2.90    | -1.10    | 0.70     | 1.08      |
|      |           | fox squirrel          | -0.12     | 0.00     | 0.55     | 1.05     | 1.14      |
|      |           | gray fox              | -6.22     | -5.34    | -1.34    | 2.75     | 3.60      |
|      |           | gray squirrel sp      | -2.29     | -2.06    | -0.99    | -0.10    | 0.06      |
|      |           | mule deer             | -3.76     | -3.43    | -2.05    | -0.83    | -0.59     |
|      |           | north american badger | -2.93     | -2.54    | -0.73    | 1.08     | 1.49      |
|      |           | north american beaver | -2.81     | -2.27    | -0.17    | 1.70     | 2.13      |
|      |           | north american mink   | -2.36     | -1.94    | -0.17    | 1.47     | 1.85      |
|      |           | raccoon               | -1.73     | -1.57    | -0.80    | -0.12    | 0.00      |
|      |           | red fox               | -2.49     | -2.02    | 0.04     | 2.08     | 2.49      |
|      |           | red squirrel          | -3.09     | -2.77    | -1.09    | 0.63     | 1.05      |
|      |           | striped skunk         | -2.06     | -1.90    | -1.04    | -0.35    | -0.22     |
|      |           | virginia opossum      | -2.39     | -2.20    | -1.33    | -0.56    | -0.43     |
|      |           | white tailed deer     | -2.10     | -1.74    | -0.09    | 1.44     | 1.76      |
|      |           | woodchuck             | -2.52     | -2.17    | -0.70    | 0.77     | 1.10      |
|      | imp       | armadillo             | -3.56     | -2.88    | 0.04     | 3.04     | 3.72      |
|      |           | bobcat                | -2.92     | -2.77    | -2.01    | -1.29    | -1.16     |
|      |           | cottontail sp         | 0.20      | 0.23     | 0.41     | 0.59     | 0.62      |
|      |           | coyote                | -0.67     | -0.63    | -0.43    | -0.23    | -0.19     |
|      |           | eastern chipmunk      | -3.05     | -2.33    | 1.38     | 5.27     | 6.10      |
|      |           | elk                   | -6.38     | -4.99    | -0.39    | 4.58     | 6.22      |
|      |           | flying squirrel sp    | -6.00     | -4.71    | -0.12    | 4.76     | 6.04      |
|      |           | fox squirrel          | 0.24      | 0.40     | 1.40     | 2.37     | 2.55      |
|      |           | gray fox              | -6.56     | -5.74    | -1.50    | 2.09     | 2.73      |
|      |           | gray squirrel sp      | -5.75     | -5.40    | -3.81    | -2.35    | -2.10     |
|      |           | mule deer             | 0.83      | 1.02     | 1.96     | 2.89     | 3.07      |
|      |           | north american badger | -5.43     | -4.21    | 0.18     | 5.01     | 6.44      |
|      |           | north american beaver | -7.00     | -5.55    | -0.09    | 5.41     | 6.98      |
|      |           | north american mink   | -3.62     | -2.93    | 0.26     | 3.46     | 4.23      |



**Table S36:** Species and city-specific detection parameters. Note that all of these species do not likely reside in this city (that is controlled by another level of the model). (*continued*)

| City                  | Parameter  | Species               | CI(0.025) | CI(0.05)      | Estimate | CI(0.95) | CI(0.975) |       |       |
|-----------------------|------------|-----------------------|-----------|---------------|----------|----------|-----------|-------|-------|
|                       | gent X imp | raccoon               | -0.41     | -0.29         | 0.35     | 1.00     | 1.11      |       |       |
|                       |            | red fox               | -3.05     | -2.36         | 0.77     | 3.78     | 4.46      |       |       |
|                       |            | red squirrel          | -5.04     | -3.97         | 0.20     | 4.28     | 5.35      |       |       |
|                       |            | striped skunk         | -0.25     | -0.18         | 0.17     | 0.52     | 0.59      |       |       |
|                       |            | virginia opossum      | 1.59      | 1.66          | 2.10     | 2.57     | 2.66      |       |       |
|                       |            | white tailed deer     | -2.67     | -1.90         | 2.41     | 8.12     | 9.57      |       |       |
|                       |            | woodchuck             | -5.11     | -3.94         | 1.06     | 5.87     | 7.06      |       |       |
|                       |            | armadillo             | -13.46    | -10.68        | -0.94    | 8.37     | 11.13     |       |       |
|                       |            | bobcat                | -12.83    | -10.43        | -2.97    | 2.26     | 3.57      |       |       |
|                       |            | cottontail sp         | -20.15    | -18.81        | -11.57   | -2.52    | -1.24     |       |       |
|                       |            | coyote                | -6.28     | -6.04         | -4.81    | -3.77    | -3.57     |       |       |
|                       |            | eastern chipmunk      | -20.74    | -16.94        | -0.70    | 15.70    | 19.72     |       |       |
|                       |            | elk                   | -15.37    | -10.14        | -0.76    | 8.93     | 13.85     |       |       |
|                       |            | flying squirrel sp    | -10.40    | -7.99         | -0.94    | 6.02     | 8.52      |       |       |
|                       |            | fox squirrel          | 0.82      | 3.07          | 19.90    | 46.36    | 52.23     |       |       |
|                       |            | gray fox              | -16.04    | -13.20        | -1.18    | 10.86    | 14.02     |       |       |
|                       |            | gray squirrel sp      | -5.32     | -4.33         | 0.06     | 4.53     | 5.48      |       |       |
|                       |            | mule deer             | -10.91    | -8.75         | 1.08     | 14.87    | 18.71     |       |       |
|                       |            | north american badger | -10.92    | -7.92         | -0.74    | 6.47     | 9.12      |       |       |
|                       |            | north american beaver | -11.37    | -9.18         | -1.21    | 6.98     | 9.34      |       |       |
|                       |            | north american mink   | -11.58    | -9.23         | -0.88    | 7.40     | 9.99      |       |       |
|                       |            | raccoon               | -5.86     | -5.29         | -2.41    | 0.23     | 0.77      |       |       |
|                       |            | red fox               | -12.52    | -10.49        | -1.62    | 7.57     | 9.65      |       |       |
|                       |            | red squirrel          | -14.73    | -10.78        | -1.32    | 8.47     | 12.28     |       |       |
|                       |            | striped skunk         | -9.45     | -7.94         | -1.12    | 6.36     | 8.27      |       |       |
|                       |            | virginia opossum      | 1.08      | 1.42          | 3.37     | 5.54     | 6.01      |       |       |
|                       |            | white tailed deer     | -16.45    | -13.91        | -1.34    | 11.35    | 14.32     |       |       |
|                       |            | woodchuck             | -10.20    | -8.19         | -0.49    | 6.94     | 8.87      |       |       |
|                       |            | Washington D.C.       | intercept | armadillo     | -3.67    | -3.38    | -2.06     | -0.79 | -0.52 |
|                       |            |                       |           | bobcat        | -5.86    | -5.52    | -3.94     | -2.42 | -2.11 |
|                       |            |                       |           | cottontail sp | -1.30    | -1.28    | -1.16     | -1.05 | -1.03 |
|                       |            |                       |           | coyote        | -3.68    | -3.60    | -3.26     | -2.94 | -2.89 |
| eastern chipmunk      | -1.42      |                       |           | -1.40         | -1.28    | -1.16    | -1.14     |       |       |
| elk                   | -5.28      |                       |           | -4.90         | -3.25    | -1.64    | -1.30     |       |       |
| flying squirrel sp    | -4.37      |                       |           | -4.18         | -3.29    | -2.54    | -2.42     |       |       |
| fox squirrel          | -3.61      |                       |           | -3.28         | -1.81    | -0.38    | -0.10     |       |       |
| gray fox              | -3.04      |                       |           | -2.93         | -2.42    | -1.98    | -1.91     |       |       |
| gray squirrel sp      | -0.08      |                       |           | -0.07         | -0.03    | 0.01     | 0.02      |       |       |
| mule deer             | -3.45      |                       |           | -3.17         | -1.70    | -0.30    | 0.01      |       |       |
| north american badger | -5.87      |                       |           | -5.44         | -3.68    | -2.02    | -1.68     |       |       |
| north american beaver | -6.14      |                       |           | -5.79         | -4.07    | -2.48    | -2.16     |       |       |
| north american mink   | -6.54      |                       |           | -6.21         | -4.75    | -3.53    | -3.30     |       |       |
| raccoon               | -1.12      |                       |           | -1.11         | -1.06    | -1.01    | -1.01     |       |       |
| red fox               | -1.15      |                       |           | -1.14         | -1.09    | -1.04    | -1.03     |       |       |
| red squirrel          | -4.25      |                       |           | -3.87         | -2.28    | -0.76    | -0.41     |       |       |
| striped skunk         | -5.19      |                       |           | -4.74         | -2.95    | -1.41    | -1.08     |       |       |
| virginia opossum      | -2.27      |                       |           | -2.25         | -2.12    | -1.99    | -1.96     |       |       |
| white tailed deer     | -0.85      |                       |           | -0.84         | -0.79    | -0.74    | -0.73     |       |       |
| woodchuck             | -2.51      | -2.46                 | -2.21     | -1.99         | -1.95    |          |           |       |       |

**Table S36:** Species and city-specific detection parameters. Note that all of these species do not likely reside in this city (that is controlled by another level of the model). (continued)

| City                  | Parameter | Species               | CI(0.025) | CI(0.05)           | Estimate | CI(0.95) | CI(0.975) |      |      |
|-----------------------|-----------|-----------------------|-----------|--------------------|----------|----------|-----------|------|------|
| gent                  |           | armadillo             | -1.88     | -1.54              | -0.03    | 1.36     | 1.67      |      |      |
|                       |           | bobcat                | -2.25     | -1.90              | -0.42    | 1.07     | 1.40      |      |      |
|                       |           | cottontail sp         | -1.00     | -0.95              | -0.73    | -0.51    | -0.47     |      |      |
|                       |           | coyote                | -0.62     | -0.52              | -0.02    | 0.48     | 0.58      |      |      |
|                       |           | eastern chipmunk      | -3.19     | -3.00              | -2.02    | -1.17    | -1.03     |      |      |
|                       |           | elk                   | -3.22     | -2.68              | -0.70    | 1.27     | 1.74      |      |      |
|                       |           | flying squirrel sp    | -3.49     | -3.10              | -1.31    | 0.43     | 0.81      |      |      |
|                       |           | fox squirrel          | -2.22     | -1.85              | -0.11    | 1.50     | 1.83      |      |      |
|                       |           | gray fox              | -6.92     | -6.01              | -2.14    | 2.01     | 3.05      |      |      |
|                       |           | gray squirrel sp      | -0.21     | -0.20              | -0.13    | -0.05    | -0.04     |      |      |
|                       |           | mule deer             | -3.13     | -2.82              | -1.30    | 0.31     | 0.69      |      |      |
|                       |           | north american badger | -2.96     | -2.50              | -0.71    | 1.04     | 1.48      |      |      |
|                       |           | north american beaver | -2.85     | -2.37              | -0.23    | 1.68     | 2.07      |      |      |
|                       |           | north american mink   | -2.02     | -1.70              | -0.23    | 1.14     | 1.41      |      |      |
|                       |           | raccoon               | 0.72      | 0.73               | 0.81     | 0.89     | 0.91      |      |      |
|                       |           | red fox               | -0.21     | -0.19              | -0.10    | -0.02    | 0.00      |      |      |
|                       |           | red squirrel          | -3.14     | -2.74              | -1.10    | 0.68     | 1.08      |      |      |
|                       |           | striped skunk         | -2.28     | -2.02              | -0.72    | 0.57     | 0.85      |      |      |
|                       |           | virginia opossum      | 0.67      | 0.70               | 0.86     | 1.02     | 1.05      |      |      |
|                       |           | white tailed deer     | 0.29      | 0.31               | 0.39     | 0.47     | 0.48      |      |      |
|                       |           | woodchuck             | -2.29     | -2.19              | -1.61    | -1.09    | -0.99     |      |      |
|                       |           | imp                   |           | armadillo          | -3.55    | -2.89    | 0.08      | 3.12 | 3.81 |
|                       |           |                       |           | bobcat             | -6.28    | -5.00    | -0.11     | 5.18 | 6.51 |
|                       |           |                       |           | cottontail sp      | 1.64     | 1.86     | 3.04      | 4.24 | 4.47 |
|                       |           |                       |           | coyote             | -2.38    | -2.06    | -0.31     | 1.44 | 1.78 |
|                       |           |                       |           | eastern chipmunk   | -1.81    | -1.61    | -0.61     | 0.32 | 0.48 |
|                       |           |                       |           | elk                | -6.49    | -5.18    | -0.39     | 4.37 | 5.75 |
|                       |           |                       |           | flying squirrel sp | -3.62    | -2.83    | 0.86      | 5.77 | 7.15 |
|                       |           |                       |           | fox squirrel       | -6.21    | -5.09    | -0.12     | 4.91 | 5.93 |
|                       |           |                       |           | gray fox           | -2.54    | -2.03    | 0.23      | 2.48 | 2.91 |
|                       |           |                       |           | gray squirrel sp   | 1.33     | 1.39     | 1.71      | 2.04 | 2.10 |
|                       |           |                       |           | mule deer          | -3.42    | -2.74    | 0.34      | 3.41 | 4.10 |
| north american badger | -5.73     |                       |           | -4.45              | 0.12     | 4.74     | 6.02      |      |      |
| north american beaver | -7.06     |                       |           | -5.47              | -0.10    | 5.15     | 6.52      |      |      |
| north american mink   | -3.66     |                       |           | -2.96              | 0.15     | 3.28     | 3.97      |      |      |
| raccoon               | 0.81      |                       |           | 0.89               | 1.34     | 1.78     | 1.87      |      |      |
| red fox               | -0.17     |                       |           | -0.10              | 0.33     | 0.75     | 0.82      |      |      |
| red squirrel          | -5.06     |                       |           | -4.02              | 0.26     | 4.46     | 5.49      |      |      |
| striped skunk         | -6.78     |                       |           | -5.55              | 0.51     | 6.37     | 7.80      |      |      |
| virginia opossum      | 0.18      |                       |           | 0.36               | 1.33     | 2.31     | 2.52      |      |      |
| white tailed deer     | -0.87     |                       |           | -0.78              | -0.34    | 0.10     | 0.18      |      |      |
| woodchuck             | 2.95      | 3.43                  | 5.97      | 8.80               | 9.39     |          |           |      |      |
| gent X imp            |           | armadillo             | -13.63    | -10.62             | -0.96    | 8.93     | 11.76     |      |      |
|                       |           | bobcat                | -8.89     | -7.25              | -1.29    | 4.95     | 6.82      |      |      |
|                       |           | cottontail sp         | -1.25     | -0.91              | 0.74     | 2.42     | 2.76      |      |      |
|                       |           | coyote                | 0.66      | 1.21               | 4.04     | 7.03     | 7.63      |      |      |
|                       |           | eastern chipmunk      | 9.55      | 10.21              | 14.04    | 18.21    | 19.10     |      |      |
|                       |           | elk                   | -16.19    | -10.93             | -0.85    | 8.86     | 13.53     |      |      |
|                       |           | flying squirrel sp    | -10.86    | -8.42              | -1.05    | 5.74     | 8.35      |      |      |

**Table S36:** Species and city-specific detection parameters. Note that all of these species do not likely reside in this city (that is controlled by another level of the model). (continued)

| City                  | Parameter             | Species               | CI(0.025) | CI(0.05) | Estimate | CI(0.95) | CI(0.975) |
|-----------------------|-----------------------|-----------------------|-----------|----------|----------|----------|-----------|
| Phoenix, AZ           | intercept             | fox squirrel          | -22.29    | -17.46   | -0.93    | 16.01    | 21.06     |
|                       |                       | gray fox              | -16.70    | -13.79   | -1.15    | 11.10    | 13.91     |
|                       |                       | gray squirrel sp      | -1.51     | -1.41    | -0.89    | -0.39    | -0.29     |
|                       |                       | mule deer             | -16.90    | -13.25   | -1.04    | 11.69    | 15.98     |
|                       |                       | north american badger | -10.52    | -7.94    | -0.78    | 6.72     | 9.54      |
|                       |                       | north american beaver | -11.64    | -9.06    | -1.25    | 6.71     | 9.20      |
|                       |                       | north american mink   | -12.94    | -10.55   | -1.94    | 4.73     | 6.43      |
|                       |                       | raccoon               | -0.23     | -0.11    | 0.49     | 1.08     | 1.21      |
|                       |                       | red fox               | -1.41     | -1.29    | -0.66    | -0.02    | 0.10      |
|                       |                       | red squirrel          | -13.94    | -10.59   | -1.35    | 8.33     | 12.08     |
|                       |                       | striped skunk         | -9.20     | -7.60    | -0.68    | 6.09     | 7.94      |
|                       |                       | virginia opossum      | -1.86     | -1.63    | -0.53    | 0.57     | 0.80      |
|                       |                       | white tailed deer     | 0.33      | 0.45     | 1.06     | 1.67     | 1.79      |
|                       |                       | woodchuck             | -9.79     | -9.02    | -5.11    | -1.51    | -0.76     |
|                       |                       | armadillo             | -3.68     | -3.38    | -2.06    | -0.75    | -0.46     |
|                       |                       | bobcat                | -2.56     | -2.53    | -2.35    | -2.19    | -2.16     |
|                       |                       | cottontail sp         | 0.05      | 0.06     | 0.12     | 0.17     | 0.18      |
|                       |                       | coyote                | -1.17     | -1.16    | -1.11    | -1.07    | -1.06     |
|                       |                       | eastern chipmunk      | -3.70     | -3.42    | -2.06    | -0.70    | -0.42     |
|                       |                       | elk                   | -5.35     | -4.96    | -3.26    | -1.67    | -1.33     |
|                       | flying squirrel sp    | -5.80                 | -5.44     | -3.55    | -1.87    | -1.50    |           |
|                       | fox squirrel          | -3.59                 | -3.27     | -1.81    | -0.43    | -0.16    |           |
|                       | gray fox              | -3.90                 | -3.78     | -3.19    | -2.71    | -2.63    |           |
|                       | gray squirrel sp      | -2.31                 | -2.05     | -0.77    | 0.47     | 0.73     |           |
|                       | mule deer             | -3.92                 | -3.78     | -3.04    | -2.27    | -2.10    |           |
|                       | north american badger | -4.36                 | -4.11     | -2.80    | -1.89    | -1.73    |           |
|                       | north american beaver | -5.75                 | -5.45     | -3.97    | -2.57    | -2.29    |           |
|                       | north american mink   | -6.19                 | -5.83     | -4.22    | -2.77    | -2.47    |           |
|                       | raccoon               | -3.08                 | -3.05     | -2.87    | -2.71    | -2.68    |           |
|                       | red fox               | -4.23                 | -3.92     | -2.40    | -0.94    | -0.65    |           |
|                       | red squirrel          | -4.25                 | -3.87     | -2.33    | -0.84    | -0.48    |           |
|                       | striped skunk         | -3.33                 | -3.23     | -2.73    | -2.32    | -2.25    |           |
|                       | virginia opossum      | -3.22                 | -2.98     | -1.84    | -0.73    | -0.48    |           |
|                       | white tailed deer     | -4.28                 | -3.97     | -2.57    | -1.40    | -1.20    |           |
|                       | woodchuck             | -4.61                 | -4.28     | -2.91    | -1.61    | -1.32    |           |
|                       | armadillo             | -1.97                 | -1.58     | -0.04    | 1.39     | 1.71     |           |
|                       | bobcat                | -0.83                 | -0.78     | -0.52    | -0.26    | -0.21    |           |
|                       | cottontail sp         | -0.21                 | -0.20     | -0.13    | -0.06    | -0.04    |           |
|                       | coyote                | -0.28                 | -0.27     | -0.20    | -0.13    | -0.12    |           |
|                       | eastern chipmunk      | -2.91                 | -2.46     | -0.73    | 0.98     | 1.40     |           |
| elk                   | -3.14                 | -2.66                 | -0.69     | 1.30     | 1.78     |          |           |
| flying squirrel sp    | -3.31                 | -2.89                 | -1.11     | 0.67     | 1.06     |          |           |
| fox squirrel          | -2.18                 | -1.82                 | -0.08     | 1.53     | 1.87     |          |           |
| gray fox              | 0.92                  | 1.00                  | 1.50      | 2.09     | 2.22     |          |           |
| gray squirrel sp      | -1.87                 | -1.63                 | -0.35     | 0.92     | 1.18     |          |           |
| mule deer             | -2.84                 | -2.60                 | -1.52     | -0.48    | -0.29    |          |           |
| north american badger | -2.16                 | -1.92                 | -0.86     | 0.30     | 0.55     |          |           |
| north american beaver | -1.62                 | -1.30                 | 0.21      | 1.75     | 2.09     |          |           |
| north american mink   | -2.34                 | -1.94                 | -0.17     | 1.50     | 1.83     |          |           |
|                       | gent                  |                       |           |          |          |          |           |

**Table S36:** Species and city-specific detection parameters. Note that all of these species do not likely reside in this city (that is controlled by another level of the model). (continued)

| City | Parameter             | Species            | CI(0.025)             | CI(0.05) | Estimate | CI(0.95) | CI(0.975) |      |
|------|-----------------------|--------------------|-----------------------|----------|----------|----------|-----------|------|
|      | imp                   | raccoon            | 0.94                  | 0.97     | 1.17     | 1.37     | 1.41      |      |
|      |                       | red fox            | -2.42                 | -1.94    | 0.09     | 2.08     | 2.52      |      |
|      |                       | red squirrel       | -3.18                 | -2.79    | -1.10    | 0.65     | 1.06      |      |
|      |                       | striped skunk      | -1.27                 | -1.14    | -0.50    | 0.12     | 0.25      |      |
|      |                       | virginia opossum   | -1.46                 | -1.21    | 0.00     | 1.14     | 1.39      |      |
|      |                       | white tailed deer  | -2.24                 | -1.86    | -0.20    | 1.35     | 1.66      |      |
|      |                       | woodchuck          | -2.45                 | -2.14    | -0.69    | 0.77     | 1.12      |      |
|      |                       | armadillo          | -3.55                 | -2.89    | 0.11     | 3.16     | 3.88      |      |
|      |                       | bobcat             | 0.07                  | 0.22     | 0.92     | 1.60     | 1.73      |      |
|      |                       | cottontail sp      | 2.05                  | 2.09     | 2.33     | 2.56     | 2.61      |      |
|      |                       | coyote             | -1.47                 | -1.42    | -1.20    | -0.99    | -0.95     |      |
|      |                       | eastern chipmunk   | -5.94                 | -4.85    | 0.07     | 5.00     | 5.96      |      |
|      |                       | elk                | -6.36                 | -5.07    | -0.37    | 4.80     | 6.29      |      |
|      |                       | flying squirrel sp | -5.90                 | -4.71    | -0.11    | 4.66     | 5.80      |      |
|      |                       | fox squirrel       | -6.11                 | -5.11    | -0.07    | 4.91     | 6.10      |      |
|      |                       | gray fox           | -7.06                 | -6.59    | -4.35    | -2.50    | -2.19     |      |
|      |                       | gray squirrel sp   | -2.70                 | -2.02    | 1.28     | 4.47     | 5.18      |      |
|      |                       | mule deer          | -1.87                 | -1.38    | 1.30     | 4.18     | 4.90      |      |
|      |                       | gent X imp         | north american badger | -7.77    | -6.72    | -1.90    | 1.45      | 2.08 |
|      |                       |                    | north american beaver | -6.89    | -5.49    | -0.01    | 5.80      | 7.18 |
|      | north american mink   |                    | -3.60                 | -2.85    | 0.24     | 3.47     | 4.25      |      |
|      | raccoon               |                    | -0.60                 | -0.46    | 0.24     | 0.93     | 1.05      |      |
|      | red fox               |                    | -3.15                 | -2.40    | 0.77     | 3.80     | 4.48      |      |
|      | red squirrel          |                    | -5.24                 | -4.17    | 0.28     | 4.42     | 5.55      |      |
|      | striped skunk         |                    | -7.65                 | -7.31    | -5.37    | -3.78    | -3.50     |      |
|      | virginia opossum      |                    | -3.00                 | -2.34    | 0.75     | 3.76     | 4.37      |      |
|      | white tailed deer     |                    | -1.81                 | -1.08    | 3.03     | 8.17     | 9.26      |      |
|      | woodchuck             |                    | -5.29                 | -4.11    | 1.00     | 5.80     | 7.00      |      |
|      | armadillo             |                    | -13.73                | -10.77   | -0.99    | 8.92     | 11.73     |      |
|      | bobcat                |                    | -5.13                 | -4.93    | -3.75    | -2.61    | -2.39     |      |
|      | cottontail sp         |                    | -1.72                 | -1.66    | -1.32    | -1.00    | -0.94     |      |
|      | coyote                |                    | -0.38                 | -0.33    | -0.01    | 0.31     | 0.37      |      |
|      | eastern chipmunk      |                    | -21.53                | -17.09   | -0.41    | 15.46    | 19.66     |      |
|      | elk                   |                    | -15.67                | -11.15   | -0.84    | 8.31     | 12.76     |      |
|      | flying squirrel sp    |                    | -10.90                | -8.05    | -0.89    | 6.23     | 8.55      |      |
|      | fox squirrel          |                    | -22.00                | -17.20   | -0.80    | 16.07    | 20.64     |      |
|      | gray fox              |                    | 4.19                  | 4.49     | 6.39     | 8.65     | 9.12      |      |
|      | gray squirrel sp      |                    | -5.55                 | -4.53    | 0.04     | 4.48     | 5.40      |      |
|      | mule deer             | -15.49             | -14.63                | -10.38   | -6.27    | -5.53    |           |      |
|      | north american badger | -4.79              | -3.94                 | 0.20     | 4.98     | 5.97     |           |      |
|      | north american beaver | -10.16             | -8.11                 | -0.88    | 7.90     | 10.58    |           |      |
|      | north american mink   | -11.75             | -9.43                 | -0.90    | 7.28     | 9.59     |           |      |
|      | raccoon               | -4.55              | -4.37                 | -3.41    | -2.48    | -2.29    |           |      |
|      | red fox               | -12.29             | -10.43                | -1.54    | 7.37     | 9.27     |           |      |
|      | red squirrel          | -14.16             | -10.87                | -1.43    | 8.57     | 12.43    |           |      |
|      | striped skunk         | -0.24              | 0.25                  | 2.80     | 5.38     | 5.92     |           |      |
|      | virginia opossum      | -6.47              | -5.50                 | -1.17    | 3.34     | 4.34     |           |      |
|      | white tailed deer     | -15.79             | -12.59                | 0.13     | 13.30    | 16.47    |           |      |
|      | woodchuck             | -9.86              | -7.90                 | -0.51    | 6.74     | 8.30     |           |      |

**Table S36:** Species and city-specific detection parameters. Note that all of these species do not likely reside in this city (that is controlled by another level of the model). (continued)

| City               | Parameter             | Species               | CI(0.025)     | CI(0.05) | Estimate | CI(0.95) | CI(0.975) |      |
|--------------------|-----------------------|-----------------------|---------------|----------|----------|----------|-----------|------|
| Portland, Oregon   | intercept             | armadillo             | -3.72         | -3.43    | -2.07    | -0.78    | -0.51     |      |
|                    |                       | bobcat                | -6.34         | -5.96    | -4.27    | -2.63    | -2.33     |      |
|                    |                       | cottontail sp         | -1.65         | -1.62    | -1.45    | -1.29    | -1.26     |      |
|                    |                       | coyote                | -1.85         | -1.82    | -1.66    | -1.51    | -1.48     |      |
|                    |                       | eastern chipmunk      | -3.72         | -3.42    | -2.04    | -0.73    | -0.46     |      |
|                    |                       | elk                   | -5.48         | -5.12    | -3.39    | -1.75    | -1.43     |      |
|                    |                       | flying squirrel sp    | -6.06         | -5.64    | -3.76    | -1.99    | -1.61     |      |
|                    |                       | fox squirrel          | -1.45         | -1.42    | -1.29    | -1.15    | -1.13     |      |
|                    |                       | gray fox              | -5.61         | -5.20    | -3.14    | -1.26    | -0.88     |      |
|                    |                       | gray squirrel sp      | -1.03         | -1.00    | -0.88    | -0.75    | -0.73     |      |
|                    |                       | mule deer             | -1.60         | -1.57    | -1.37    | -1.18    | -1.14     |      |
|                    |                       | north american badger | -5.88         | -5.49    | -3.73    | -2.05    | -1.67     |      |
|                    |                       | north american beaver | -5.88         | -5.57    | -4.09    | -2.65    | -2.34     |      |
|                    |                       | north american mink   | -6.42         | -6.02    | -4.37    | -2.89    | -2.59     |      |
|                    |                       | raccoon               | -2.64         | -2.58    | -2.30    | -2.04    | -1.99     |      |
|                    |                       | red fox               | -4.39         | -4.04    | -2.49    | -1.02    | -0.74     |      |
|                    |                       | red squirrel          | -4.22         | -3.89    | -2.30    | -0.77    | -0.44     |      |
|                    |                       | striped skunk         | -5.22         | -4.99    | -3.76    | -2.62    | -2.41     |      |
|                    |                       | virginia opossum      | -1.79         | -1.72    | -1.39    | -1.08    | -1.03     |      |
|                    |                       | white tailed deer     | -3.30         | -2.98    | -1.52    | -0.20    | 0.05      |      |
|                    |                       | woodchuck             | -4.62         | -4.29    | -2.90    | -1.58    | -1.28     |      |
|                    |                       | gent                  | armadillo     | -1.99    | -1.60    | -0.04    | 1.42      | 1.73 |
|                    |                       |                       | bobcat        | -2.22    | -1.89    | -0.42    | 1.01      | 1.31 |
|                    |                       |                       | cottontail sp | 0.46     | 0.55     | 1.07     | 1.63      | 1.75 |
|                    | coyote                |                       | -1.49         | -1.36    | -0.72    | -0.11    | -0.01     |      |
|                    | eastern chipmunk      |                       | -2.88         | -2.47    | -0.74    | 1.02     | 1.43      |      |
|                    | elk                   |                       | -3.21         | -2.73    | -0.71    | 1.25     | 1.74      |      |
|                    | flying squirrel sp    |                       | -3.30         | -2.90    | -1.10    | 0.69     | 1.08      |      |
|                    | fox squirrel          |                       | 0.58          | 0.69     | 1.19     | 1.70     | 1.79      |      |
|                    | gray fox              |                       | -5.77         | -4.74    | -0.76    | 3.13     | 4.08      |      |
|                    | gray squirrel sp      |                       | 0.03          | 0.12     | 0.59     | 1.06     | 1.14      |      |
|                    | mule deer             |                       | -1.44         | -1.33    | -0.66    | 0.06     | 0.22      |      |
|                    | north american badger |                       | -3.00         | -2.58    | -0.73    | 1.04     | 1.48      |      |
|                    | north american beaver |                       | -2.16         | -1.80    | -0.03    | 1.61     | 1.96      |      |
|                    | north american mink   |                       | -2.35         | -1.91    | -0.21    | 1.44     | 1.86      |      |
|                    | raccoon               |                       | -1.42         | -1.24    | -0.36    | 0.46     | 0.63      |      |
|                    | red fox               |                       | -2.49         | -2.04    | 0.04     | 2.07     | 2.49      |      |
|                    | red squirrel          |                       | -3.14         | -2.77    | -1.09    | 0.62     | 1.00      |      |
|                    | striped skunk         |                       | -1.79         | -1.55    | -0.44    | 0.73     | 0.95      |      |
|                    | virginia opossum      |                       | 0.10          | 0.21     | 0.78     | 1.38     | 1.50      |      |
|                    | white tailed deer     |                       | -2.07         | -1.72    | -0.08    | 1.45     | 1.79      |      |
|                    | woodchuck             |                       | -2.51         | -2.19    | -0.71    | 0.74     | 1.05      |      |
|                    | imp                   |                       | armadillo     | -3.65    | -2.94    | 0.08     | 3.10      | 3.90 |
|                    |                       | bobcat                | -5.85         | -4.72    | 0.10     | 5.42     | 6.67      |      |
|                    |                       | cottontail sp         | -2.63         | -2.36    | -1.01    | 0.32     | 0.55      |      |
|                    |                       | coyote                | -0.18         | 0.03     | 1.18     | 2.43     | 2.66      |      |
| eastern chipmunk   |                       | -5.96                 | -4.97         | 0.08     | 5.06     | 6.18     |           |      |
| elk                |                       | -6.18                 | -5.04         | -0.31    | 4.69     | 6.15     |           |      |
| flying squirrel sp |                       | -5.79                 | -4.68         | -0.09    | 4.89     | 6.28     |           |      |

**Table S36:** Species and city-specific detection parameters. Note that all of these species do not likely reside in this city (that is controlled by another level of the model). (continued)

| City          | Parameter  | Species               | CI(0.025) | CI(0.05) | Estimate | CI(0.95) | CI(0.975) |
|---------------|------------|-----------------------|-----------|----------|----------|----------|-----------|
|               |            | fox squirrel          | -0.60     | -0.38    | 0.81     | 2.02     | 2.27      |
|               |            | gray fox              | -5.06     | -4.05    | 0.35     | 4.64     | 5.70      |
|               |            | gray squirrel sp      | -1.22     | -1.04    | -0.09    | 0.86     | 1.06      |
|               |            | mule deer             | -1.40     | -1.13    | 0.27     | 1.77     | 2.07      |
|               |            | north american badger | -5.54     | -4.42    | 0.16     | 4.95     | 6.37      |
|               |            | north american beaver | -5.83     | -4.68    | 0.26     | 5.45     | 6.86      |
|               |            | north american mink   | -3.79     | -3.00    | 0.21     | 3.48     | 4.17      |
|               |            | raccoon               | -0.69     | -0.37    | 1.50     | 3.44     | 3.83      |
|               |            | red fox               | -3.06     | -2.39    | 0.77     | 3.85     | 4.57      |
|               |            | red squirrel          | -5.30     | -4.10    | 0.20     | 4.42     | 5.36      |
|               |            | striped skunk         | -3.94     | -3.03    | 2.26     | 7.77     | 8.77      |
|               |            | virginia opossum      | -8.18     | -7.39    | -3.92    | -1.22    | -0.79     |
|               |            | white tailed deer     | -6.07     | -5.05    | -0.28    | 4.69     | 5.93      |
|               |            | woodchuck             | -5.18     | -3.95    | 1.10     | 5.65     | 6.64      |
|               | gent X imp | armadillo             | -13.85    | -10.87   | -0.88    | 8.98     | 11.70     |
|               |            | bobcat                | -9.22     | -7.53    | -1.30    | 4.98     | 6.96      |
|               |            | cottontail sp         | -19.52    | -17.82   | -9.55    | -3.57    | -2.70     |
|               |            | coyote                | -8.94     | -7.68    | -2.54    | 1.67     | 2.48      |
|               |            | eastern chipmunk      | -20.80    | -16.97   | -0.33    | 15.74    | 19.37     |
|               |            | elk                   | -15.99    | -10.94   | -0.83    | 9.10     | 13.64     |
|               |            | flying squirrel sp    | -10.90    | -8.32    | -1.06    | 6.00     | 8.52      |
|               |            | fox squirrel          | -28.62    | -27.06   | -18.79   | -11.29   | -10.03    |
|               |            | gray fox              | -15.89    | -13.12   | -1.07    | 11.22    | 14.03     |
|               |            | gray squirrel sp      | -2.59     | -2.09    | 0.67     | 3.51     | 4.09      |
|               |            | mule deer             | -29.40    | -24.63   | -7.45    | 2.88     | 4.79      |
|               |            | north american badger | -10.79    | -8.13    | -0.79    | 6.30     | 8.73      |
|               |            | north american beaver | -8.79     | -7.14    | -0.60    | 6.70     | 8.74      |
|               |            | north american mink   | -12.23    | -9.50    | -0.99    | 7.05     | 9.35      |
|               |            | raccoon               | -2.12     | -1.22    | 3.28     | 8.28     | 9.24      |
|               |            | red fox               | -12.54    | -10.45   | -1.67    | 7.35     | 9.52      |
|               |            | red squirrel          | -13.76    | -10.32   | -1.29    | 8.80     | 12.06     |
|               |            | striped skunk         | -5.46     | -4.42    | 1.03     | 7.35     | 8.86      |
|               |            | virginia opossum      | -6.44     | -5.74    | -2.24    | 1.16     | 1.86      |
|               |            | white tailed deer     | -16.43    | -13.70   | -1.46    | 11.41    | 14.23     |
|               |            | woodchuck             | -9.97     | -8.02    | -0.57    | 6.93     | 8.50      |
| Rochester, NY | intercept  | armadillo             | -3.72     | -3.39    | -2.07    | -0.73    | -0.48     |
|               |            | bobcat                | -6.00     | -5.61    | -3.96    | -2.42    | -2.07     |
|               |            | cottontail sp         | -2.42     | -2.37    | -2.14    | -1.93    | -1.89     |
|               |            | coyote                | -3.37     | -3.28    | -2.87    | -2.49    | -2.42     |
|               |            | eastern chipmunk      | -1.54     | -1.50    | -1.29    | -1.08    | -1.04     |
|               |            | elk                   | -5.29     | -4.94    | -3.24    | -1.67    | -1.34     |
|               |            | flying squirrel sp    | -1.83     | -1.68    | -1.04    | -0.45    | -0.33     |
|               |            | fox squirrel          | -3.69     | -3.35    | -1.84    | -0.42    | -0.13     |
|               |            | gray fox              | -3.75     | -3.54    | -2.68    | -1.97    | -1.84     |
|               |            | gray squirrel sp      | -0.13     | -0.12    | -0.03    | 0.05     | 0.07      |
|               |            | mule deer             | -3.44     | -3.13    | -1.69    | -0.28    | 0.01      |
|               |            | north american badger | -5.88     | -5.48    | -3.73    | -2.04    | -1.67     |
|               |            | north american beaver | -5.93     | -5.59    | -4.12    | -2.87    | -2.64     |
|               |            | north american mink   | -6.01     | -5.72    | -4.36    | -3.16    | -2.95     |

**Table S36:** Species and city-specific detection parameters. Note that all of these species do not likely reside in this city (that is controlled by another level of the model). (*continued*)

| City | Parameter             | Species             | CI(0.025)             | CI(0.05) | Estimate | CI(0.95) | CI(0.975) |      |
|------|-----------------------|---------------------|-----------------------|----------|----------|----------|-----------|------|
| gent |                       | raccoon             | -1.99                 | -1.97    | -1.84    | -1.71    | -1.68     |      |
|      |                       | red fox             | -1.27                 | -1.25    | -1.15    | -1.04    | -1.02     |      |
|      |                       | red squirrel        | -2.64                 | -2.58    | -2.24    | -1.95    | -1.89     |      |
|      |                       | striped skunk       | -5.30                 | -5.09    | -3.95    | -3.02    | -2.84     |      |
|      |                       | virginia opossum    | -2.52                 | -2.48    | -2.25    | -2.05    | -2.01     |      |
|      |                       | white tailed deer   | -1.32                 | -1.30    | -1.19    | -1.09    | -1.06     |      |
|      |                       | woodchuck           | -2.86                 | -2.79    | -2.43    | -2.09    | -2.04     |      |
|      |                       | armadillo           | -1.98                 | -1.58    | -0.06    | 1.36     | 1.71      |      |
|      |                       | bobcat              | -2.26                 | -1.90    | -0.41    | 1.00     | 1.34      |      |
|      |                       | cottontail sp       | -2.37                 | -1.99    | -0.45    | 0.91     | 1.18      |      |
|      |                       | coyote              | -0.98                 | -0.77    | 0.28     | 1.25     | 1.43      |      |
|      |                       | eastern chipmunk    | -2.05                 | -1.69    | -0.02    | 1.96     | 2.49      |      |
|      |                       | elk                 | -3.11                 | -2.64    | -0.69    | 1.31     | 1.68      |      |
|      |                       | flying squirrel sp  | -3.40                 | -2.98    | -1.17    | 0.63     | 1.04      |      |
|      |                       | fox squirrel        | -2.24                 | -1.83    | -0.13    | 1.49     | 1.83      |      |
|      |                       | gray fox            | -4.18                 | -3.50    | -0.21    | 3.14     | 3.85      |      |
|      |                       | gray squirrel sp    | -1.63                 | -1.57    | -1.28    | -1.01    | -0.95     |      |
|      |                       | mule deer           | -3.19                 | -2.80    | -1.30    | 0.33     | 0.73      |      |
|      | imp                   |                     | north american badger | -2.92    | -2.50    | -0.73    | 1.05      | 1.48 |
|      |                       |                     | north american beaver | -2.90    | -2.40    | -0.30    | 1.60      | 2.01 |
|      |                       | north american mink | -2.45                 | -2.07    | -0.34    | 1.25     | 1.60      |      |
|      |                       | raccoon             | 0.67                  | 0.74     | 1.15     | 1.54     | 1.61      |      |
|      |                       | red fox             | 0.62                  | 0.69     | 1.06     | 1.41     | 1.48      |      |
|      |                       | red squirrel        | -2.84                 | -2.56    | -1.22    | 0.05     | 0.32      |      |
|      |                       | striped skunk       | -2.03                 | -1.78    | -0.59    | 0.53     | 0.75      |      |
|      |                       | virginia opossum    | -0.99                 | -0.83    | -0.11    | 0.55     | 0.68      |      |
|      |                       | white tailed deer   | -0.13                 | -0.04    | 0.43     | 0.90     | 0.98      |      |
|      |                       | woodchuck           | -1.57                 | -1.41    | -0.59    | 0.15     | 0.29      |      |
|      |                       | armadillo           | -3.48                 | -2.89    | 0.08     | 3.11     | 3.89      |      |
|      |                       | bobcat              | -6.38                 | -5.05    | -0.07    | 5.18     | 6.49      |      |
|      |                       | cottontail sp       | -0.70                 | -0.35    | 1.41     | 3.27     | 3.61      |      |
|      |                       | coyote              | -3.88                 | -3.45    | -1.32    | 0.63     | 0.99      |      |
|      |                       | eastern chipmunk    | -8.75                 | -8.46    | -6.82    | -5.28    | -4.95     |      |
|      |                       | elk                 | -6.41                 | -5.04    | -0.36    | 4.58     | 6.04      |      |
|      |                       | flying squirrel sp  | -9.14                 | -7.05    | -1.36    | 2.72     | 3.51      |      |
|      |                       | fox squirrel        | -6.19                 | -5.07    | -0.04    | 4.89     | 5.92      |      |
|      |                       | gray fox            | -3.68                 | -3.09    | 0.38     | 3.95     | 4.63      |      |
|      |                       | gray squirrel sp    | 1.43                  | 1.55     | 2.17     | 2.79     | 2.92      |      |
|      | mule deer             | -3.48               | -2.75                 | 0.30     | 3.30     | 4.02     |           |      |
|      | north american badger | -5.74               | -4.43                 | 0.07     | 4.73     | 6.08     |           |      |
|      | north american beaver | -7.16               | -5.78                 | -0.52    | 4.15     | 5.30     |           |      |
|      | north american mink   | -4.11               | -3.35                 | -0.12    | 2.92     | 3.55     |           |      |
|      | raccoon               | -1.52               | -1.35                 | -0.38    | 0.63     | 0.83     |           |      |
|      | red fox               | 1.48                | 1.62                  | 2.40     | 3.21     | 3.36     |           |      |
|      | red squirrel          | -2.94               | -2.36                 | 0.37     | 3.14     | 3.76     |           |      |
|      | striped skunk         | -4.51               | -3.60                 | 1.06     | 5.81     | 6.85     |           |      |
|      | virginia opossum      | -0.35               | -0.05                 | 1.53     | 3.09     | 3.42     |           |      |
|      | white tailed deer     | 1.89                | 2.05                  | 2.87     | 3.66     | 3.81     |           |      |
|      | woodchuck             | -0.79               | -0.19                 | 2.88     | 6.29     | 7.00     |           |      |

**Table S36:** Species and city-specific detection parameters. Note that all of these species do not likely reside in this city (that is controlled by another level of the model). (continued)

| City        | Parameter             | Species               | CI(0.025) | CI(0.05) | Estimate | CI(0.95) | CI(0.975) |       |
|-------------|-----------------------|-----------------------|-----------|----------|----------|----------|-----------|-------|
| Sanford, FL | gent X imp            | armadillo             | -13.51    | -10.55   | -0.82    | 8.81     | 11.66     |       |
|             |                       | bobcat                | -9.03     | -7.21    | -1.28    | 4.98     | 6.98      |       |
|             |                       | cottontail sp         | -4.23     | -3.42    | 0.20     | 4.15     | 4.90      |       |
|             |                       | coyote                | -6.65     | -5.54    | -0.66    | 4.16     | 5.22      |       |
|             |                       | eastern chipmunk      | 0.96      | 3.54     | 13.42    | 22.12    | 24.12     |       |
|             |                       | elk                   | -15.25    | -10.87   | -0.84    | 8.61     | 12.89     |       |
|             |                       | flying squirrel sp    | -11.90    | -8.93    | -1.23    | 5.55     | 7.73      |       |
|             |                       | fox squirrel          | -22.31    | -17.34   | -0.84    | 16.12    | 20.22     |       |
|             |                       | gray fox              | -6.82     | -5.36    | 2.23     | 9.97     | 11.77     |       |
|             |                       | gray squirrel sp      | -0.78     | -0.59    | 0.39     | 1.35     | 1.54      |       |
|             |                       | mule deer             | -17.24    | -13.63   | -1.18    | 11.80    | 15.62     |       |
|             |                       | north american badger | -10.91    | -8.13    | -0.75    | 6.52     | 9.16      |       |
|             |                       | north american beaver | -12.59    | -10.09   | -1.74    | 5.47     | 7.48      |       |
|             |                       | north american mink   | -13.49    | -10.89   | -1.93    | 5.25     | 7.33      |       |
|             |                       | raccoon               | -11.02    | -10.51   | -8.02    | -5.61    | -5.19     |       |
|             |                       | red fox               | -14.22    | -13.70   | -10.99   | -8.45    | -7.93     |       |
|             |                       | red squirrel          | -13.15    | -11.03   | -3.05    | 3.02     | 4.45      |       |
|             |                       | striped skunk         | -9.78     | -8.09    | -1.25    | 5.16     | 6.66      |       |
|             |                       | virginia opossum      | -5.71     | -5.22    | -2.76    | -0.35    | 0.13      |       |
|             |                       | white tailed deer     | -16.24    | -15.09   | -9.56    | -4.45    | -3.65     |       |
|             |                       | woodchuck             | -1.65     | -1.00    | 2.65     | 6.29     | 6.99      |       |
|             |                       | intercept             | armadillo | -2.29    | -2.24    | -2.01    | -1.80     | -1.76 |
|             |                       |                       | bobcat    | -4.64    | -4.49    | -3.75    | -3.09     | -2.97 |
|             | cottontail sp         |                       | -2.55     | -2.48    | -2.16    | -1.86    | -1.81     |       |
|             | coyote                |                       | -3.29     | -3.20    | -2.81    | -2.47    | -2.41     |       |
|             | eastern chipmunk      |                       | -3.76     | -3.45    | -2.08    | -0.74    | -0.46     |       |
|             | elk                   |                       | -5.24     | -4.90    | -3.28    | -1.66    | -1.30     |       |
|             | flying squirrel sp    |                       | -5.33     | -5.05    | -3.86    | -2.85    | -2.70     |       |
|             | fox squirrel          |                       | -3.66     | -3.35    | -1.82    | -0.41    | -0.11     |       |
|             | gray fox              |                       | -5.79     | -5.45    | -3.77    | -2.53    | -2.33     |       |
|             | gray squirrel sp      |                       | -1.43     | -1.41    | -1.31    | -1.21    | -1.19     |       |
|             | mule deer             |                       | -3.49     | -3.17    | -1.69    | -0.30    | 0.02      |       |
|             | north american badger |                       | -5.78     | -5.43    | -3.69    | -2.00    | -1.65     |       |
|             | north american beaver |                       | -5.98     | -5.62    | -3.95    | -2.40    | -2.07     |       |
|             | north american mink   |                       | -6.31     | -5.97    | -4.33    | -2.83    | -2.52     |       |
|             | raccoon               |                       | -1.84     | -1.81    | -1.63    | -1.46    | -1.42     |       |
|             | red fox               |                       | -2.79     | -2.62    | -1.65    | -0.80    | -0.65     |       |
|             | red squirrel          |                       | -4.23     | -3.88    | -2.29    | -0.75    | -0.47     |       |
|             | striped skunk         |                       | -5.27     | -4.90    | -3.10    | -1.50    | -1.15     |       |
|             | virginia opossum      |                       | -1.62     | -1.58    | -1.35    | -1.14    | -1.10     |       |
|             | white tailed deer     |                       | -2.41     | -2.32    | -1.86    | -1.46    | -1.40     |       |
|             | woodchuck             |                       | -4.57     | -4.26    | -2.90    | -1.59    | -1.32     |       |
| gent        | armadillo             |                       | -0.20     | -0.13    | 0.29     | 0.69     | 0.76      |       |
|             | bobcat                |                       | -0.97     | -0.75    | 0.23     | 1.26     | 1.46      |       |
|             | cottontail sp         | -1.24                 | -1.12     | -0.53    | 0.02     | 0.12     |           |       |
|             | coyote                | -0.82                 | -0.71     | -0.13    | 0.41     | 0.52     |           |       |
|             | eastern chipmunk      | -2.94                 | -2.53     | -0.75    | 1.00     | 1.45     |           |       |
|             | elk                   | -3.15                 | -2.71     | -0.69    | 1.26     | 1.75     |           |       |
|             | flying squirrel sp    | -3.43                 | -3.04     | -1.26    | 0.45     | 0.85     |           |       |



**Table S36:** Species and city-specific detection parameters. Note that all of these species do not likely reside in this city (that is controlled by another level of the model). (continued)

| City | Parameter  | Species               | CI(0.025) | CI(0.05) | Estimate | CI(0.95) | CI(0.975) |
|------|------------|-----------------------|-----------|----------|----------|----------|-----------|
|      |            | fox squirrel          | -2.17     | -1.80    | -0.10    | 1.52     | 1.85      |
|      |            | gray fox              | -6.13     | -5.26    | -1.24    | 2.54     | 3.38      |
|      |            | gray squirrel sp      | -0.38     | -0.34    | -0.13    | 0.07     | 0.10      |
|      |            | mule deer             | -3.12     | -2.82    | -1.31    | 0.31     | 0.66      |
|      |            | north american badger | -2.91     | -2.50    | -0.74    | 1.03     | 1.44      |
|      |            | north american beaver | -2.83     | -2.31    | -0.18    | 1.66     | 2.10      |
|      |            | north american mink   | -2.32     | -1.91    | -0.21    | 1.45     | 1.84      |
|      |            | raccoon               | 0.62      | 0.66     | 0.89     | 1.13     | 1.17      |
|      |            | red fox               | -1.46     | -1.25    | -0.16    | 0.92     | 1.14      |
|      |            | red squirrel          | -3.17     | -2.81    | -1.11    | 0.64     | 1.03      |
|      |            | striped skunk         | -2.35     | -2.06    | -0.71    | 0.58     | 0.84      |
|      |            | virginia opossum      | -0.61     | -0.54    | -0.21    | 0.11     | 0.17      |
|      |            | white tailed deer     | -2.47     | -2.26    | -1.24    | -0.40    | -0.26     |
|      |            | woodchuck             | -2.46     | -2.14    | -0.70    | 0.75     | 1.09      |
|      | imp        | armadillo             | -2.15     | -1.79    | -0.01    | 1.82     | 2.21      |
|      |            | bobcat                | -5.33     | -4.51    | -0.85    | 2.60     | 3.30      |
|      |            | cottontail sp         | -2.52     | -2.10    | -0.03    | 1.97     | 2.35      |
|      |            | coyote                | -1.58     | -1.23    | 0.55     | 2.36     | 2.72      |
|      |            | eastern chipmunk      | -5.98     | -4.91    | 0.12     | 5.35     | 6.32      |
|      |            | elk                   | -6.45     | -5.22    | -0.40    | 4.57     | 5.95      |
|      |            | flying squirrel sp    | -5.78     | -4.53    | -0.12    | 4.37     | 5.53      |
|      |            | fox squirrel          | -6.39     | -5.29    | -0.13    | 4.84     | 5.96      |
|      |            | gray fox              | -5.07     | -3.92    | 0.41     | 4.75     | 5.84      |
|      |            | gray squirrel sp      | -0.59     | -0.43    | 0.42     | 1.28     | 1.44      |
|      |            | mule deer             | -3.34     | -2.68    | 0.31     | 3.41     | 4.06      |
|      |            | north american badger | -5.74     | -4.48    | 0.06     | 4.54     | 5.87      |
|      |            | north american beaver | -6.88     | -5.51    | -0.04    | 5.36     | 6.87      |
|      |            | north american mink   | -3.74     | -2.96    | 0.25     | 3.32     | 4.15      |
|      |            | raccoon               | -4.57     | -4.28    | -2.73    | -1.34    | -1.08     |
|      |            | red fox               | -3.80     | -3.10    | 0.02     | 2.86     | 3.42      |
|      |            | red squirrel          | -5.14     | -4.09    | 0.19     | 4.44     | 5.52      |
|      |            | striped skunk         | -6.83     | -5.53    | 0.52     | 6.32     | 7.53      |
|      |            | virginia opossum      | -0.97     | -0.64    | 0.95     | 2.53     | 2.81      |
|      |            | white tailed deer     | -7.28     | -6.72    | -4.13    | -1.77    | -1.36     |
|      |            | woodchuck             | -5.07     | -3.93    | 1.04     | 5.66     | 6.75      |
|      | gent X imp | armadillo             | 0.83      | 1.31     | 4.05     | 6.91     | 7.51      |
|      |            | bobcat                | -8.85     | -7.56    | -2.40    | 1.93     | 2.70      |
|      |            | cottontail sp         | -4.66     | -4.04    | -1.11    | 2.02     | 2.63      |
|      |            | coyote                | -4.40     | -3.88    | -1.24    | 1.23     | 1.69      |
|      |            | eastern chipmunk      | -20.82    | -16.84   | -0.39    | 15.68    | 19.98     |
|      |            | elk                   | -15.38    | -10.39   | -0.74    | 8.84     | 14.37     |
|      |            | flying squirrel sp    | -9.85     | -7.65    | -0.96    | 6.01     | 8.30      |
|      |            | fox squirrel          | -21.92    | -17.36   | -0.88    | 15.90    | 20.35     |
|      |            | gray fox              | -15.67    | -12.83   | -0.99    | 11.26    | 14.19     |
|      |            | gray squirrel sp      | -1.42     | -1.19    | 0.01     | 1.20     | 1.43      |
|      |            | mule deer             | -17.46    | -13.63   | -1.08    | 11.82    | 15.65     |
|      |            | north american badger | -11.16    | -8.26    | -0.79    | 6.53     | 9.41      |
|      |            | north american beaver | -11.37    | -9.17    | -1.24    | 6.97     | 9.55      |
|      |            | north american mink   | -11.83    | -9.54    | -1.01    | 7.35     | 9.73      |

**Table S36:** Species and city-specific detection parameters. Note that all of these species do not likely reside in this city (that is controlled by another level of the model). (continued)

| City                  | Parameter             | Species               | CI(0.025) | CI(0.05) | Estimate | CI(0.95) | CI(0.975) |
|-----------------------|-----------------------|-----------------------|-----------|----------|----------|----------|-----------|
| Salt Lake City, UT    | intercept             | raccoon               | 2.31      | 2.58     | 4.17     | 5.86     | 6.20      |
|                       |                       | red fox               | -9.31     | -8.40    | -3.76    | 0.43     | 1.21      |
|                       |                       | red squirrel          | -14.09    | -10.94   | -1.36    | 8.90     | 12.50     |
|                       |                       | striped skunk         | -9.00     | -7.63    | -0.73    | 5.89     | 7.58      |
|                       |                       | virginia opossum      | -1.16     | -0.79    | 1.05     | 2.94     | 3.32      |
|                       |                       | white tailed deer     | -12.15    | -10.98   | -5.65    | -1.19    | -0.37     |
|                       |                       | woodchuck             | -9.64     | -8.07    | -0.55    | 6.74     | 8.43      |
|                       |                       | armadillo             | -3.73     | -3.43    | -2.07    | -0.78    | -0.51     |
|                       |                       | bobcat                | -4.67     | -4.53    | -3.77    | -3.06    | -2.92     |
|                       |                       | cottontail sp         | -3.10     | -2.95    | -2.21    | -1.54    | -1.43     |
|                       |                       | coyote                | -2.82     | -2.76    | -2.45    | -2.16    | -2.11     |
|                       |                       | eastern chipmunk      | -3.73     | -3.45    | -2.08    | -0.70    | -0.40     |
|                       |                       | elk                   | -4.28     | -4.01    | -2.89    | -1.95    | -1.80     |
|                       |                       | flying squirrel sp    | -6.00     | -5.56    | -3.71    | -2.02    | -1.67     |
|                       |                       | fox squirrel          | -4.46     | -4.08    | -2.48    | -1.18    | -0.95     |
|                       |                       | gray fox              | -5.73     | -5.27    | -3.19    | -1.28    | -0.88     |
|                       |                       | gray squirrel sp      | -2.33     | -2.07    | -0.79    | 0.48     | 0.71      |
|                       |                       | mule deer             | -0.79     | -0.77    | -0.66    | -0.56    | -0.54     |
|                       |                       | north american badger | -5.55     | -5.24    | -3.78    | -2.53    | -2.31     |
|                       |                       | north american beaver | -3.38     | -3.19    | -2.30    | -1.51    | -1.38     |
|                       | north american mink   | -6.32                 | -5.98     | -4.32    | -2.84    | -2.50    |           |
|                       | raccoon               | -2.04                 | -2.01     | -1.81    | -1.62    | -1.58    |           |
|                       | red fox               | -3.48                 | -3.32     | -2.62    | -2.04    | -1.94    |           |
|                       | red squirrel          | -2.61                 | -2.49     | -1.89    | -1.36    | -1.25    |           |
|                       | striped skunk         | -2.21                 | -2.16     | -1.92    | -1.68    | -1.63    |           |
|                       | virginia opossum      | -3.21                 | -2.96     | -1.84    | -0.74    | -0.52    |           |
|                       | white tailed deer     | -3.24                 | -2.95     | -1.53    | -0.15    | 0.14     |           |
|                       | woodchuck             | -4.58                 | -4.25     | -2.91    | -1.62    | -1.33    |           |
|                       | armadillo             | -1.95                 | -1.59     | -0.05    | 1.41     | 1.73     |           |
|                       | bobcat                | -2.32                 | -1.94     | -0.45    | 0.98     | 1.30     |           |
|                       | cottontail sp         | -2.05                 | -1.73     | -0.27    | 1.15     | 1.47     |           |
|                       | coyote                | -0.98                 | -0.75     | 0.40     | 1.56     | 1.83     |           |
|                       | eastern chipmunk      | -2.92                 | -2.49     | -0.74    | 1.03     | 1.41     |           |
|                       | elk                   | -3.21                 | -2.72     | -0.68    | 1.25     | 1.72     |           |
|                       | flying squirrel sp    | -3.30                 | -2.92     | -1.09    | 0.66     | 1.07     |           |
|                       | fox squirrel          | -2.19                 | -1.82     | -0.13    | 1.49     | 1.84     |           |
|                       | gray fox              | -5.58                 | -4.64     | -0.64    | 3.24     | 4.12     |           |
|                       | gray squirrel sp      | -1.88                 | -1.62     | -0.35    | 0.87     | 1.13     |           |
|                       | mule deer             | -2.82                 | -2.58     | -1.41    | -0.28    | -0.06    |           |
|                       | north american badger | -2.91                 | -2.51     | -0.72    | 1.06     | 1.44     |           |
| north american beaver | -2.30                 | -1.89                 | -0.05     | 1.68     | 2.04     |          |           |
| north american mink   | -2.29                 | -1.92                 | -0.18     | 1.51     | 1.93     |          |           |
| raccoon               | -1.44                 | -1.25                 | -0.33     | 0.50     | 0.65     |          |           |
| red fox               | -1.39                 | -1.18                 | 0.01      | 1.19     | 1.41     |          |           |
| red squirrel          | -3.19                 | -2.81                 | -1.13     | 0.56     | 0.93     |          |           |
| striped skunk         | -1.86                 | -1.62                 | -0.53     | 0.58     | 0.82     |          |           |
| virginia opossum      | -1.41                 | -1.16                 | 0.00      | 1.12     | 1.36     |          |           |
| white tailed deer     | -2.02                 | -1.68                 | -0.05     | 1.47     | 1.78     |          |           |
| woodchuck             | -2.50                 | -2.17                 | -0.70     | 0.77     | 1.08     |          |           |
| gent                  |                       | raccoon               |           |          |          |          |           |
|                       |                       | red fox               |           |          |          |          |           |
|                       |                       | red squirrel          |           |          |          |          |           |
|                       |                       | striped skunk         |           |          |          |          |           |
|                       |                       | virginia opossum      |           |          |          |          |           |
|                       |                       | white tailed deer     |           |          |          |          |           |
|                       |                       | woodchuck             |           |          |          |          |           |
|                       |                       | armadillo             |           |          |          |          |           |
|                       |                       | bobcat                |           |          |          |          |           |
|                       |                       | cottontail sp         |           |          |          |          |           |
|                       |                       | coyote                |           |          |          |          |           |
|                       |                       | eastern chipmunk      |           |          |          |          |           |
|                       |                       | elk                   |           |          |          |          |           |
|                       |                       | flying squirrel sp    |           |          |          |          |           |
|                       |                       | fox squirrel          |           |          |          |          |           |
|                       |                       | gray fox              |           |          |          |          |           |
|                       |                       | gray squirrel sp      |           |          |          |          |           |
|                       |                       | mule deer             |           |          |          |          |           |
|                       |                       | north american badger |           |          |          |          |           |
|                       |                       | north american beaver |           |          |          |          |           |
| north american mink   |                       |                       |           |          |          |          |           |

**Table S36:** Species and city-specific detection parameters. Note that all of these species do not likely reside in this city (that is controlled by another level of the model). (continued)

| City              | Parameter             | Species               | CI(0.025) | CI(0.05) | Estimate | CI(0.95) | CI(0.975) |       |
|-------------------|-----------------------|-----------------------|-----------|----------|----------|----------|-----------|-------|
|                   | imp                   | armadillo             | -3.60     | -2.89    | 0.07     | 3.08     | 3.73      |       |
|                   |                       | bobcat                | -5.57     | -4.60    | -0.25    | 4.21     | 5.28      |       |
|                   |                       | cottontail sp         | -4.39     | -3.57    | 1.02     | 5.69     | 6.54      |       |
|                   |                       | coyote                | -2.25     | -1.88    | 0.17     | 2.13     | 2.50      |       |
|                   |                       | eastern chipmunk      | -5.93     | -4.89    | 0.14     | 5.06     | 6.15      |       |
|                   |                       | elk                   | -7.88     | -6.22    | -1.02    | 3.18     | 4.14      |       |
|                   |                       | flying squirrel sp    | -5.70     | -4.50    | -0.08    | 4.62     | 6.00      |       |
|                   |                       | fox squirrel          | -6.38     | -5.50    | -1.35    | 2.62     | 3.30      |       |
|                   |                       | gray fox              | -4.89     | -4.00    | 0.39     | 4.84     | 5.92      |       |
|                   |                       | gray squirrel sp      | -2.79     | -2.00    | 1.28     | 4.49     | 5.10      |       |
|                   |                       | mule deer             | -2.29     | -2.15    | -1.40    | -0.71    | -0.57     |       |
|                   |                       | north american badger | -5.47     | -4.23    | 0.15     | 4.62     | 5.82      |       |
|                   |                       | north american beaver | -7.43     | -6.62    | -2.81    | 0.10     | 0.62      |       |
|                   |                       | north american mink   | -3.61     | -2.92    | 0.26     | 3.43     | 4.19      |       |
|                   |                       | raccoon               | 0.21      | 0.38     | 1.23     | 2.05     | 2.21      |       |
|                   |                       | red fox               | -0.20     | 0.12     | 1.69     | 3.47     | 3.81      |       |
|                   |                       | red squirrel          | -5.97     | -4.90    | -0.33    | 3.59     | 4.46      |       |
|                   |                       | striped skunk         | -1.78     | -1.43    | 0.09     | 1.45     | 1.67      |       |
|                   |                       | virginia opossum      | -3.09     | -2.37    | 0.73     | 3.86     | 4.49      |       |
|                   |                       | white tailed deer     | -6.14     | -5.07    | -0.28    | 4.74     | 5.91      |       |
|                   |                       | woodchuck             | -5.27     | -4.02    | 1.05     | 5.86     | 6.84      |       |
|                   |                       | gent X imp            | armadillo | -13.57   | -10.48   | -0.85    | 8.69      | 11.57 |
|                   |                       |                       | bobcat    | -9.20    | -7.42    | -1.55    | 4.15      | 5.84  |
|                   | cottontail sp         |                       | -12.96    | -10.99   | -2.34    | 6.17     | 8.20      |       |
|                   | coyote                |                       | -2.25     | -1.56    | 1.93     | 5.80     | 6.53      |       |
|                   | eastern chipmunk      |                       | -21.21    | -16.91   | -0.50    | 15.74    | 19.55     |       |
|                   | elk                   |                       | -14.55    | -10.43   | -0.79    | 9.01     | 13.84     |       |
|                   | flying squirrel sp    |                       | -10.33    | -7.90    | -0.96    | 6.03     | 8.41      |       |
|                   | fox squirrel          |                       | -23.82    | -19.15   | -2.46    | 14.46    | 19.12     |       |
|                   | gray fox              |                       | -16.81    | -13.67   | -1.18    | 11.25    | 14.20     |       |
|                   | gray squirrel sp      |                       | -5.39     | -4.48    | -0.03    | 4.43     | 5.45      |       |
|                   | mule deer             |                       | -0.60     | 0.03     | 3.45     | 6.86     | 7.57      |       |
|                   | north american badger |                       | -10.65    | -8.08    | -0.75    | 6.49     | 9.14      |       |
|                   | north american beaver | -6.98                 | -5.83     | -0.55    | 4.84     | 5.96     |           |       |
|                   | north american mink   | -11.92                | -9.43     | -1.12    | 7.14     | 9.30     |           |       |
| raccoon           | -1.34                 | -0.88                 | 1.36      | 3.78     | 4.27     |          |           |       |
| red fox           | -2.07                 | -1.46                 | 1.72      | 4.86     | 5.47     |          |           |       |
| red squirrel      | -14.96                | -11.61                | -1.74     | 7.46     | 10.76    |          |           |       |
| striped skunk     | -2.13                 | -1.59                 | 1.33      | 4.36     | 4.96     |          |           |       |
| virginia opossum  | -6.60                 | -5.58                 | -1.15     | 3.26     | 4.22     |          |           |       |
| white tailed deer | -16.67                | -14.24                | -1.52     | 11.05    | 13.97    |          |           |       |
| woodchuck         | -10.18                | -8.09                 | -0.51     | 6.89     | 8.53     |          |           |       |
| Seattle, WA       | intercept             | armadillo             | -3.69     | -3.39    | -2.07    | -0.75    | -0.46     |       |
|                   |                       | bobcat                | -5.50     | -5.34    | -4.56    | -3.86    | -3.74     |       |
|                   |                       | cottontail sp         | -1.88     | -1.86    | -1.76    | -1.67    | -1.65     |       |
|                   |                       | coyote                | -2.45     | -2.43    | -2.33    | -2.23    | -2.21     |       |
|                   |                       | eastern chipmunk      | -3.72     | -3.39    | -2.04    | -0.70    | -0.45     |       |
|                   |                       | elk                   | -5.02     | -4.67    | -3.29    | -2.09    | -1.87     |       |
|                   |                       | flying squirrel sp    | -5.36     | -5.08    | -3.77    | -2.65    | -2.46     |       |

**Table S36:** Species and city-specific detection parameters. Note that all of these species do not likely reside in this city (that is controlled by another level of the model). (continued)

| City | Parameter | Species               | CI(0.025) | CI(0.05) | Estimate | CI(0.95) | CI(0.975) |
|------|-----------|-----------------------|-----------|----------|----------|----------|-----------|
|      |           | fox squirrel          | -3.63     | -3.29    | -1.83    | -0.40    | -0.13     |
|      |           | gray fox              | -5.36     | -4.93    | -2.96    | -1.07    | -0.71     |
|      |           | gray squirrel sp      | -1.35     | -1.34    | -1.27    | -1.20    | -1.19     |
|      |           | mule deer             | -2.12     | -2.08    | -1.87    | -1.66    | -1.62     |
|      |           | north american badger | -5.93     | -5.50    | -3.71    | -2.04    | -1.69     |
|      |           | north american beaver | -6.13     | -5.72    | -4.04    | -2.45    | -2.14     |
|      |           | north american mink   | -6.29     | -5.93    | -4.28    | -2.77    | -2.46     |
|      |           | raccoon               | -2.38     | -2.36    | -2.23    | -2.10    | -2.08     |
|      |           | red fox               | -4.28     | -3.93    | -2.40    | -0.94    | -0.60     |
|      |           | red squirrel          | -4.20     | -3.86    | -2.29    | -0.79    | -0.45     |
|      |           | striped skunk         | -6.16     | -5.75    | -3.74    | -2.00    | -1.68     |
|      |           | virginia opossum      | -2.13     | -2.11    | -1.96    | -1.82    | -1.79     |
|      |           | white tailed deer     | -3.26     | -2.93    | -1.51    | -0.17    | 0.09      |
|      |           | woodchuck             | -4.58     | -4.28    | -2.92    | -1.60    | -1.32     |
|      | gent      | armadillo             | -1.96     | -1.56    | -0.06    | 1.38     | 1.72      |
|      |           | bobcat                | -2.44     | -2.07    | -0.62    | 0.79     | 1.07      |
|      |           | cottontail sp         | -1.79     | -1.65    | -0.93    | -0.28    | -0.19     |
|      |           | coyote                | -2.69     | -2.49    | -1.38    | -0.34    | -0.16     |
|      |           | eastern chipmunk      | -2.93     | -2.50    | -0.72    | 0.98     | 1.43      |
|      |           | elk                   | -3.17     | -2.73    | -0.74    | 1.30     | 1.76      |
|      |           | flying squirrel sp    | -3.34     | -2.92    | -1.16    | 0.62     | 1.06      |
|      |           | fox squirrel          | -2.20     | -1.80    | -0.11    | 1.52     | 1.86      |
|      |           | gray fox              | -5.49     | -4.60    | -0.64    | 3.32     | 4.35      |
|      |           | gray squirrel sp      | -2.05     | -1.98    | -1.58    | -1.22    | -1.16     |
|      |           | mule deer             | -3.57     | -3.22    | -1.50    | 0.16     | 0.55      |
|      |           | north american badger | -2.92     | -2.51    | -0.73    | 1.03     | 1.45      |
|      |           | north american beaver | -2.82     | -2.33    | -0.16    | 1.73     | 2.16      |
|      |           | north american mink   | -2.35     | -1.92    | -0.19    | 1.51     | 1.89      |
|      |           | raccoon               | -0.15     | -0.09    | 0.21     | 0.49     | 0.55      |
|      |           | red fox               | -2.50     | -2.01    | 0.07     | 2.14     | 2.54      |
|      |           | red squirrel          | -3.18     | -2.77    | -1.11    | 0.59     | 1.04      |
|      |           | striped skunk         | -2.32     | -2.03    | -0.75    | 0.47     | 0.75      |
|      |           | virginia opossum      | -1.57     | -1.36    | -0.37    | 0.50     | 0.67      |
|      |           | white tailed deer     | -2.00     | -1.64    | -0.07    | 1.48     | 1.82      |
|      |           | woodchuck             | -2.50     | -2.16    | -0.70    | 0.74     | 1.08      |
|      | imp       | armadillo             | -3.57     | -2.87    | 0.05     | 3.13     | 3.85      |
|      |           | bobcat                | -2.83     | -2.30    | 0.28     | 2.99     | 3.54      |
|      |           | cottontail sp         | 0.81      | 0.91     | 1.42     | 1.94     | 2.04      |
|      |           | coyote                | 0.92      | 1.03     | 1.54     | 2.08     | 2.19      |
|      |           | eastern chipmunk      | -6.09     | -4.97    | 0.09     | 5.19     | 6.33      |
|      |           | elk                   | -5.73     | -4.87    | -1.06    | 2.20     | 2.83      |
|      |           | flying squirrel sp    | -5.05     | -3.97    | 0.25     | 4.81     | 6.04      |
|      |           | fox squirrel          | -6.02     | -4.91    | -0.05    | 4.84     | 5.86      |
|      |           | gray fox              | -5.24     | -4.25    | 0.31     | 4.70     | 5.71      |
|      |           | gray squirrel sp      | 4.56      | 4.63     | 5.06     | 5.50     | 5.59      |
|      |           | mule deer             | -1.51     | -1.34    | -0.54    | 0.26     | 0.41      |
|      |           | north american badger | -5.73     | -4.45    | 0.17     | 4.82     | 6.24      |
|      |           | north american beaver | -6.99     | -5.60    | -0.08    | 5.27     | 6.68      |
|      |           | north american mink   | -3.78     | -2.97    | 0.25     | 3.39     | 4.18      |

**Table S36:** Species and city-specific detection parameters. Note that all of these species do not likely reside in this city (that is controlled by another level of the model). (continued)

| City                  | Parameter  | Species               | CI(0.025) | CI(0.05)      | Estimate | CI(0.95) | CI(0.975) |       |       |
|-----------------------|------------|-----------------------|-----------|---------------|----------|----------|-----------|-------|-------|
|                       | gent X imp | raccoon               | 4.31      | 4.43          | 5.15     | 5.90     | 6.04      |       |       |
|                       |            | red fox               | -3.03     | -2.36         | 0.80     | 3.85     | 4.52      |       |       |
|                       |            | red squirrel          | -5.17     | -4.16         | 0.23     | 4.41     | 5.56      |       |       |
|                       |            | striped skunk         | -5.31     | -4.26         | 0.99     | 6.08     | 7.16      |       |       |
|                       |            | virginia opossum      | 0.35      | 0.48          | 1.11     | 1.74     | 1.86      |       |       |
|                       |            | white tailed deer     | -6.09     | -4.99         | -0.26    | 4.83     | 6.07      |       |       |
|                       |            | woodchuck             | -4.92     | -3.90         | 1.05     | 5.84     | 6.96      |       |       |
|                       |            | armadillo             | -13.27    | -10.52        | -0.78    | 8.87     | 11.90     |       |       |
|                       |            | bobcat                | -9.45     | -7.60         | -1.57    | 4.37     | 6.10      |       |       |
|                       |            | cottontail sp         | -3.08     | -2.58         | -0.08    | 2.61     | 3.16      |       |       |
|                       |            | coyote                | -4.86     | -4.21         | -0.71    | 2.87     | 3.53      |       |       |
|                       |            | eastern chipmunk      | -20.62    | -16.49        | -0.40    | 15.47    | 19.28     |       |       |
|                       |            | elk                   | -16.03    | -10.83        | -0.83    | 8.87     | 13.76     |       |       |
|                       |            | flying squirrel sp    | -10.83    | -8.27         | -1.08    | 5.81     | 8.10      |       |       |
|                       |            | fox squirrel          | -22.88    | -18.02        | -0.91    | 15.59    | 19.90     |       |       |
|                       |            | gray fox              | -15.90    | -13.00        | -0.93    | 11.70    | 14.66     |       |       |
|                       |            | gray squirrel sp      | 0.38      | 0.61          | 1.97     | 3.35     | 3.61      |       |       |
|                       |            | mule deer             | -19.41    | -15.18        | -1.85    | 11.43    | 15.59     |       |       |
|                       |            | north american badger | -11.40    | -8.17         | -0.79    | 6.48     | 9.49      |       |       |
|                       |            | north american beaver | -11.72    | -9.23         | -1.23    | 6.65     | 9.24      |       |       |
|                       |            | north american mink   | -11.94    | -9.30         | -1.05    | 7.12     | 9.59      |       |       |
|                       |            | raccoon               | -6.61     | -6.39         | -5.11    | -3.80    | -3.56     |       |       |
|                       |            | red fox               | -12.43    | -10.37        | -1.57    | 7.29     | 9.19      |       |       |
|                       |            | red squirrel          | -13.20    | -10.30        | -1.29    | 8.96     | 12.38     |       |       |
|                       |            | striped skunk         | -7.21     | -5.95         | -0.52    | 4.90     | 6.10      |       |       |
|                       |            | virginia opossum      | -5.51     | -4.87         | -1.82    | 1.34     | 2.01      |       |       |
|                       |            | white tailed deer     | -16.26    | -13.72        | -1.31    | 11.45    | 14.19     |       |       |
|                       |            | woodchuck             | -9.80     | -8.06         | -0.47    | 6.95     | 8.88      |       |       |
|                       |            | Saint Louis, MO       | intercept | armadillo     | -2.41    | -2.34    | -1.94     | -1.57 | -1.50 |
|                       |            |                       |           | bobcat        | -6.67    | -6.39    | -4.94     | -3.76 | -3.57 |
|                       |            |                       |           | cottontail sp | -2.57    | -2.54    | -2.40     | -2.27 | -2.25 |
|                       |            |                       |           | coyote        | -3.09    | -3.06    | -2.92     | -2.78 | -2.75 |
| eastern chipmunk      | -3.72      |                       |           | -3.63         | -3.24    | -2.89    | -2.83     |       |       |
| elk                   | -5.32      |                       |           | -4.93         | -3.27    | -1.60    | -1.29     |       |       |
| flying squirrel sp    | -5.82      |                       |           | -5.51         | -3.97    | -2.64    | -2.42     |       |       |
| fox squirrel          | -2.44      |                       |           | -2.41         | -2.26    | -2.11    | -2.08     |       |       |
| gray fox              | -4.06      |                       |           | -3.94         | -3.34    | -2.83    | -2.75     |       |       |
| gray squirrel sp      | 0.15       |                       |           | 0.15          | 0.19     | 0.23     | 0.24      |       |       |
| mule deer             | -3.43      |                       |           | -3.11         | -1.69    | -0.27    | -0.01     |       |       |
| north american badger | -5.93      |                       |           | -5.54         | -3.72    | -2.03    | -1.69     |       |       |
| north american beaver | -6.42      |                       |           | -6.08         | -4.31    | -2.71    | -2.39     |       |       |
| north american mink   | -6.21      |                       |           | -5.98         | -4.85    | -3.88    | -3.71     |       |       |
| raccoon               | -1.10      |                       |           | -1.09         | -1.04    | -1.00    | -0.99     |       |       |
| red fox               | -1.91      |                       |           | -1.89         | -1.78    | -1.68    | -1.66     |       |       |
| red squirrel          | -4.18      |                       |           | -3.86         | -2.30    | -0.78    | -0.50     |       |       |
| striped skunk         | -3.74      |                       |           | -3.63         | -3.13    | -2.69    | -2.62     |       |       |
| virginia opossum      | -1.84      |                       |           | -1.83         | -1.76    | -1.69    | -1.68     |       |       |
| white tailed deer     | -0.98      |                       |           | -0.97         | -0.91    | -0.85    | -0.84     |       |       |
| woodchuck             | -2.70      | -2.64                 | -2.38     | -2.14         | -2.10    |          |           |       |       |

**Table S36:** Species and city-specific detection parameters. Note that all of these species do not likely reside in this city (that is controlled by another level of the model). (continued)

| City                  | Parameter | Species               | CI(0.025) | CI(0.05)           | Estimate | CI(0.95) | CI(0.975) |       |       |
|-----------------------|-----------|-----------------------|-----------|--------------------|----------|----------|-----------|-------|-------|
| gent                  |           | armadillo             | -2.21     | -1.76              | -0.11    | 1.35     | 1.66      |       |       |
|                       |           | bobcat                | -2.40     | -2.03              | -0.53    | 0.83     | 1.18      |       |       |
|                       |           | cottontail sp         | -1.01     | -0.94              | -0.55    | -0.17    | -0.10     |       |       |
|                       |           | coyote                | -0.47     | -0.40              | 0.01     | 0.41     | 0.49      |       |       |
|                       |           | eastern chipmunk      | -2.45     | -2.09              | -0.50    | 1.25     | 1.65      |       |       |
|                       |           | elk                   | -3.17     | -2.69              | -0.69    | 1.23     | 1.74      |       |       |
|                       |           | flying squirrel sp    | -2.86     | -2.51              | -0.89    | 0.76     | 1.11      |       |       |
|                       |           | fox squirrel          | -0.94     | -0.83              | -0.21    | 0.32     | 0.43      |       |       |
|                       |           | gray fox              | -5.09     | -4.55              | -1.84    | 0.78     | 1.30      |       |       |
|                       |           | gray squirrel sp      | 0.51      | 0.54               | 0.70     | 0.86     | 0.90      |       |       |
|                       |           | mule deer             | -3.18     | -2.83              | -1.29    | 0.33     | 0.74      |       |       |
|                       |           | north american badger | -2.94     | -2.53              | -0.72    | 1.06     | 1.49      |       |       |
|                       |           | north american beaver | -2.98     | -2.42              | -0.29    | 1.61     | 2.03      |       |       |
|                       |           | north american mink   | -1.62     | -1.31              | 0.10     | 1.61     | 1.89      |       |       |
|                       |           | raccoon               | 0.47      | 0.50               | 0.66     | 0.83     | 0.86      |       |       |
|                       |           | red fox               | -2.05     | -1.82              | -0.68    | 0.28     | 0.44      |       |       |
|                       |           | red squirrel          | -3.17     | -2.78              | -1.12    | 0.59     | 0.97      |       |       |
|                       |           | striped skunk         | -2.61     | -2.30              | -0.95    | 0.30     | 0.54      |       |       |
|                       |           | virginia opossum      | 0.15      | 0.19               | 0.40     | 0.61     | 0.65      |       |       |
|                       |           | white tailed deer     | 1.68      | 1.73               | 1.96     | 2.20     | 2.25      |       |       |
|                       |           | woodchuck             | -2.78     | -2.51              | -1.19    | 0.04     | 0.26      |       |       |
|                       |           | imp                   |           | armadillo          | -2.04    | -1.79    | -0.54     | 0.61  | 0.81  |
|                       |           |                       |           | bobcat             | -2.92    | -2.22    | 1.40      | 5.45  | 6.31  |
|                       |           |                       |           | cottontail sp      | 1.88     | 1.96     | 2.41      | 2.84  | 2.93  |
|                       |           |                       |           | coyote             | 0.20     | 0.35     | 1.14      | 1.96  | 2.11  |
|                       |           |                       |           | eastern chipmunk   | -1.04    | -0.74    | 0.76      | 2.19  | 2.46  |
|                       |           |                       |           | elk                | -6.34    | -5.02    | -0.32     | 4.67  | 6.27  |
|                       |           |                       |           | flying squirrel sp | -3.96    | -3.15    | 0.38      | 4.48  | 5.40  |
|                       |           |                       |           | fox squirrel       | -3.57    | -3.48    | -2.96     | -2.47 | -2.38 |
|                       |           |                       |           | gray fox           | -0.72    | -0.27    | 2.23      | 5.02  | 5.60  |
|                       |           |                       |           | gray squirrel sp   | 2.47     | 2.50     | 2.68      | 2.85  | 2.88  |
|                       |           |                       |           | mule deer          | -3.39    | -2.71    | 0.34      | 3.43  | 4.05  |
| north american badger | -5.73     |                       |           | -4.31              | 0.15     | 4.85     | 6.29      |       |       |
| north american beaver | -7.31     |                       |           | -5.81              | -0.29    | 4.83     | 6.20      |       |       |
| north american mink   | -3.06     |                       |           | -2.51              | -0.03    | 2.48     | 2.99      |       |       |
| raccoon               | -1.29     |                       |           | -1.24              | -1.03    | -0.82    | -0.78     |       |       |
| red fox               | 1.77      |                       |           | 1.89               | 2.56     | 3.25     | 3.38      |       |       |
| red squirrel          | -5.11     |                       |           | -4.07              | 0.24     | 4.48     | 5.53      |       |       |
| striped skunk         | -4.73     |                       |           | -4.37              | -2.68    | -1.04    | -0.72     |       |       |
| virginia opossum      | -0.61     |                       |           | -0.55              | -0.26    | 0.04     | 0.09      |       |       |
| white tailed deer     | -1.27     |                       |           | -1.22              | -0.98    | -0.74    | -0.69     |       |       |
| woodchuck             | 0.07      |                       |           | 0.32               | 1.67     | 3.12     | 3.42      |       |       |
| gent X imp            |           |                       |           | armadillo          | -15.04   | -11.81   | -1.38     | 7.99  | 10.84 |
|                       |           |                       |           | bobcat             | -9.87    | -7.73    | -1.59     | 4.42  | 6.03  |
|                       |           | cottontail sp         | 0.32      | 0.53               | 1.70     | 2.88     | 3.11      |       |       |
|                       |           | coyote                | -2.44     | -2.10              | -0.50    | 1.10     | 1.38      |       |       |
|                       |           | eastern chipmunk      | -0.37     | 1.35               | 9.26     | 16.96    | 18.52     |       |       |
|                       |           | elk                   | -15.29    | -10.50             | -0.75    | 9.01     | 14.27     |       |       |
|                       |           | flying squirrel sp    | -7.25     | -5.71              | -0.18    | 6.67     | 8.84      |       |       |

**Table S36:** Species and city-specific detection parameters. Note that all of these species do not likely reside in this city (that is controlled by another level of the model). (continued)

| City                  | Parameter             | Species               | CI(0.025) | CI(0.05) | Estimate | CI(0.95) | CI(0.975) |
|-----------------------|-----------------------|-----------------------|-----------|----------|----------|----------|-----------|
| Tacoma, WA            | intercept             | fox squirrel          | -4.58     | -4.01    | -1.01    | 1.80     | 2.35      |
|                       |                       | gray fox              | -7.64     | -6.17    | 0.55     | 7.38     | 8.70      |
|                       |                       | gray squirrel sp      | -2.89     | -2.77    | -2.14    | -1.51    | -1.41     |
|                       |                       | mule deer             | -17.97    | -13.86   | -1.10    | 11.64    | 15.44     |
|                       |                       | north american badger | -10.78    | -7.94    | -0.73    | 6.61     | 9.18      |
|                       |                       | north american beaver | -12.92    | -9.91    | -1.63    | 5.77     | 7.82      |
|                       |                       | north american mink   | -5.72     | -4.64    | 0.61     | 6.75     | 8.21      |
|                       |                       | raccoon               | -5.96     | -5.77    | -4.83    | -3.90    | -3.73     |
|                       |                       | red fox               | -8.08     | -7.48    | -4.26    | -1.00    | -0.39     |
|                       |                       | red squirrel          | -14.43    | -10.91   | -1.41    | 8.71     | 12.30     |
|                       |                       | striped skunk         | -10.53    | -8.65    | -1.85    | 4.27     | 5.65      |
|                       |                       | virginia opossum      | -1.56     | -1.39    | -0.57    | 0.26     | 0.40      |
|                       |                       | white tailed deer     | -25.89    | -24.86   | -19.61   | -14.92   | -14.15    |
|                       |                       | woodchuck             | -7.66     | -6.78    | -2.37    | 1.60     | 2.38      |
|                       |                       | armadillo             | -3.68     | -3.39    | -2.06    | -0.71    | -0.45     |
|                       |                       | bobcat                | -5.88     | -5.63    | -4.30    | -3.03    | -2.77     |
|                       |                       | cottontail sp         | -1.65     | -1.63    | -1.53    | -1.43    | -1.41     |
|                       |                       | coyote                | -2.24     | -2.22    | -2.12    | -2.02    | -2.00     |
|                       |                       | eastern chipmunk      | -3.62     | -3.48    | -2.77    | -2.17    | -2.08     |
|                       |                       | elk                   | -5.06     | -4.70    | -3.32    | -2.32    | -2.15     |
|                       | flying squirrel sp    | -6.15                 | -5.71     | -3.75    | -1.95    | -1.62    |           |
|                       | fox squirrel          | -4.62                 | -4.27     | -2.80    | -1.72    | -1.52    |           |
|                       | gray fox              | -5.45                 | -4.99     | -2.95    | -1.13    | -0.74    |           |
|                       | gray squirrel sp      | -0.57                 | -0.56     | -0.50    | -0.44    | -0.43    |           |
|                       | mule deer             | -1.44                 | -1.43     | -1.34    | -1.27    | -1.25    |           |
|                       | north american badger | -5.82                 | -5.44     | -3.71    | -2.06    | -1.72    |           |
|                       | north american beaver | -6.12                 | -5.73     | -4.04    | -2.44    | -2.12    |           |
|                       | north american mink   | -6.27                 | -5.93     | -4.27    | -2.82    | -2.49    |           |
|                       | raccoon               | -1.20                 | -1.18     | -1.12    | -1.06    | -1.05    |           |
|                       | red fox               | -4.24                 | -3.94     | -2.41    | -0.91    | -0.64    |           |
|                       | red squirrel          | -4.22                 | -3.90     | -2.30    | -0.83    | -0.49    |           |
|                       | striped skunk         | -2.20                 | -2.15     | -1.90    | -1.68    | -1.64    |           |
|                       | virginia opossum      | -1.67                 | -1.65     | -1.57    | -1.48    | -1.46    |           |
|                       | white tailed deer     | -3.22                 | -2.90     | -1.50    | -0.18    | 0.07     |           |
|                       | woodchuck             | -4.58                 | -4.31     | -2.91    | -1.61    | -1.34    |           |
|                       | gent                  | armadillo             | -1.94     | -1.62    | -0.07    | 1.41     | 1.76      |
|                       | bobcat                | -2.41                 | -2.05     | -0.56    | 0.83     | 1.16     |           |
|                       | cottontail sp         | 0.41                  | 0.44      | 0.62     | 0.80     | 0.83     |           |
|                       | coyote                | 0.09                  | 0.13      | 0.33     | 0.52     | 0.55     |           |
|                       | eastern chipmunk      | -3.24                 | -2.80     | -0.98    | 0.72     | 1.10     |           |
| elk                   | -3.35                 | -2.90                 | -0.85     | 1.12     | 1.57     |          |           |
| flying squirrel sp    | -3.34                 | -2.93                 | -1.12     | 0.64     | 1.02     |          |           |
| fox squirrel          | -2.33                 | -1.98                 | -0.20     | 1.37     | 1.74     |          |           |
| gray fox              | -5.74                 | -4.76                 | -0.68     | 3.20     | 4.18     |          |           |
| gray squirrel sp      | -0.08                 | -0.06                 | 0.05      | 0.16     | 0.18     |          |           |
| mule deer             | -2.49                 | -2.38                 | -1.81     | -1.34    | -1.25    |          |           |
| north american badger | -2.94                 | -2.50                 | -0.72     | 1.05     | 1.52     |          |           |
| north american beaver | -2.78                 | -2.28                 | -0.20     | 1.66     | 2.06     |          |           |
| north american mink   | -2.37                 | -1.94                 | -0.19     | 1.49     | 1.82     |          |           |

**Table S36:** Species and city-specific detection parameters. Note that all of these species do not likely reside in this city (that is controlled by another level of the model). (continued)

| City | Parameter             | Species            | CI(0.025)             | CI(0.05) | Estimate | CI(0.95) | CI(0.975) |      |
|------|-----------------------|--------------------|-----------------------|----------|----------|----------|-----------|------|
|      | imp                   | raccoon            | -0.24                 | -0.21    | -0.06    | 0.09     | 0.12      |      |
|      |                       | red fox            | -2.43                 | -2.00    | 0.09     | 2.09     | 2.55      |      |
|      |                       | red squirrel       | -3.10                 | -2.75    | -1.10    | 0.60     | 1.02      |      |
|      |                       | striped skunk      | -2.53                 | -2.31    | -1.38    | -0.61    | -0.49     |      |
|      |                       | virginia opossum   | -0.60                 | -0.56    | -0.33    | -0.11    | -0.07     |      |
|      |                       | white tailed deer  | -2.04                 | -1.68    | -0.07    | 1.44     | 1.76      |      |
|      |                       | woodchuck          | -2.51                 | -2.15    | -0.69    | 0.76     | 1.10      |      |
|      |                       | armadillo          | -3.68                 | -2.96    | 0.01     | 2.96     | 3.71      |      |
|      |                       | bobcat             | -5.61                 | -5.00    | -1.77    | 1.25     | 1.82      |      |
|      |                       | cottontail sp      | 0.57                  | 0.67     | 1.15     | 1.65     | 1.75      |      |
|      |                       | coyote             | -1.09                 | -1.02    | -0.65    | -0.28    | -0.21     |      |
|      |                       | eastern chipmunk   | -4.26                 | -3.93    | -2.21    | -0.68    | -0.42     |      |
|      |                       | elk                | -8.02                 | -7.16    | -3.81    | -1.35    | -0.96     |      |
|      |                       | flying squirrel sp | -5.79                 | -4.53    | -0.06    | 4.72     | 6.11      |      |
|      |                       | fox squirrel       | -7.48                 | -6.43    | -1.29    | 3.45     | 4.33      |      |
|      |                       | gray fox           | -5.06                 | -4.04    | 0.27     | 4.69     | 5.72      |      |
|      |                       | gray squirrel sp   | 0.92                  | 0.97     | 1.25     | 1.53     | 1.58      |      |
|      |                       | mule deer          | -0.51                 | -0.45    | -0.16    | 0.13     | 0.18      |      |
|      |                       | gent X imp         | north american badger | -5.65    | -4.27    | 0.20     | 4.87      | 6.09 |
|      |                       |                    | north american beaver | -6.92    | -5.38    | -0.08    | 5.24      | 6.60 |
|      | north american mink   |                    | -3.65                 | -2.94    | 0.21     | 3.39     | 4.12      |      |
|      | raccoon               |                    | 0.80                  | 0.85     | 1.12     | 1.39     | 1.44      |      |
|      | red fox               |                    | -3.09                 | -2.38    | 0.79     | 3.84     | 4.51      |      |
|      | red squirrel          |                    | -5.15                 | -4.01    | 0.22     | 4.37     | 5.43      |      |
|      | striped skunk         |                    | -8.66                 | -8.28    | -6.25    | -4.42    | -4.09     |      |
|      | virginia opossum      |                    | -0.46                 | -0.38    | 0.03     | 0.44     | 0.51      |      |
|      | white tailed deer     |                    | -6.13                 | -5.12    | -0.24    | 4.70     | 5.96      |      |
|      | woodchuck             |                    | -5.19                 | -4.00    | 1.14     | 5.89     | 6.99      |      |
|      | armadillo             |                    | -13.34                | -10.67   | -0.87    | 8.50     | 11.44     |      |
|      | bobcat                |                    | -8.71                 | -6.94    | -1.17    | 5.18     | 6.81      |      |
|      | cottontail sp         |                    | -1.06                 | -0.90    | -0.06    | 0.81     | 0.97      |      |
|      | coyote                |                    | -0.89                 | -0.66    | 0.48     | 1.62     | 1.82      |      |
|      | eastern chipmunk      |                    | -20.86                | -17.01   | -1.01    | 15.01    | 19.69     |      |
|      | elk                   |                    | -13.77                | -9.81    | -0.69    | 9.61     | 14.61     |      |
|      | flying squirrel sp    |                    | -10.51                | -8.03    | -1.01    | 5.85     | 8.21      |      |
|      | fox squirrel          |                    | -23.24                | -18.87   | -2.07    | 14.96    | 19.61     |      |
|      | gray fox              |                    | -16.13                | -13.20   | -1.04    | 11.18    | 14.15     |      |
|      | gray squirrel sp      |                    | -1.49                 | -1.38    | -0.84    | -0.29    | -0.18     |      |
|      | mule deer             | -2.56              | -1.50                 | 3.56     | 7.90     | 8.67     |           |      |
|      | north american badger | -11.33             | -8.53                 | -0.85    | 6.48     | 9.59     |           |      |
|      | north american beaver | -11.57             | -9.20                 | -1.31    | 6.71     | 8.96     |           |      |
|      | north american mink   | -11.88             | -9.41                 | -1.01    | 7.26     | 9.68     |           |      |
|      | raccoon               | -2.89              | -2.77                 | -2.09    | -1.42    | -1.29    |           |      |
|      | red fox               | -12.29             | -10.40                | -1.63    | 6.99     | 9.09     |           |      |
|      | red squirrel          | -14.66             | -10.95                | -1.41    | 8.83     | 12.78    |           |      |
|      | striped skunk         | -10.02             | -8.24                 | -1.44    | 4.91     | 6.57     |           |      |
|      | virginia opossum      | -2.89              | -2.63                 | -1.33    | -0.01    | 0.23     |           |      |
|      | white tailed deer     | -17.00             | -13.85                | -1.47    | 11.54    | 14.51    |           |      |
|      | woodchuck             | -10.06             | -8.22                 | -0.58    | 6.80     | 8.61     |           |      |



**Table S36:** Species and city-specific detection parameters. Note that all of these species do not likely reside in this city (that is controlled by another level of the model). (continued)

| City               | Parameter             | Species               | CI(0.025)     | CI(0.05) | Estimate | CI(0.95) | CI(0.975) |      |
|--------------------|-----------------------|-----------------------|---------------|----------|----------|----------|-----------|------|
| Urbana, IL         | intercept             | armadillo             | -3.66         | -3.40    | -2.06    | -0.76    | -0.46     |      |
|                    |                       | bobcat                | -6.42         | -6.14    | -4.85    | -3.82    | -3.65     |      |
|                    |                       | cottontail sp         | -0.88         | -0.87    | -0.82    | -0.77    | -0.76     |      |
|                    |                       | coyote                | -2.62         | -2.60    | -2.48    | -2.36    | -2.34     |      |
|                    |                       | eastern chipmunk      | -1.55         | -1.53    | -1.43    | -1.32    | -1.30     |      |
|                    |                       | elk                   | -5.32         | -4.94    | -3.27    | -1.66    | -1.30     |      |
|                    |                       | flying squirrel sp    | -6.05         | -5.69    | -4.17    | -2.97    | -2.76     |      |
|                    |                       | fox squirrel          | -0.99         | -0.98    | -0.90    | -0.83    | -0.82     |      |
|                    |                       | gray fox              | -5.96         | -5.48    | -3.18    | -1.20    | -0.82     |      |
|                    |                       | gray squirrel sp      | -0.44         | -0.43    | -0.38    | -0.34    | -0.33     |      |
|                    |                       | mule deer             | -3.42         | -3.11    | -1.69    | -0.34    | -0.05     |      |
|                    |                       | north american badger | -4.78         | -4.52    | -3.37    | -2.43    | -2.27     |      |
|                    |                       | north american beaver | -5.97         | -5.69    | -4.38    | -3.35    | -3.16     |      |
|                    |                       | north american mink   | -3.37         | -3.32    | -3.09    | -2.88    | -2.85     |      |
|                    |                       | raccoon               | -0.50         | -0.49    | -0.44    | -0.40    | -0.39     |      |
|                    |                       | red fox               | -3.44         | -3.39    | -3.14    | -2.91    | -2.86     |      |
|                    |                       | red squirrel          | -4.32         | -3.96    | -2.29    | -0.78    | -0.47     |      |
|                    |                       | striped skunk         | -3.11         | -3.07    | -2.86    | -2.66    | -2.62     |      |
|                    |                       | virginia opossum      | -0.99         | -0.98    | -0.93    | -0.88    | -0.87     |      |
|                    |                       | white tailed deer     | -0.56         | -0.55    | -0.50    | -0.44    | -0.43     |      |
|                    |                       | woodchuck             | -3.11         | -3.06    | -2.80    | -2.56    | -2.51     |      |
|                    |                       | gent                  | armadillo     | -1.92    | -1.58    | -0.04    | 1.42      | 1.77 |
|                    |                       |                       | bobcat        | -2.20    | -1.87    | -0.43    | 1.00      | 1.33 |
|                    |                       |                       | cottontail sp | -1.49    | -1.22    | -0.03    | 1.14      | 1.37 |
|                    | coyote                |                       | -0.90         | -0.68    | 0.30     | 1.30     | 1.49      |      |
|                    | eastern chipmunk      |                       | -2.47         | -2.09    | -0.50    | 1.14     | 1.51      |      |
|                    | elk                   |                       | -3.15         | -2.72    | -0.72    | 1.31     | 1.81      |      |
|                    | flying squirrel sp    |                       | -3.33         | -2.89    | -1.10    | 0.68     | 1.11      |      |
|                    | fox squirrel          |                       | -1.73         | -1.40    | 0.11     | 1.63     | 1.92      |      |
|                    | gray fox              |                       | -5.75         | -4.74    | -0.62    | 3.36     | 4.36      |      |
|                    | gray squirrel sp      |                       | -1.30         | -1.12    | -0.26    | 0.62     | 0.78      |      |
|                    | mule deer             |                       | -3.19         | -2.83    | -1.30    | 0.34     | 0.70      |      |
|                    | north american badger |                       | -2.98         | -2.51    | -0.74    | 1.05     | 1.47      |      |
|                    | north american beaver |                       | -2.85         | -2.34    | -0.19    | 1.70     | 2.11      |      |
|                    | north american mink   |                       | -2.52         | -2.12    | -0.31    | 1.37     | 1.74      |      |
|                    | raccoon               |                       | -0.08         | 0.17     | 1.27     | 2.45     | 2.72      |      |
|                    | red fox               |                       | -0.91         | -0.57    | 1.04     | 2.69     | 3.04      |      |
|                    | red squirrel          |                       | -3.17         | -2.80    | -1.10    | 0.65     | 1.10      |      |
|                    | striped skunk         |                       | -2.35         | -2.06    | -0.72    | 0.56     | 0.85      |      |
|                    | virginia opossum      |                       | -1.37         | -1.20    | -0.31    | 0.53     | 0.69      |      |
|                    | white tailed deer     |                       | -1.31         | -1.02    | 0.40     | 1.87     | 2.19      |      |
|                    | woodchuck             |                       | -1.51         | -1.26    | -0.10    | 1.20     | 1.45      |      |
|                    | imp                   |                       | armadillo     | -3.60    | -2.93    | 0.10     | 3.12      | 3.87 |
|                    |                       | bobcat                | -4.68         | -3.73    | 0.71     | 6.14     | 7.39      |      |
|                    |                       | cottontail sp         | 0.68          | 0.75     | 1.09     | 1.44     | 1.51      |      |
|                    |                       | coyote                | -2.13         | -1.83    | -0.60    | 0.56     | 0.77      |      |
| eastern chipmunk   |                       | 1.02                  | 1.17          | 1.96     | 2.71     | 2.86     |           |      |
| elk                |                       | -6.39                 | -5.16         | -0.38    | 4.58     | 6.23     |           |      |
| flying squirrel sp |                       | -5.34                 | -4.16         | 0.06     | 4.79     | 6.04     |           |      |

**Table S36:** Species and city-specific detection parameters. Note that all of these species do not likely reside in this city (that is controlled by another level of the model). (continued)

| City                  | Parameter  | Species               | CI(0.025) | CI(0.05) | Estimate | CI(0.95) | CI(0.975) |
|-----------------------|------------|-----------------------|-----------|----------|----------|----------|-----------|
|                       | gent X imp | fox squirrel          | -6.07     | -5.94    | -5.12    | -4.36    | -4.22     |
|                       |            | gray fox              | -5.18     | -4.03    | 0.35     | 4.80     | 5.93      |
|                       |            | gray squirrel sp      | 3.14      | 3.20     | 3.54     | 3.88     | 3.95      |
|                       |            | mule deer             | -3.44     | -2.77    | 0.32     | 3.45     | 4.10      |
|                       |            | north american badger | -6.25     | -4.71    | -0.07    | 4.21     | 5.42      |
|                       |            | north american beaver | -5.69     | -4.57    | -0.03    | 4.49     | 5.42      |
|                       |            | north american mink   | -1.64     | -1.40    | -0.13    | 1.04     | 1.28      |
|                       |            | raccoon               | -2.79     | -2.72    | -2.36    | -2.00    | -1.93     |
|                       |            | red fox               | -1.31     | -0.92    | 0.64     | 2.10     | 2.41      |
|                       |            | red squirrel          | -5.24     | -4.21    | 0.21     | 4.41     | 5.45      |
|                       |            | striped skunk         | 5.53      | 5.71     | 6.61     | 7.54     | 7.72      |
|                       |            | virginia opossum      | 3.05      | 3.11     | 3.46     | 3.81     | 3.87      |
|                       |            | white tailed deer     | -2.59     | -2.49    | -1.99    | -1.52    | -1.43     |
|                       |            | woodchuck             | 4.30      | 4.47     | 5.36     | 6.30     | 6.49      |
|                       |            | armadillo             | -13.41    | -10.71   | -1.01    | 8.89     | 11.68     |
|                       |            | bobcat                | -9.02     | -7.13    | -1.27    | 4.74     | 6.46      |
|                       |            | cottontail sp         | -4.82     | -3.92    | 0.17     | 4.51     | 5.45      |
|                       |            | coyote                | -3.14     | -2.45    | 1.04     | 4.64     | 5.35      |
|                       |            | eastern chipmunk      | -2.00     | -0.69    | 5.19     | 10.87    | 12.25     |
|                       |            | elk                   | -16.00    | -11.02   | -0.81    | 9.23     | 13.89     |
|                       |            | flying squirrel sp    | -10.67    | -8.07    | -0.96    | 6.08     | 8.44      |
|                       |            | fox squirrel          | -3.77     | -2.65    | 2.80     | 8.34     | 9.49      |
|                       |            | gray fox              | -15.93    | -13.11   | -0.94    | 11.62    | 14.64     |
|                       |            | gray squirrel sp      | -3.33     | -2.76    | 0.35     | 3.50     | 4.09      |
|                       |            | mule deer             | -17.44    | -13.74   | -0.97    | 11.81    | 16.10     |
|                       |            | north american badger | -11.09    | -8.30    | -0.84    | 6.47     | 8.79      |
|                       |            | north american beaver | -11.94    | -9.34    | -1.36    | 6.79     | 9.25      |
|                       |            | north american mink   | -13.69    | -10.78   | -1.79    | 6.32     | 8.56      |
|                       |            | raccoon               | 1.64      | 2.52     | 6.79     | 11.00    | 11.79     |
|                       |            | red fox               | -3.81     | -2.69    | 3.14     | 9.09     | 10.31     |
|                       |            | red squirrel          | -14.34    | -10.98   | -1.39    | 8.19     | 11.59     |
|                       |            | striped skunk         | -9.54     | -7.88    | -0.77    | 5.95     | 7.50      |
|                       |            | virginia opossum      | -5.91     | -5.29    | -2.30    | 0.81     | 1.44      |
|                       |            | white tailed deer     | 0.31      | 1.48     | 6.77     | 11.97    | 13.01     |
|                       |            | woodchuck             | -1.46     | -0.57    | 4.03     | 8.24     | 9.12      |
|                       |            | armadillo             | -3.66     | -3.40    | -2.07    | -0.73    | -0.45     |
|                       |            | bobcat                | -5.95     | -5.58    | -3.95    | -2.45    | -2.11     |
|                       |            | cottontail sp         | -1.72     | -1.70    | -1.57    | -1.44    | -1.41     |
|                       |            | coyote                | -4.60     | -4.46    | -3.79    | -3.16    | -3.05     |
|                       |            | eastern chipmunk      | -2.93     | -2.77    | -2.00    | -1.31    | -1.18     |
|                       |            | elk                   | -5.32     | -4.92    | -3.25    | -1.64    | -1.30     |
|                       |            | flying squirrel sp    | -4.08     | -3.86    | -2.83    | -1.95    | -1.79     |
| fox squirrel          | -3.64      | -3.31                 | -1.82     | -0.42    | -0.14    |          |           |
| gray fox              | -5.69      | -5.16                 | -3.05     | -1.14    | -0.74    |          |           |
| gray squirrel sp      | 0.06       | 0.07                  | 0.14      | 0.20     | 0.22     |          |           |
| mule deer             | -3.45      | -3.15                 | -1.68     | -0.31    | -0.03    |          |           |
| north american badger | -5.82      | -5.44                 | -3.71     | -2.01    | -1.70    |          |           |
| north american beaver | -4.91      | -4.73                 | -3.86     | -3.10    | -2.98    |          |           |
| north american mink   | -4.33      | -4.23                 | -3.80     | -3.41    | -3.34    |          |           |
| Wilmington, DE        | intercept  |                       |           |          |          |          |           |

**Table S36:** Species and city-specific detection parameters. Note that all of these species do not likely reside in this city (that is controlled by another level of the model). (continued)

| City | Parameter             | Species             | CI(0.025)             | CI(0.05) | Estimate | CI(0.95) | CI(0.975) |      |
|------|-----------------------|---------------------|-----------------------|----------|----------|----------|-----------|------|
| gent |                       | raccoon             | -1.08                 | -1.06    | -0.99    | -0.92    | -0.91     |      |
|      |                       | red fox             | -1.44                 | -1.42    | -1.35    | -1.27    | -1.25     |      |
|      |                       | red squirrel        | -2.24                 | -2.03    | -1.13    | -0.31    | -0.15     |      |
|      |                       | striped skunk       | -3.80                 | -3.73    | -3.41    | -3.11    | -3.06     |      |
|      |                       | virginia opossum    | -2.20                 | -2.18    | -2.07    | -1.97    | -1.95     |      |
|      |                       | white tailed deer   | -1.49                 | -1.48    | -1.40    | -1.32    | -1.30     |      |
|      |                       | woodchuck           | -2.97                 | -2.93    | -2.69    | -2.46    | -2.42     |      |
|      |                       | armadillo           | -1.91                 | -1.57    | -0.03    | 1.39     | 1.68      |      |
|      |                       | bobcat              | -2.27                 | -1.92    | -0.40    | 1.01     | 1.32      |      |
|      |                       | cottontail sp       | -0.73                 | -0.69    | -0.49    | -0.30    | -0.26     |      |
|      |                       | coyote              | -2.73                 | -2.41    | -1.01    | 0.30     | 0.56      |      |
|      |                       | eastern chipmunk    | -3.92                 | -3.44    | -1.30    | 0.53     | 0.96      |      |
|      |                       | elk                 | -3.12                 | -2.68    | -0.68    | 1.31     | 1.79      |      |
|      |                       | flying squirrel sp  | -3.14                 | -2.83    | -1.24    | 0.16     | 0.46      |      |
|      |                       | fox squirrel        | -2.14                 | -1.78    | -0.11    | 1.52     | 1.90      |      |
|      |                       | gray fox            | -5.77                 | -4.82    | -0.84    | 3.10     | 4.08      |      |
|      |                       | gray squirrel sp    | -1.00                 | -0.98    | -0.88    | -0.77    | -0.75     |      |
|      |                       | mule deer           | -3.16                 | -2.82    | -1.29    | 0.32     | 0.76      |      |
|      | imp                   |                     | north american badger | -2.92    | -2.49    | -0.69    | 1.07      | 1.50 |
|      |                       |                     | north american beaver | 0.68     | 0.81     | 1.60     | 2.50      | 2.69 |
|      |                       | north american mink | -1.80                 | -1.60    | -0.69    | 0.18     | 0.34      |      |
|      |                       | raccoon             | 0.18                  | 0.20     | 0.30     | 0.41     | 0.43      |      |
|      |                       | red fox             | 0.09                  | 0.11     | 0.23     | 0.35     | 0.37      |      |
|      |                       | red squirrel        | -3.47                 | -3.03    | -1.21    | 0.59     | 0.94      |      |
|      |                       | striped skunk       | -0.99                 | -0.85    | -0.16    | 0.52     | 0.63      |      |
|      |                       | virginia opossum    | 0.15                  | 0.18     | 0.36     | 0.53     | 0.56      |      |
|      |                       | white tailed deer   | 0.32                  | 0.34     | 0.46     | 0.58     | 0.60      |      |
|      |                       | woodchuck           | -0.39                 | -0.33    | -0.02    | 0.30     | 0.37      |      |
|      |                       | armadillo           | -3.57                 | -2.90    | 0.08     | 3.14     | 3.79      |      |
|      |                       | bobcat              | -6.30                 | -5.10    | -0.11    | 5.08     | 6.37      |      |
|      |                       | cottontail sp       | 2.16                  | 2.35     | 3.42     | 4.53     | 4.74      |      |
|      |                       | coyote              | -2.17                 | -1.67    | 0.63     | 3.15     | 3.72      |      |
|      |                       | eastern chipmunk    | -5.40                 | -4.70    | -1.14    | 2.09     | 2.71      |      |
|      |                       | elk                 | -6.26                 | -5.00    | -0.39    | 4.59     | 6.04      |      |
|      |                       | flying squirrel sp  | -7.51                 | -6.36    | -1.69    | 1.71     | 2.42      |      |
|      |                       | fox squirrel        | -5.99                 | -4.98    | -0.08    | 4.86     | 5.91      |      |
|      |                       | gray fox            | -5.26                 | -4.13    | 0.39     | 4.78     | 5.76      |      |
|      |                       | gray squirrel sp    | 2.25                  | 2.33     | 2.75     | 3.18     | 3.27      |      |
|      | mule deer             | -3.35               | -2.68                 | 0.32     | 3.40     | 4.08     |           |      |
|      | north american badger | -5.79               | -4.40                 | 0.09     | 4.76     | 6.08     |           |      |
|      | north american beaver | -10.16              | -8.92                 | -2.38    | 2.32     | 3.29     |           |      |
|      | north american mink   | -3.75               | -3.23                 | -0.59    | 1.82     | 2.29     |           |      |
|      | raccoon               | -0.96               | -0.86                 | -0.40    | 0.06     | 0.16     |           |      |
|      | red fox               | -1.66               | -1.56                 | -1.07    | -0.58    | -0.48    |           |      |
|      | red squirrel          | -5.77               | -4.80                 | -0.70    | 2.90     | 3.55     |           |      |
|      | striped skunk         | 1.38                | 2.08                  | 5.43     | 8.78     | 9.38     |           |      |
|      | virginia opossum      | 1.42                | 1.57                  | 2.40     | 3.25     | 3.39     |           |      |
|      | white tailed deer     | -3.49               | -3.39                 | -2.88    | -2.37    | -2.28    |           |      |
|      | woodchuck             | -2.51               | -2.22                 | -0.75    | 0.74     | 1.03     |           |      |

**Table S36:** Species and city-specific detection parameters. Note that all of these species do not likely reside in this city (that is controlled by another level of the model). (*continued*)

| City | Parameter  | Species               | CI(0.025) | CI(0.05) | Estimate | CI(0.95) | CI(0.975) |
|------|------------|-----------------------|-----------|----------|----------|----------|-----------|
|      | gent X imp | armadillo             | -13.21    | -10.52   | -0.88    | 8.41     | 11.64     |
|      |            | bobcat                | -8.71     | -7.19    | -1.28    | 4.92     | 6.75      |
|      |            | cottontail sp         | -5.93     | -5.63    | -4.08    | -2.54    | -2.28     |
|      |            | coyote                | -7.16     | -5.98    | -1.03    | 3.57     | 4.54      |
|      |            | eastern chipmunk      | -23.82    | -19.62   | -2.53    | 13.84    | 18.09     |
|      |            | elk                   | -16.27    | -11.05   | -0.82    | 8.92     | 13.94     |
|      |            | flying squirrel sp    | -10.54    | -8.11    | -1.22    | 5.24     | 7.06      |
|      |            | fox squirrel          | -22.82    | -17.89   | -0.94    | 15.99    | 20.98     |
|      |            | gray fox              | -16.62    | -13.41   | -1.14    | 11.02    | 13.58     |
|      |            | gray squirrel sp      | 0.05      | 0.17     | 0.75     | 1.33     | 1.44      |
|      |            | mule deer             | -17.98    | -14.09   | -1.03    | 11.75    | 15.48     |
|      |            | north american badger | -11.03    | -8.08    | -0.74    | 6.41     | 8.95      |
|      |            | north american beaver | -13.84    | -12.63   | -6.27    | -0.60    | 0.30      |
|      |            | north american mink   | -14.83    | -13.10   | -5.54    | 0.27     | 1.25      |
|      |            | raccoon               | -1.30     | -1.17    | -0.54    | 0.09     | 0.22      |
|      |            | red fox               | 1.01      | 1.13     | 1.77     | 2.44     | 2.57      |
|      |            | red squirrel          | -15.37    | -11.73   | -1.66    | 8.02     | 11.57     |
|      |            | striped skunk         | -5.91     | -5.01    | -1.09    | 2.83     | 3.54      |
|      |            | virginia opossum      | -4.24     | -4.05    | -3.02    | -2.01    | -1.82     |
|      |            | white tailed deer     | 2.39      | 2.53     | 3.29     | 4.06     | 4.20      |
|      |            | woodchuck             | -3.93     | -3.52    | -1.29    | 0.86     | 1.25      |

## SI references

1. S. B. Magle, M. Fidino, H. A. Sander, A. T. Rohnke, K. L. Larson, T. Gallo, C. A. M. Kay, E. W. Lehrer, M. H. Murray, S. A. Adalsteinsson, A. A. Ahlers, W. J. B. Anthonyamy, A. R. Gramza, A. M. Green, M. J. Jordan, J. S. Lewis, R. A. Long, B. MacDougall, M. E. Pendergast, K. Remine, K. Conrad Simon, C. C. St. Clair, C. J. Shier, T. Stankowich, C. J. Stevenson, A. J. Zellmer, C. J. Schell. Wealth and urbanization shape medium and large mammalian communities. *Global Change Biology* 27(21), 5446–5459 (2021).
2. IUCN. The IUCN red list of threatened species, version 2020-2 (2020); <https://iucnredlist.org>.
3. M. Kéry, J. A. Royle. *Applied Hierarchical Modeling in Ecology: Analysis of distribution, abundance, and species richness in R and BUGS: Volume 1* (Academic Press, 2015).
4. R Core Team. R: a language environment for statistical computing, version 4.2.0 (2022); <https://www.R-project.org>.
5. J. Oksanen, G. Simpson, F. Blanchet, R. Kindt, P. Legendre, P. Minchin, R. O’Hara, P. Solymos, M. Stevens, E. Szoecs, H. Wagner, M. Barbour, M. Bedward, B. Bolker, D. Borcard, G. Carvalho, M. Chirico, M. De Caceres, S. Durand, H. Evangelista, R. FitzJohn, M. Friendly, B. Furneaux, G. Hannigan, M. Hill, L. Lahti, D. McGlenn, M. Ouellette, E. Ribeiro Cunha, T. Smith, A. Stier, C. Ter Braak, J. Weedon. *vegan: community ecology*, version 2.6.4 (2022); <https://CRAN.R-project.org/package=vegan>.
6. S. Ferrier, G. Manion, J. Elith, K. Richardson. Using generalized dissimilarity modeling to analyze and predict patterns of beta diversity in regional biodiversity assessment. *Diversity and Distributions* 13(3), 252–624 (2007).
7. K. Mokany, C. Ware, S. N. Woolley, S. Ferrier, M. C. Fitzpatrick. A working guide to harnessing generalized dissimilarity modeling for biodiversity analysis and conservation assessment. *Global Ecology and Biogeography* 31(4), 802–821 (2022).
8. J. O. Ramsay. Monotone regression splines in action. *Statistical science* 3(4), 425–441 (1988).
9. K. Chapple, P. Waddel, D. Chatman, M. Zuk, A. Lokaitou-Sideris, P. Ong, K. Gorska, C. Pech, S. R. Gonzalez. “Developing a new methodology for analyzing potential displacement” (University of California, Berkeley, 2017).
10. K. Walker, M. Herman. *tidycensus: Load US Census boundary and attribute data as tidyverse and sf ready data frames*, version 1.4.4 (2023); <https://CRAN.R-project.org/package=tidycensus>.
